# Supplementary material for: Elephant shark genome provides unique insights into gnathostome evolution
Source: PubMed Central journal article supplement — Nature. 2014 Jan 8;505(7482):174–9. doi: 10.1038/nature12826 (PMC3964593; doi:10.1038/nature12826), 2014-01-08
Supplement: NIHMS559768-supplement-Supplementary_Information.pdf [file NIHMS559768-supplement-Supplementary_Information.pdf]

## Supplementary Notes

|                                                                                                  |    |
|--------------------------------------------------------------------------------------------------|----|
| Summary of major findings .....                                                                  | 8  |
| Supplementary Note I. Genome sequencing, assembly and annotation .....                           | 13 |
| I.1 Sequencing and assembly .....                                                                | 13 |
| I.2 Ensembl genome annotation .....                                                              | 16 |
| I.3 SNP calling .....                                                                            | 17 |
| I.4 Heterozygosity .....                                                                         | 18 |
| I.5 Segmental duplication .....                                                                  | 19 |
| I.6 Identification of potential sex-chromosome .....                                             | 21 |
| Supplementary Note II. GC content and isochores .....                                            | 22 |
| II.1 Methods .....                                                                               | 22 |
| II.2 Results .....                                                                               | 23 |
| Supplementary Note III. Characterization of miRNA genes in <i>C. milii</i> .....                 | 26 |
| III.1 Methods .....                                                                              | 26 |
| III.2 Results .....                                                                              | 27 |
| Supplementary Note IV. Origin and evolution of conserved noncoding elements in vertebrates ..... | 30 |
| IV.1 Methods .....                                                                               | 30 |
| IV.2 Results .....                                                                               | 32 |
| Supplementary Note V. Phylogenomics of vertebrates .....                                         | 36 |
| V.1 Methods .....                                                                                | 36 |
| V.2 Results .....                                                                                | 38 |
| Supplementary Note VI. Rate of molecular evolution .....                                         | 40 |
| VI.1 Methods .....                                                                               | 40 |
| VI.2 Results .....                                                                               | 41 |
| Supplementary Note VII. Intron evolution in vertebrates .....                                    | 44 |
| VII.1 Methods .....                                                                              | 44 |
| VII.2 Results .....                                                                              | 46 |
| Supplementary Note VIII. Large-scale synteny analysis .....                                      | 47 |
| VIII.1 Identification of syntenic blocks .....                                                   | 47 |
| VIII.2 Large-scale synteny conservation .....                                                    | 47 |

|                                                                               |    |
|-------------------------------------------------------------------------------|----|
| Supplementary Note IX. Evolution of protein domains and gene families .....   | 50 |
| IXa. Protein domain analysis .....                                            | 50 |
| IXb. Evolution of protein-coding gene families in vertebrates.....            | 51 |
| IXc. Olfactory and vomeronasal receptor genes.....                            | 54 |
| Supplementary Note X. Genes involved in bone formation .....                  | 58 |
| Supplementary Note XI. Analysis of the immune system of <i>C. milii</i> ..... | 67 |
| XI.1 Strategy of analysis.....                                                | 67 |
| XI.2. Antigen recognition .....                                               | 67 |
| XI.3. Communication, Coordination, Response .....                             | 73 |
| XI.4. Effector cells and lymphoid organs .....                                | 80 |
| XI.5 Summary of major findings .....                                          | 83 |
| References.....                                                               | 85 |

## Supplementary Figures

|                                                                                                                                                    |     |
|----------------------------------------------------------------------------------------------------------------------------------------------------|-----|
| Supplementary Figure I.1   Boxplot of the heterozygosity in 1-kb windows of callable <i>C. milii</i> genome.....                                   | 96  |
| Supplementary Figure I.2   Mean heterozygosity in 100 windows of 1-kb of callable <i>C. milii</i> genome.....                                      | 97  |
| Supplementary Figure I.3   Quality assessment of the Roche 454 reads:.....                                                                         | 98  |
| Supplementary Figure I.4   Coverage distribution per non-repetitive base pair of the <i>C. milii</i> genome.....                                   | 99  |
| Supplementary Figure I.5   Sequence identity of reads to reference genome according to the scaffold length.....                                    | 100 |
| Supplementary Figure I.6   Mean coverage of the <i>C. milii</i> genome before and after normalization.....                                         | 101 |
| Supplementary Figure I.7   Distribution of duplicated sequences across scaffolds.....                                                              | 102 |
| Supplementary Figure II.1   Distribution of GC content in vertebrate genomes.....                                                                  | 103 |
| Supplementary Figure III.1   miRNA expression profile of the top 10 most highly expressed miRNAs in 16 tissues of <i>C. milii</i> .....            | 104 |
| Supplementary Figure III.2   Boxplot of expression levels for known and novel <i>C. milii</i> miRNAs identified in this study.....                 | 105 |
| Supplementary Figure III.3   Distribution of miRNA families across vertebrate lineages....                                                         | 106 |
| Supplementary Figure IV.1   A neutral tree of 12 vertebrate genomes.....                                                                           | 107 |
| Supplementary Figure V.1   The phylogenetic position of <i>C. milii</i> .....                                                                      | 108 |
| Supplementary Figure VI.1   <i>C. milii</i> genome is evolving slower than turtle genome.....                                                      | 109 |
| Supplementary Figure VIII.1   Circos plot of the top 50 <i>C. milii</i> scaffolds syntenic to human and chicken chromosomes.....                   | 110 |
| Supplementary Figure VIII.2   An extensively conserved syntenic block in the <i>C. milii</i> and human genomes.....                                | 112 |
| Supplementary Figure IX.1   Top 50 protein domains (PFAM) in <i>C. milii</i> , stickleback and human proteomes.....                                | 113 |
| Supplementary Figure IX.2   Neighbor joining tree of OR-like genes from <i>C. milii</i> , human, zebrafish and amphioxus.....                      | 114 |
| Supplementary Figure IX.3   Neighbor joining tree of V1R-like and V2R-like ( <i>OlfC</i> ) genes from <i>C. milii</i> , zebrafish and lamprey..... | 116 |
| Supplementary Figure X.1   The <i>Sparc</i> gene locus in human, elephant shark ( <i>C. milii</i> ) and medaka.....                                | 118 |
| Supplementary Figure X.2   The <i>Sparc11</i> locus in human, elephant shark ( <i>C. milii</i> ) and medaka.....                                   | 119 |
| Supplementary Figure X.3   Zebrafish <i>spp1</i> is expressed from 2 dpf specifically in cells surrounding the bone matrix.....                    | 120 |

|                                                                                                                                                  |     |
|--------------------------------------------------------------------------------------------------------------------------------------------------|-----|
| Supplementary Figure X.4   Reduction of bone deposition in <i>spp1</i> zebrafish morphants. ....                                                 | 121 |
| Supplementary Figure X.5   <i>spp1</i> gene knockdown in zebrafish. ....                                                                         | 123 |
| Supplementary Figure X.6   Targeted indel mutations induced by sgRNA:Cas9 mRNA in the zebrafish <i>spp1</i> . ....                               | 124 |
| Supplementary Figure X.7   Brightfield images of embryos shown in Fig. 4d. ....                                                                  | 125 |
| Supplementary Figure X.8   Alcian blue staining of embryos injected with Cas9 mRNA and various sgRNAs. ....                                      | 126 |
| Supplementary Figure X.9   Targeted mutagenesis of zebrafish <i>spp1</i> by sgRNA:Cas9 results in reduced bone formation in 15 dpf embryos. .... | 127 |
| Supplementary Figure XI.1   Multiple IgM genes in the genome of <i>C. milii</i> . ....                                                           | 128 |
| Supplementary Figure XI.2   MHC paralogous groups in <i>H. sapiens</i> and <i>C. milii</i> . ....                                                | 129 |
| Supplementary Figure XI.3   Chromosomal organization of interferon receptor and interferon genes in vertebrate genomes. ....                     | 130 |
| Supplementary Figure XI.4   Chromosomal organization of interleukin receptor and interleukin genes in vertebrate genomes. ....                   | 132 |
| Supplementary Figure XI.5   Protein sequence comparison of DNA binding domains of <i>Foxp3</i> -like genes. ....                                 | 133 |
| Supplementary Figure XI.6   <i>Zbtb7B/ThPOK</i> -like genes in vertebrates. ....                                                                 | 134 |
| Supplementary Figure XI.7   Phylogenetic analysis of CD8-like proteins of vertebrates. ....                                                      | 135 |
| Supplementary Figure XI.8   Protein signatures of LCK, and CD8 and CD4 co-receptors. .                                                           | 137 |
| Supplementary Figure XI.9   Phylogenetic analysis of CD4-like proteins of vertebrates. ....                                                      | 139 |
| Supplementary Figure XI.10   Phylogenetic analysis of CD4-like proteins of vertebrates. .                                                        | 140 |

## Supplementary Tables

|                                                                                                                                                                |     |
|----------------------------------------------------------------------------------------------------------------------------------------------------------------|-----|
| Supplementary Table I.1   Assembly statistics for <i>Callorhynchus milii</i> -6.1.3 .....                                                                      | 142 |
| Supplementary Table I.2   Types of interspersed repetitive sequences in the <i>C. milii</i> genome .....                                                       | 143 |
| Supplementary Table I.3   Proportion of callable genome, number of SNPs and Ti/Tv for the consecutive filters applied in the SNP calling. ....                 | 144 |
| Supplementary Table I.4   Comparison of heterozygosity value with other fish species. ....                                                                     | 145 |
| Supplementary Table I.5   Summary of duplication analysis in the <i>C. milii</i> genome.....                                                                   | 146 |
| Supplementary Table I.6   List of <i>C. milii</i> scaffolds with the number of duplications and the percentage of their sequence considered as duplicated..... | 147 |
| Supplementary Table I.7   <i>C. milii</i> genes covered by segmental duplication. ....                                                                         | 151 |
| Supplementary Table II.1   The average GC content and standard deviation of vertebrate genomes .....                                                           | 163 |
| Supplementary Table II.2   Tests of GC compositional homogeneity in <i>C. milii</i> genome ....                                                                | 164 |
| Supplementary Table II.3   Summary of isochores in <i>C. milii</i> genome.....                                                                                 | 166 |
| Supplementary Table II.4   Descriptive statistics of isochores in lizard, <i>C. milii</i> and stickleback.....                                                 | 168 |
| Supplementary Table II.5   Gene density of isochores in <i>C. milii</i> , lizard and stickleback, ...                                                          | 169 |
| Supplementary Table III.7   miRNA families present in elephant shark, mouse and human but lost in teleost fishes.....                                          | 170 |
| Supplementary Table IV.2   Overlap of human orthologous gCNEs with known functional elements in the human genome.....                                          | 171 |
| Supplementary Table IV.3   GeneOntology enrichment (molecular function section) of human genes associated with pan-gnathostome CNEs.....                       | 172 |
| Supplementary Table IV.4   GeneOntology enrichment (biological process section) of human genes associated with pan-gnathostome CNEs.....                       | 174 |
| Supplementary Table IV.5   Top 20 human genes with the highest number of pan-gnathostome CNEs.....                                                             | 175 |
| Supplementary Table IV.6   Top 20 <i>C. milii</i> genes with the highest number of gCNEs lost in teleosts.....                                                 | 176 |
| Supplementary Table IV.7   Top 20 <i>C. milii</i> genes with the highest number of gCNEs lost in tetrapods.....                                                | 178 |
| Supplementary Table V.1   Evaluation of alternate topologies for the 13-chordate dataset using CONSEL. ....                                                    | 180 |

|                                                                                                                                                                                                                          |     |
|--------------------------------------------------------------------------------------------------------------------------------------------------------------------------------------------------------------------------|-----|
| Supplementary Table VI.1   Relative rate tests of <i>C. milii</i> versus the other vertebrates using the 13-chordate protein dataset and sea lamprey as the outgroup. ....                                               | 181 |
| Supplementary Table VI.2   Two-Cluster tests using Lintre for the 13-chordate dataset.....                                                                                                                               | 182 |
| Supplementary Table VI.3   Takezaki Two-Cluster test using the 13-chordate dataset .....                                                                                                                                 | 183 |
| Supplementary Table VI.4   Pairwise distance to the outgroup (amphioxus) for the 13-chordate dataset.....                                                                                                                | 184 |
| Supplementary Table VII.1   Intron gain and loss in deep gnathostome lineages. ....                                                                                                                                      | 185 |
| Supplementary Table VIII.5   <i>C. milii</i> scaffolds showing one-to-one gene synteny with either chicken or human chromosomes but not corresponding to the 40 ancestral GLGs identified by Nakatani et al. (2007)..... | 187 |
| Supplementary Table VIII.6   <i>C. milii</i> scaffolds showing synteny with the macro and microchromosomes of chicken. ....                                                                                              | 188 |
| Supplementary Table VIII.7   Interchromosomal rearrangements in the medaka lineage.....                                                                                                                                  | 190 |
| Supplementary Table VIII.8   Interchromosomal rearrangements in the zebrafish lineage. .                                                                                                                                 | 192 |
| Supplementary Table IX.1   Top 100 protein domains in <i>C. milii</i> .....                                                                                                                                              | 194 |
| Supplementary Table IX.2   Protein domains uniquely present in <i>C. milii</i> .....                                                                                                                                     | 198 |
| Supplementary Table IX.3   Protein domains present in bony vertebrates but absent in <i>C. milii</i> . ....                                                                                                              | 199 |
| Supplementary Table IX.4   Protein domains present in <i>C. milii</i> and tetrapods but lost in teleosts.....                                                                                                            | 203 |
| Supplementary Table IX.5   Protein domains present in <i>C. milii</i> and teleosts but lost in tetrapods.....                                                                                                            | 204 |
| Supplementary Table X.1   List of major gene families involved in bone formation in vertebrates .....                                                                                                                    | 205 |
| Supplementary Table XI.1   Genes involved in antigen presentation.....                                                                                                                                                   | 215 |
| Supplementary Table XI.2   Pathogen receptors and intracellular signalling components ...                                                                                                                                | 216 |
| Supplementary Table XI.3   Intracellular pathogen receptors and inflammasome components .....                                                                                                                            | 218 |
| Supplementary Table XI.4   Genes involved in the complement system .....                                                                                                                                                 | 219 |
| Supplementary Table XI.5   Chemokines in <i>C. milii</i> .....                                                                                                                                                           | 222 |
| Supplementary Table XI.6   Chemokine receptors in <i>C. milii</i> .....                                                                                                                                                  | 224 |
| Supplementary Table XI.7a   Overview: Cytokines and interleukins in <i>C. milii</i> .....                                                                                                                                | 225 |
| Supplementary Table XI.7b   Interleukin and cytokine receptors .....                                                                                                                                                     | 227 |
| Supplementary Table XI.7c   Interleukins, cytokines and ligands.....                                                                                                                                                     | 230 |
| Supplementary Table XI.8   Tumour Necrosis Factor Ligand and Receptor Superfamilies .                                                                                                                                    | 233 |
| Supplementary Table XI.9   Lymphoid lineage determinants and regulators .....                                                                                                                                            | 237 |

|                                                                                                       |     |
|-------------------------------------------------------------------------------------------------------|-----|
| Supplementary Table XI.10   Genes involved in the apoptosis pathway .....                             | 244 |
| Supplementary Table XI.11   Vertebrate CD8 sequences used for phylogenetic analyses ...               | 246 |
| Supplementary Table XI.12   Vertebrate CD4 and related sequences used for phylogenetic analyses ..... | 249 |
| Supplementary Table XI.13   CD4/LAG3-related sequences in cartilaginous fishes.....                   | 254 |

**Note: The following supplementary tables are not part of this file and are presented as separate tables:**

|                                                                                                                        |
|------------------------------------------------------------------------------------------------------------------------|
| Supplementary Table III.1   miRNA gene loci identified in the <i>C. milii</i> genome                                   |
| Supplementary Table III.2   <i>C. milii</i> miRNAs that are located within intergenic regions                          |
| Supplementary Table III.3   <i>C. milii</i> miRNAs that are located within introns                                     |
| Supplementary Table III.4   <i>C. milii</i> miRNAs that are located within exons                                       |
| Supplementary Table III.5   <i>C. milii</i> miRNAs that are located in clusters                                        |
| Supplementary Table III.6   microRNAs that are enriched 20-fold over the median expression in other tissues            |
| Supplementary Table IV.1   Locations of gnathostome conserved noncoding elements (gCNEs) in the <i>C. milii</i> genome |
| Supplementary Table VIII.1   <i>C. milii</i> scaffolds showing synteny with human chromosomes                          |
| Supplementary Table VIII.2   <i>C. milii</i> scaffolds showing synteny with chicken chromosomes                        |
| Supplementary Table VIII.3   <i>C. milii</i> scaffolds showing synteny with medaka chromosomes                         |
| Supplementary Table VIII.4   <i>C. milii</i> scaffolds showing synteny with zebrafish chromosomes                      |
| Supplementary Table IX.6   Genes present in <i>C. milii</i> and tetrapods but lost specifically in teleost fishes      |
| Supplementary Table IX.7   Genes present in <i>C. milii</i> and teleost fishes but lost specifically in tetrapods      |
| Supplementary Table IX.8   <i>C. milii</i> genes with known homologs only in invertebrates                             |

## Summary of major findings

### Supplementary Note I. Genome sequencing, assembly and annotation

- The *C. milii* genome was sequenced from a single male individual to a depth of  $\sim 19.25\times$  using Roche 454 Titanium and ABI 3730 technologies and assembled using the CABOG 6.1 assembler. The total length of the contigs, N50 contig size and N50 scaffold size are 937 Mb, 46.6 kb and 4.52 Mb, respectively.
- In addition, RNA-seq data was generated from 10 tissues on an Illumina platform.
- The genome assembly is of high quality, as cumulative aligned coverage of 71 finished BACs was 94% with 0.16% base discrepancy.
- Interspersed repeats and low-complexity regions make up 28.2% and 1.8% of the genome, respectively.
- A total of 17,449 protein-coding genes were found in the genome assembly, with an additional 1,423 protein-coding genes predicted in RNA-seq transcripts.
- *C. milii* has a heterozygosity value of 0.00233 per bp, which is similar to that of another wild-stock species, the Atlantic cod (0.00209).
- Only 5.5 Mb of the *C. milii* genome resides on segmental duplications, which represents  $\sim 0.6\%$  of the genome.

### Supplementary Note II. GC content and isochores

- The *C. milii* genome is less heterogeneous in GC content than human, chicken and zebrafish, but more heterogeneous than lizard, *X. tropicalis*, fugu, stickleback and medaka.
- Approximately 46% of the genome is organized into isochores that are represented by only three families L2, H1 and H2 (average GC levels of 39.9%, 43.0% and 44.4%, respectively).

### Supplementary Note III. Characterization of miRNA genes in *C. milii*

- Through small RNA sequencing and homology searches, 693 miRNA gene loci were identified in the *C. milii* genome.
- Tissue-specific expression profiles of *C. milii* miRNAs are similar to those observed in zebrafish and other vertebrates.
- A total of 131 novel miRNAs were predicted in *C. milii*, seven of which are highly expressed in multiple tissues.
- The *C. milii* genome encodes a higher number of known miRNA families than sea lamprey, hagfish, zebrafish, *X. tropicalis* and chicken but fewer families than mammals, indicating that an expansion of miRNA families has occurred in mammalian lineages after the split from other vertebrates.
- 22 out of 136 miRNA families conserved in *C. milii* and mammals have been secondarily lost in teleost fishes. One of these, mir-150, is involved in B-cell development in mice and human while another one, mir-33, is known to regulate cholesterol metabolism in the liver and pancreas.



### Supplementary Note IV. Origin and evolution of conserved noncoding elements (CNEs) in vertebrates

- A total of 63,877 ‘gnathostome CNEs’ (average size of 271 bp) were identified based on whole-genome alignments of *C. milii* and 11 bony vertebrates.
- A subset of 1,687 gnathostome CNEs are conserved in all 12 gnathostome genomes. They are associated mainly with transcription factor, chromatin-binding and protein dimerization activity genes as well as with genes involved in central nervous system development.
- Less than 0.6% of gnathostome CNEs could be found in the sea lamprey, sea squirt and amphioxus. This indicates that the emergence of gnathostomes was accompanied by the recruitment of a massive number of CNEs and the assembly of novel gene regulatory networks built around them.
- The teleost ancestor had lost nearly eight times more gnathostome CNEs than the tetrapod ancestor, possibly due to the higher rate of nucleotide substitution in teleost genomes.

### Supplementary Note V. Phylogenomics of vertebrates

- Phylogenomic analysis of 699 strict one-to-one orthologues from 13 chordates (including *C. milii*) using Maximum likelihood and Bayesian Inference supported *C. milii* as a sister group to bony vertebrates with maximal support (Bootstrap percent 100 and Posterior Probability 1.0).
- Alternative topologies were rejected with high confidence (AU and NP values <0.03).
- The pattern of intron gains and losses provided independent unequivocal support for *C. milii* as a sister group to bony vertebrates.

### Supplementary Note VI. Rate of molecular evolution

- Relative Rate tests based on the genome-wide set of 699 orthologous protein-coding genes indicated that *C. milii* protein coding genes were evolving significantly slower than those of other vertebrates examined (p-value <0.01 for all comparisons), including the coelacanth.
- Two-Cluster tests provided further evidence that protein-coding genes of *C. milii* were evolving significantly slower than those of coelacanth, tetrapods, teleosts and sea lamprey (Z-stat:14.18, 10.93, 20.24 and 27.93, respectively; CP: 99.96%).
- Analysis of neutral evolutionary rates in four-fold degenerate sites indicated that the neutral evolutionary rate of *C. milii* is also the lowest for all vertebrates.

### Supplementary Note VII. Intron evolution in vertebrates

- Our analysis of approximately 40,000 intron positions in 3,603 sets of orthologous genes from *C. milii* and nine bony vertebrates is the most extensive study of intron-exon evolution in vertebrates to date.
- The vast majority of intron positions in conserved protein-coding regions are intact in the genomes of *C. milii* and all other vertebrates studied.

- The number of intron changes observed in the *C. milii* lineage since it diverged from the gnathostome ancestor is smaller than in any bony vertebrate lineage, which reflects the lower rates of molecular evolution in *C. milii*.
- Intron losses outnumbered intron gains in most of the branches with the exception of stickleback, in which gains (603) outnumbered losses (126). The gains and losses in the stickleback lineage are the largest recorded in any vertebrate lineage.

### Supplementary Note VIII. Large-scale synteny analysis

- 93% of *C. milii* scaffolds show conserved synteny with single chromosomes in chicken. Many *C. milii* scaffolds showing synteny with two or more human chromosomes correspond to single chicken chromosomes, highlighting instances of interchromosomal rearrangements in the human lineage.
- Seven novel syntenic relationships between chicken and human chromosomes were identified through analysis of one-to-one conserved syntenic blocks between *C. milii*, chicken and human.
- Synteny of many large blocks of genes in *C. milii* is extensively conserved in tetrapods. The largest block is a 10 Mb *C. milii* scaffold containing 148 syntenic genes that corresponds to a 45 Mb region on human chromosome 2.
- 82 of 86 *C. milii* scaffolds with homology to chicken microchromosomes show correspondence to a single chicken microchromosome each, suggesting that the chromosomal organization observed in *C. milii* and chicken represents the ancestral vertebrate form.
- A substantially higher number of interchromosomal rearrangements than previously known in the medaka and zebrafish lineages were identified by comparing *C. milii* scaffolds with medaka and zebrafish chromosomes.

### Supplementary Note IX. Evolution of protein domains and gene families

- The *C. milii* genome encodes the greatest proportion of proteins containing the immunoglobulin and B-box zinc finger domains of all bony vertebrates such as human and stickleback.
- Six protein domains present in *C. milii* and teleost fishes are lost in tetrapods, exemplified by the ‘sea anemone cytotoxic protein’ domain which is a part of actinoporins.
- We identified 34 genes that are present in *C. milii* and teleost fishes but lost specifically in tetrapods. These genes have functions related to an ancestral aquatic lifestyle, and include innate immune system genes, fin and lateral line development genes, and olfactory receptor genes.
- 271 genes present in *C. milii* and tetrapods are lost specifically in teleost fishes. Interestingly, 104 of these genes are associated with human genetic diseases, indicating their non-redundant functions in non-teleosts.
- There are 27 *C. milii* genes that are not present in bony vertebrates. These are ancient eukaryotic genes that are still retained in *C. milii* and some invertebrates but lost in bony vertebrates. One of these is the *isopenicillin N epimerase (Ipne)* gene, the first instance of the presence of a gene involved in antibiotic synthesis in a vertebrate. Another intriguing instance is the presence of a cephalotoxin-like gene in the *C. milii*

genome. A related gene has been reported only in the cuttlefish, *Sepia esculenta* and ESTs are found in the spiny dogfish and lungfish, indicating its limited distribution in vertebrate genomes.

- Surprisingly, *C. milii* has only six OR-like genes, which is the lowest number observed among all chordates.
- By contrast, the genome has a larger repertoire of vomeronasal receptor genes (4 V1R and 33 V2R genes) similar to that of teleost fishes.

### Supplementary Note X. Genes involved in bone formation

- Almost all genes known to be involved in the formation of bone are present in *C. milii*, except for a family of genes that encode the secretory calcium-binding phosphoproteins (SCPPs).
- Zebrafish contains a single bone-specific SCPP gene, *spp1* (*osteopontin*). Manipulation of the activity of this gene in zebrafish using morpholinos and CRISPR/Cas9 system resulted in the reduction of bone formation, supporting the hypothesis that the absence of this gene family in cartilaginous fishes explains the absence of ossified endoskeleton.

### Supplementary Note XI. Analysis of the immune system of *C. milii*

- The presence of elaborate innate immune functions in *C. milii* is supported by an essentially modern form of the complement system, a diverse repertoire of pathogen receptors, such as TLR- and NOD-like receptors and intracytoplasmic helicases, upstream and downstream effectors of the inflammasomes, and the basic components of the interferon system; a notable exception is the apparent lack of a TLR4-related receptor and associated components of this signalling pathway among the ten identifiable TLR-like genes.
- The immunoglobulin (Ig) genes are in the cluster-type organization, TCR genes are found in the typical translocon organization. Ig heavy (H) genes are linked to TCR loci, likely an ancestral feature of antigen receptors.
- The presence of four MHC paralogous groups in the *C. milii* genome is compatible with two rounds of genome duplication in the ancestor of gnathostomes.
- Consistent with the lack of lymph nodes and germinal centres as well as the relatively long lag-time required to generate humoral immunity, the genes encoding the mammalian regulators of secondary lymphoid tissue formation, TNFRSF3 (LT $\beta$ R) and its ligands (TNFSF1 [LT $\alpha$ ] and TNFSF3 [LT $\beta$ ]) are absent from the *C. milii* genome, as is a critical cytokine of follicular helper T cells, IL21. By contrast, key determinants of formation and function of spleen (such as HOX11) and thymus (FOXP1) regulating differentiation of thymic epithelial cells, and AIRE, a key regulator of central tolerance) are present.
- All hallmarks of the cytotoxic CD8 lineage of T cells are present in the *C. milii* genome.
- Surprisingly, however, despite the presence of polymorphic MHC class II and invariant chain genes, a bona fide *CD4* gene is absent, as are genes encoding transcription factors regulating the differentiation of several T helper lineages and several of their key effector cytokines.

- The gene encoding FOXP3, the essential regulator of the CD4<sup>+</sup> regulatory T (T<sub>reg</sub>) cells, while present, lacks the structural hallmarks of its mammalian orthologues; in support of the lack of bona fide T<sub>reg</sub> cells, the gene encoding IL2, a key regulator of T<sub>reg</sub> cells in mammals, and its specific receptor, IL2RA are absent.
- The genes encoding cytokines of the T helper lineage (IL4, IL9, IL13, IL17E/IL25, IL31) are absent from an otherwise seemingly modern complement of interleukin genes, whereas the gene encoding IFN $\gamma$ , a classical Th1 cytokine, is present in *C. milii* and nurse shark.
- Several members of the IL10 family of anti-inflammatory cytokines are encoded in the in *C. milii* genome, suggesting that the balance between pro- and anti-inflammatory functions can be achieved without a dedicated regulatory T cell subset.
- *RORC*, the gene encoding ROR $\gamma$ t, and genes encoding IL23 and IL23RA, which potentiate Th17 responses, are not present in cartilaginous fishes, suggesting that T<sub>H</sub>17 cells are not present; thus, in cartilaginous fish IL17 and IL22 might be furnished by non-lymphoid cells.
- The lack of the ROR $\gamma$ t transcription factor suggests that cartilaginous fishes might only possess group 1 innate lymphoid cells.

## Supplementary Note I. Genome sequencing, assembly and annotation

### I.1 Sequencing and assembly

The elephant shark (*Callorhynchus milii*) DNA for shotgun sequencing, and for the bacterial artificial chromosome (BAC) library, is derived from the testis of a single male caught in Hobart, Tasmania, Australia. All sequences were generated on the Roche 454 Titanium instrument with the exception of the BAC-end, fosmid-end and plasmid-end sequences that were generated on the ABI3730 instrument (Institute of Molecular and Cell Biology (IMCB), Biopolis, Singapore; and Craig Venter Institute (JCVI), Rockville, MD). Sequenced genome coverage for each read type is as follows: BAC End Sequences, 0.10×; 40kb fosmid, 0.02×; 3-4kb plasmids, 1.38×; 454 Fragment, 11.26×; 454 3kb, 4.0×; and 454 8kb, 2.49×. The approximate average depth of coverage is 19.25× and the approximate estimated size of the genome is ~1 Gb.

Assembly version 6.1.2 was built with all sequence data, using the CABOG 6.1 assembler<sup>38</sup>. Post assembly, sequences of 71 finished BACs (NCBI 20/4/2011) were merged into the 6.1.2 assembly. The top scaffold that each BAC mapped to was identified by MEGABLAST (-e 1e-20 -W 200 -p 98). Contigs of the top scaffold that the BAC mapped to were identified by BLASTN (-W 150 -F F). A Perl script was used to create a new contig for each BAC, extend the contig if the 5' and 3' overlapping contigs were longer than the BAC sequence and adjust flanking gaps accordingly. We then sorted scaffolds by decreasing length, assigned new sequence identifiers to contigs and scaffolds, and extended 20-bp and 50-bp gaps to 100-bp as per NCBI's guidelines. This Whole Genome Shotgun project has been deposited at DDBJ/EMBL/GenBank under the accession AAVX00000000. The version described in this paper is the second version, AAVX02000000. In the final assembly, referred to as *Callorhynchus\_milii*-6.1.3, there were 5,393 contigs with an N50 contig length of 46.6 kb (**Supplementary Table I.1**). There were 60 scaffolds with the N50 scaffold length of 4.52 Mb. A total of 937 Mb was assembled in contigs. The overall repeat content is 28%, ~3 times higher than that in similar size genomes of chicken and turkey (~10%)<sup>39,40</sup>.

### RNA sequencing (RNA-seq) and transcript assembly

For more accurate gene annotation of the reference assembly we have generated RNA-seq from 10 tissues of *C. milii* (brain, gills, heart, intestine, kidney, liver, muscle, ovary, spleen and testis) and assembled them into transcripts. In addition, RNA-seq was generated from the thymus and spleen of nurse shark (*Ginglymostoma cirratum*), an elasmobranch.

Total RNA was extracted using the TRIzol reagent (Invitrogen, Carlsbad, USA), treated with DNase (TaKaRa Bio Inc, Shiga, Japan) and purified using RNeasy Mini Kit (QIAGEN, Hilden). DNase-treated total RNA was subjected to polyA selection using DynaBeads Oligo dT (Invitrogen, Carlsbad, USA). The polyA selected RNA was used to prepare a strand-specific RNA-seq library using the Script-Seq mRNA preparation kit (Epicentre, Madison, USA) as per the manufacturer's protocol with the following modification: Phusion polymerase (NEB, Ipswich, USA) was used in place of Epicentre's FailSafe PCR mix. The library was purified with QIAGEN MinElute PCR purification kit (Qiagen, Valencia, USA) and eluted with 11  $\mu$ L Elution Buffer. The quality and quantity of the library was analyzed on an Agilent 2100 Bioanalyzer. The library was diluted to a concentration of 8 pM. Cluster generation was performed on a cBOT machine. Each library was paired-end sequenced ( $2 \times 76$  cycles) in at least two lanes of the Illumina GAIIx platform according to the manufacturer's specifications. The *C. milii* and *G. cirratum* RNA-seq data were submitted to SRA under accession numbers SRA054255 and SRA062964, respectively.

Illumina reads for each tissue were assembled *de novo* using Trinity version r2011-07-13<sup>41</sup>. Trinity transcripts  $\geq 350$  bp from each tissue were processed to remove mitochondrial sequences, anti-sense transcripts and transcripts with frameshifts. Mitochondrial sequences were identified by BLASTN search of the transcripts against *C. milii* mitochondrion genome (GenBank HM147137.1). Anti-sense transcripts and transcripts with frameshifts were identified by BLASTX search ( $1 \times 10^{-7}$  cut-off) against NCBI RefSeq database. The BLASTX result was also used to classify transcripts as protein-coding ( $< 1 \times 10^{-7}$ ) or non-coding ( $> 1 \times 10^{-7}$ ). Only the longest transcript of each Trinity component was retained for both categories. Transcripts with  $\geq 80\%$  protein coverage are considered full-length, while transcripts with  $< 80\%$  protein coverage are considered partial transcripts.

In addition to *de novo* assembly of the reads using Trinity, the reads were also assembled onto the *C. milii* genome assembly using Tophat (version 1.3.1)<sup>42</sup>; and Cufflinks<sup>43</sup>. First, Illumina RNA-seq reads for each tissue were aligned to the genome assembly using Tophat. The following parameters were used for Tophat alignment: --library-type fr-secondstrand --mate-inner-dist 140 --max-intron-length 100000 --min-intron-length 50. Next, Cufflinks was used to assemble the spliced fragment alignments derived from the Tophat step. The

following parameters were used for Cufflinks assembly of the transcripts: --multi-read-correct --library-type fr-secondstrand --max-intron-length 100000 --min-intron-length 50 --pre-mrna-fraction 0.5 --overhang-tolerance 0 --min-isoform-fraction 0.3. Finally, the Cufflink transcripts were processed in the same way as the Trinity transcripts.

### Genome assembly quality evaluation

To assess the structural accuracy of the assembly, we analyzed the alignments of the 8.1Mb of finished *C. milii* BAC clone sequence against 67,833 contigs from 21,219 scaffolds of assembly version 6.1.2. Cumulative aligned coverage of 71 BACs was 94%. Overall high quality base discrepancy (SNPs) was 0.16% that translates to 1 SNP per 669 bases. No order discordances (misordered sequence contigs within a supercontig) were observed. For all assembly contigs the cumulative aligned sequence coverage for all BACs (8.1Mb) was 90%. We estimated coverage of the *C. milii* genome by aligning 6,778 *C. milii* full-length cDNAs (GenBank accession numbers JX052268-JX053440 and JX207142-JX212746) to the assembly using BLAT with default parameters. 88% of these sequences aligned over  $\geq 90\%$  of their length and 93% aligned over  $\geq 80\%$  of their length.

### Identification and annotation of repetitive sequences

RepeatScout (using 16-mer frequencies) and PILER-DR (default  $>94\%$  identity,  $>400$  bp) were run on the 30 longest scaffolds of the assembly (total 330 Mb). In addition, proteins encoded by LINES, DNA transposons and LTR elements were obtained from RepBase and NCBI and searched against the entire assembly using TBLASTN ( $-e 1e-3 -F "m S"$ ) to identify genomic regions that are potential interspersed repeats. The results from the RepeatScout, PILER-DF and TBLASTN analyses were clustered together with known *Callorhinchus* repeats<sup>44</sup>, using CDHIT-EST at minimum 94% identity and 90% coverage of shorter sequence ( $-l 100 -c 0.94 -aS 0.9 -G 0 -r 1$ ). For each cluster that was not represented by a known *Callorhinchus* repeat, sequences were oriented to the same strand as the representative sequence and aligned using DIALIGN (with translation to peptide segments and masking of unaligned bases) to obtain consensus sequences. The consensus sequences were filtered of protein-coding genes (using BLASTX against NR at  $E < 0.01$ ), simple repeats (using trf, nseg and mdust), known *Callorhinchus* repeats (RepeatMasker  $< 20\%$  or 200 unmasked bases) and low-copy number repeats (sequences that occurred fewer than 10 times at minimum 50% coverage in the *C. milii* genome using RepeatMasker). A total of 88 novel interspersed repeats remained. The low-complexity regions were identified using

DUST. Based on these analyses, *C. milii* contains 28.2% interspersed repeats and 1.8% low-complexity repeats. The types and extent of interspersed repeats are given in **Supplementary Table I.2**.

## I.2 Ensembl genome annotation

### *Conceptual translations from C. milii transcripts*

Conceptual translations of Trinity and Cufflinks transcripts were obtained by predicting open reading frames based on BLASTX results against RefSeq vertebrate proteins, and GenBank proteins of *Chondrichthyes* and *Petromyzon marinus* at  $E < 1e-3$ . The conceptual translations were clustered at 100% identity,  $\geq 25$  amino acids using CDHIT, to reduce redundancy across tissue types and assembly methodology. The conceptual translations were searched against vertebrate proteins using BLASTP  $E < 1e-3$  to calculate protein coverage and “length ratio” (length of *C. milii* protein to length of Refseq protein). Conceptual translations that had  $\geq 80\%$  coverage of top BLASTP hit or  $\geq 40\%$  coverage with  $\geq 65\%$  length ratio, were selected for building genes in the Ensembl pipeline. These transcripts were submitted to NCBI under accession numbers JW861113-JW881738, KA353634-KA353668 (BioProject ID PRJNA168475).

### *Protein-coding genes*

The genome was masked using RepeatMasker with the parameters “-s -nolow” and a combined library of 3,109 repetitive elements obtained from RepBase (RepeatMasker edition; release 20110419) (repeats from human, chicken, *Xenopus tropicalis*, zebrafish, medaka, fugu and *Chondrichthyes*), and 88 novel repetitive elements identified in the *C. milii*.

*C. milii* proteins (192 obtained from NCBI; and  $\sim 65,000$  conceptual translations derived from RNA-seq data) were searched against the genome assembly using Pmatch, while  $\sim 126,000$  RefSeq vertebrate proteins (from human, opossum, platypus, chicken, *Xenopus tropicalis*, medaka, zebrafish, other *Chondrichthyes*, *Petromyzon marinus*) and  $\sim 105,000$  RefSeq invertebrate proteins (*Branchiostoma floridae*, *Ciona intestinalis*, *Strongylocentrotus purpuratus*, *Drosophila melanogaster*, *Caenorhabditis elegans* and *Nematostella vectensis*) were searched against the genome assembly and *ab initio* Genscan predictions using BLAST. Gene models were built using Genewise and Exonerate, and the best prediction per query



protein selected from either algorithm using the ‘BestTargetted’ module in the Ensembl pipeline. Gene models were selected based on the following priority criteria: firstly *C. milii* proteins, secondly vertebrate proteins and lastly invertebrate proteins, using the ‘LayerAnnotation’ module. UTRs were added to the gene models using transcripts obtained through RNA-seq. A total of 17,449 protein-coding genes (26,799 transcripts) and 260 pseudogenes were predicted that were located on 2,954 scaffolds. Half of the protein-coding genes were located on scaffolds that had at least 53 genes, permitting us to carry out long-range gene synteny analysis. In addition to Ensembl prediction, we identified 1,423 unique protein-coding sequences based on RNA-seq transcripts that are either partial or missing in the genome assembly.

#### *Non-coding RNA genes*

Non-coding RNA genes were predicted by BLAST and Infernal search against Rfam 10.0 and miRBase 17.0. microRNAs were predicted using miRDeep on small RNA sequences (obtained on Illumina platform) and added to those found through homology. The small RNAs predicted by the Ensembl include 747 miRNA, 215 snoRNA, 77 snRNA and 46 rRNA.

#### **Elephant Shark Genome Browser**

Annotation of the *C. milii* genome was carried out using version 59 of the Ensembl annotation pipeline code. The annotation is hosted on the website <http://esharkgenome.imcb.a-star.edu.sg/>.

#### **I.3 SNP calling**

For SNP calling, we retained positions covered by at least two read alignments bearing the same high-quality (Phred score > 27) mutation relative to the assembly. Repetitive and multi-allelic (> 3) sites were ignored. In addition to these criteria, we specifically explored several combinations of other quality-related filters, such as imposing different thresholds of coverage, allele balance, strand bias, minimum distance to an indel or between variants. We used the transition/transversion ratio to assess the quality of each filter. We concluded that, in our data, the optimal SNP calling results from a combination of five criteria: (i) we considered only scaffolds larger than 50 Kb, (ii) we excluded duplicated sequence (being conservative, in this case we took as duplicated all segments with more than 4 windows that

have a normalized mean coverage higher than 3, instead of 10 windows), (iii) we imposed that any site should be covered by 5 to 15 reads; (iv) we discarded indel regions (defined as follows: first, for each read we merged the segments of its indels and their 5 bp flanking regions; second, we discarded fragments that are supported by only one read) and (v) SNPs should be separated by a minimum distance of three bp.

Applying the described SNP calling, we discovered 402,090 SNPs in a callable genome of 172,697,509 bp (~18% of the genome), with a transition/transversion ratio of 1.87. If we account for only the coding sequence, the transition/transversion ratio increases to 3.03 (**Supplementary Table I.3**).

#### **I.4 Heterozygosity**

The proportion of SNPs in the callable genome would give us an estimation of the overall heterozygosity present in that species. We found that the global heterozygosity is 0.00233 per bp. We also calculated the heterozygosity per bp in 1-kb windows of callable sequence, and the median heterozygosity for all windows is 0.002 (**Supplementary Fig. I.1**). Finally, we plotted the distribution of the mean heterozygosity in 100 windows across the assembly and conclude that the heterozygosity is homogeneous across the entire genome with no traces of inbreeding and runs of homozygosity (**Supplementary Fig. I.2**).

Polymorphism data are currently available for other fishes such as the medaka and the Atlantic cod genomes<sup>45,46</sup>. Kasahara et al. identified SNPs in medaka fish by comparing genomic sequences of two individuals from inbred lines representing two different populations in Japan (coverages were 10.6× and 2.8×, respectively), which allowed them to identify 16.4 million SNPs. Star et al. (2011) sequenced a single heterozygous male Atlantic cod to 40× coverage using 454 reads. One million SNPs were obtained by mapping 454 and Illumina reads to the assembly generated. The authors selected SNPs where 3 reads shared polymorphism and with no additional SNPs in a 5-bp window on either side of the SNP position. They combined the number of SNPs from 454 (603,555 SNPs) and Illumina (873,847 SNPs) reads to obtain a total of 1,047,875 SNPs (429,527 of them were common).

The heterozygosity we estimated for *C. milii* is not strictly comparable to the polymorphism reported for medaka fish because two individuals derived from different inbred lines

representing different populations were used. This is likely to explain the high number of SNPs cataloged. However, the use of a single individual makes our heterozygosity estimates more comparable with those obtained for the Atlantic cod, and we found that both vertebrates have similar values of heterozygosity (**Supplementary Table I.4**).

### I.5 Segmental duplication

Structural variation and gene duplications are thought to have a profound effect on phenotypic adaptations in humans and other vertebrates. It has long been argued that segmental duplications have played a significant role in gene and genome evolution. We explored the extent and quality of segmental duplications (> 10 Kb and > 94% identity) in the *C. milii* genome assembly.

#### *Method*

Our analyses were restricted to the non-repetitive portion of the genome or repetitive regions with higher divergence that allowed us to map the reads uniquely. We made use of the raw read data that was used to assemble the genome (33,281,009 reads sequenced on Roche 454 platform, that represent a raw coverage of 17.60× of the assembly after removal of the TCAG key sequences of each read). First, we explored the read length and quality distributions in order to incorporate into our analyses the major proportion of long high-quality reads (**Supplementary Fig. I.3**) and retained only reads longer than 200 bp (32,629,870 reads). As expected, the qualities values per cycle are predominantly low at the end of the reads (data not shown).

Reads were mapped to a soft-masked version of the genome via local alignments with megaBLAST (parameters -D 3 -p 94 -F m -U T -s 220 -R T)<sup>47</sup>. To improve the accuracy of the alignments around indels, we realigned each pair of aligned sequences using an optimal global alignment algorithm. Finally, we kept the alignments that fulfilled the following criteria: (i) a sequence identity higher than 94%, (ii) alignment length  $\geq$  200 bp, (iii) at least 100 bases in non-repetitive regions, (iv) at least 100 bases with Phred scores  $\geq$  27 and (v) a proportion of aligned bases relative to the read length of at least 40%.

With the final mappings, 67% of the non-repetitive genome (45% of the whole genome) is covered with 5 to 15 reads (**Supplementary Fig. I.4**). Note that the reduction of coverage

from the initial 17.60× coverage results from the use of high-quality local alignments only. On the other hand, the vast majority of reads are almost identical to the reference genome as expected. Not surprisingly, longer scaffolds are more similar to the mapped reads (**Supplementary Fig. I.5**).

#### *Duplication analysis*

We screened the elephant shark assembly for segmental duplications using the whole genome shotgun sequence (WSSD) approach<sup>48</sup>. This strategy is based on finding genomic fragments with an excess of read depth by, (1) estimating the number of copies of the sequences in the assembly, based on the fact that regions with a higher copy number will translate into a higher sequencing coverage, (2) partitioning the genome into segments with significantly the same copy number and, (3) selecting as duplications those segments with a remarkably high number of copies and larger than approximately 10 Kb. More precisely, scaffolds were split into windows of 1 kb of non-repetitive sequence and for each window we calculated the mean coverage from the per-base coverage values. For all windows, mean coverage values were normalized by subtracting the mean coverage across windows and<sup>49</sup> dividing by its standard deviation calculated exclusively from those windows with mean coverage lower than 20× (in order to avoid potentially hidden repeats that would inflate the coverage) (**Supplementary Fig. I.6**). The R package DNACopy was then applied with the default parameters in order to, firstly, smooth possible outlier windows with mean coverage notably different from adjacent windows and, secondly, segment the genome into intervals of markedly different mean coverage. For the resulting intervals (n=17,711), we applied parameters previously used<sup>50,51</sup> and selected as duplications those intervals with more than 10 windows (i.e. at least 10 Kb of non-repetitive sequence) and an interval median for the normalized mean coverage larger than three, which corresponds to more than 3 standard deviations from the empirical distribution of mean coverage across windows.

Overall, we estimated a total of 5.5 Mb residing on duplications, which represents ~0.6% of the genome (**Supplementary Table I.5**). In terms of length, half of the duplications were shorter than 30 Kb and <1% of the duplications were longer than 100 Kb (data not shown). The distribution of duplications was not homogeneous across scaffolds. Only 0.9% of the scaffolds harbored at least one duplication and, of these, there was an excess of scaffolds almost totally duplicated: out of the 161 scaffolds harboring at least one duplication, 154 (96%) had more than 90% of their sequence duplicated (**Supplementary Fig. I.7a**); however,

this was mainly restricted to the shortest scaffolds (**Supplementary Fig. I.7b**). A list of scaffolds with the number of duplications and the percentage of their sequence considered as duplicated can be found in the **Supplementary Table I.6**.

Thus, we aimed at identifying genes that have expanded in the elephant shark genome. Duplicated genes were identified by looking for genes that completely or partially overlap segmental duplications. Of the 18,808 genes (including protein-coding and RNA genes) predicted in the *C. milii* assembly, we found a total of 265 genes as being completely (245 genes) or partially (20 genes) covered by segmental duplications, which altogether represents ~1.4% of the genes (see **Supplementary Table I.7**). However, we note that most of the completely duplicated genes are located on short scaffolds, and hence might be an artifact of the fragmented state of the assembly.

### **I.6 Identification of potential sex-chromosome**

Very little work has been done on sex-determining mechanisms in chondrichthyans (cartilaginous fishes). Analysis of karyotypes in elasmobranch cartilaginous fishes has suggested that male heterogamy is the major sex-determining mechanism<sup>52</sup>. To verify if male is indeed the heterogametic sex in *C. milii*, we mapped 454 fragment reads to the assembly using BLAT and counted average fold sequence coverage for each scaffold. Our expectation was that assembled scaffolds linked with the X and Y chromosome would be present with half the expected coverage. However, no such scaffolds were identified. Our large-scale synteny analysis has shown that many genes on *C. milii* scaffold\_2 (17 Mb) have orthologues on the human X chromosome. If scaffold\_2 were indeed associated with X chromosome in *C. milii*, the observed sequence coverage of 8.36 for scaffold\_2 compared to 8.38 for all scaffolds suggests that the male sex chromosomes are not heterogametic in *C. milii*. Further analysis will be needed to resolve the origin of sex chromosomes and associated questions about the sex determination mechanism in *C. milii*.

## Supplementary Note II. GC content and isochores

### II.1 Methods

We obtained average GC content for the entire *C. milii* genome using UCSC tool 'faCount'. To determine if the genome is heterogeneous in GC content, we calculated the standard deviation of GC content by first computing the GC content in non-overlapping 3-kb windows on all scaffolds. Windows that had >20% missing bases were discarded. To compare the level of GC heterogeneity of the *C. milii* with that of other vertebrates, this process was repeated for the genomes of human (GRCh37 assembly), chicken (WASHUC2), lizard (AnoCar2), *X. tropicalis* (JGI v4.2), zebrafish (Zv9), medaka (MEDAKA1), stickleback (BROADS1) and fugu (FUGU5). Note that the assemblies of *Xenopus* and fugu are available in the form of scaffolds whereas the others are in chromosomes.

To determine if GC content was heterogeneous at the individual scaffold level, we applied the method described by Fujita et al.<sup>53</sup> for the green anole lizard genome. We first segmented the scaffolds into 300-kb non-overlapping regions and further segmented each region into fifteen 20-kb windows. Windows that had >20% missing bases were discarded, along with their encompassing region. GC content was computed for the remaining windows. Kruskal-Wallis test was conducted on each scaffold to determine if the mean ranks of the groups of windows were significantly different ( $P < 0.05$ ), which would indicate that there is GC content heterogeneity in that scaffold.

Previously, Fujita et al.<sup>53</sup> searched for isochores in the lizard genome and found that it contained few isochores, and these isochores made up only ~20% of the genome, a proportion that was much less than other tetrapods like human (71%) and chicken (54%). We applied the method used by Fujita et al.<sup>53</sup> to identify isochores in *C. milii*, and additionally in lizard and stickleback genomes for comparative purposes. We ran a Bayesian algorithm that infers isochore structure from DNA sequence and a Monte Carlo expectation-maximization algorithm that infers the hyperparameters of the isochore model<sup>54</sup>, namely the distribution of the isochore length in each isochore family ( $\lambda$ ), transition matrix of isochore families ( $P$ ), the prior distribution of the isochore mean per family ( $\eta$ ) and the prior distribution of the segment variances ( $a$ ,  $b$ ). To facilitate our comparison with previously published findings<sup>53</sup>, we used the same average GC contents (for  $K=2$  families,  $\eta=(0.35, 0.45)$ ; for  $K=3$ ,  $\eta=(0.37, 0.44, 0.50)$ ; for  $K=4$ ,  $\eta=(0.39, 0.44, 0.48, 0.53)$ ), and initial transition probabilities of the hidden Markov model (0.1 for each family). We ran this algorithm for 100 iterations, each time doing 100 simulations on the isochore model. The algorithm

identified putative isochores and classified them into specific families with an average GC content and coordinates along the scaffold or chromosome. These putative isochores were merged into larger ones, whenever adjacent regions belonged to the same isochore family. To determine if these putative isochores were homogeneous in GC content with respect to the rest of the scaffold/chromosome, one-tailed F-tests were carried out to compare the variances of the GC content of 3-kb windows in each putative isochore to that of the windows of the entire scaffold or chromosome. Prior to the F-test, arcsine-transformation was carried out on the GC-values to adjust for the non-normality of the data. Bonferroni-corrected P-values were computed, and putative isochores that were longer than 300 kb (based on the classical definition of isochores) and had GC variances less than the scaffold/chromosome on which they resided (P-value < 0.05) were classified as long homogeneous isochores.

To correlate gene density with isochore families, we used the genomic locations for all protein-coding genes of lizard and stickleback from Ensembl database (release 68) and genomic locations of *C. milii* genes from our own gene set. We carried out an overlap analysis of the isochores against genic regions based on genomic coordinates, and calculated the total amount of overlap relative to the total amount of isochoric sequence in each isochore family to obtain the gene density.

## II.2 Results

The average GC content of the *C. milii* genome is 42.3%, comparable to the GC content of tetrapods (39.9 – 41.3%) (**Supplementary Fig. II.1** and **Supplementary Table II.1**).

Compared to tetrapods, teleost fish genomes display more variation in their GC content (36.6 – 45.5%). The order of the genomes based on decreasing heterogeneity (decreasing standard deviations) is human, chicken, zebrafish, *C. milii*, fugu, *X. tropicalis*, stickleback, medaka and lizard (**Supplementary Table II.1**).

To determine whether GC content was homogeneous in individual scaffolds of *C. milii*, we analysed the scaffolds larger than 4 Mb, which is approximately the N50 scaffold size. There are 70 such scaffolds (total 532.0 Mb). **Supplementary Table II.2** shows the results of the Kruskal-Wallis tests conducted on the GC contents of groups of 20-kb windows in 300-kb regions. There is indeed heterogeneity in GC content across 61 of 70 scaffolds, showing that the *C. milii* genome is heterogeneous not only at the genome level, but also at the scaffold level.

We searched for isochores in *C. milii* scaffolds. Isochores are defined as genomic regions that are greater than 300 kb with reasonably homogeneous GC composition<sup>55</sup>. These isochores can be classified into a few families of characteristic GC levels and are reported to be linked to basic biological properties such as gene density, replication timing and recombination<sup>56</sup>. However, the complement of isochore families differs in various vertebrates. For example, human genome has five isochore families: L1, L2, H1, H2 and H3 with mean GC content of 36.0%, 38.9%, 43.1%, 48.7% and 54.5% respectively<sup>55</sup>, while the relative abundance of each of these families differ in the chicken genome, with an underrepresentation of L1 family, and the presence of a high-GC H4 family. On the other hand, teleost fishes have at most 2 isochore families. For instance, zebrafish has L1 and L2 families while stickleback and *Tetraodon* have H1 and H2 families<sup>57</sup>.

We ran a Bayesian algorithm<sup>54</sup> to identify isochores in *C. milii*, lizard and stickleback, with the latter two genomes included for comparison. We determined the most appropriate number of isochore families (K) by carrying out likelihood ratio tests of the likelihood values returned from the final iterations of the algorithm using different models with K=2 to K=4. For *C. milii* and lizard, K=3 was accepted (chi-squared test P-value < 0.05) in more than half of *C. milii* scaffolds (13/20) and all lizard macrochromosomes respectively, whereas for stickleback, K=2 was accepted (chi-squared test P-value < 0.05) in more than half of the linkage groups (12/21). Putative isochores identified by the algorithm were post-processed to identify isochores that are >300 kb and possess higher GC homogeneity than the rest of the scaffold or chromosome in which they reside. In *C. milii*, 246 isochores were identified (**Supplementary Table II.3**). These isochores make up 244.3 Mb in total, 46% of the total 532 Mb in the 70 scaffolds analysed. In lizard, 470 isochores were identified (data not shown), approximating the number identified by Fujita et al.<sup>53</sup>. The lizard isochores total 235.3 Mb and make up 22% of the 1,082 Mb analysed. In stickleback, 71 isochores were identified (data not shown). These isochores made up 232.4 Mb, 58% of the 401 Mb genomic sequences analysed. The isochore families, their average GC levels and relative proportions among all isochoric regions in *C. milii*, lizard and stickleback are shown in **Supplementary Table II.4**.

To determine if there is an overrepresentation of protein-coding genes in isochoric regions of high GC content, we compared the genomic locations of isochores and protein-coding genes. The density of genes in H1 isochores is higher than that in L2 isochores in both *C. milii* and lizard (**Supplementary Table II.5**). However, there is no increase in the abundance of genes



in H2 isochores compared to H1 isochores of *C. milii*. The gene density does not show an increase in the H2 isochores of stickleback compared to H1 isochores, which is in contrast to the results of Costantini et al.<sup>55</sup>, possibly due to the difference in methods used.

In summary, the *C. milii* genome is more heterogeneous in GC content than the bony vertebrate genomes investigated, except for human, chicken and zebrafish. There are 246 isochores in the 70 largest scaffolds of the *C. milii* genome. The amount of isochoric sequence in this sample of the genome suggests that isochores make up ~46% of the entire *C. milii* genome. The isochores in the *C. milii* genome fall within only three families: L2, H1 and H2 (average GC levels of 39.9%, 43.0% and 44.4% respectively) with L2 and H1 families accounting for most of the isochoric sequence (73% and 25% respectively).

### Acknowledgements

We thank Prof. Paul Fearnhead and Dr. Matthew Fujita for kindly providing R package and scripts respectively to carry out the identification of isochores.

## Supplementary Note III. Characterization of miRNA genes in *C. milii*

### III.1 Methods

#### *Small RNA library preparation and sequencing*

Small RNA libraries were prepared with the “Small RNA v1.5 Sample Prep Kit” following the manufacturer’s instructions (Illumina, San Diego, CA). Briefly, total RNA was isolated by Trizol extraction. The RNA was ligated with 3’ RNA adapter which is specifically modified to target microRNA (miRNAs) and other small RNAs that have a 3’ hydroxyl group resulting from cleavage by Dicer and other RNA processing enzymes, and then with 5’ RNA adapter at the 5’ end of RNAs with a phosphate group. Reverse transcription followed by PCR was performed to select for adapter-ligated fragments. The double-stranded DNA libraries were size-selected by PAGE purification (6% TBE PAGE). Libraries were prepared either for single-plex or multiplexed runs. For multiplexed libraries, specific barcode sequences were incorporated into the RNA adapters and comprised the first 4 bases sequenced. Libraries were either loaded singly or pooled (n=4) at a concentration of 8 pM on an Illumina Genome Analyzer Iix and sequenced for 36 cycles following the manufacturer's protocols.

#### *Data Analysis*

The image analysis and base calling were done using Illumina's RTA Pipeline and sequence files were generated for each sample. Pre-processing was performed using the Biopieces (<http://www.biopieces.org>) package. First, adapter sequences were trimmed with the `remove_adapter` script, sequences were further filtered by length (between 20 to 24 nt) and unique sequences were counted to produce the mature miRNAs sequences. Multiplexed samples were demultiplexed using custom Perl scripts. Next, miRDeep (version 2)<sup>58</sup> and miRBase Release 19<sup>59</sup> were used in combination with the *C. milii* genome assembly to predict known and novel miRNAs. A miRDeep score cutoff of 1.0 was used and 548 non-overlapping miRNA genes were predicted in the genome assembly. Potential miRNAs that were not expressed in the tissues examined were predicted by homology search with BLASTN analysis (e-value 1e-03). The tissue expression of miRNA was quantified using the quantifier script of the miRDeep package and then counts were quantile-normalized with Matlab (MathWorks, Natick, MA). The miRNA sequences reported have been deposited in GenBank under accession numbers JX994303 - JX994995.

### III.2 Results

Three groups of small RNAs have recently emerged as key regulators of gene expression in eukaryotes. These include microRNAs (miRNAs), short interfering RNAs (siRNAs) and Piwi-associated RNAs (piRNAs). miRNAs are short single-stranded RNAs that regulate gene expression post-transcriptionally by destabilizing or inhibiting efficient translation of mRNAs. Both siRNA and piRNA are involved in silencing of transposons. Among these, miRNAs are unusual in that they are continuously added on in each lineage and once they become part of a gene regulatory network, they are rarely secondarily lost in the descendant lineages<sup>60,61</sup>. The dramatic expansion of miRNA families in bilaterian animals and their stabilizing role in gene regulatory networks has led to the suggestion that they are instrumental in the evolution of organismal complexity<sup>62,63</sup>. Analysis of miRNA families in vertebrates have shown that a majority of miRNAs found in gnathostomes evolved in the stem vertebrate lineage before the divergence of jawless vertebrates and gnathostomes, and that their expression patterns in the shared major tissues are conserved in the two lineages<sup>60</sup>. The largest number of miRNAs cloned to date from chondrichthyans (cartilaginous fishes) is that of the catshark (*Scyliorhinus canicula*), and includes 107 miRNAs belonging to 91 families<sup>60</sup>.

Small RNA libraries of *C. milii* were cloned from brain, blood, eye, gills, heart, intestine, kidney, liver, muscle, ovary/uterus, pancreas, rectal gland, skin, spleen, testis and uterus, and sequenced on an Illumina sequencer. The sequences were analysed against the *C. milii* genome assembly using miRDeep. In addition, a homology search was performed by BLASTN using precursor miRNA sequences from miRBase (release 19) against the *C. milii* genome. A total of 693 miRNA gene loci were identified with 548 predicted by miRDeep, and another 145 predicted by homology searches (**Supplementary Table III.1**). Of these, 562 miRNA gene loci have orthologues in miRBase and the remaining 131 miRNA loci are novel. Of the 562 known miRNA, 302 belong to 136 miRNA families. Among the 131 novel miRNA, nine could be assigned to four novel families based on the similarity of their mature sequences.

Most of *C. milii* miRNAs are located in inter-genic regions (66.7% n=462) (**Supplementary Table III.2**) and intronic regions (26.9% n=187) (**Supplementary Table III.3**) with a small fraction found to overlap annotated coding exons (6.3% n=44) (**Supplementary Table III.4**). Approximately 18% of the miRNAs (98) are clustered within 3kb of another miRNA, with

the cluster size ranging from 2 to 7 miRNAs (**Supplementary Table III.5**). The top 10 most highly expressed miRNAs families in each tissue profiled in this study are shown in **Supplementary Fig. III.1**. To further define tissue-specific expression, we identified miRNAs whose expression levels were 20-fold greater than their median expression across the other tissues (**Supplementary Table III.6**). Overall, the tissue-specific expression profiles of *C. milii* miRNAs are similar to those observed in zebrafish and other vertebrates

60

#### *Novel miRNAs in C. milii*

A total of 131 novel miRNAs were predicted by miRDeep that are currently not observed in other species in miRBase (Release 19). Most of these novel miRNAs are expressed at levels when compared to known miRNAs (**Supplementary Fig. III.2**); they were identified by us mainly because of the deep sequencing of a number of different tissues. However, we did identify seven novel miRNAs (NOVEL\_scaffold108\_27224, JX994798; NOVEL\_scaffold317\_36270, JX994395; NOVEL\_scaffold98\_26104, JX994372; NOVEL\_scaffold10135\_43909, JX994714; NOVEL\_scaffold11\_6499, JX994412; NOVEL\_scaffold22\_11007, JX994414; NOVEL\_scaffold176\_32152, JX994420) that are highly expressed in a number of tissues (**Supplementary Fig. III.2**). For instance, NOVEL\_scaffold108\_27224 is among the top 10 most highly expressed miRNA in kidney, pancreas, spleen and testis while NOVEL\_scaffold98\_26104 is among the top 10 most highly expressed miRNA in kidney, pancreas and testis (**Supplementary Fig. III.1**).

#### *Secondary loss of miRNA families*

*C. milii* encodes more known families of miRNA (136 families) than sea lamprey (83 families), hagfish (69 families), zebrafish (94 families), *X. tropicalis* (86 families) and chicken (123 families) but fewer families than mouse (269 families) and human (558 families) (**Supplementary Fig. III.3**). This indicates a spurt in the expansion of miRNA families in mammalian lineages after they split from other vertebrates. In addition, very few families of ancient vertebrate miRNAs have been secondarily lost in mammals. For instance, only 5 families shared between *C. milii* and zebrafish, and 3 families shared between *C. milii* and chicken are lost in mouse and human. On the other hand, zebrafish has lost 22 families of miRNA (**Supplementary Table III.7**) that are conserved in *C. milii*, mouse and human. To verify if these losses are specific to zebrafish or common to teleost fishes, we carried out detailed searches of zebrafish, stickleback and fugu genome assemblies. Of the 22 families,

21 are lost in the three teleosts whereas only one family (mir-33) is lost specifically in the zebrafish lineage (**Supplementary Table III.7**). One of the lost miRNA families, mir-150, is involved in B-cell development in mice and human<sup>64,65</sup>. In *C. milii*, this family is expressed predominantly in the spleen and blood suggesting that it may have a similar function in *C. milii*. Two of the miRNAs lost in zebrafish (mir-33A and B) are located in the introns of *sterol-regulatory element-binding factor-1* and *-2* (*SREBF-1* and *-2*) genes in human and mouse. These miRNAs are known to regulate cholesterol metabolism in the liver and pancreas<sup>66,67</sup>. In *C. milii*, they are present in orthologous introns, and are expressed specifically in the liver and pancreas (**Supplementary Table III.7**).

## Supplementary Note IV. Origin and evolution of conserved noncoding elements in vertebrates

### IV.1 Methods

The *C. milii* genome was repeat-masked using WindowMasker (version 2011-10-19). The soft-masked genome sequences of 11 bony vertebrates – human (hg19), mouse (mm10), cow (bosTau7), opossum (monDom5), chicken (galGal3), lizard (anoCar2), *Xenopus tropicalis* (xenTro3), fugu (fr3), stickleback (gasAcu1), medaka (oryLat2) and zebrafish (danRer7) – were obtained from the UCSC Genome Browser website

(<http://hgdownload.cse.ucsc.edu/downloads.html>). The bony vertebrate genomes were split into 100 Mb subsequences (with 10 kb overlaps). Pairwise alignment of *C. milii* and each of these genomes was carried out using LASTZ<sup>68</sup> with parameters H=2000, Y=3400, L=6000, K=2200, Q= “HoxD55.q”, default gap opening and gap extension penalties. MULTIZ<sup>69</sup> was used to generate a multiple alignment which we term as the “12-way alignment”. A neutral model was obtained from the 12-way alignment by running PhyloFit<sup>70</sup> on four-fold degenerate sites of protein-coding genes using general reversible “REV” substitution model (**Supplementary Fig. IV.1**).

The 12-way alignment, neutral model and the following parameters – target coverage of input alignments 0.3, average length of conserved sequence 45 bp, the conserved model defined as  $\rho=0.3x$  of the neutral model – were used to run PhastCons<sup>71</sup> to predict conserved elements (CEs). We filtered these CEs, by firstly removing elements shorter than 60 bp or with log-likelihood (LOD) score lower than 30, and secondly classifying them into the following classes, requiring at least 30% CE coverage: protein-coding exons, UTRs, pseudogenes, ncRNA genes, other transcribed sequences and conserved noncoding elements (CNEs). To identify CEs that overlap protein-coding exons, UTRs, pseudogenes and ncRNA genes, the genomic coordinates of CEs were compared against the coordinates of *C. milii* genes. To eliminate other potentially protein-coding or transcribed sequences, a BLASTX search (E-value cutoff  $<1e-5$ ) of CEs was carried out against Ensembl release 69 proteins of human, opossum, chicken, *X. tropicalis*, fugu and zebrafish. In addition, genomic coordinates of CEs were compared to the coordinates of *C. milii* spliced RNA-seq transcripts (identified by BLAT alignments of RNA-seq transcripts to the *C. milii* genome assembly) to filter out any other transcribed sequence. The remaining CEs after filtering represent a genome-wide set of conserved noncoding elements (CNEs). Repetitive *C. milii* sequences (softmasked bases

exceeding 50%) were identified and excluded from this set of CNEs. Each CNE was assigned to the gene with the nearest transcription start site (TSS) located within 2 Mb of the CNE. For genes with multiple transcripts, the average coordinate of all TSSs was used. Only CNEs present in *C. milii* and at least two bony vertebrates were considered as gnathostome CNEs (gCNEs) since those present in *C. milii* and only one of the bony vertebrates could have evolved independently in the two lineages.

To ascertain the biological significance of CNEs, we compared the human CNEs (excluding sequences located on chrY, chrUn and unordered chromosomes) with two sets of functional sequences: ChIP-seq regions bound by the widely expressed transcriptional coactivator p300 in mouse embryonic tissue (mm9 assembly)<sup>72</sup> that have been “lifted over” to the human genome (hg19 assembly, 4,528 p300-binding sites), and experimentally validated tissue-specific transcriptional enhancers obtained from the VISTA Enhancer Browser<sup>73</sup> (800 enhancers). Enrichment of functional sequences in CNEs was determined using a binomial distribution of the overlaps between the functional regions and 1,000 sets of randomly selected noncoding and nonrepetitive regions in the human genome. One-tailed p-values were calculated to test the hypothesis that the number of overlaps in the CNE set was similar to that in the random sequence set.

To trace the origin of gCNEs, we searched the CNEs against the assemblies of the jawless vertebrate *Petromyzon marinus* v7 (GCA\_000148955.1), the tunicate *Ciona intestinalis* version KH (GCA\_000224145.1) and *Branchiostoma floridae* v2 (GCA\_000003815.1) using BLASTN (E-value cutoff <1e-5). To trace the evolution of gCNEs in different lineages, we first counted the CNEs present in each of the extant species ( $\geq 30\%$  coverage) and then determined CNEs that were present in the most recent common ancestors of the four teleost fishes and the seven tetrapods by combining the numbers of CNEs in each of the descendant species. We then estimated the number of CNEs lost in each of the lineages. The loss of CNEs in a particular genome was verified by a lack of a BLASTN hit (E-value cutoff <1e-5) in the repeat-masked genome. To provide further evidence that missing CNEs are indeed lost and not undetectable simply because of sequencing gaps, we searched for gap-free syntenic intervals in *C. milii* and zebrafish or human genomes. Gap-free syntenic intervals in two genomes were defined as contiguous genomic regions shorter than 500 kb that are flanked by 2 orthologous alignments of  $\geq 70\%$  identity over 60 bp, and in the same order and orientation. The majority of tetrapod-lost (99.7%) and teleost-lost (89%) gCNEs that could be assigned to

syntenic intervals in human and zebrafish, respectively, were located in ungapped syntenic intervals. These high proportions suggest that the absence of gCNEs in teleost fish or tetrapod genomes is largely due to divergence or deletion of gCNE sequences rather than incomplete sequencing of genomes.

Elephant shark orthologues lost in teleost fishes were identified as those *C. milii* genes with no Inparanoid orthologue or reciprocal BLASTP hit (E-value cutoff  $<1e-5$ ) in zebrafish, medaka, stickleback or fugu. Similarly, *C. milii* orthologues lost in tetrapods were identified as those with no Inparanoid orthologue or reciprocal BLASTP hit (E-value cutoff  $<1e-5$ ) in human, mouse, cow, opossum, chicken, lizard or *X. tropicalis*.

To determine the functional enrichment of genes associated with pan-gnathostome CNEs, the R-package ‘topGO’ was used to identify the Gene Ontology (GO) terms that were most significantly associated with the genes. The ‘weight01’ algorithm was used to account for the GO graph structure and the Fisher’s Exact Test was applied to find significantly enriched GO terms. We used the human gene annotation of the pan-gnathostome CNEs because GO annotation of the human genome is more comprehensive than that of the *C. milii* genome. GO annotation of human genes was obtained from Ensembl release 65. Adjustment of p-values was not carried out for multiple testing, because according to the program documentation, p-value adjustment is not recommended for the ‘weight01’ method.

## IV.2 Results

Comparative genomics of vertebrates have indicated that a substantially higher proportion of conserved sequences are located in noncoding rather than protein-coding regions of the genome<sup>71,74</sup>. This implies that a majority of functional elements reside in the noncoding regions of vertebrate genomes. Transgenic assays of conserved noncoding elements (CNEs) have shown that a significant proportion have the potential to drive gene expression<sup>75-77</sup>. *C. milii*, by virtue of its phylogenetic position, is a crucial reference genome to study the origin and evolution of CNEs in vertebrates.

Previous comparison of a 1.4× coverage assembly of the *C. milii* genome and whole genomes of eight bony vertebrates had identified ~8,500 CNEs ( $\geq 70\%$  identity over  $\geq 100$  bp; total length 1.82 Mb) conserved in *C. milii* and at least one bony vertebrate<sup>78</sup>. With the whole



genome sequence of *C. milii* at hand, we set out to identify a comprehensive set of CNEs in gnathostomes. We generated pair-wise alignments followed by a set of multiple alignments for *C. milii* and 11 bony vertebrate genomes (human, mouse, cow, opossum, chicken, lizard, *X. tropicalis*, fugu, stickleback, medaka, zebrafish) using *C. milii* as the reference, and predicted evolutionarily constrained elements using PhastCons. We identified a set of 63,877 ‘gnathostome CNEs’ (gCNEs) that are conserved in *C. milii* and at least two bony vertebrates (**Supplementary Table IV.1**). These gCNEs (average size 271 bp; total length 17.3 Mb) represent a minimal set of noncoding elements that were present in the common ancestor of gnathostomes and that have remained constrained in gnathostome genomes over a period of 450 million years. Comparison of gCNEs in human with p300-binding sites that demarcate enhancers<sup>72</sup>, and with transcriptional enhancers verified in transgenic mouse assays<sup>73</sup>, showed that the human gCNEs are 12-fold ( $p < 10^{-200}$ ) and 22-fold ( $p < 10^{-200}$ ) enriched for p300-binding sites and transcriptional enhancers, respectively (**Supplementary Table IV.2**), indicating that the predicted gCNEs are enriched for regulatory elements.

#### *Origin of gnathostome CNEs*

To determine the origin of gnathostome CNEs, we searched the CNEs present in *C. milii* and at least one bony vertebrate against the genomes of sea lamprey (*Petromyzon marinus*), sea squirt (*Ciona intestinalis*) and amphioxus (*Branchiostoma floridae*). These organisms represent the lineages of jawless vertebrates, urochordates and cephalochordates, respectively. Of the 109,472 CNEs, only 539 (0.5%), 114 (0.1%) and 290 (0.3%) could be found in the genomes of sea lamprey, sea squirt and amphioxus, respectively, indicating that only a minor fraction of the CNEs ( $\leq 0.6\%$ ) originated in chordates that arose before gnathostomes. Even considering that the currently available sea lamprey genome is incomplete (genome was sequenced using liver DNA which contains only 80% of the germline genome), the whole genome of the sea lamprey is likely to contain  $< 1.0\%$  of gnathostome CNEs. This indicates that the emergence of gnathostomes was accompanied by the recruitment of a massive number of CNEs (putative *cis*-regulatory elements) and the assembly of elaborate gene regulatory networks built around them. Such gene regulatory networks likely underlie the more complex morphological and physiological phenotypes of gnathostomes compared to jawless vertebrates and non-vertebrate chordates.

#### *Pan-gnathostome CNEs*

A subset of 1,687 gCNEs are conserved in all 12 gnathostome genomes studied. These “pan-gnathostome CNEs” (average size of  $378 \pm 251$  bp) are significantly longer than all gCNEs (average size  $271 \pm 201$  bp; two-tailed t-test p-value =  $2.32 \times 10^{-9}$ ). These CNEs are associated with 636 genes in the human genome. GeneOntology analysis shows that they tend to be located near genes with transcription factor, chromatin-binding and protein hetero- and homo-dimerization activity (**Supplementary Table IV.3**). They were also associated with genes involved in development of the central nervous system (e.g. neuron differentiation, dorsal spinal cord development), limb, kidney and eye (**Supplementary Table IV.4**). This finding is mirrored by the fact that most genes with the highest numbers of pan-gnathostome CNEs are transcription factor-encoding and/or developmental genes (**Supplementary Table IV.5**). Since these CNEs are under extreme selective constraint in gnathostome genomes, the regulatory network of their target genes must also be highly constrained in gnathostomes. Finally, of these 1,687 pan-gnathostome CNEs, only 55 (3.3%) are present in the sea lamprey genome assembly (which is less than 80% complete) or ~5% in the whole genome, compatible with the notion that major morphological and physiological innovations have occurred in the lineage leading to jawed vertebrates.

#### *Evolutionary pattern of gCNEs in bony vertebrate genomes*

We investigated the evolutionary pattern of gCNEs in the two major lineages of bony vertebrates, i.e. the teleosts and tetrapods. Interestingly, the ancestor of the four teleosts had lost nearly eight times more gCNEs (22,536) than the tetrapod ancestor (2,870). The 22,536 gCNEs lost in all four teleost fishes are associated with 6,483 genes in the *C. milii* genome (**Supplementary Table IV.6** lists the top 20 genes), while the 2,870 gCNEs lost in the seven tetrapods are associated with 2,212 *C. milii* genes (see **Supplementary Table IV.7** for a list of top 20 genes that have lost the highest number of gCNEs). One possible reason for the loss of gCNEs is that they may have been associated with genes that are lost in that particular lineage. However, we found that only 9% and 12% of the gCNEs lost in teleosts and tetrapods, respectively, are associated with *C. milii* genes that do not have orthologues in these genomes. This indicates that a vast majority of gCNEs (~90%) have been lost despite their putative target genes still being present in the teleost or tetrapod genomes.

The high proportion of gCNE loss in teleosts (35%; 22,536 out of 63,877) could be due to the higher rate of nucleotide substitution in teleost genomes<sup>79,80</sup>. Furthermore, it has been shown

protein-coding sequences in teleosts have experienced a higher frequency of indels (predominantly deletions) than human genes<sup>81</sup>. If noncoding regions of teleosts have also experienced this mutation bias, indels could also have contributed to the loss of gCNEs in teleosts. It is widely accepted that *cis*-regulatory mutations and the resulting changes in gene expression patterns have the potential to give rise to phenotypic variations<sup>82,83</sup>. Teleost fishes are the largest (50% of all living vertebrate species) and the most diverse group of vertebrates. They exhibit spectacular variation in their morphology, behaviour and adaptive features. It is possible that the loss/divergence of a large number of gCNEs (putative *cis*-regulatory elements) might have contributed to the phenotypic diversity of teleosts. Further experimental studies are required to verify this hypothesis.

## Supplementary Note V. Phylogenomics of vertebrates

### V.1 Methods

#### Orthologue identification

The complete proteome datasets for the following 10 vertebrates were downloaded from Ensembl version 65 (December 2011) - human, mouse, cow, opossum, chicken, lizard, *Xenopus tropicalis*, stickleback, zebrafish and sea lamprey. The coelacanth proteome was obtained from Ensembl version 66 (February 2012, LatCha1) and the amphioxus dataset was downloaded from JGI Genome Portal (<http://genome.jgi-psf.org/Brafl1/Brafl1.home.html>). The *C. milii* protein dataset is from the present study. For orthologue identification, only the longest isoform of every protein sequence was retained. InParanoid<sup>84</sup> was run with default settings (i.e., minimum 50% alignment span, minimum 25% alignment coverage, minimum BLASTP score of 40 bits, minimum inparalog confidence level of 0.05) to identify orthologues between each pair of species. MultiParanoid<sup>85</sup> was used to create multi-species clusters of InParanoid orthologues. A custom Perl script was used to generate a dataset comprising strict one-to-one orthologues (core orthologues) from the 13 chordates. Although the sea lamprey genome assembly is considered to be incomplete, the relative completeness of the other genomes to which sea lamprey is compared, mitigates the risk of assigning orthologs incorrectly.

#### Phylogenomic analyses using a genome-wide set of chordate core-orthologues

In total there were 699 one-to-one orthologues in the 13 chordate dataset. Individual protein alignments of these 'core' orthologues were generated using ClustalW. A concatenated alignment was then prepared by merging individual alignments of these 699 proteins. The concatenated alignment was trimmed using Gblocks version 0.91b<sup>86</sup> with auto settings (minimum number of sequences for a conserved position = 7; minimum number of sequences for a flank position = 11; minimum number of contiguous non-conserved positions = 8; minimum length of a block = 10; allowed gap positions = none). The combined length of the trimmed amino acid alignment was 237,907 positions.

For phylogenetic analyses we used Maximum Likelihood (ML) and Bayesian inference (BI) using RAxML<sup>87</sup> and MrBayes<sup>88</sup>, respectively. The best-fit substitution model for the alignment was determined using ModelGenerator<sup>89</sup>.

#### *Maximum Likelihood*

We used the rapid bootstrapping algorithm plus a thorough ML search (-f a option) as implemented in RAxML-7.2.6<sup>87</sup>. Bootstrap support values/percentages were determined using 100 replicates. A JTT (Jones-Taylor-Thornton) amino acid substitution model<sup>90</sup> with Gamma model of rate heterogeneity (PROTGAMMAJTTF option) as recommended by ModelGenerator was used for the ML run.

### *Bayesian Inference*

We used the parallel (MPI) version<sup>91</sup> of MrBayes 3.2.1 for Bayesian inference. A JTT substitution model with gamma distributed rates was used for the analysis. Two independent runs starting from different random trees were run for 1 million generations with sampling every 100 generations. A consensus tree was generated from all sampled trees excluding the first 2500 samples (corresponds to 25% of the samples) which were discarded as ‘burn-in’. Number of chains and processors used were 4 and 8, respectively. Check-pointing (check-frequency of 20,000) was used to help in resumption of the analyses in case of a crash or timeout.

### **Testing of alternate topologies**

We tested the likelihoods of alternate topologies using CONSEL<sup>92</sup>. Site-wise log-likelihood values for the topologies being tested were generated using the “-f g” option implemented in RAxML-7.2.6<sup>87</sup>. These values were used as input for CONSEL. The following five topologies out of the various possible permutations were specifically tested:

1. Chondrichthyes (represented by *C. milii*) sister to [Sarcopterygii (lobe-finned fishes and tetrapods) + Actinopterygii (represented by stickleback and zebrafish)]
2. Actinopterygii sister to (Chondrichthyes + Sarcopterygii)
3. Tetrapods sister to (lobe-finned fishes, (Teleostei, Chondrichthyes))
4. Tetrapods sister to (Teleostei, (lobe-finned fishes, Chondrichthyes))
5. Tetrapods sister to (Chondrichthyes, (lobe-finned fishes, Teleostei))

Topology 1 is the traditional view where Chondrichthyes (cartilaginous fishes) represent the sister group of bony vertebrates. Topology 2 was suggested as an alternative tree in a previous study<sup>93</sup> and was also implied by a tree generated using 271 full-length cDNA sequences (198 kb alignment) from *C. milii*<sup>94</sup>. Topologies 3 to 5 were supported by the

phylogenetic analysis of protein-coding genes from whole mitochondrial genome sequences<sup>95</sup>.

## V.2 Results

Morphological and paleontological studies have placed Chondrichthyes (cartilaginous fishes) as a sister group to all other gnathostomes<sup>96</sup>. However, molecular phylogenetic analyses based on mitochondrial sequences or nuclear genes have produced conflicting topologies. Molecular phylogeny based on whole mitochondrial genome sequences<sup>95,97,98</sup> split gnathostomes into two clades – Tetrapods and Pisces with the latter including all bony fishes such as lobe-finned fishes and Actinopterygians, and placed chondrichthyans at a terminal position in the piscine branch. On the other hand, analyses of nuclear protein-coding genes have supported the traditional view with varying degrees of support. A traditional tree with a split between chondrichthyans and bony fishes was recovered with a set of 35 nuclear genes<sup>99</sup>. However, this study did not include any lobe-finned fish, and tetrapods were represented by human only. A similar topology was obtained using a smaller dataset of seven nuclear genes that included lungfishes as representatives of lobe-finned fishes<sup>100</sup>. A subsequent study using 14 nuclear genes placed chondrichthyans as sister group to bony vertebrates but could not reject alternative hypotheses (i.e., the ray-finned fishes as sister group to other jawed vertebrates or the monophyly of Pisces)<sup>93</sup>. More recently, analysis of 78 nuclear genes (21,749 amino acid positions) derived from ESTs from lungfish and chondrichthyans supported the traditional tree<sup>101</sup>.

The availability of the whole genome sequence of *C. milii* provided a unique opportunity to address this controversy using a phylogenomics approach. We generated Maximum Likelihood (ML) and Bayesian inference (BI) trees using a genome-scale dataset comprising one-to-one orthologues from 13 chordates. This dataset, comprising 699 genes (concatenated amino acid alignment length: 237,907 positions), is an order of magnitude larger than previously used datasets. Both the ML and BI trees gave identical topologies with strong bootstrap (BS) and posterior probability (PP) support for all nodes (**Supplementary Fig. V.1**). With both phylogenetic methods, *C. milii* emerged as a sister group to the remaining gnathostomes with maximal support (BS 100, PP 1.0), consistent with the traditional morphology-based vertebrate phylogeny. The two trees also showed strong support for monophyly of bony vertebrates (BS 98, PP 1.0) which are divided into Sarcopterygii (BS 100, PP 1.0) and Actinopterygii (BS 100, PP 1.0). We evaluated the likelihood of five

alternative topologies using CONSEL (see **Supplementary Table V.1**). Topology testing using CONSEL indicated that the topology with *C. milii* as a sister to the bony vertebrates was the most likely topology (approximately unbiased test, AU: 0.972, bootstrap probability, NP: 0.970). In fact, all CONSEL tests gave unambiguous support for this topology (**Supplementary Table V.1**). The second topology with Actinopterygii as sister to Chondrichthyes + Sarcopterygii (AU: 0.028) was rejected based on the 5% significance level. The remaining three topologies, that were previously proposed based on the analysis of mitochondrial sequences, were also significantly rejected (AU: 4e-37, 9e-43 and 1e-74 for topology 2, 3 and 4, respectively). Thus, both the phylogenomic analysis and topology testing provided robust support to the traditional phylogenetic tree with a split between Chondrichthyes and bony vertebrates.

Another promising character state for phylogenetic analysis is the gain/loss of introns which are rare events<sup>102,103</sup>. Indeed, for more than 99% of intron positions with observed changes in *C. milii* and other vertebrates (see section on Intron evolution), the phylogenetic distribution could be explained by a single intron gain or loss. To address the controversy regarding the phylogenetic position of chondrichthyans, we used slow-evolving invertebrate outgroups to search for intron gain/loss events supporting alternative hypotheses for the deepest divergences within gnathostomes (see **Supplementary Note VII**). The resultant data was unequivocal, with 13 gains and 10 losses supporting *C. milii* as a sister group to bony vertebrates, and no character supporting an alternative phylogeny in which *C. milii* groups with teleost fish ( $P = 2 \times 10^{-7}$ ). Thus, the gain and loss of introns provided independent support for Chondrichthyes as a sister group to bony vertebrates.

## Supplementary Note VI. Rate of molecular evolution

### VI.1 Methods

#### Tajima's Relative Rate Test

We used the concatenated protein alignment (237,907 positions) obtained from the core orthologue dataset for 13 chordates. Sea lamprey was used as outgroup for testing the relative rates of *C. milii* proteins with those of the remaining gnathostomes. The relative rate test (RRT) is based on three sequences – two ingroups and one outgroup. A significantly lower number of unique differences (based on p-value) in either of the ingroup sequence would suggest that the particular ingroup is evolving at a slower rate compared to the other ingroup.

#### Two-Cluster Analysis

We performed the Two-Cluster test as implemented in the program LINTRE<sup>104</sup>. The Two-Cluster Test can be considered as an extension of the RRT that addresses the comparison of multiple sequences<sup>105</sup>. Pairwise distances between individual taxa were calculated from the 13-chordate ML tree (**Supplementary Fig. V.1**) using the R-package 'ape'. The corresponding 13 chordate protein alignment was converted to an appropriate format for LINTRE. A tree file was prepared manually based on the distances calculated from the ML tree (see LINTRE documentation). Since direct comparison of *C. milii* with specific taxa (or groups) was not possible in the complete dataset, we performed additional pairwise comparisons between *C. milii* and the taxa/group of interest. Specifically, we were interested in comparing *C. milii* with the coelacanth, tetrapods (represented by human, mouse, cow, opossum, chicken, lizard, *Xenopus*), teleosts (represented by stickleback and zebrafish) and sea lamprey. For these pairwise tests, only the sequences of interest were retained in the concatenated alignment and the input tree was adjusted accordingly. The resultant Two-Cluster output tables indicated which of the taxa/groups under consideration was evolving significantly faster or slower based on Z-statistics. Lintre calculates standard errors based on variances and covariances of the pairwise distances. For confirmation, we also calculated standard error values based on 100 bootstrap replicates using MEGA5<sup>106</sup> and 100 random trees selected from the Bayesian samples excluding burn-in.

Since there is a tendency of branch lengths to be underestimated in regions of a tree containing few species (node-density artifact)<sup>107</sup>, we checked for the presence of this phenomenon in our Bayesian tree using the node-density artifact analyzer



(<http://www.evolution.reading.ac.uk/pe/index.html>). However, we did not find this artifact in our tree.

### Neutral tree based on four-fold degenerate sites

To compare the neutral nucleotide mutation rate for the different species, we generated a neutral tree based on an alignment of four-fold degenerate (4D) sites from 13 chordates. We used the topology obtained from our phylogenomic analyses (**Supplementary Fig. V.1**) as an input for RAxML-based optimization of branch lengths for the 4D alignment. Codon alignments of the coding sequences based on the individual protein alignments were generated using PAL2NAL<sup>108</sup>. A concatenated coding sequence alignment was generated from them. An alignment of 4D sites was extracted from this coding sequence alignment using the ‘do.4d’ option (‘read.msa’ function) as implemented in the RPHAST package<sup>109</sup>. The extracted 4D alignment contained 30,179 positions. We used the “-f e” option (optimize model+branch lengths for the input tree under GAMMA) in RAxML-7.2.6<sup>87</sup> to generate a neutral tree for this alignment. A General Time Reversible nucleotide substitution model<sup>110</sup> with Gamma model of rate heterogeneity (GTRGAMMA) as deduced by ModelGenerator<sup>89</sup> was used for the analysis. Pairwise distances to the outgroup (amphioxus) were calculated from the neutral tree using the ‘cophenetic.phylo’ function as implemented in the R-package ‘ape’<sup>111</sup>.

### VI.2 Results

Previous studies based on a few mitochondrial and nuclear protein-coding genes have shown that the nucleotide substitution rate in elasmobranch sharks is an order of magnitude slower than that of mammals<sup>112,113</sup>. To determine if this is a genome-wide phenomenon of chondrichthyans, we estimated and compared the molecular evolutionary rate of *C. milii* and other vertebrates using genome-wide set of 699 orthologous protein-coding genes. We first tested the evolutionary rates of protein-coding sequences from 13 chordates using the concatenated amino acid alignment (237,907 positions). Sea lamprey was used as the outgroup for comparing evolutionary rates in *C. milii* with other gnathostomes. Tajima’s Relative Rate tests indicated that the *C. milii* protein-coding genes were evolving slower than not only mammals but also all other gnathostomes examined including the coelacanth (p-value < 0.01 for all comparisons; **Supplementary Table VI.1**). Comparison of relative rate of *C. milii* proteins with those of sea lamprey using amphioxus as the outgroup revealed that

*C. milii* proteins were evolving significantly slower than those of sea lamprey as well ( $\chi^2$ : 794.53, p-value: 8.3E-175).

Additionally, we performed the Two-Cluster Test as implemented in the program LINTRE<sup>104</sup>. This test also indicated that protein sequences in the *C. milii* lineage were evolving significantly slower than those in other gnathostomes (Z-stat: 14.98, confidence probability CP: 99.96%; **Supplementary Table VI.2**, tree 1, node 23). In order to make a direct comparison of *C. milii* with other gnathostome groups, we performed a pairwise Two Cluster test involving the two ingroups of interest (*C. milii* and either coelacanth, tetrapods, teleosts or sea lamprey) and outgroups sea lamprey and/or amphioxus. These pairwise Two-Cluster Tests provided further evidence that *C. milii* sequences were evolving significantly slower than those of coelacanth, tetrapods, teleosts and sea lamprey (Z-stat: 14.18, 10.93, 20.24, and 27.93, respectively and CP: 99.96% (**Supplementary Table VI.2**). We also checked whether the distances to outgroup (from the ML tree, **Supplementary Fig. V.1**) were significantly different for *C. milii* compared to other vertebrate groups using Z-statistics. For this purpose, standard errors were calculated by comparison with 100 randomly sampled Bayesian trees and 100 bootstrap replicates from MEGA5. This analysis further confirmed that *C. milii* (0.93 substitutions per site) is slower-evolving than coelacanth, tetrapods, teleost fishes and sea lamprey (0.96, 1.02, 1.05 and 1.04 substitutions per site, respectively) (**Supplementary Table VI.3**). Thus, both RRT and Two-Cluster Tests show that the *C. milii* protein-coding sequences are evolving significantly slower than those of all other vertebrates.

To determine whether the slow evolutionary rate of protein-coding genes in *C. milii* is a reflection of the neutral nucleotide mutation rate, we generated a tree based on 4D sites. Based on the branch lengths of the neutral tree (**Fig. 2**), *C. milii* appears to be the slowest-evolving species among the vertebrates. To confirm this, we examined the actual distances to the outgroup (**Supplementary Table VI.4**) and found that *C. milii* had the smallest pairwise distance to amphioxus (2.06 substitutions per 4D site) followed by coelacanth (2.121 substitutions per 4D site) and sea lamprey (2.125 substitutions per 4D site). This confirms that the neutral evolutionary rate is also the lowest for *C. milii*. Recently, the genome of the western painted turtle was sequenced and shown to have a lower substitution rate relative to other amniote species analyzed<sup>114</sup>. In order to compare the neutral substitution rates of the turtle with *C. milii*, we generated a neutral tree using 4D sites extracted from 399 one-to-one orthologues from 14 chordate species including those from turtle (**Supplementary Fig.**

**VI.1).** This neutral tree also showed that the neutral substitution rate of *C. milii* is the lowest among all the vertebrates.

Our analyses have shown that the overall molecular evolutionary rate of *C. milii* is the lowest among vertebrates. The reason(s) for the slow evolutionary rate is not clear. Several physiological and environmental factors have been proposed to explain the inter-specific variation in molecular evolutionary rates, including body size, weight-specific metabolic rate, generation time (or number of germ line replication events per generation), DNA repair efficiency, and exposure to mutagens such as UV radiation<sup>115-117</sup>. *C. milii* is a moderate-sized cartilaginous fish (maximum length ~120 cm) that normally lives off southern Australia and New Zealand at depths of 200 to 500 m<sup>118</sup>, and visits shallow bays and estuaries only during spring for spawning. Males and females attain maturity around three and four years, respectively<sup>119</sup>. It is a benthic forager feeding mainly on crustaceans, molluscs, echinoderms and polychaetes<sup>120</sup>. Although the metabolic rate of *C. milii* is not known, it is likely to be low, because the metabolic rates of its close relatives, the elasmobranchs are 5 to 10 times lower than mammals<sup>121</sup>. Additionally, elasmobranchs with a less-active lifestyle have a lower metabolic rate than the more active ones<sup>122</sup>. A higher metabolic rate is hypothesized to result in an increased mutation rate owing to DNA damage by mutagenic by-products of oxidative respiration, and increased rate of DNA synthesis and nucleotide replacement<sup>116,123,124</sup>. Consequently, a lower metabolic rate should result in a decreased mutation rate.

## Supplementary Note VII. Intron evolution in vertebrates

### VII.1 Methods

We extracted intron-exon structures from the GTF and genomic files of *C. milii* and nine other vertebrates – human, mouse, cow, opossum, chicken, Anolis lizard, *X. tropicalis*, stickleback and zebrafish (downloaded from Ensembl version 65). A set of 3,603 orthologous genes among these vertebrates was identified by using InParanoid and Multiparanoid (see **Supplementary Note V**). The orthologues were aligned at the protein level using ClustalW and positions corresponding to intron positions were mapped using a custom Perl script. Only introns longer than 50 nucleotides with characteristic U2 or U12 splicing boundaries (GT/AG, GC/AG or AT/AC) were considered.

We used the following method to obtain an initial set of discordant (i.e., not present in all studied vertebrates) intron positions: For each pair of species, we extracted the pairwise alignment from the 10-species ClustalW alignment. We then identified positions at which one species had an intron but at which the other species (i) lacked that intron position; (ii) lacked an intron within 10 codons; and (iii) had a conserved local alignment. To determine whether two species have conserved local alignment, we considered the region of pairwise alignment including the 10 aligned amino acid positions both up- and downstream of the intron position (that is, not including positions at which both species contained gaps). A region was scored as conserved if the region: (i) is not dominated by gaps (defined as  $\leq 10$  gaps within the closest 10 aligned amino acid positions) and (ii) has  $\geq 50\%$  amino acid identity within the 10 aligned positions. Next, for each intron position for which both up- and downstream regions passed this automatic filtering process, two researchers independently manually analyzed the region, which led to elimination of 7% of intron positions (located within low-complexity, repetitive regions or regions of uncertain alignment). In addition, many species-specific introns were found to be highly dubious, with short intron lengths that were multiples of three nucleotides and did not contain in-frame stop codons - these were removed.

This left 1,052 discordant intron positions. We then set out to determine whether these positions had undergone intron gains or losses, and the phylogenetic position of the change(s). Phylogenetic distribution of 939 positions could be determined automatically by a custom Perl script. For the remaining 113 introns, manual inspection was required to ascertain the history of intron gain and loss due to various alignment and annotation difficulties (e.g., large number of positions in the alignment that lack sequence similarity for

some species [typically only one species]), suggesting that the aligned regions for that species were not homologous to the regions for the other species. Intron gain and loss was inferred based on these phylogenetic distributions using parsimony. Supporting the approach of parsimony was the finding that 99% of discordant intron positions exhibited a phylogenetic pattern consistent with a single loss or gain.

Emboldened by the highly parsimonious phylogenetic patterns observed, we next used intron losses and gains to study early gnathostome phylogeny. Two main competing hypotheses for early gnathostome phylogeny were tested: grouping teleost fish either with tetrapods (Tel+Tet) or with elephant shark (Tel+ES). The former implies a split between Chondrichthyes and bony vertebrates and supports the traditional phylogeny based on morphological characters. We studied invertebrate intron-exon structures to trace the history of intron loss and gain within early gnathostomes in order to determine their phylogenetic relationships. Intron positions found in elephant shark and invertebrates but not in teleosts or tetrapods lend support to the “Tel+Tet” hypothesis (i.e., loss in the Tel+Tet ancestor), as do introns found only in teleosts and tetrapods (i.e., gain in the Tel+Tet ancestor). Conversely, intron positions restricted to invertebrates and tetrapods (i.e., loss in Tel+ES ancestor) or to teleosts and elephant shark (i.e., gain in Tel+ES ancestor) lend support to the “Tel+ES” hypothesis.

To seek support for either hypothesis, we studied 49 intron positions whose distribution within the ten vertebrates made them potentially informative (25 *C. milii*-specific, 20 bony vertebrate-specific and four tetrapod-specific). For each intron, we performed protein alignments with mapped intron positions of vertebrates and the orthologue of the slow-evolving cephalochordate amphioxus (*Branchiostoma floridae*), as described above. This clearly indicated intron presence or absence for most introns. In other cases, the gene or gene region appears to be absent from the current set of amphioxus gene predictions. In these cases it was necessary to use TBlastN searches against the genome itself to find the region in the amphioxus genome, which showed clear intron presence/absence in several additional cases. In cases where amphioxus lacked the intron, we studied additional slow-evolving invertebrate species for which genomes are available (the lophotrochozoan *Lottia gigantea*, the cnidarian *Nematostella vectensis*, and the placozoan *Trichoplax adhaerens*, downloaded from <http://www.jgi.doe.gov/>), using the same method. In total, this analysis yielded 23 phylogenetically informative characters, all of them supporting the “Tel+Tet” hypothesis (13

intron gains and 10 losses), and none supporting the “Tel+ES” (for the two Tel+ES introns for which presence/absence could be determined in invertebrates, the introns were present in various invertebrates, consistent with a single loss in the tetrapod ancestor, regardless of phylogeny). **Supplementary Table VII.1** summarizes these discordant introns that have undergone a change in the deepest branches within gnathostomes: 15 changes on the *C. milii* branch (9 gains and 6 losses), 23 changes on the Tel+Tet branch (13 gains and 10 losses), and seven changes that could not be directionalized because of insufficient or conflicting evidence in invertebrate outgroups.

## VII.2 Results

To investigate the evolution of vertebrate gene structures, we compared approximately 40,000 intron positions in 3,603 sets of orthologous genes from *C. milii* and nine bony vertebrates, comprising the most extensive study of intron-exon evolution in vertebrates. The vast majority of intron positions in conserved protein-coding regions were intact between *C. milii* and all other vertebrate species. *C. milii* showed presence/absence differences from other vertebrate species at 43 positions, 15 of which were found to be due to changes in the *C. milii* lineage, indicating a low rate of change (15 changes per ~40,000 sites in ~450 My, or roughly  $10^{-6}$  per site per My). The number of changes since the gnathostome ancestor is smaller in *C. milii* than in any bony vertebrate (**Fig. 2**), which is consistent with the lower rates of molecular evolution of *C. milii*. The higher rate of changes in bony vertebrates however, appears to mostly reflect a higher rate of change in the osteichthyan ancestor, the rates of change in *C. milii* being otherwise comparable to those in tetrapods. Rates of change were much higher overall in the two teleost fishes, and particularly in stickleback - 68% of all changes (and 83% of gains) were specific to stickleback, and 83% of all changes occurred in teleost fishes. Intron losses outnumbered intron gains in 13/17 branches, with the striking exception of stickleback, in which gains outnumbered losses 5-to-1 (603/126) (**Fig. 2**). Thus, the present study has identified the largest number of gains and losses of introns recorded in any vertebrate lineage. Previous genome-wide studies had found evidence mainly for loss of introns in mammals and teleosts<sup>125-127</sup> whereas our study shows that gain of introns is also prevalent in some subset of vertebrate lineages.

## Supplementary Note VIII. Large-scale synteny analysis

### VIII.1 Identification of syntenic blocks

The InParanoid orthologue gene sets for human-*C. milii*, chicken-*C. milii*, medaka-*C. milii* and zebrafish-*C. milii* were used for this analysis. i-ADHoRe v3.0<sup>128</sup> was used to identify orthologous regions/syntenic blocks in the genome pairs compared. The following parameters were used: “alignment\_method= gg4, anchor\_points = 3, tandem\_gap = 15, gap\_size = 30, cluster\_gap = 35, max\_gaps\_in\_alignment = 35, q\_value = 0.75, prob\_cutoff = 0.01, level\_2\_only = false, multiple\_hypothesis\_correction = FDR”. The program first identifies homologous regions (segments) in two genomes that contain at least three homologous genes (anchorpoints) with the anchorpoints separated by at most 30 non-homologous genes (‘gap\_size’). These form the base-clusters (with minimum quality factor of 0.75 and probability cut-off of 0.01), which are then grouped into larger syntenic blocks (‘multiplicons’) if they are within 35 genes (‘cluster\_gap’) of each other. Considering only the non-redundant ‘multiplicons’ (syntenic blocks) and their corresponding ‘anchor points’ (homologous genes of the syntenic segments), syntenic blocks between *C. milii* scaffolds and chromosomes of other genomes were identified, and the number of orthologous genes in the syntenic blocks was tabulated.

### VIII.2 Large-scale synteny conservation

By virtue of its phylogenetic position, *C. milii* is an ideal outgroup for inferring large-scale chromosomal rearrangements in bony vertebrate lineages and for inferring the ancestral gnathostome linkage groups. We carried out large-scale synteny comparison between *C. milii* and representative tetrapods (human and chicken) and teleost fishes (medaka and zebrafish). Comparisons with tetrapods revealed that 72% and 93% of *C. milii* syntenic scaffolds show conserved synteny with single chromosomes in human and chicken, respectively (**Supplementary Table VIII.1 and VIII.2; Supplementary Fig. VIII.1**). Interestingly, a majority of *C. milii* scaffolds showing synteny with two or more human chromosomes (21% out of 28%) correspond to single chicken chromosomes (**Supplementary Table VIII.2**), highlighting previously reported instances of interchromosomal rearrangements in the mammalian lineage<sup>129,130</sup>. On the other hand, there is one instance of *C. milii*-human one-to-one correspondence which shows a one-to-two relation with chicken chromosomes, a previously identified rearrangement in the chicken lineage<sup>39,129</sup>. Comparisons with teleost fishes showed that 88% and 74% of *C. milii* syntenic scaffolds show one-to-one or one-to-

two correspondence with medaka and zebrafish chromosomes, respectively (**Supplementary Table VIII.3 and VIII.4**). Because teleost fishes have undergone an additional round of whole genome duplication (3R)<sup>80,131</sup>, one-to-two correspondences were also considered as conserved synteny. Overall, these comparisons show that the *C. milii* genome has experienced a lower rate of interchromosomal rearrangements, comparable to the chicken genome which possesses the most stable karyotype among tetrapods<sup>132,133</sup>. Based on a comparison between human and medaka genomes using *Ciona* and sea urchin as outgroups, Nakatani et al.<sup>130</sup> had previously reconstructed an ancestral gnathostome karyotype comprising 40 proto-chromosomes. Our analyses of one-to-one conserved syntenic blocks between *C. milii*, chicken and human has identified seven novel syntenic relationships between chicken and human chromosomes that do not correspond to any of the reconstructed gnathostome proto-chromosomes (**Supplementary Table VIII.5**). These syntenic regions potentially represent additional ancestral gnathostome proto-chromosomes.

In addition to the one-to-one correspondence with tetrapod chromosomes, synteny of many large blocks of genes on *C. milii* scaffolds is extensively conserved in tetrapods. This is illustrated by the syntenic regions *C. milii* scaffold\_14 (~10 Mb) and human chr\_2q23.3 - 2q33.1 (45 Mb) (**Supplementary Fig. VIII.2**) that contain 148 syntenic genes including the HOXD gene cluster. HOXD cluster genes are regulated by evolutionarily conserved, long-range enhancers and global control regions located outside the HOX cluster and spread over several flanking non-Hox genes<sup>134-136</sup>. The HOXD locus thus represents a typical genomic regulatory block (GRB) characterized by large genomic regions containing several conserved regulatory elements and their target genes interspersed with ‘bystander’ genes<sup>137</sup>. The conserved syntenic regions identified in this study extend far beyond the previously identified GRB at the HOXD locus and raise the possibility of a much larger GRB than previously identified<sup>136</sup>. The extensive syntenic blocks conserved between the *C. milii* and human genomes should help to delineate many more potential GRBs in the human genome.

Avian karyotypes typically contain a large number of microchromosomes that are apparently derived from similar microchromosomes in the tetrapod ancestor<sup>133,138</sup>. Although the karyotype of *C. milii* is yet to be determined, it is likely to comprise mainly microchromosomes like those of its closely related holocephalan, the ratfish (*Hydrolagus colliei*) which contains 29 pairs of dot-like chromosomes resembling the avian microchromosomes<sup>139</sup>. Interestingly, 82 out of 86 *C. milii* scaffolds with homology to



chicken microchromosomes show correspondence to a single chicken microchromosome each (**Supplementary Table VIII.6**). This suggests that the organization of avian microchromosomes might reflect the ancestral genome organization as exemplified by cartilaginous fishes. The remaining four *C. milii* scaffolds are each syntenic to a macro- and a microchromosome of chicken (scaffold\_6: chromosomes 1 and 20; scaffold\_19: chromosomes 4 and 13; scaffold\_45: chromosomes 7 and 17; scaffold\_109: chromosomes 3 and 14) (**Supplementary Table VIII.6**). These split linkages indicate fissions/translocations in the early tetrapod lineage or fusions/translocations in the *C. milii* lineage.

To assess the extent of interchromosomal rearrangements in teleosts, we compared gene clusters on *C. milii* scaffolds corresponding to a single chicken chromosome (hence representing ancestral gnathostome linkage groups) with medaka and zebrafish chromosomes. We identified 10 and 30 *C. milii* scaffolds that each showed correspondence to more than two medaka and zebrafish chromosomes, respectively (**Supplementary Table VIII.7 and VIII.8**). Based on a comparison of medaka and human genomes, it has been proposed that the teleost ancestor contained 13 proto-chromosomes before the 3R, and that there were eight major chromosomal rearrangements after the 3R but prior to the divergence of teleosts<sup>45</sup>. In addition, the zebrafish lineage is thought to have experienced approximately 14 major interchromosomal rearrangements, whereas no major rearrangements occurred in the lineage leading to medaka<sup>45</sup>. In the present study we have identified 8 and 25 additional interchromosomal rearrangements in the medaka and zebrafish lineages respectively, that were missed in the previous study (**Supplementary Table VIII.7 and VIII.8**). For example, “*Ancestral Chr-b*” reconstructed in the previous study<sup>45</sup> is syntenic to medaka chromosomes Ola11 and Ola16. However, a *C. milii* scaffold corresponds to these chromosomes in addition to two other chromosomes (Ola4 and Ola20) (**Supplementary Table VIII.7**). Thus, our comparisons revealed a substantially higher number of interchromosomal rearrangements in the teleost lineage than previously identified based on teleost-tetrapod comparison alone.

## Supplementary Note IX. Evolution of protein domains and gene families

### IXa. Protein domain analysis

Since this is the first cartilaginous fish genome to be sequenced, we carried out detailed characterization of *C. milii* proteins based on their domains and compared them with proteins from various bony vertebrates. This analysis should provide a comprehensive insight into the evolution of protein families in gnathostomes. In addition to *C. milii*, protein sequences from the following representative bony vertebrates were analyzed: human, mouse, cow, opossum, anole lizard, chicken, *X. tropicalis*, zebrafish and stickleback (Ensembl release 65).

### Methods

The proteins were searched against the PFAM database (version 26) using HMMER version 3.0 (<http://hmmer.janelia.org/>) and the number of unique domains in each protein was counted. For genes with multiple isoforms, only the longest protein was considered. As each domain can be represented by more than one profile hidden Markov model, we combined the counts of proteins that mapped to different profile models under the same domain. For each genome, the percentage of proteins that mapped to a particular domain was calculated. The top 100 most abundant protein domains in the *C. milii* are given in **Supplementary Table IX.1**. A comparison of the top 50 protein domains in the *C. milii*, stickleback (a representative teleost) and human (a representative tetrapod) is shown in **Supplementary Fig. IX.1**.

### Results

The *C. milii* genome encodes more proteins containing the immunoglobulin domain and B-box zinc finger domain than stickleback and human, whereas the human genome has an abundance of 7-TM receptor (rhodopsin family), C2H2-type zinc finger, zinc-finger double domain, olfactory receptor, KRAB box, serpentine type 7-TM GPCR chemoreceptor and immunoglobulin C1-set domains. The stickleback genome encodes more proteins with protein-kinase domain, NACHT domain, SPRY and SPRY-associated domain than *C. milii* and human. These comparisons highlight the protein families that have expanded independently in the three lineages.

A notable instance of a domain lost in teleosts is the progesterone receptor (PGR) domain. Even though teleost genomes encode a PGR protein<sup>140</sup>, the PGR domain itself has substantially diverged. This may be related to the fact that while progesterone is the

endogenous ligand for PGR in tetrapods and cartilaginous fishes<sup>141</sup>, 17,20 $\beta$ -DHP and 20 $\beta$ -S are the main ligands for PGR in teleosts<sup>142</sup>. Our analysis also identified six domains shared by *C. milii* and teleost fishes but lost in tetrapods (**Supplementary Table IX.5**). One of these domains, ‘sea anemone cytotoxic protein’ is found in actinoporins, a highly potent family of pore-forming toxins produced by sea anemones<sup>143</sup>. It would be interesting to see what role these pore-forming toxin-like proteins are playing in *C. milii* and teleost fishes.

## **IXb. Evolution of protein-coding gene families in vertebrates**

### **Methods**

#### *Genes lost specifically in tetrapods and teleost fishes*

We used Ensembl Biomart to extract human orthologues of chicken, anole lizard, *Xenopus tropicalis*, zebrafish, medaka, stickleback and fugu genes. Human-tetrapod and human-teleost union sets were prepared from these orthologues. Human-tetrapod orthologues not present in teleost fishes were identified by comparing the human-tetrapod list with the human-teleost list. This ‘tetrapod-specific’ set was compared with elephant shark-human InParanoid orthologues to obtain elephant shark genes present in tetrapods but absent in teleost fishes. To identify genes lost in tetrapods, the zebrafish orthologues of medaka, stickleback, fugu, human, chicken, anole lizard and *X. tropicalis* were extracted from Ensembl Biomart. Zebrafish-teleost and zebrafish-tetrapod union sets were prepared and zebrafish-teleost genes not present in tetrapods were obtained by comparing the two union sets. Comparison of these ‘teleost-specific’ genes with elephant shark-zebrafish InParanoid orthologues highlighted the genes common to elephant shark and teleost fishes but lost in tetrapods. These sets were further refined by BLAST searches against the NCBI NR database and filtering proteins that matched any tetrapod or teleost protein in the respective analysis. The identified genes were annotated by searching for associated human (lost in teleosts) or zebrafish (lost in tetrapods) Gene Ontology (GO, biological process) terms using Ensembl Biomart. Additionally, we looked for the function of these genes by searching literature and databases such as GeneCards (v 3.0; <http://www.genecards.org/>), The Human Protein Atlas (<http://www.proteinatlas.org/>) (for genes lost in teleost fishes) and ZFIN (<http://zfin.org/>) (for genes lost in tetrapods).

#### *Genes absent in bony vertebrates*

We generated a union set of elephant shark InParanoid orthologues from thirteen bony vertebrates (human, mouse, cow, opossum, chicken, anole lizard, *X. tropicalis*, African coelacanth, zebrafish, stickleback, medaka, fugu and *Tetraodon nigrovirilis*). Comparison of this ‘elephant shark-bony vertebrate’ set with elephant shark genes identified a set of elephant shark genes that do not have a bony-vertebrate orthologue. Using custom Perl scripts, protein sequences of these genes were BLAST searched against the NCBI NR database (E-value threshold of  $\leq 1e-5$ ) to exclude genes that had a bony-vertebrate protein as the top hit. The remaining gene set was further curated by BLAST searches against the NCBI NR database and manual inspection of the alignments to exclude low complexity sequences and sequences whose hits included a bony vertebrate in the top 30 hits. To verify that these genes in the elephant shark assembly are not the result of contamination, we looked for their expression in the elephant shark by searching Trinity and Cufflinks RNA-seq transcripts obtained from 10 different tissues. The GO terms for these genes were extracted using Ensembl genome annotation pipeline. Finally, we performed domain prediction using SMART and searched literature to get an idea about the possible functions of these genes.

To identify genes present in tetrapods but lost in teleost fishes, we used the criterion that the gene should be present in human and at least one other tetrapod (chicken, anole lizard or *X. tropicalis*). This set was then compared with elephant shark-human orthologues to obtain the set of genes present in elephant shark and tetrapods but lost in teleost fishes. For the second set, i.e. genes present in elephant shark and teleost fishes but lost in tetrapods, we required that the gene should be present in zebrafish and at least one other teleost fish (medaka, stickleback or fugu). This set was compared to the elephant shark-zebrafish orthologues to obtain the genes present in elephant shark and teleost fishes but lost in tetrapods.

Additionally, manual curation was done to ensure that the identified genes were indeed absent in teleost fishes or tetrapods.

## Results

### Tetrapod-specific gene losses

Functional annotation of the zebrafish orthologues of the 34 genes lost specifically in tetrapods (**Supplementary Table IX.7**) highlighted several genes that are specific to the aquatic lifestyle such as the innate immune system genes, fin and lateral line development genes, and olfactory receptor genes. The immune system-related genes include a member of the finTRIM (fish novel TRIM) family previously identified in teleosts whose expression is

induced by viruses<sup>144</sup>. This gene family has expanded in teleost fishes<sup>144,145</sup> indicating that it plays an important role in innate immunity. This and the other immune system genes found in elephant shark and teleost fishes (cathepsin L.1-like gene, caspase 8-like gene, interferon phi gene and Rho-class glutathione S-transferase gene) are likely to be specific for counteracting aquatic pathogens. Three of the tetrapod-specific losses are related to fin development and include two actinodin genes. A previous study has shown that loss of these actinodin genes in tetrapods is linked to the fin-to-limb transition<sup>146</sup>. The third fin-related gene encodes an uncharacterized protein that is expressed in the zebrafish apical ectodermal ridge, pectoral fin bud and other regions of the fin (ENSDARG00000008732; **Supplementary Table IX.7**). This gene could be of interest in view of the high regeneration capacity of these organs. Two of the tetrapod-specific losses are represented by putative lateral-line genes. One of these (ENSDARG000000089429; **Supplementary Table IX.7**) with expression in the lateral line ganglion and neuromasts of zebrafish encodes an uncharacterized protein. The second (ENSDARG000000086369; **Supplementary Table IX.7**) encodes a fibroblast growth factor receptor 1-like protein, a component of the FGF signaling pathway that has been implicated in lateral line development<sup>147</sup>. The ‘genes lost in tetrapods’ set also includes an olfactory receptor gene which has expanded to a family of 76 genes in zebrafish (**Supplementary Table IX.7**). This gene family belongs to the  $\zeta$  class of olfactory receptors which are specific receptors for aquatic odorants<sup>148</sup>.

### **Invertebrate genes present in *C.milii* but lost in bony vertebrates**

Our analysis identified 27 *C. milii* genes that have homologues in invertebrates but not in bony vertebrates (Supplementary Table VII.8). One of these is the *isopenicillin N epimerase* (*Ipne*) gene found widely in bacteria, fungi and invertebrates such as amphioxus, sea urchin, Pacific oyster, sea anemone and Trichoplax. Thus, this ancient gene has been apparently lost multiple times in invertebrates and vertebrates. The bacterial and fungal IPNEs convert isopenicillin N to penicillin N<sup>149</sup>. To our knowledge, the *C. milii Ipne* gene is the first instance of the presence of a gene involved in antibiotic synthesis in a vertebrate.

An intriguing instance is the cephalotoxin-like gene previously identified only in the cuttlefish, *Sepia esculenta*<sup>150</sup>. The multi-exonic *C. milii* gene encodes a protein with a similar domain organization (transmembrane, EGF, CCP, TSP1 and LDLa domains) to the cuttlefish protein. However, unlike the cuttlefish transcript that is expressed specifically in the posterior salivary glands, we observe multi-tissue expression (gills, intestine, kidney, liver, muscle,

spleen and testis) in *C. milii*. Further detailed searches identified ESTs for this gene in the spiny dogfish, *Squalus acanthias* (accession number EC093606.1) and the marbled lungfish, *Protopterus aethiopicus* (FL669404.1 and FL669393.1) indicating its presence in a lobe-finned fish lineage besides cartilaginous fishes. Additionally, we searched the whole-genome sequences of the sea lamprey, African coelacanth, spotted gar and teleost fishes (zebrafish, medaka, stickleback, tilapia, *Tetraodon* and fugu) by TBLASTN using cuttlefish and *C. milii* protein sequences as queries. However, we did not find any homologs in these genomes. The intriguing pattern of distribution of this cephalotoxin-like gene raises questions about the origin of this gene in vertebrates: was it transferred horizontally from cuttlefish to the gnathostome ancestor (prey to predator) and subsequently lost multiple times in gnathostomes or is it an ancient gene that has been lost multiple times in invertebrates and vertebrates? Analysis of additional invertebrate and vertebrate genomes should clarify the origin of this unusual gene. In any case, the presence of cephalotoxin-like protein may explain why there is only one known predator of *C. milii*, the sevengill shark<sup>151</sup>.

### **IXc. Olfactory and vomeronasal receptor genes**

#### *Olfactory receptor genes*

Olfaction is vital for finding food, choosing mates and identifying offspring, and avoiding predators. Olfactory receptors (ORs) are responsible for detection of odorant molecules present in the environment. Vertebrate ORs belong to the rhodopsin-like G protein-coupled receptor (GPCR) superfamily, which is the largest family within the GPCRs. These proteins contain seven transmembrane  $\alpha$ -helices typical of all GPCRs. Genome-scale analyses have revealed the presence of OR-like genes not only in vertebrates, but also in the nonvertebrate chordate amphioxus<sup>148</sup>. These studies have shown that the repertoire of OR genes within different groups is highly variable. Among mammals, humans contain 387 functional OR genes whereas opossum, rats and mice contain 1188, 1207 and 1035 functional OR genes, respectively<sup>152</sup>. Among non-mammalian vertebrates, chicken, *Xenopus* and zebrafish possess 211, 824 and 154 functional OR genes respectively, whereas the jawless vertebrate sea lamprey contains 32 functional OR genes<sup>148</sup>. Among the nonvertebrate chordates, amphioxus contains 31 functional OR genes, whereas tunicates, the closest phylogenetic group of vertebrates, lack vertebrate-type OR genes<sup>148</sup>. Previously, six OR-like genes have been identified from the 1.4 $\times$  assembly of elephant shark including three which were truncated<sup>148</sup>. The availability of a high-quality assembled genome sequence of *C. milii* provided an

opportunity to perform a genome-wide search in elephant shark to uncover its OR gene repertoire.

Olfactory receptor-like (OR-like) genes were searched in the *C. milii* genome by TblastN using representative OR proteins as query and an E-value cut-off of 1e-10. Aligned regions in the genome identified by TblastN were extracted with an additional 1 kb region on both 5' and 3' ends. The extracted sequences were used for BlastX against the NCBI non-redundant (nr) database to identify putative ORs. Amino acid sequences (longest open-reading frame) were extracted for the same region and were used for domain prediction using the SMART web-server<sup>153</sup>. A multiple alignment was then generated using the putative elephant shark OR-like genes and known ORs from a previous study<sup>148</sup> using the E-INS-i strategy as implemented in MAFFT version 6.864b<sup>154</sup>. Gaps in the alignment were removed using Gblocks<sup>86</sup>. A neighbor-joining tree was generated for the trimmed alignment using ClustalW (**Supplementary Fig. IX.2a**). Sequences which did not fall within a Type 1 or Type 2 clade were not considered an OR-like gene. In total, we could identify 6 OR-like genes (CmOR1, CmOR2, Cm-theta1, Cm-theta2.1, Cm-theta2.2 and Cm-kappa1) in the elephant shark genome. These genes are the same as those identified in a previous study<sup>148</sup>, but the availability of a high quality genome assembly enabled us to obtain full-length sequences for the three truncated OR-like sequences. Of the six OR-like genes identified in elephant shark, only two are real ORs (CmOR1 and CmOR2). The remaining genes belong to groups  $\theta$ 1,  $\theta$ 2 or  $\kappa$  and it has been suggested that these groups are non-ORs<sup>148</sup>. CmOR1 lies within the Group  $\eta$  (eta) clade, whereas CmOR2 belongs to Group  $\zeta$  (zeta) - both these groups are likely to be specialized for detection of water-soluble odorants<sup>148</sup>.

Overall, *C. milii* contains the least number of OR genes among vertebrates. The small number of OR genes in *C. milii* could be related to its greater reliance on electroreceptors rather than ORs for seeking food on the ocean floor. *C. milii* possesses a characteristic fleshy, plough-shaped snout that is studded with ampullae of Lorenzini (electroreceptors) (**Supplementary Fig. IX.2b**). The snout is used to detect bioelectric fields generated by buried crustaceans, molluscs, echinoderms, and polychaetes<sup>155</sup>. Interestingly, the monotreme platypus possesses known electroreceptor capabilities in the bill and displays a similar distorted ratio of olfactory to vomeronasal receptor genes<sup>156</sup>.

#### *Vomeronasal receptor genes*

Besides the main olfactory system (MOS), many tetrapods possess an accessory olfactory system known as the vomeronasal system (VNS). Central to the VNS is the vomeronasal or Jacobson's organ (VNO) located in the nasal cavity and the accessory olfactory bulb (AOB) located in the brain. The VNO has sensory neurons expressing vomeronasal receptors that are responsible for detection of intraspecific pheromonal cues and some environmental odors<sup>157</sup>. Unlike tetrapods, which have two anatomically segregated olfactory tissues/organs (main olfactory epithelium and VNO), fishes have a single olfactory organ known as the olfactory rosette. Interestingly, although morphological traits of the VNS are found only in tetrapods, VNS related genes have been identified in teleost fishes<sup>158,159</sup>. In chondrichthyans, the olfactory organs are located in laterally placed cartilaginous chambers or sacs on the ventral surface of the head, anterior to the mouth<sup>155</sup>. Like teleost fishes, there is no distinct VNO in elephant shark. However, genes that express specifically in the VNS have been identified previously in elephant shark<sup>160</sup> suggesting that, like teleost fishes, two separate olfactory signaling pathways (main and vomeronasal) exist in cartilaginous fishes as well despite the absence of an anatomically distinct VNO.

The mammalian vomeronasal family can be subdivided into two subfamilies – vomeronasal receptor family 1 and 2 (V1R and V2R, respectively). Since teleost fishes do not have a VNO, it has been proposed that teleost V1R-like genes be termed as *ora* (ORs related to class A GPCRs) and V2R-like genes as *OlfC* (ORs related to class C GPCRs)<sup>161,162</sup>. Genomic surveys have revealed a considerable amount of variation in the number of vomeronasal receptor genes within different vertebrate groups. Rodents such as mouse and rat possess a large number of intact V1R (187 and 106, respectively) and V2R (70 and 59, respectively) genes. Opossum also possess a large number of intact V1R and V2R (98 and 79, respectively) genes. However, humans have lost all functional V2R genes and only retain five intact V1R genes. These five genes are likely to be remnants of an ongoing pseudogenization process in humans<sup>163,164</sup>. On the other hand, chicken, which does not possess a VNO, appears to lack both V1R and V2R genes. Within amphibians, the western clawed frog possesses 21 V1R and the largest number of V2R genes (249) amongst the vertebrates<sup>163</sup>. Amongst teleost fishes, pufferfishes contain just a single intact V1R-like gene, whereas zebrafish contains two intact V1R-like genes. The number of intact V2R-like genes is 4, 18 and 44 for *Tetraodon*, fugu and zebrafish, respectively<sup>163</sup>. In Atlantic salmon, 29 intact *OlfC* (V2R-like) genes were identified<sup>165</sup>. Mining of the 1.4× assembly of the elephant shark genome identified two V1R-



like and 32 partial V2R-like sequences<sup>160</sup>. Here we report the full complement of vomeronasal receptor genes in the elephant shark.

Vomeronasal receptor genes were searched in the elephant shark genome by TBLASTN<sup>166</sup> using representative V1R and V2R sequences. Extracted regions of homology were BLASTX-searched against the NCBI non-redundant database to identify putative vomeronasal receptors. Partial V2R amino acid sequences identified previously<sup>160</sup> were also used as query. A multiple alignment was generated using MAFFT version 6.864b (E-INS-i strategy)<sup>154</sup> for the putative V1Rs and V2Rs together with sequences of previously identified vomeronasal receptors from zebrafish and sea lamprey. Non-OR GPCRs were used as outgroups. A neighbor-joining (NJ) tree was built using MEGA5<sup>106</sup> with Poisson distance correction and 1000 bootstrap replicates for node support (**Supplementary Fig. IX.3**). Our analysis identified four V1R-like and 33 *OlfC* (V2R-like) genes in the elephant shark genome. Of the 33 *OlfC* (V2R-like) genes, one gene (SINCAMP00000008707) is orthologous to zebrafish *OlfCx* genes while another gene (SINCAMP000000025729) is related to zebrafish *OlfCc1* gene. The remaining 31 genes formed two separate clades comprising 25 and six genes within the *OlfC*/V2R clade suggesting that these genes have expanded in the elephant shark. Thus, unlike the limited number of olfactory receptor genes, the elephant shark possesses a large repertoire of vomeronasal receptor genes similar to teleost fishes. This presumably reflects the diverse pheromones employed by aquatic vertebrates for attracting mates and for warning conspecifics regarding potential predators and other dangers. Since fertilization is internal in elephant sharks, sex pheromones in particular may play an important role in attracting mature males to gravid females.

### Supplementary Note X. Genes involved in bone formation

To determine whether *C. milii* contains the major genes involved in bone formation, we catalogued the genes that are known to be involved in bone formation and maintenance (**Supplementary Table X.1**) and searched for their orthologues in the *C. milii* genome. Starting from signaling pathways and their components that are involved in specification, commitment, patterning and proliferation of skeletal cells (chondrocytes, osteoblasts and osteoclasts), followed by regulatory transcription factors that define and control the behavior of these cell types, and finally the battery of differentiation genes directly involved in the deposition of the matrix that forms cartilage and bone. In the process, we discovered that almost the entire set of cartilage and bone formation genes are present in *C. milii* (**Supplementary Table X.1**), except for a family of genes called the *secretory calcium-binding phosphoprotein* (SCPP) genes that were derived from tandem duplications of the *Sparc11* gene.

#### ***BMP signalling***

Discovered for their ability to induce bone formation, BMP ligands control a diverse array of processes during bone development, including formation of mesenchymal condensations, differentiation of osteoblasts and coordination of the three-dimensional patterning of skeletal elements. We searched for the genes that alter the extracellular BMP gradients (*Noggin*, *Chordin*, *Follistatin*, *Gremlin*) and genes that encode BMP ligands (*Bmp2*, 4, 5, 6, 7), their receptors (*BmprI*, *BmprII*), intracellular transducers (*Smad1*, 4, 5, 6, 7, 8; *Smurf1*, 2), and found that they are intact in the *C. milii* genome (**Supplementary Table X.1**).

#### ***Hedgehog signalling***

Indian Hedgehog (Ihh), a member of the vertebrate Hedgehog (Hh) family of ligands involved in homeostasis of the intestinal epithelium, is also required for endochondral bone development, controlling chondrocyte proliferation and maturation<sup>167</sup> as well as osteoblast development<sup>168</sup>. Perturbations in Ihh signalling impair long bone development in murine models and in humans<sup>168</sup>. Ihh functions through signaling components that are shared by all Hh ligands (Sonic-, Desert- and Indian Hedgehog), and Ihh activity in chondrogenesis is mediated by the parathyroid hormone signalling pathway (see below). *C. milii* possesses all three Hh genes found in mammals. It also contains genes for the components controlling the modification, release and movement of Hh ligands (*Hhat*, *Dispatched1*, *Scube2*, *Scube3*, *Hhip*, *Ext1*, *Ext2*, and *ExtL3*), their reception at the membrane and endocytosis (*Gas1*, *Cdo*,

*Ptc1*, *Ptc2*, *Gpc3*) as well as their intracellular transduction (*Smo*, *Kif7*, *Sufu*, *Pka*, *Evc*, *Evc2*, *Gli1*, *Gli2*, *Gli3*)<sup>169</sup>. Therefore, we conclude that components of the Hh signal transduction machinery are present and functional in *C. milii*.

### ***Parathyroid signaling***

The parathyroid gene family consists of two members, *Parathyroid hormone (PTH)* and *Parathyroid hormone-related protein (PTHrP)*. PTH has major roles in calcium homeostasis, where it acts to release calcium from bone and restricts its excretion via the kidney<sup>170</sup>. PTHrP on the other hand has a developmental role during endochondral ossification downstream of *Ihh*. *Ihh* prevents chondrocyte hypertrophy by positively regulating PTHrP expression, thereby maintaining a chondrocyte population capable of proliferation<sup>167</sup>. In addition, *Ihh* plays a distinct and possibly direct role in maintaining proliferation to produce long bones<sup>168</sup>. The lack of chondrocyte proliferation or their unscheduled hypertrophy results in premature differentiation of the cartilage without sufficient growth, resulting in shorter bones. We previously reported on the detailed characterization of the *Pth* gene family in *C. milii* and showed that *C. milii* retains three *Pth* gene family members, one of which (*Pth2*) was lost in the lineage leading to bony vertebrates<sup>171</sup>. In addition, we find distinct orthologues of Pth receptors, *Pthr1* and *Pthr2*, in the *C. milii* genome. These findings preclude the simple association of loss of endochondral bones in cartilaginous fishes to the evolution of the PTH gene family.

### ***FGF signalling***

FGF signalling was first implicated in skeletal development by the finding that gain-of-function mutations in their receptors resulted in reduced growth of long bones and achondroplasia, the most common form of dwarfism in humans<sup>170</sup>. Since then, a number of genetic studies from mice and human patients have implicated FGF signalling in almost every step of dermal and endochondral bone formation, including the modulation of chondrogenesis. We found intact copies of genes for FGF ligands (e.g. *Fgf1*, *Fgf23* and *Fgf2*), their receptors (*Fgfr1*, *Fgfr2*, *Fgfr3* and *Fgfr4*) and downstream mediators (*Ras*, *Rac1*, *Raf1*, *Mek*, Map-kinases, *Jnk*, *p38*, *Erk1* and *Erk2*), all implicated in skeletal development, in the *C. milii* genome.

### ***RANK-RANKL-OPG pathway***

Bone acts as a major source of calcium and goes through cycles of deposition and resorption. Resorption is largely coordinated by osteoclasts through the RANK-RANKL-OPG pathway. Osteocytes and osteoblasts secrete a bone-dissolving factor called RANKL that binds to its receptor RANK on the surface of osteoclasts and their progenitors. This in turn leads to the activation of osteoclasts resulting in bone resorption. To fine-tune this process of resorption, the bone-forming cells also secrete OPG, which acts to antagonize this pathway by binding to the RANKL ligand, thereby preventing it from binding RANK on osteoclasts. The *C. milii* genome contains genes for all three of these molecules.

### ***Transcription factors***

A number of transcription factors are known to play regulatory roles in the formation and maintenance of cartilage and bone. These include Sox5, Sox6 and Sox9 which together initiate and orchestrate the formation of cartilage. Other factors such as Bapx1, Sp7, Sp3, Atf4, Twist1, Twist2, Sox8, Atf4, Mef2c, c-FOS, Msx1 and Msx2 play important roles in bone development. We found genes for all of these factors in the *C. milii* genome, including the master regulator for bone development *Runx2*. We also found orthologues of factors that control the differentiation of osteoclasts, *Nfatc1*, *Pu.1/Spi-1*, and *Mitf*.

Orthologues for genes encoding other factors that have been implicated in the modulation of bone strength by genome-wide association studies, like *Zbtb40*, *Ahsg*, *Sqstm1*, *Lrp5*, *Gpr177* and *Axin1* (the latter three are Wnt pathway components) are also found in *C. milii*.

Retention of the above-mentioned genes (signalling pathway components and *trans*-factors) in *C. milii* does not come as a surprise, as homologues of many of these pathway components and factors are used for the formation and patterning of diverse tissue types even in invertebrates. The rationale for searching these genes was to determine if there was a specific loss of components that largely seem dedicated to bone development.

### ***Bone and cartilage differentiation genes***

We next looked for the presence of downstream genes that participate in the terminal differentiation of skeletal cells, their deposition and modulation of extracellular matrix. It is possible that the lack of bone in cartilaginous fishes could be due to some deficiencies in the cartilage that impedes subsequent deposition of bone. Therefore, in addition to genes

involved in bone formation, we also searched for genes participating in cartilage differentiation.

### *Proteoglycan genes*

Proteoglycans constitute important regulators for the formation of cartilage and bone. We found intact orthologues for almost all the genes in the following proteoglycan categories - SLRP gene family clusters (*Fmod*, *Prelp* and *Optc*; *Ecm2*, *Aspn*, *Omd* and *Ogn*; *Dcn*, *Lum*, *Kera* and *Epyc*; *Bgn* but no *Ecm2l*), the lectican-HAPLN gene family clusters (*Hapln2* and *Bcan*; *Vcan* and *Hapln1*; *Acan* and *Hapln3*; *Ncan* and *Hapln4*) and other non-clustered proteoglycans (*Fn1*, *Lepre1*, *Tuft1*, *Podn*).

### *Cartilage genes*

We were also able to find genes that are involved in cartilage formation such as *Col2a1* (Type II), *Col11a2* (Type XI), *Matrilin-1*, *-3*, *Mmp1*, *Mmp13*; genes modifying chondroitin sulfate (*GalNAc4S-6ST*) and heparin sulfate (*Hs2st*); *Cspg4*, *Cspg5* and *Chad* in the *C. milii* genome.

### *Bone differentiation genes*

In order to identify genes involved more specifically in bone differentiation, we started by looking for genes encoding proteins that constitute a large portion of the bone matrix. These include *Type I collagen* (*Col1a1* and *Col1a2*), *type X collagen* (*Col10a1*), *osteocalcin* (*Bglap*), *Mgp* (*Bglap* and *Mgp* are closely linked as in teleosts), and *alkaline phosphatase*. All these genes are intact in *C. milii*. Additionally, we could also find other bone-specific genes like *ankylosis protein* (*Ank*), *Alox12*, *Bmp1*, *Cd44*, *Fam20C* (duplicate copies), *fibromodulin*, *osteoglycin*, *Calcium-sensing receptor* (*Casr*), *osteopotential*, *osteocrin*, *osteoglycin*, *Sost*, *Sostdc1*, *Phex*, *Crtap*, *Cant1*, *Phospho1*, *Phospho2*, *Atp2b1*, *Enpp1*, *Sptbn1*, *Adamts18*, *Rspo3*, *Galnt3*, *Fam3c*, *Xylt1*, *Ext2*, *Papst1*, *Uxs1*, *Has2* and *Entpd5*.

### *Secretory calcium-binding phosphoprotein (SCPP), Sparc and Sparcl1 gene family*

The survey of SCPP genes in teleosts, birds, reptiles and mammals has revealed a close correlation between the complexity of mineralized tissues and the repertoire of SCPP genes. This in turn has led to the hypothesis that the gain and specialization of SCPP genes may have supported the evolution of diverse mineralized tissues in distinct bony vertebrate lineages<sup>172,173</sup>. What has remained unclear, however, is the genetic composition of SCPP

genes in cartilaginous fishes, the sister group of bony vertebrates, that lack endochondral bone<sup>174</sup>. We carried out an extensive search for *Sparc*, *Sparc11* and *SCPP* genes in the *C. milii* genome.

The *C. milii* genome contains both *Sparc* and *Sparc11* genes. However, there is neither SIBLING nor other SCPP gene in the *Sparc11* or *Sparc* locus of *C. milii* (**Supplementary Figs. X.1 and X.2**). To verify whether there is an SCPP gene elsewhere in the *C. milii* genome, we did a relaxed search ( $E < 10$ ) of the *C. milii* genome assembly using TBlastN but did not identify any convincing homologues. Interestingly, in mammals and amphibians the non-clustered SCPP gene, *AMEL*, is located in an intron of *ARHGAP6* gene. Although *C. milii* genome contains an orthologue of the *ARHGAP6* gene, its introns do not contain any gene.

To verify if other cartilaginous fishes contain SIBLING or SCPP genes, we searched genomic resources of cartilaginous fishes available in the public domain. This includes 26× coverage survey sequence of the little skate (*Leucoraja erinacea*)<sup>175</sup>, ESTs from the embryonic stages of little skate, small-spotted catshark (*Scyliorhinus canicula*) and *C. milii* (~300,000 ESTs)<sup>175</sup>; and elasmobranch ESTs in the NCBI database (~82,000 ESTs). However, we did not find any homologs of SIBLING or SCPP genes in these datasets. We also searched the jawless vertebrate genome resources comprising lamprey and hagfish ESTs in NCBI, and the genome assembly of sea lamprey (Pmarinus\_7.0, January 2011), and could not identify any homologues of SIBLING or Pro/Gln-rich SCPP genes. However, in the sea lamprey, we did find two copies of *Sparc* (*SparcA* and *SparcB*; accession numbers ABM21522.1 and ABM21524.1) but no *Sparc11*. Thus, the lack of SIBLING and other SCPP genes is common to all chondrichthyans and jawless vertebrates.

### **Functions of SIBLING proteins**

The five mammalian SIBLING proteins constitute a significant fraction of the organic matter in bone. Yet their functions, as assayed by single gene knockouts in mice that have resulted in mild phenotypes, have been difficult to interpret. This has been attributed to compensatory and/or redundant mechanisms provided by the five proteins in bone deposition and resorption. Two trends emerge from the analysis in the mouse model: *Dmp1*, *Mepe* and *Ibsp* positively modulate mineralization in dentine and bone, whereas *Dspp* and *Spp1* do so negatively<sup>176</sup>. Nevertheless, it is clear that SIBLING proteins strongly associate with

hydroxyapatite and modulate mineral crystallization. A distinct role for SIBLING proteins in direct binding to collagen fibrils and initiating their mineralization has been suggested based on *in vitro* experiments (reviewed in <sup>176,177</sup>). Further support for a critical role of SIBLING genes in ossification comes from unbiased genome-wide association studies (GWAS). Variations in *SPPI*, *MEPE* and *IBSP* loci are strongly associated with bone mineral density and fracture risk in humans <sup>178-180</sup>. The retention/expansion of different complements of *SIBLING* genes in different vertebrate lineages also suggests redundant and compensatory function amongst the mammalian SIBLING proteins.

### ***Knockdown of spp1 in zebrafish***

We genetically interfered with the function of the single bone-specific SIPP gene, *spp1* (also known as *osteopontin* or *opn*) in zebrafish by using two different methods: antisense morpholino-mediated knockdown and targeted genetic modifications using the CRISPR/Cas system<sup>181</sup>. Antisense morpholinos were targeted to either the ATG translation start site or the exon2-intron2 (E2-I2) splice junction of *spp1* pre-mRNA. The CRISPR/Cas system was used to target either exon 6 exon 7, or both exons; in the latter situation, large deletions in the order of ~2.6 kb are expected.

### **Methods for morpholino knockdown**

Adult zebrafish (wild type AB strain) were maintained on a 14 hour light/10 hour dark cycle at 28°C in the Agri-Food & Veterinary Authority (AVA, Singapore)-certified IMCB Zebrafish Facility. Fish were raised according to the guidelines of the IMCB fish facility and the Biopolis IACUC protocol #100520. Morpholinos targeting ATG (ATG MO) or the junction of 2<sup>nd</sup> exon and intron (E2-I2 MO) of zebrafish *spp1* gene were designed and injected into 300 to 400 1-2 cell stage zebrafish embryos per day on two or more days. Either 1 nl or 2 nl of a 0.75 mM morpholino solution was injected. The sequences of the morpholinos used are as follows (lower case letters in control MO denote mismatches to their knock down MOs):

Spp1-ATG-1 (GTGTGCAAATATTCTGCTCTCTCT),  
Spp1-E2-I2 (ACTGATTGTGAACCTTACAGGTACAC),  
Cntrl-Spp1-ATG (GTcTcCAAAtTATTgTGgTCTCTCT),  
Cntrl-Spp1-E2-I2 (ACTcATTcTcAACTTAgAcGTACAC).

The inhibition of splicing by E2-I2 MO was verified by RT-PCR using a combination of 3 primers (P1, exon 2 forward; P2, intron 2 reverse; and P3, exon 3 reverse) (**Supplementary Fig. X.5**). One microgram of total RNA extracted from pools of 10 embryos (4-dpf or 5-dpf) was used to synthesize cDNA with SuperScript® III Reverse Transcriptase (Invitrogen, Carlsbad, USA). The cDNA was used in a PCR reaction with the following primers: zfSPPEx2F1, 5' GCACACAAAATGAAATCTATTATTG 3' (Exon 2 forward); zfSPPIIn2R1, 5' GCTAAGAAGCTGATTGTGAACTTAC 3' (Intron 2 reverse); zfSPPEx3R1, 5' CCCGTTGAACAATTACAAGCTCTTC 3' (Exon 3 reverse). PCR was performed using DyNAzyme (Finnzymes, Finland) using the following cycling conditions: 35 cycles of 95°C for 30s; 58°C for 1 min; 72°C for 20s; followed by a final extension of 72°C for 5 min.

### Methods for CRISPR/Cas mediated genetic modifications

The Cas9 nuclease expression vector (pMLM3613) and the single guide RNA (sgRNA) expression vector (pDR274) were obtained through the nonprofit reagent distribution service Addgene (<http://www.addgene.org/crispr/jounglab>). Target sites and corresponding oligonucleotide pairs were selected and designed using the ZiFiT Targeter software (<http://zifit.partners.org/>) for exons 6 and 7 of the *zfspp1* gene.

Exon 6: Target site (forward strand): GGAATCTGAAACAGATGAGA

Oligo 1: **TAGGAATCTGAAACAGATGAGA**

Oligo 2: **AAACTCTCATCTGTTTCAGATT**

Exon 7: Target site (reverse strand): GGTAGCCCAAACACTGTCTCCC

Oligo 1: **TAGGTAGCCCAAACACTGTCTCCC**

Oligo 2: **AAACGGGAGACAGTTTGGGCTA**

Bold: complementary bases for annealing; underlined: overhang for cloning into the *BsaI*-digested pDR274 (sgRNA expression vector).

Customized sgRNA expression vectors were obtained by cloning the annealed oligonucleotides into *BsaI*-digested pDR274 vector; integrity of the clones was confirmed by sequencing. *DraI*-digested sgRNA expression vectors were transcribed using the MAXIscript T7 Kit (Life Technologies). Following DNaseI treatment, the sgRNAs were purified using ammonium acetate-ethanol precipitation. The Cas9 expression vector was digested with *PmeI* and transcribed using the mMESSAGING mMACHINE T7 ULTRA Kit (Life Technologies). Poly(A) tailing and DNaseI treatment were performed according to manufacturer's



instructions followed by lithium chloride precipitation for the Cas9-encoding mRNA. Approximately 200 to 300 one-cell stage zebrafish embryos were injected on two different days with 1 nl or 2 nl solution containing ~12.5 ng/ $\mu$ l sgRNA and ~300 ng/ $\mu$ l Cas9 mRNA<sup>181</sup>. The following combinations of sgRNA(s) and/or Cas9 mRNA were used:

1. *zfspp1* exon 6 sgRNA + *Cas9* mRNA
2. *zfspp1* exon 7 sgRNA + *Cas9* mRNA
3. *zfspp1* exon 6 + exon 7 sgRNAs + *Cas9* mRNA (this should cause a deletion of ~2.6 kb)
4. *zfspp1* exon 7 sgRNA alone (control)
5. *Cas9* mRNA alone (control)

Tail clips of normally developing embryos were used for isolation of genomic DNA for genotyping. We used the GoTaq<sup>®</sup> Green 2 $\times$  Master Mix (Promega, USA) for genotyping PCR. The following genotyping primers were used:

- (1) *zfspp1*\_exon 6\_F1: CACGTCAATGCACTCCCACAACAG
- (2) *zfspp1*\_exon 6\_R1: CGACTCAAACCCATAACCTTGGCAC
- (3) *zfspp1*\_exon 7\_F1: CGACCAGTGACATTTACAGTGTTGC
- (4) *zfspp1*\_exon 7\_R1: CTACTCCCGAGCTAAAACCACTACAG

Expected product sizes for exon 6 and exon 7 primer pairs from wild-type sequence are 315 bp and 487 bp, respectively. The expected size for a double deletion when using both exon 6 and 7 sgRNAs is ~450 bp (primers #1 and #4). PCR products were purified and cloned into pGEM<sup>®</sup>-T Easy vector (Promega, USA). Multiple clones were sequenced using the BigDye<sup>®</sup> Terminator Cycle Sequencing Kit (Applied Biosystems, USA) on ABI 3730xl capillary sequencers (Applied Biosystems, USA).

### Staining embryos

Five-day old live zebrafish embryos were stained using Alizarin red (Sigma Aldrich, Sweden) that binds to mineralized matrix and fluoresces in the red spectrum. Live embryos were incubated overnight in 30 ml of “fish water” containing 200  $\mu$ l of 0.5% Alizarin red<sup>182</sup>. Embryos were then rinsed in “fish water” and anesthetized using tricaine (Sigma Aldrich, Sweden). The Alizarin red stained embryo was observed under a compound microscope (Axio imager M2; Carl Zeiss, Germany) and imaged using an attached digital microscope

camera (Axiocam; Carl Zeiss, Germany). All manipulations were done on entire images in ImageJ software (National Institutes of Health, USA). RNA *in situ* hybridization for *spp1* expression and Alcian blue staining for visualizing cartilage were done as previously described<sup>183</sup>. The mutants were scored as either ‘normal’ (resembling wild types), ‘mild’ bone-phenotype or ‘strong’ bone-phenotype with the latter showing the most reduction of bone.

## Results

RNA *in situ* hybridization in embryos from 1 to 5 dpf showed that *spp1* is expressed specifically in cells surrounding the bone matrix starting from 2 dpf (**Supplementary Fig. X.3**) and precedes the deposition of bone. This provides support for its role in the deposition of bone. We note that the zebrafish *spp1* loss-of-function phenotype observed in our study (**Fig. 4; Supplementary Fig. X.4, X.6 and X.9**) is in contrast to the mouse *Spp1* knockout phenotype, which shows an increase in bone formation<sup>184</sup>, possibly because of redundancy and compensation within the SIBLING gene family in mammals<sup>176,185</sup>.

Brightfield images of *Cas9* mRNA and sgRNA injected embryos showed that their overall development is comparable to that of wild type embryos (**Supplementary Fig. X.7**). Alcian blue staining of cartilage showed that despite reduction in bone formation, cartilage formation in morpholino injected embryos (**Supplementary Fig. X.5**) and *Cas9* mRNA+ sgRNA injected embryos was similar to that in wild type embryos (**Supplementary Fig. X.5 and X.8**).

## Supplementary Note XI. Analysis of the immune system of *C. milii*

### XI.1 Strategy of analysis

The genome assemblies of *C. milii* and the transcriptomes derived from several organs (see **Supplementary Note I**) were interrogated for the presence or absence of representative genes relevant to mammalian innate and adaptive immune facilities. Human sequences were used as initial queries and subsequently complemented by sequences of teleost and chondrichthyans (cartilaginous fishes) as required. When the *C. milii* databases indicated the potential absence of relevant sequences, the thymus and spleen transcriptomes of the nurse shark *Ginglymostoma cirratum* (see **Supplementary Note I**) and the databases of other cartilaginous fishes (little skate, catshark and dogfish)<sup>175</sup> were additionally examined.

### XI.2. Antigen recognition

#### XI.2.1. Antigen receptor genes

**Key features** The structures of *Ig* and *TCR* genes in *C. milii* are similar to their counterparts in other cartilaginous fish. The close linkages of *IgH* and the *TCR* alpha/delta loci, and that of *IgH* and *MHC* (suggested by the linkage of *IgM* and *Trim69* genes) appear to be ancient features of gnathostome genomes. Furthermore, *IgL* genes are situated next to *MHC* paralogous genes, indicating that the *IgL* precursor was located near the primordial *MHC*; this ancestral linkage has been lost in bony vertebrates.

#### XI.2.1.1 Immunoglobulin genes

##### XI.2.1.1.1. *IgH* genes

Cartilaginous fish *IgM* genes are found in the so-called cluster organization, instead of the translocon arrangement seen in tetrapod species<sup>186</sup>. The apparent number of *IgM* loci in *C. milii* as revealed by genomic hybridization analysis using CH4 domain sequences as probes (**Supplementary Fig. XI.1**) is consistent with corresponding BLAST searches, in which 32 scaffolds gave positive hits (scaffolds 54, 121, 290, 325, 1166, 1253, 1290, 1436, 1549, 1564, 1570, 1816, 1861, 1873, 2013, 2158, 2427, 2476, 2666, 2709, 2843, 3307, 3412, 3547, 4561, 4836, 4891, 4913, 5858, 6954, 9077, 9876); these results suggest that the *C. milii* genome encodes about twice as many *IgM* loci than that of the nurse shark *G. cirratum*, which possesses about 15 *IgM* loci<sup>187</sup>. The distribution of *IgM* genes in the *C. milii* genome is not known, although two genes are found on scaffold\_121. The *Trim69* gene of *C. milii* is found next to an *IgM* gene on scaffold\_325. Interestingly, *Trim69* maps next to the gene encoding

$\beta$ 2-microglobulin (the light chain of the MHC class I complex) in the human genome<sup>188</sup>; in nurse shark, the  $\beta$ 2-microglobulin gene maps to the MHC locus<sup>189</sup>.

Based on their VH sequences, three types of IgM genes were found that are quite similar to those of another holocephalin, *Hydrolagus*, which diverged from *C milii* ~170 million years ago<sup>190</sup>. (i) There are approximately 10 conventional IgM genes, with spacer sequence lengths in recombination signal sequences (RSS) identical to all other cartilaginous fish genes (V23, 12D23, 12D12, 23J). (ii) One unconventional IgM gene appears to encode a single-chain IgM, likely orthologous to the one first found in *Hydrolagus*. The VH domain lacks amino acids critical for association with VL domains, and the CH1 domain is similar in sequence to the CH2 domain, suggesting that the original CH1 domain exon was lost and replaced by a CH2 duplication. This putative single-chain IgM is found only in the holocephalins, and may have been superseded by the IgNAR class found in all elasmobranchs (see below). (iii) There are many ‘orphan’ VH genes, apparently lacking downstream CH exons; maintenance of open-reading frames in most of these genes suggests a novel function for these loci.

In addition to IgM genes, cartilaginous fish possess alternative immunoglobulin heavy chain genes<sup>191</sup>. Interestingly, no evidence for genes encoding the IgNAR and IgW isotypes could be found in the *C. milii* genome, despite the fact that V elements of the NAR-TCR isotype are present<sup>44</sup>, linked to *IgM* genes. This may suggest that a single-domain V element evolved as a component of a TCR-like gene and was only subsequently transferred to an Ig-like gene. The NAR-TCR genes are linked to the TCR alpha/delta locus<sup>44,192</sup>, and one VH fragment was found among a cluster of TCRalpha/delta V genes (scaffold\_220); moreover, there is one CH domain downstream of this VH element. At the end of scaffold\_220, another VH domain was found; this is part of a conventional IgM gene that contains at least VH-CH1-CH2-CH3-CH4 and is situated in opposite orientation relative to the TCRalpha/delta V cluster. This is compatible with close linkage of TCRalpha/delta locus to IgH or IgH elements in many non-placental mammals, birds, and *Xenopus*<sup>193-195</sup>.

#### XI.2.1.1.2. *IgL* genes

Four isotypes of immunoglobulin light chain have so far been found in cartilaginous fishes; the kappa, lambda and sigma isotypes are present in all cold-blooded vertebrates; the sigma-prime, a so-called “dead-end” isotype has been found only in cartilaginous fishes<sup>196</sup>. Out of

four isotypes, we identified three IgL types from the *C. milii* genome; IgL sigma was not detected.

We found ~20 IgL lambda genes, as judged by the presence of adjacent V and C domains (on scaffolds 215, 221, 1021, 1159, 2856, 3081, 3848, 5255, 20085); as in all cartilaginous fishes<sup>197</sup>, lambda genes encode “germline-joined” V domains, possibly indicating that lambda genes might be related to the primordial V domain subject to RAG transposon insertion. Two IgL kappa genes were identified in scaffold\_101; both V domains are not germline-joined and their RSS are similar to other vertebrate IgL kappa genes. Only a constant domain was identified for the IgL sigma-prime gene on scaffold\_3225.

#### XI.2.1.2. T cell receptor genes

As expected, all four types of T cell receptors were found in the *C. milii* genome. With the exception of TCR gamma, they are found on small scaffolds. The TCR gamma gene (situated between nt. ~1870000 and 1900000 on scaffold\_83) is flanked by the orthologous genes found on *H. sapiens* chromosome 7p14, indicating conserved synteny between *C. milii* and human, with the exception of a block inversion. As expected, the TCR gamma gene is in translocon organization, having a V cluster upstream of at least one J and one C domain; the recombination signal sequences (RSS) conform to the pattern found in all other vertebrate TCR gamma genes (23 bp spacer for V, 12 bp spacer for J elements)<sup>198</sup>. Similar to all other vertebrate species, the TCR alpha/delta genes appear to be adjacent in the *C. milii* genome, as evidenced by the interspersed Valpha and Vdelta genes; however, the exact architecture of the TCR alpha/delta locus could not be determined, as the scaffolds did not contain the respective C domain genes.

#### XI.2.3. Structure of the major histocompatibility complex (MHC)

**Key features** | The presence of four MHC paralogous groups in the *C. milii* genome is compatible with two rounds of genome duplications in the ancestor of cartilaginous fishes. Polymorphic MHC class I and class II genes were identified, with the latter type of genes present in fewer numbers.

We first analysed the presence of MHC paralogous groups in the *C. milii* genome. The conceptually translated sequences of all known genes that map to the human MHC and three other MHC-paralogous regions were used as queries against the *C. milii* databases. For approximately half of human MHC-encoded genes (291 of 634 human sequences used as

queries) orthologues were identified in the *C. milii* genome and confirmed by phylogenetic analyses (data not shown).

In the human genome, genes of the MHC paralogous group are distributed mainly on the specific regions of four sets of chromosomes (chromosomes 1, 6, 9 and 19), with some genes located on chromosomes 12, 15, and others<sup>199</sup>. Several *C. milii* scaffolds contained genes whose human orthologues map to one of the MHC paralogous regions (**Supplementary Fig. XI.2**). Most synteny seems to be conserved (except in inversions). As expected, some genes map to different paralogous regions in *C. milii* compared to other vertebrates, perhaps due to the differential silencing after genome duplication. Unfortunately, we could not assemble the MHC in detail since these scaffolds were generally short.

Analyses of genome assembly and transcriptomes of *C. milii* revealed evidence for both alleles of a single MHC class Ia gene, and multiple (2~3) MHC class I-related genes, one of which is unlinked to the MHC (data not shown). The presence of a single class Ia is consistent with previous work with other shark species<sup>200,201</sup>. In contrast, only one canonical MHC class II alpha gene and one MHC class II beta gene were detected; consistent with studies in all fish species, no DM (or DO) loci were detected.

#### XI.2.4. Antigen presentation

**Key features** | Many elements of the antigen presentation pathways (**Supplementary Table XI.1**) through MHC class I and II molecules known from mammals are present in *C. milii*, compatible with the presence of polymorphic MHC class I and II genes.

All three immunoproteasome components for presentation of antigens via MHC class I molecules were found, including PSMB8 and PSMB10, located next to each other on scaffold\_1084<sup>202</sup>. The IFN $\gamma$ -inducible PSMB9 proteasome subunit could not be identified in *C. milii* databases, but is present in the transcriptomes of *G. cirratum*; the PSMB11 subunit which is specifically expressed in mammalian cortical thymic epithelial cells appears to be a pseudogene in *C. milii*. Many genes relevant for the MHC Class II pathway were found, with the exception of Cathepsin S; by contrast, the number of Cathepsin L-like genes is greatly increased (13 genes), eight of which are located in tandem on scaffold\_85.

#### XI.2.5. NK receptors

**Key features** | Despite their rapid evolution, some conserved representatives of NK receptor genes could be identified in *C. milii*.

Because NK receptors generally evolve rapidly, it is essentially impossible to establish orthology of these genes. The *C. milii* genome lacks genes containing C2-type immunoglobulin superfamily domains (IgSF) (similar to KIRs) or lectin-type (similar to Ly49). There was no activating receptor similar to NKG2D, NKp44, or NKp56; however, an NKp30/NCR3-like receptor (*H. sapiens*, ENSP00000365240) was identified (scaffold\_5779; SINCAMP00000007648)<sup>203</sup>; NKp30 contains a V-type IgSF with germline-joined configuration, representing a primordial VJ-type of IgSF domains.

#### XI.2.6. Pattern recognition receptors

**Key features** | The TLR system of *C. milii* consists of 10 genes and is distinguished by the lack of identifiable TLR4 receptor components; important representatives of intracellular helicases and NOD-like proteins are present. A large number of NLRP3-like genes and several other upstream components of the inflammasome were identified; the AIM2 component appears to be missing.

##### *XI.2.6.1. TLRs and signaling components*

Nucleic acid sensing TLRs (TLR3, 7, 8, 9) are clearly recognizable in the *C. milii* genome (**Supplementary Table XI.2**). For the other TLRs, assignment of two TLR1/6/10 homologues is easily possible. For the related TLR2/5 genes, two homologues are found. Two genes are unassigned relative to human TLRs and probably are “fish-specific” TLRs. A clear TLR4 orthologue is missing; however, a pseudogene fragment related to TLR4 is located in a syntenic region on scaffold\_45 between DBC1 and ASTN2 at ~ 3,886,000 bp. This suggests that a precursor of a complete TLR4 gene was lost from the *C. milii* genome. No expansion of TLR gene number relative to mammals was noted. The extracellular components (LBP, CD14, MD-2) of the TLR4-specific pathway could not be found, although several homologues of the LBP-related BPI encoding genes are present in the *C. milii* genome. The lack of all of these components is consistent with the failure to induce LPS responsiveness in elasmobranchs (Helen Dooley and Martin Flajnik, unpublished). Interestingly, a clear TRAM homolog could be found, indicating the loss of this component

in teleosts (TRAM is not found in zebrafish and cod) is derived. This conclusion is supported by the analysis of the lamprey genome ([http://www.ensembl.org/Petromyzon\\_marinus/Info/Index](http://www.ensembl.org/Petromyzon_marinus/Info/Index); version 7), in which two TRIF/TRAM encoding gene could be detected (presumptive lamprey TRIF, GL478822 [nt. 16796-17242]; presumptive lamprey TRAM, GL478822 [nt. 30868-31548]). Other key intracellular signaling components (MYD88 etc.) are present in *C. milii* (**Supplementary Table XI.2**).

#### *XI.2.6.2. Other pathogen receptors*

Important cytoplasmic sensing receptors, such as DHX58, IFIH1, DDX58 helicases are present, as are homologues of NOD1 and NOD2 (**Supplementary Table XI.3**).

#### *XI.2.6.3. Inflammasome components*

With respect to inflammasome components, downstream effectors, such as IL1B and IL18 are present in the *C. milii* genome (**Supplementary Table XI.3**). Several of the known upstream components, such as NLRP proteins appear to be present; however, owing to the fact that they are all large multidomain proteins sharing considerable sequence similarity, further work is required to determine the sizes of these gene families. Nonetheless, it is notable that we have identified at least 57 NLRP3-like genes in the genome of *C. milii*. For many of these sequences, full-length transcripts were obtained and related sequences are present in the transcriptomes of *G. cirratum* as well; interestingly, the conceptually translated full-length transcripts all lack the characteristic pyrin domain that mediates homotypic protein interactions between NLRP3 and ASC. No evidence for an AIM2 gene could be detected in the respective syntenic regions of the *C. milii* genome.

#### XI.2.7. Complement system

**Key features** | The complement system of *C. milii* is reminiscent of other cartilaginous fishes and appears to be essentially complete when compared to the situation in mammals (**Supplementary Table XI.4**).

As expected, genes belonging to the three complement pathways<sup>204</sup> are present in the genome of *C. milii*. There are additional loci for C1r (Genbank accession numbers JW865071 and JW873796) and C1s (SINCAMG00000010562 and Genbank accession number JW866600), which may be unique to this species. Similar to the situation in nurse shark<sup>205</sup>,



there are two factor B genes (Genbank accession numbers JW864721 and JW865377). Most complement regulatory genes were also found, suggesting that the complement system is similar to that of mammalian system.

### XI.3. Communication, Coordination, Response

**Key features** | The evolutionary trajectory of the CXC class of chemokines and receptors is less dynamic than that of the CC class of chemokines/receptors, which are more numerous in *H. sapiens*. All of the basic components of the interferon type-I and type-II receptor/ligand system are present in the genome of the common ancestor of the cartilaginous and bony fish, but have undergone lineage-specific modifications and expansions. Despite the evolutionary distance between *H. sapiens* and *C. milii*, many components of the well-described human cytokine system could be identified in the *C. milii* genome; a perplexing aspect of the *C. milii* genome is the near complete complement of IL2RG-family receptor components, but paucity of corresponding ligands, particularly those associated with T helper cell responses in mammals.

#### XI.3.1. Chemokines and their receptors

Phylogenetic analyses for both chemokines and chemokine receptors suffer from low bootstrapping values. In some cases, syntenic relationships help to resolve ambiguities in the assignment of orthology. Overall, the number of CC chemokines is 28 for *H. sapiens*, and 14 for *C. milii*; for two homeostatic chemokines (CCL19 and CCL25) and one dual-function chemokine (CCL20), orthology could be established (**Supplementary Table XI.5**). The genomes of *H. sapiens* and *C. milii* both encode 17 CXC chemokines; orthology could be established for CXCL8, CXCL12 (two copies are found in the *C. milii* genome) and CXCL14 (**Supplementary Table XI.5**). Neither XC-like nor CX<sub>3</sub>C chemokines were found.

Ten CCR-type receptors are encoded in the genome of *H. sapiens*, but only 4 in *C. milii*, those orthologous to CCR4, CCR6, CCR7, and CCR9 (**Supplementary Table XI.6**). The lower number of CCR receptors in the *C. milii* genome corresponds to the presence of fewer CC chemokines. For most of the 7 CXCR-type genes in *H. sapiens*, orthologues can be defined in *C. milii*; the same is true for the other six chemokine receptors that are encoded in the genomes of *H. sapiens* and *C. milii*. Our analysis is consistent with recent work on the phylogeny of chemokines/receptors<sup>206</sup>.

## XI.3.2. Interferons and their receptors

### *XI.3.2.1. Interferon receptor components*

At the human interferon receptor locus on chromosome 21, four genes encoding components of the type-I (IFNAR1 and IFNAR2) and type-II (IFNGR2) and type-III (IL10RB) interferon receptors are present, all facing in the same orientation (**Supplementary Fig. XI.3a**). At the corresponding *C. milii* locus (scaffold\_152), we identified four interferon-receptor-like genes in the same orientation, together with a fifth gene in the opposite orientation; a similar locus containing five interferon receptor-like genes is also present in the genome of *T. rubripes* (**Supplementary Fig. XI.3a**). The human IFNGR1 gene is located on human chromosome 6q23, closely linked to the human IL22RA2 and IL20RA genes. This association is an ancestral feature, as it is also conserved in the *C. milii* genome on scaffold\_26 (**Supplementary Fig. XI.3a**); however, additional receptor genes are present at the *C. milii* locus; namely two IFNGR1-like genes (SINCAMP00000024611 and SINCAMP00000024606), and two IL22RA2-like genes (see **Supplementary Tables XI.7a,b**). The human IL28RA gene is located on chromosome 1p36.11, closely linked to the IL22RA1 gene; a homologous gene cluster was identified in the *C. milii* genome (IL28RA, SINCAMP00000014734; for IL22RA1, see **Supplementary Tables XI.7a,b**) on scaffold\_36 (**Supplementary Fig. XI.3a**). This receptor gene cluster includes the linked, but functionally unrelated gene, MYOM3. Overall, the striking syntenic conservation of the *C. milii* and human interferon receptor loci indicates that the genomic configuration of these receptors was set prior to the divergence of the cartilaginous and bony fish. This syntenic conservation may be more variable in teleosts, at least in the case of *D. rerio*, where genes for type-I (*crfb1* and *crfb5*) and type-II (*crfb2*, *crfb13* and *crfb17*) interferon receptor chains map to discrete loci with no evidence of receptor gene clustering.

### *XI.3.2.2. Interferons*

#### *XI.3.2.2.1. Type-I interferons*

In humans, sixteen type-I IFN genes are found in a distinct cluster on human chromosome 9p22, which contains 16 protein coding IFN genes (13 IFNA genes, plus one IFNB, one IFNE and one IFNW gene) and 12 IFN pseudogenes; a simplified representation of this locus (excluding pseudogenes) is depicted in **Supplementary Fig. XI.3b**. Although we could identify a *C. milii* scaffold containing orthologues of the genes that flank the human type-I

IFN locus, we could not identify any linked IFN-like genes within the same scaffold, indicating that the *C. milii* genome lacks a type-I IFN locus that is homologous to the human 9q22 locus. Using the human IFNA2, IFNB1, IFNW1, IFNE and IFNK proteins as query sequences, three type-I IFN genes were identified in the *C. milii* genome assembly. Two of these genes are found closely linked on scaffold\_185 (**Supplementary Fig. XI.3b**); based on the presence or absence of conserved cysteine residues<sup>207</sup>, they can be classified as members of subgroups I and II, respectively. The location of these genes, next to the *C. milii* GH1 orthologue, is homologous to the *D. rerio* locus that encodes three type-I IFN genes, IFNphi1-IFNphi3 located on zebrafish chromosome 3. Interestingly, the genes flanking the *C. milii* (and to a lesser degree *D. rerio*) type-I IFN locus display some syntenic conservation with human chromosome 17q23.3, which contains the GH1 gene. The third *C. milii* type-I IFN gene mapped to a single gene scaffold (scaffold\_3336; SINCAMP00000015870), precluding further investigation based on syntenic assignments. The structural similarities of growth hormone and interferons and the close proximity of their genes raise intriguing questions about their possible evolutionary relationship.

#### XI.3.2.2.2. Type-II interferons

The locus encoding IFN- $\gamma$  appears to be well conserved amongst cartilaginous fish, teleosts and mammals. In humans, a single IFNG gene is located on chromosome 12q14.3-q15, next to the genes for IL26 and IL22. A homologous locus, which encodes IFNG and IL22 genes, is present in the *C. milii* genome, on scaffold\_133 (**Supplementary Fig. XI.3b**). Several syntenic genes are conserved in this region, although no orthologue for IL26 was found in the *C. milii* scaffold. By contrast, the configuration on *D. rerio* chromosome 4 is similar to the human genome, although in this case two IFNG genes are present (**Supplementary Fig. XI.3b**).

#### XI.3.2.2.3. Type-III interferons

To date, type III interferons have only been identified in mammals and birds. Although we were able to find putative orthologues of both chains of the type-III IFN receptor (IL28RA and IL10RB), we were unable to identify any orthologues for type-III interferons in the *C. milii* genome.

#### XI.3.3. Interleukins and cytokines and their receptors (**Supplementary Tables XI.7a,b,c**)

### XI.3.3.1. Common- $\gamma$ -chain cytokines

In humans, six interleukins (IL2, IL4, IL7, IL9, IL15 and IL21) are known to signal via receptors that pair with the common- $\gamma$  chain (Cgamma), encoded by the *IL2RG* gene. *IL2RG* is located on the X chromosome of all mammals investigated to date; two *IL2RG* genes are found clustered on scaffold\_2 of the *C. milii* genome, which, based on synteny appears to be the *C. milii* homologue of the human X chromosome. The presence of two linked *IL2RG* genes in the *C. milii* genome is analogous to the case reported in several teleosts (zebrafish, trout, pufferfish), and suggests that a duplication of the *IL2RG* gene had taken place prior to the divergence of cartilaginous and bony fish, and that one copy was later lost at some point prior to the divergence of the mammalian lineage.

We were able to identify potential orthologues for all of the receptors known to pair with Cgamma, except for *IL2RA*. In humans, the genes encoding the *IL2RA* and *IL15RA* chains are located together on chromosome 10p15.1 (**Supplementary Fig. XI.4a**). BLASTp searches of the *C. milii* predicted protein database identified a candidate *IL15RA* gene on scaffold\_17. Investigation of the surrounding genes revealed what appears to be a break in synteny centered upon the *IL15RA* gene in *C. milii*: four genes that map immediately upstream of the human *IL15RA* gene are conserved in *C. milii* on scaffold\_17, while three genes immediately downstream map to scaffold\_191 (**Supplementary Fig. XI.4a**). No *IL2RA*-like gene could be identified on either scaffold, and BLAST searches failed to reveal any alternative candidates in the *C. milii* genome. An *IL15* orthologue is situated on scaffold\_57 in the *C. milii* genome; however, orthologues for *IL2* and *IL21* are not present at the predicted syntenic position on scaffold\_208 (**Supplementary Fig. XI.4b**). In line with the results from *C. milii*, interrogation of the nurse shark thymus and spleen transcriptomes identified orthologues of *IL2RB*, *IL2RG*, *IL15RA* and *IL15*, but neither *IL2RA* nor *IL2*. Given that some teleost fish (such as trout and fugu) appear to have *IL2RA* and *IL2* genes<sup>208</sup>, while others (e.g., zebrafish) lack both the receptor and ligand, it is possible that the *IL2/IL2RA* ligand-receptor combination may have evolved early in the teleost lineage, subsequent to the divergence of bony and cartilaginous fish. Our search for additional Cgamma cytokines led to the identification of the *IL7* gene on scaffold\_48. The *C. milii* *IL7* gene eluded initial BLAST-based searches, but was finally identified by searching for an orthologue of *ZC2HC1A*, a gene linked to the human *IL7* locus, and subsequently interrogating the

surrounding genes. A *C. milii* *IL7R* orthologue was identified in the transcriptome database; however, this gene is not present in the current genome assembly.

BLAST- and synteny-based searches failed to identify any other IL2RG-ligands, although in several cases syntenic regions lacking the expected cytokine genes were found. An example is shown for the case of the *IL4* gene, which appears to be absent from the *C. milii* genome (**Supplementary Fig. XI.4c**). In humans, *IL4*, *IL13* and *IL5* genes are found clustered together at chromosome 5q31.1. BLAST searches failed to identify candidate orthologues for any of these cytokine genes in the *C. milii* genome, however *RAD50* and *KIF3A*, which flank the human *IL13* and *IL4* genes, were identified on scaffold\_92 in the same tail-to-tail arrangement, but with no intervening gene. This is in contrast to the case in teleosts, where *IL4* (linked to *KIF3A*) and *IL13* (linked to *RAD50*) candidates have been identified (**Supplementary Fig. XI.4c**). Our failure to identify *IL4* and *IL13* genes is surprising, because candidate orthologues for their unique receptors (*IL4R*, *IL13RA1* and *IL13RA2*) are clearly present in the *C. milii* genome. The human *IL4R* gene is located at chromosome 16p12.1, together with the *IL21R* gene (**Supplementary Fig. XI.4d**). BLAST searches identified candidate *IL4R* and *IL21R* genes in the *C. milii* genome, clustered together on scaffold\_147. We noticed that two genes (*JMJD5* and *NSMCE1*) on one side of the *IL4R/IL21R* locus were conserved between humans, *D. rerio* and *C. milii*; however, on the other flank no syntenic genes could be identified (**Supplementary Fig. XI.4d**). Additionally, the number and composition of the receptor genes found at this locus differs between species: two in humans (*IL4R* and *IL21R*), two in zebrafish (*IL4R* and an unclassified receptor) and three in the case of *C. milii*. Of the three genes present at the *C. milii* locus, two could be identified as *IL4R*- and *IL21R*-like; however, the third receptor was difficult to assign, and may be the *C. milii* equivalent of *IL9R* based on sequence similarity.

*IL13* shares some functional similarities with *IL4*. The genes encoding *IL13*-receptor components, *IL13RA1* and *IL13RA2* are present in the *C. milii* genome (**Supplementary Fig. XI.4e**); this contrasts with the apparent absence of an *IL13*-like gene.

### XI.3.3.2. *IL6ST*-family cytokines

*IL6ST* (gp130) is the common signalling chain component of the receptor complex for several important cytokines, including *IL6*, *IL11*, *IL27*, *IL31*, *LIF*, *OSM* and *CNT*. In humans, the *IL6ST* gene is found together with the related *IL31RA* gene on chromosome 5q11.2. An analogous locus was identified in the *C. milii* genome on scaffold\_22; this locus

showed evidence of syntenic conservation, but contains three *IL6ST*-like genes (**Supplementary Fig. XI.4f**). Our analysis suggests that all three of the genes present at the *C. milii* locus are more closely related to *IL6ST* than to *IL31RA*, a result consistent with the fact that neither *IL31* nor *OSMR* (encoding the second component of the IL31-receptor complex) genes could be detected in the *C. milii* genome. We identified several genes encoding receptor chains that associate with IL6ST, including *IL11RA*, *IL27RA*, *LIFR* and *CNTFR*. Interestingly, although two potential orthologues of *IL6* clustered together on scaffold\_4 of the *C. milii* genome, an obvious *IL6R* orthologue could not be identified. In addition to *IL6*, we also identified a *LIF* orthologue in *C. milii*, but failed to identify an *IL11* gene, despite the presence of an *IL11RA* gene. Two heterodimeric ligands, IL27 and CNT, signal via a receptor complex that includes IL6ST. In both cases we could identify the genes encoding their cognate receptor chains (*IL27RA* and *CNTFR*), but genes for only one component of each heterodimeric ligand; *EBI3* in the case of IL27 and *CRLF1* for CNT.

#### XI.3.3.3. Colony-stimulating factors

The colony stimulating factors CSF1, CSF2 and CSF3 play important roles in myelo- and granulopoiesis. We were able to identify genes for CSF1R, and the CSF1R-ligand IL34 in the *C. milii* genome, but failed to identify a *CSF1* gene - an interesting result given the importance of CSF1 in bone homeostasis in mammals (see **Supplementary Note X**). An orthologue of the human *CSF2RB* gene was identified on the *C. milii* scaffold\_299. *CSF2RB* encodes the common chain of the CSF2, IL3 and IL5 receptor complexes in humans, and BLAST searches revealed a cytokine receptor gene cluster on scaffold\_18 that may contain the *C. milii* orthologues of *CSF2RA*, *IL3RA* and *IL5RA* genes. Five cytokine-receptor genes are present at the scaffold\_18 locus, and the surrounding genes displayed syntenic conservation with the human *CRLF2/CSF2RA/IL3RA* receptor gene cluster on the X-chromosome at p22.33 (**Supplementary Fig. XI.4g**). Although it is difficult to confidently assign all five *C. milii* genes to human orthologues, it is conceivable that this locus encodes the *C. milii* equivalents of the *IL3R*, *IL5R* and *CSF2RA* genes.

Although we were able to identify putative receptor chains for CSF2, IL3 and IL5, we failed to detect genes for any of the ligands themselves. We did however identify a *CSF3* orthologue on scaffold\_251; and a *CSF3R* candidate on scaffold\_64, supported by sequence similarity, but not syntenic conservation.

#### XI.3.3.4. *IL12/IL23 family*

Genes for both chains of the IL12-receptor (*IL12RB1* and *IL12RB2*) were identified in the *C. milii* genome, but two genes corresponding to one of the components of the heterodimeric IL12 ligand (p40), *IL12B*, could be identified. This suggests the intriguing possibility that IL12 is composed of a heterodimer of two p40 homologues instead of the mammalian p35/p40 heterodimer. No orthologue encoding IL23R (which pairs with *IL12RB1* to form the IL23-receptor complex) or *IL23A* was detectable. Since IL23 is a potent inducer of Th17 cells in mammals, this finding has important implications for the diversity of T cell lineages in *C. milii* (see section XI.5).

#### XI.3.3.5. *IL 10 family*

In humans, the *IL10* gene is located on chromosome 1 at q32.1-q32.2, within a cluster that contains the genes of four related cytokines – IL10, IL19, IL20 and IL24. A homologous cluster is present in the *C. milii* genome on scaffold\_70 (**Supplementary Fig. XI.4h**). The *C. milii* *IL10* cluster contains three genes – one of these genes appears to be an *IL10* orthologue, and while the remaining two genes clearly belong to the IL10 gene family, they cannot be confidently assigned as direct orthologues of particular mammalian IL10-family members. In addition to the *IL10*-family members found clustered on scaffold\_70, we identified an *IL22* orthologue on scaffold\_133, as part of the *C. milii* *IFNG* cytokine cluster. No *IL26* candidate was identified; the absence of *IL28A*, *IL28B* and *IL29* is discussed in section XI.3.2.

Orthologues of genes encoding all of the components of the IL10, IL19, IL20 and IL24 receptors (*IL10RA*, *IL10RB*, *IL20RA*, *IL20RB*, *IL22RA1* and *IL28RA*) were found in the *C. milii* genome, although assignment of the putative *IL20RB* orthologue is based on sequence data alone, and was not supported by syntenic conservation.

#### XI.3.3.6. *IL17 family*

There is good correspondence between receptors and ligands. One interesting aspect is that the Th2 cytokine IL17E (also known as IL25) is absent (as is its receptor); this is in line with the absence of other Th2-type interleukins (see **Supplementary Tables XI.7a,b,c**).

#### XI.3.4. TNF and TNF receptors (**Supplementary Table XI.8**)

**Key features** | Many members of the TNFR gene family and its ligands, which are key regulators of the adaptive immune system, are present in the genome of *C. milii*; notable

exceptions are the genes encoding LTR $\beta$  and its ligands LT $\alpha$  and LT $\beta$ , known to regulate secondary lymphoid tissue formation in mammals.

It is notable that orthologues of the key co-stimulatory molecules TNFRSF4 (OX40), TNFRSF5 (CD40) and TNFRSF8 (OX30) were confidently identified. The same is true for TNFRSF11A (RANK), and TNFSF11 (RANKL), suggesting that their role in formation of the thymic medulla is evolutionarily ancient. Because of the additional role of RANK/RANKL in bone formation and the presence of TNFRSF11B (OPG), it appears that these receptor/ligand pairs predated the evolution of calcified bones (see **Supplementary Note X**). Orthologues of the key molecules involved in B cell homeostasis, TNFRSF13B (TACI) and TNFRSF17 (BCMA) were identified.

Some notable differences to the mammalian gene complements are:

(a) The human TNFRSF members TNFRSF1A, TNFRSF3 and TNFRSF7 all map close to the CD4 locus; none were clearly identified in the *C. milii* genome, suggesting that this entire genomic region is of more recent evolutionary origin. (b) No orthologue of the TNFRSF7 ligand TNFSF7 was identified in the *C. milii* genome. (c) While orthologues of TNFRSF9 (FAS) and TNFSF6 (FASL) were identified, no clear orthologues of TNFRSF10A-D were identified, although TNFSF10 (TRAIL) is present. (d) The ligands for TNFRSF1A and TNFRSF3 are located in the MHC region of *H. sapiens*; whether they are in the MHC region of *C. milii* is unclear.

#### **XI.4. Effector cells and lymphoid organs**

**Key features** | The most conspicuous differences between the immunogenome of *C. milii* and mammals were identified in genes relevant for differentiation of T cell lineages; the implications of these findings are discussed in section XI.5 and the main text.

##### XI.4.1. Lymphocyte-related genes

The *C. milii* genome encodes all lineage regulators known in mammals to effect the development and differentiation of B and T lymphocyte subsets, with several notable exceptions (**Supplementary Table XI.9**). First, a RORC orthologue could not be identified in any of the genomic and transcriptomic databases of *C. milii* and other cartilaginous fishes, suggesting that LTI-like cells, important for secondary lymphoid organ development<sup>209</sup> are



not present in cartilaginous fishes (see XI.4.2). Second, although a FOXP3-like gene could be identified, it lacks the critical amino acid residues in the DNA binding domain required for its immunosuppressive functions<sup>210</sup>; **Supplementary Fig. XI.5**). Whereas a ZBTB7B/ThPOK gene, encoding a critical regulator of the CD4<sup>+</sup> T cell lineage<sup>211</sup> could not be identified in the genome assembly, transcripts encoding related sequences were found in the transcriptomes of several cartilaginous fish, such as *C. milii*, *S. canicula*, *R. erinacea* and *Ginglymostoma cirratum* (**Supplementary Fig. XI.6**).

Our analysis revealed the presence of characteristic representatives of signalling components (including LCK), co-stimulatory molecules and their receptors and genes whose mutation is known to lead to primary immunodeficiencies (**Supplementary Table XI.9**). Likewise, key elements of the apoptosis pathways are present in the *C. milii* genome (**Supplementary Table XI.10**).

#### *XI.4.1.1 CD8 coreceptors*

The search for T lineage-associated co-receptor genes resulted in the identification of bona fide CD8A and CD8B genes (**Supplementary Fig. XI.7**; **Supplementary Table XI.11**); the characteristic interaction motifs are conserved in the conceptually translated protein sequences of LCK and CD8A genes (**Supplementary Fig. XI.8a**). Note that teleost CD8A sequences possess a functionally equivalent CxH motif, instead of the canonical CxC motif found in tetrapod CD8A sequences<sup>212</sup>.

#### *XI.4.1.2 CD4 coreceptors*

Our search for a CD4 gene in the genome of *C. milii* and the transcriptomes of *C. milii* and *G. cirratum* proved unsuccessful (see **Supplementary Figs. XI.8, XI.9, XI.10** and **Supplementary Table XI.12** for phylogenetic analyses of vertebrate CD4 proteins and those encoded by potential candidate genes from cartilaginous fishes, and **Supplementary Table XI.13** for a summary of their structural hallmarks). While it was possible to identify a gene encoding a protein whose extracellular domain structure resembles that of CD4 and LAG3 (**Supplementary Fig. XI.8c**), the predicted protein lacks the critical CxC motif (**Supplementary Fig. XI.8b**) in an otherwise unusually long intracytoplasmic domain; this LAG3-related protein is also found expressed in the nurse shark transcriptome libraries of thymus and spleen. We also determined the expression levels of this gene (designated CD4-

R/LAG3 in **Supplementary Fig. XI.8d**) from transcriptome sequence data using RSEM v1.2.3<sup>213</sup> and found that it is expressed 2-3 orders of magnitude less than the corresponding co-receptor *CD8A* gene; furthermore, it appears to be expressed at higher levels in peripheral lymphoid tissues (RT-PCR data not shown). Collectively, these findings do not support the presence of a bona fide *CD4*-like gene in cartilaginous fishes.

#### *XI.4.1.3 T Lymphocyte lineages*

The fact that all relevant CD8-lineage determinants are present in the *C. milii* genome indicates that cytolytic T cell lineages, such as NK and CD8<sup>+</sup> T cells are present in cartilaginous fishes. The present analysis does not support the presence of a canonical CD4<sup>+</sup> T helper cell lineage, although the presence of an unconventional CD8- T helper cell lineage cannot be excluded (see main text for further discussion).

In analogy to the smaller range of potential helper T lineages, the genome analysis also suggests that the types of innate lymphoid cells<sup>214</sup> in cartilaginous fishes might also be much smaller, possibly only comprising so-called group 1 ILCs, characterized by their ability to produce IFN $\gamma$ . Note that group 2 ILCs are defined as producers of classical Th cytokines such as IL4, IL5, and IL13, all of which are missing in cartilaginous fishes; likewise, because group 3 ILCs depend on *RORC* for their development, they are also likely absent.

#### XI.4.2. Genes related to the formation and function of lymphoid organs

Cartilaginous fishes possess a thymus, the primary lymphoid organ critical for T cell development<sup>215</sup>. Indeed, the gene encoding the FOXP1 transcription factor, known to be essential for the differentiation of thymic epithelial cells<sup>216</sup> and the gene encoding the autoimmune regulator AIRE<sup>217</sup> are present (**Supplementary Table XI.9**). Likewise, the *HOX11* gene, a key component of the genetic pathway required for spleen development<sup>218</sup> could be unambiguously identified (**Supplementary Table XI.9**).

However, cartilaginous fishes, like all ectothermic vertebrates, lack lymph nodes and recognizable germinal centres. Indeed, a number of genes known to be critical for their development in mammals are missing in the genome of *C. milii*. First, a RORC orthologue, which in mammals is important for the development of lymphoid tissue inducer cells (LTi)<sup>214</sup> could not be identified in any of the genomic and transcriptomic databases of cartilaginous

fishes (**Supplementary Table XI.9**). This is in line with the lack of critical regulators of early steps of lymph node development, such as  $LT\beta R$  and its ligands  $LT\alpha$  and  $LT\beta$  (**Supplementary Table XI.8**), and a crucial chemokine, CXCL13 (**Supplementary Table XI.5**). Moreover, IL21, a cytokine critically involved in the development of the  $T_{FH}$  subset of T cells<sup>219</sup> is also absent (**Supplementary Tables XI.7a,b,c**).

### **XI.5 Summary of major findings**

The presence of elaborate innate immune functions in *C. milii* is supported by an essentially modern form of the complement system, a diverse repertoire of pathogen receptors, such as TLR- and NOD-like receptors and intracytoplasmic helicases, upstream and downstream effectors of the inflammasomes, and the basic components of the interferon system; a notable exception is the apparent lack of a TLR4-related receptor and associated components of this signalling pathway among the ten identifiable TLR-like genes, which is consistent with LPS non-responsiveness in sharks (M. Flajnik et al., unpublished observations). The immunoglobulin (Ig) genes are in the cluster-type organization found in all chondrichthyans, and the entire Ig system is most similar to another holocephalan, the ratfish<sup>190</sup>. *TCR* genes are found in the typical translocon organization of gnathostomes, including close linkage of the TCR alpha and delta loci<sup>220</sup>. Ig heavy (H) genes are linked to TCR loci, likely an ancestral feature of antigen receptors. The presence of four MHC paralogous groups in the *C. milii* genome (**Supplementary Fig. XI.2**) is compatible with two rounds of genome duplication in the ancestor of gnathostomes. The analysis of TNF and TNFR gene families suggests, among others, the presence of TNFSF2 ( $TNF\alpha$ ), an important regulator of inflammatory responses<sup>221</sup> and that of the TNFRSF11A (RANK) and TNFSF11 (RANKL) receptor/ligand pair, essential morphogenetic regulators<sup>221</sup>. Consistent with the lack of lymph nodes and germinal centres as well as the relatively long lag-time required to generate humoral immunity<sup>222</sup>, the genes encoding the mammalian regulators of secondary lymphoid tissue formation, TNFRSF3 ( $LT\beta R$ ) and its ligands (TNFSF1 [ $LT\alpha$ ] and TNFSF3 [ $LT\beta$ ])<sup>221</sup> are absent from the *C. milii* genome, as is a critical cytokine of follicular helper T cells, IL21<sup>219</sup>. By contrast, key determinants of formation and function of spleen (such as HOX11)<sup>218</sup> and thymus (FOXP1)<sup>216</sup>, regulating differentiation of thymic epithelial cells, and AIRE<sup>217</sup>, a key regulator of central tolerance) are present.

All hallmarks of the cytotoxic CD8 lineage of T cells are present in the *C. milii* genome (**Fig. 6a**). Surprisingly, however, despite the presence of polymorphic MHC class II and invariant chain genes a bona fide *CD4* gene is absent, as are genes encoding transcription factors regulating the differentiation of several T helper lineages and several of their key effector cytokines (**Fig. 6b**). The gene encoding FOXP3, the essential regulator of the CD4<sup>+</sup> regulatory T (T<sub>reg</sub>) cells, while present, lacks the structural hallmarks of its mammalian orthologues (**Supplementary Fig. XI.5**)<sup>210</sup>; in support of the lack of bona fide T<sub>reg</sub> cells, we note the absence of the gene encoding IL2, a key regulator of T<sub>reg</sub> cells in mammals<sup>223</sup>, and its specific receptor, IL2RA. We also noted the conspicuous absence of genes encoding cytokines of the T helper lineage (IL4, IL9, IL13, IL17E/IL25, IL31) from an otherwise seemingly modern complement of interleukin genes, whereas the gene encoding IFN $\gamma$ , a classical Th1 cytokine, is present in *C. milii* and nurse shark. Several members of the IL10 family of anti-inflammatory cytokines are encoded in the *C. milii* genome, suggesting that the balance between pro- and anti-inflammatory functions can be achieved without a dedicated regulatory T cell subset. *RORC*, the gene encoding ROR $\gamma$ t, and genes encoding IL23 and IL23RA, which potentiate Th17 responses, are not present in cartilaginous fishes, suggesting that T<sub>H</sub>17 cells<sup>224</sup> are not present; thus, in cartilaginous fish IL17 and IL22 might be furnished by non-lymphoid cells. The lack of the ROR $\gamma$ t transcription factor also impacts the composition of the different types of innate lymphoid cells (ILCs)<sup>214</sup>. Cartilaginous fishes might only possess group 1 ILCs, characterized by their expression of IFN $\gamma$ , but possibly neither group 2 ILCs, because the relevant effector cytokines (e.g. IL-4) are missing, nor group 3 ILCs (including lymphoid tissue inducer cells), because of their dependence on ROR $\gamma$ t.

## References

- 38 Miller, J. R., Koren, S. & Sutton, G. Assembly algorithms for next-generation sequencing data. *Genomics* **95**, 315-327, doi:10.1016/j.ygeno.2010.03.001 (2010).
- 39 Consortium, I. C. G. S. Sequence and comparative analysis of the chicken genome provide unique perspectives on vertebrate evolution. *Nature* **432**, 695-716, doi:10.1038/nature03154 (2004).
- 40 Dalloul, R. A. *et al.* Multi-platform next-generation sequencing of the domestic turkey (*Meleagris gallopavo*): genome assembly and analysis. *PLoS Biol* **8**, doi:10.1371/journal.pbio.1000475 (2010).
- 41 Grabherr, M. G. *et al.* Full-length transcriptome assembly from RNA-Seq data without a reference genome. *Nat Biotechnol* **29**, 644-652, doi:10.1038/nbt.1883 (2011).
- 42 Trapnell, C., Pachter, L. & Salzberg, S. L. TopHat: discovering splice junctions with RNA-Seq. *Bioinformatics* **25**, 1105-1111, doi:10.1093/bioinformatics/btp120 (2009).
- 43 Trapnell, C. *et al.* Transcript assembly and quantification by RNA-Seq reveals unannotated transcripts and isoform switching during cell differentiation. *Nat Biotechnol* **28**, 511-515, doi:10.1038/nbt.1621 (2010).
- 44 Venkatesh, B. *et al.* Survey sequencing and comparative analysis of the elephant shark (*Callorhinchus milii*) genome. *PLoS Biol*. **5**, e101, doi:10.1371/journal.pbio.0050101 (2007).
- 45 Kasahara, M. *et al.* The medaka draft genome and insights into vertebrate genome evolution. *Nature* **447**, 714-719, doi:10.1038/nature05846 (2007).
- 46 Star, B. *et al.* The genome sequence of Atlantic cod reveals a unique immune system. *Nature* **477**, 207-210, doi:10.1038/nature10342 (2011).
- 47 Zhang, Z., Schwartz, S., Wagner, L. & Miller, W. A greedy algorithm for aligning DNA sequences. *J Comput Biol* **7**, 203-214, doi:10.1089/10665270050081478 (2000).
- 48 Bailey, J. A. *et al.* Recent segmental duplications in the human genome. *Science* **297**, 1003-1007, doi:10.1126/science.1072047 (2002).
- 49 Olshen, A. B., Venkatraman, E. S., Lucito, R. & Wigler, M. Circular binary segmentation for the analysis of array-based DNA copy number data. *Biostatistics* **5**, 557-572, doi:10.1093/biostatistics/kxh008 (2004).
- 50 Locke, D. P. *et al.* Comparative and demographic analysis of orang-utan genomes. *Nature* **469**, 529-533, doi:10.1038/nature09687 (2011).
- 51 Scally, A. *et al.* Insights into hominid evolution from the gorilla genome sequence. *Nature* **483**, 169-175, doi:10.1038/nature10842 (2012).
- 52 Maddock, M. B. & Schwartz, F. J. Elasmobranch cytogenetics: methods and sex chromosomes. *Bull. Mar. Sci.* **58**, 147-155 (1996).
- 53 Fujita, M. K., Edwards, S. V. & Ponting, C. P. The Anolis lizard genome: an amniote genome without isochores. *Genome Biol Evol* **3**, 974-984, doi:10.1093/gbe/evr072 (2011).
- 54 Fearnhead, P. & Vasileiou, D. Bayesian analysis of isochores. *Journal of the American Statistical Association* **104**, 132-141, doi:10.1198/jasa.2009.0009 (2009).
- 55 Costantini, M., Cammarano, R. & Bernardi, G. The evolution of isochore patterns in vertebrate genomes. *BMC Genomics* **10**, 146, doi:10.1186/1471-2164-10-146 (2009).
- 56 Costantini, M., Clay, O., Auletta, F. & Bernardi, G. An isochore map of human chromosomes. *Genome Res* **16**, 536-541, doi:10.1101/gr.4910606 (2006).
- 57 Costantini, M., Auletta, F. & Bernardi, G. Isochore patterns and gene distributions in fish genomes. *Genomics* **90**, 364-371, doi:10.1016/j.ygeno.2007.05.006 (2007).
- 58 Friedlander, M. R. *et al.* Discovering microRNAs from deep sequencing data using miRDeep. *Nat Biotechnol* **26**, 407-415, doi:10.1038/nbt1394 (2008).

- 59 Kozomara, A. & Griffiths-Jones, S. miRBase: integrating microRNA annotation and deep-sequencing data. *Nucleic Acids Res* **39**, D152-157, doi:10.1093/nar/gkq1027 (2011).
- 60 Heimberg, A. M., Cowper-Sal-lari, R., Semon, M., Donoghue, P. C. & Peterson, K. J. microRNAs reveal the interrelationships of hagfish, lampreys, and gnathostomes and the nature of the ancestral vertebrate. *Proc Natl Acad Sci U S A* **107**, 19379-19383, doi:10.1073/pnas.1010350107 (2010).
- 61 Peterson, K. J., Dietrich, M. R. & McPeck, M. A. MicroRNAs and metazoan macroevolution: insights into canalization, complexity, and the Cambrian explosion. *Bioessays* **31**, 736-747, doi:10.1002/bies.200900033 (2009).
- 62 Berezikov, E. Evolution of microRNA diversity and regulation in animals. *Nat Rev Genet* **12**, 846-860, doi:10.1038/nrg3079 (2011).
- 63 Heimberg, A. M., Sempere, L. F., Moy, V. N., Donoghue, P. C. & Peterson, K. J. MicroRNAs and the advent of vertebrate morphological complexity. *Proc Natl Acad Sci U S A* **105**, 2946-2950, doi:10.1073/pnas.0712259105 (2008).
- 64 Zhou, B., Wang, S., Mayr, C., Bartel, D. P. & Lodish, H. F. miR-150, a microRNA expressed in mature B and T cells, blocks early B cell development when expressed prematurely. *Proc Natl Acad Sci U S A* **104**, 7080-7085, doi:10.1073/pnas.0702409104 (2007).
- 65 Xiao, C. *et al.* MiR-150 controls B cell differentiation by targeting the transcription factor c-Myb. *Cell* **131**, 146-159, doi:10.1016/j.cell.2007.07.021 (2007).
- 66 Rayner, K. J. *et al.* MiR-33 contributes to the regulation of cholesterol homeostasis. *Science* **328**, 1570-1573, doi:10.1126/science.1189862 (2010).
- 67 Wijesekara, N. *et al.* miR-33a modulates ABCA1 expression, cholesterol accumulation, and insulin secretion in pancreatic islets. *Diabetes* **61**, 653-658, doi:10.2337/db11-0944 (2012).
- 68 Harris, R. S. Improved pairwise alignment of genomic DNA. *PhD. Thesis, The Pennsylvania State University* (2007).
- 69 Blanchette, M. *et al.* Aligning multiple genomic sequences with the threaded blockset aligner. *Genome Res* **14**, 708-715, doi:10.1101/gr.1933104 (2004).
- 70 Siepel, A. & Haussler, D. Phylogenetic estimation of context-dependent substitution rates by maximum likelihood. *Mol Biol Evol* **21**, 468-488, doi:10.1093/molbev/msh039 (2004).
- 71 Siepel, A. *et al.* Evolutionarily conserved elements in vertebrate, insect, worm, and yeast genomes. *Genome Res* **15**, 1034-1050, doi:10.1101/gr.3715005 (2005).
- 72 Visel, A. *et al.* ChIP-seq accurately predicts tissue-specific activity of enhancers. *Nature* **457**, 854-858, doi:10.1038/nature07730 (2009).
- 73 Visel, A., Minovitsky, S., Dubchak, I. & Pennacchio, L. A. VISTA Enhancer Browser--a database of tissue-specific human enhancers. *Nucleic Acids Res* **35**, D88-92, doi:10.1093/nar/gkl822 (2007).
- 74 Lindblad-Toh, K. *et al.* A high-resolution map of human evolutionary constraint using 29 mammals. *Nature* **478**, 476-482, doi:10.1038/nature10530 (2011).
- 75 Pennacchio, L. A. *et al.* In vivo enhancer analysis of human conserved non-coding sequences. *Nature* **444**, 499-502, doi:10.1038/nature05295 (2006).
- 76 Shin, J. T. *et al.* Human-zebrafish non-coding conserved elements act in vivo to regulate transcription. *Nucleic Acids Res* **33**, 5437-5445, doi:10.1093/nar/gki853 (2005).
- 77 Woolfe, A. *et al.* Highly conserved non-coding sequences are associated with vertebrate development. *PLoS Biol* **3**, e7, doi:10.1371/journal.pbio.0030007 (2005).

- 78 Lee, A. P., Kerk, S. Y., Tan, Y. Y., Brenner, S. & Venkatesh, B. Ancient vertebrate conserved noncoding elements have been evolving rapidly in teleost fishes. *Mol Biol Evol* **28**, 1205-1215, doi:10.1093/molbev/msq304 (2011).
- 79 Brunet, F. G. *et al.* Gene loss and evolutionary rates following whole-genome duplication in teleost fishes. *Mol Biol Evol* **23**, 1808-1816, doi:10.1093/molbev/msl049 (2006).
- 80 Jaillon, O. *et al.* Genome duplication in the teleost fish *Tetraodon nigroviridis* reveals the early vertebrate proto-karyotype. *Nature* **431**, 946-957, doi:10.1038/nature03025 (2004).
- 81 Guo, B., Zou, M. & Wagner, A. Pervasive indels and their evolutionary dynamics after the fish-specific genome duplication. *Mol Biol Evol* **29**, 3005-3022, doi:10.1093/molbev/mss108 (2012).
- 82 Chan, Y. F. *et al.* Adaptive evolution of pelvic reduction in sticklebacks by recurrent deletion of a *Pitx1* enhancer. *Science* **327**, 302-305, doi:10.1126/science.1182213 (2010).
- 83 McLean, C. Y. *et al.* Human-specific loss of regulatory DNA and the evolution of human-specific traits. *Nature* **471**, 216-219, doi:10.1038/nature09774 (2011).
- 84 Remm, M., Storm, C. E. & Sonnhammer, E. L. Automatic clustering of orthologs and in-paralogs from pairwise species comparisons. *J Mol Biol* **314**, 1041-1052, doi:10.1006/jmbi.2000.5197 (2001).
- 85 Alexeyenko, A., Tamas, I., Liu, G. & Sonnhammer, E. L. Automatic clustering of orthologs and inparalogs shared by multiple proteomes. *Bioinformatics* **22**, e9-15, doi:10.1093/bioinformatics/btl213 (2006).
- 86 Castresana, J. Selection of conserved blocks from multiple alignments for their use in phylogenetic analysis. *Mol Biol Evol* **17**, 540-552 (2000).
- 87 Stamatakis, A. RAxML-VI-HPC: maximum likelihood-based phylogenetic analyses with thousands of taxa and mixed models. *Bioinformatics* **22**, 2688-2690, doi:10.1093/bioinformatics/btl446 (2006).
- 88 Ronquist, F. *et al.* MrBayes 3.2: efficient Bayesian phylogenetic inference and model choice across a large model space. *Syst Biol* **61**, 539-542, doi:10.1093/sysbio/sys029 (2012).
- 89 Keane, T. M., Creevey, C. J., Pentony, M. M., Naughton, T. J. & McLnerney, J. O. Assessment of methods for amino acid matrix selection and their use on empirical data shows that ad hoc assumptions for choice of matrix are not justified. *BMC Evol Biol* **6**, 29, doi:10.1186/1471-2148-6-29 (2006).
- 90 Jones, D. T., Taylor, W. R. & Thornton, J. M. The rapid generation of mutation data matrices from protein sequences. *Comput Appl Biosci* **8**, 275-282, doi:10.1093/bioinformatics/8.3.275 (1992).
- 91 Altekar, G., Dwarkadas, S., Huelsenbeck, J. P. & Ronquist, F. Parallel Metropolis coupled Markov chain Monte Carlo for Bayesian phylogenetic inference. *Bioinformatics* **20**, 407-415, doi:10.1093/bioinformatics/btg427 (2004).
- 92 Shimodaira, H. & Hasegawa, M. CONSEL: for assessing the confidence of phylogenetic tree selection. *Bioinformatics* **17**, 1246-1247, doi:10.1093/bioinformatics/17.12.1246 (2001).
- 93 Blair, J. E. & Hedges, S. B. Molecular phylogeny and divergence times of deuterostome animals. *Mol Biol Evol* **22**, 2275-2284, doi:10.1093/molbev/msi225 (2005).
- 94 Wang, J., Lee, A. P., Kodzius, R., Brenner, S. & Venkatesh, B. Large number of ultraconserved elements were already present in the jawed vertebrate ancestor. *Mol Biol Evol* **26**, 487-490, doi:10.1093/molbev/msn278 (2009).

- 95 Arnason, U., Gullberg, A., Janke, A., Joss, J. & Elmerot, C. Mitogenomic analyses of deep gnathostome divergences: a fish is a fish. *Gene* **333**, 61-70, doi:10.1016/j.gene.2004.02.014 (2004).
- 96 Janvier, P. *Early vertebrates*. (Oxford University Press, 1996).
- 97 Arnason, U., Gullberg, A. & Janke, A. Molecular phylogenetics of gnathostomous (jawed) fishes: old bones, new cartilage. *Zool Scr* **30**, 249-255, doi:10.1046/j.1463-6409.2001.00067.x (2001).
- 98 Rasmussen, A. S. & Arnason, U. Molecular studies suggest that cartilaginous fishes have a terminal position in the piscine tree. *Proc Natl Acad Sci U S A* **96**, 2177-2182, doi:10.1073/pnas.96.5.2177 (1999).
- 99 Takezaki, N., Figueroa, F., Zaleska-Rutczynska, Z. & Klein, J. Molecular phylogeny of early vertebrates: monophyly of the agnathans as revealed by sequences of 35 genes. *Mol Biol Evol* **20**, 287-292, doi:10.1093/molbev/msg040 (2003).
- 100 Kikugawa, K. *et al.* Basal jawed vertebrate phylogeny inferred from multiple nuclear DNA-coded genes. *BMC Biol* **2**, 3, doi:10.1186/1741-7007-2-3 (2004).
- 101 Hallstrom, B. M. & Janke, A. Gnathostome phylogenomics utilizing lungfish EST sequences. *Mol Biol Evol* **26**, 463-471, doi:10.1093/molbev/msn271 (2009).
- 102 Roy, S. W. & Gilbert, W. Resolution of a deep animal divergence by the pattern of intron conservation. *Proc Natl Acad Sci U S A* **102**, 4403-4408, doi:10.1073/pnas.0409891102 (2005).
- 103 Roy, S. W. & Irimia, M. Rare genomic characters do not support Coelomata: intron loss/gain. *Mol Biol Evol* **25**, 620-623, doi:10.1093/molbev/msn035 (2008).
- 104 Takezaki, N., Rzhetsky, A. & Nei, M. Phylogenetic test of the molecular clock and linearized trees. *Mol Biol Evol* **12**, 823-833 (1995).
- 105 Nei, M. & Kumar, S. *Molecular evolution and phylogenetics*. (Oxford University Press, 2000).
- 106 Tamura, K. *et al.* MEGA5: molecular evolutionary genetics analysis using maximum likelihood, evolutionary distance, and maximum parsimony methods. *Mol Biol Evol* **28**, 2731-2739, doi:10.1093/molbev/msr121 (2011).
- 107 Venditti, C., Meade, A. & Pagel, M. Detecting the node-density artifact in phylogeny reconstruction. *Syst Biol* **55**, 637-643, doi:10.1080/10635150600865567 (2006).
- 108 Suyama, M., Torrents, D. & Bork, P. PAL2NAL: robust conversion of protein sequence alignments into the corresponding codon alignments. *Nucleic Acids Res* **34**, W609-612, doi:10.1093/nar/gkl315 (2006).
- 109 Hubisz, M. J., Pollard, K. S. & Siepel, A. PHAST and RPHAST: phylogenetic analysis with space/time models. *Brief Bioinform* **12**, 41-51, doi:10.1093/bib/bbq072 (2011).
- 110 Lanave, C., Preparata, G., Saccone, C. & Serio, G. A new method for calculating evolutionary substitution rates. *J Mol Evol* **20**, 86-93, doi:10.1007/BF02101990 (1984).
- 111 Paradis, E., Claude, J. & Strimmer, K. APE: Analyses of Phylogenetics and Evolution in R language. *Bioinformatics* **20**, 289-290, doi:10.1093/bioinformatics/btg412 (2004).
- 112 Martin, A. P., Naylor, G. J. & Palumbi, S. R. Rates of mitochondrial DNA evolution in sharks are slow compared with mammals. *Nature* **357**, 153-155, doi:10.1038/357153a0 (1992).
- 113 Martin, A. P. Substitution rates of organelle and nuclear genes in sharks: implicating metabolic rate (again). *Mol Biol Evol* **16**, 996-1002 (1999).



- 114 Abramyan, J. *et al.* The western painted turtle genome, a model for the evolution of extreme physiological adaptations in a slowly evolving lineage. *Genome Biol* **14**, R28, doi:gb-2013-14-3-r28 [pii]10.1186/ (2013).
- 115 Britten, R. J. Rates of DNA sequence evolution differ between taxonomic groups. *Science* **231**, 1393-1398, doi:10.1126/science.3082006 (1986).
- 116 Martin, A. P. & Palumbi, S. R. Body size, metabolic rate, generation time, and the molecular clock. *Proc Natl Acad Sci U S A* **90**, 4087-4091, doi:10.1073/pnas.90.9.4087 (1993).
- 117 Schlotterer, C., Amos, B. & Tautz, D. Conservation of polymorphic simple sequence loci in cetacean species. *Nature* **354**, 63-65, doi:10.1038/354063a0 (1991).
- 118 Last, P. R. & Stevens, J. D. *Sharks and rays of Australia*. (CSIRO Australia, 1994).
- 119 Sullivan, K. J. Age and growth of the elephant fish *Callorhynchus milii* (Elasmobranchii: Callorhynchidae). *N. Z. J. Mar. Freshwater Res.* **11**, 745-753, doi:10.1080/00288330.1977.9515710 (1978).
- 120 Gorman, T. B. S. Biological and economic aspects of the elephant fish, *Callorhynchus milii* Bory, in Pegasus Bay and the Canterbury Bight. 53 (1963).
- 121 Parsons, G. R. Metabolism and swimming efficiency of the bonnethead shark *Sphyrna tiburo*. *Mar Biol* **104**, 363-367, doi:10.1007/BF01314338 (1990).
- 122 Carrier, J. C., Musick, J. A. & Heithaus, M. R. *Biology of sharks and their relatives*. (CRC Press, 2004).
- 123 Richter, C., Park, J. W. & Ames, B. N. Normal oxidative damage to mitochondrial and nuclear DNA is extensive. *Proc Natl Acad Sci U S A* **85**, 6465-6467 (1988).
- 124 Wagner, J. R., Hu, C. C. & Ames, B. N. Endogenous oxidative damage of deoxycytidine in DNA. *Proc Natl Acad Sci U S A* **89**, 3380-3384, doi:10.1073/pnas.89.8.3380 (1992).
- 125 Coulombe-Huntington, J. & Majewski, J. Characterization of intron loss events in mammals. *Genome Res* **17**, 23-32, doi:10.1101/gr.5703406 (2007).
- 126 Loh, Y. H., Brenner, S. & Venkatesh, B. Investigation of loss and gain of introns in the compact genomes of pufferfishes (*Fugu* and *Tetraodon*). *Mol Biol Evol* **25**, 526-535, doi:10.1093/molbev/msm278 (2008).
- 127 Roy, S. W., Fedorov, A. & Gilbert, W. Large-scale comparison of intron positions in mammalian genes shows intron loss but no gain. *Proc Natl Acad Sci U S A* **100**, 7158-7162, doi:10.1073/pnas.1232297100 (2003).
- 128 Proost, S. *et al.* i-ADHoRe 3.0--fast and sensitive detection of genomic homology in extremely large data sets. *Nucleic acids research* **40**, e11, doi:10.1093/nar/gkr955 (2012).
- 129 Kohn, M. *et al.* Reconstruction of a 450-My-old ancestral vertebrate protokaryotype. *Trends in genetics : TIG* **22**, 203-210, doi:10.1016/j.tig.2006.02.008 (2006).
- 130 Nakatani, Y., Takeda, H., Kohara, Y. & Morishita, S. Reconstruction of the vertebrate ancestral genome reveals dynamic genome reorganization in early vertebrates. *Genome Res* **17**, 1254-1265, doi:10.1101/gr.6316407 (2007).
- 131 Christoffels, A. *et al.* *Fugu* genome analysis provides evidence for a whole-genome duplication early during the evolution of ray-finned fishes. *Mol Biol Evol* **21**, 1146-1151, doi:10.1093/molbev/msh114 (2004).
- 132 Ellegren, H. Evolutionary stasis: the stable chromosomes of birds. *Trends Ecol Evol* **25**, 283-291, doi:10.1016/j.tree.2009.12.004 (2010).
- 133 Burt, D. W. Origin and evolution of avian microchromosomes. *Cytogenet Genome Res* **96**, 97-112, doi:10.1159/000063018 (2002).

- 134 Spitz, F., Gonzalez, F. & Duboule, D. A global control region defines a chromosomal regulatory landscape containing the HoxD cluster. *Cell* **113**, 405-417, doi:10.1016/S0092-8674(03)00310-6 (2003).
- 135 Zakany, J., Kmita, M. & Duboule, D. A dual role for Hox genes in limb anterior-posterior asymmetry. *Science* **304**, 1669-1672, doi:10.1126/science.1096049 (2004).
- 136 Montavon, T. *et al.* A regulatory archipelago controls Hox genes transcription in digits. *Cell* **147**, 1132-1145, doi:10.1016/j.cell.2011.10.023 (2011).
- 137 Kikuta, H. *et al.* Genomic regulatory blocks encompass multiple neighboring genes and maintain conserved synteny in vertebrates. *Genome Res* **17**, 545-555, doi:10.1101/gr.6086307 (2007).
- 138 Voss, S. R. *et al.* Origin of amphibian and avian chromosomes by fission, fusion, and retention of ancestral chromosomes. *Genome Res* **21**, 1306-1312, doi:10.1101/gr.116491.110 (2011).
- 139 Ohno, S. *et al.* Microchromosomes in holocephalian, chondrosteian and holostean fishes. *Chromosoma* **26**, 35-40 (1969).
- 140 Hanna, R. N. *et al.* Characterization and expression of the nuclear progesterin receptor in zebrafish gonads and brain. *Biol Reprod* **82**, 112-122, doi:10.1095/biolreprod.109.078527 (2010).
- 141 Tsang, P. & Callard, I. P. Luteal progesterone production and regulation in the viviparous dogfish, *Squalus acanthias*. *J Exp Zool* **241**, 377-382, doi:10.1002/jez.1402410313 (1987).
- 142 Pinter, J. & Thomas, P. The ovarian progestogen receptor in the spotted seatrout, *Cynoscion nebulosus*, demonstrates steroid specificity different from progesterone receptors in other vertebrates. *J Steroid Biochem Mol Biol* **60**, 113-119 (1997).
- 143 Alegre-Cebollada, J., Onaderra, M., Gavilanes, J. G. & del Pozo, A. M. Sea anemone actinoporins: the transition from a folded soluble state to a functionally active membrane-bound oligomeric pore. *Curr Protein Pept Sci* **8**, 558-572, doi:10.2174/138920307783018686 (2007).
- 144 van der Aa, L. M. *et al.* A large new subset of TRIM genes highly diversified by duplication and positive selection in teleost fish. *BMC Biol* **7**, 7, doi:10.1186/1741-7007-7-7 (2009).
- 145 Boudinot, P. *et al.* Origin and evolution of TRIM proteins: new insights from the complete TRIM repertoire of zebrafish and pufferfish. *PLoS One* **6**, e22022, doi:10.1371/journal.pone.0022022 (2011).
- 146 Zhang, J. *et al.* Loss of fish actinotrichia proteins and the fin-to-limb transition. *Nature* **466**, 234-237, doi:10.1038/nature09137 (2010).
- 147 Nechiporuk, A. & Raible, D. W. FGF-dependent mechanosensory organ patterning in zebrafish. *Science* **320**, 1774-1777, doi:10.1126/science.1156547 (2008).
- 148 Niimura, Y. On the origin and evolution of vertebrate olfactory receptor genes: comparative genome analysis among 23 chordate species. *Genome Biol Evol* **1**, 34-44, doi:10.1093/gbe/evp003 (2009).
- 149 Jayatilake, G. S., Huddleston, J. A. & Abraham, E. P. Conversion of isopenicillin N into penicillin N in cell-free extracts of *Cephalosporium acremonium*. *Biochem J* **194**, 645-647 (1981).
- 150 Ueda, A., Nagai, H., Ishida, M., Nagashima, Y. & Shiomi, K. Purification and molecular cloning of SE-cephalotoxin, a novel proteinaceous toxin from the posterior salivary gland of cuttlefish *Sepia esculenta*. *Toxicon* **52**, 574-581, doi:10.1016/j.toxicon.2008.07.007 (2008).

- 151 Abrantes, K. G. & Barnett, A. Intrapopulation variations in diet and habitat use in a marine apex predator, the broadnose sevengill shark *Notorynchus cepedianus*. *Mar Ecol Prog Ser* **442**, 133-148, doi:10.3354/meps09395 (2011).
- 152 Niimura, Y. & Nei, M. Extensive gains and losses of olfactory receptor genes in mammalian evolution. *PLoS One* **2**, e708, doi:10.1371/journal.pone.0000708 (2007).
- 153 Schultz, J., Milpetz, F., Bork, P. & Ponting, C. P. SMART, a simple modular architecture research tool: identification of signaling domains. *Proc Natl Acad Sci U S A* **95**, 5857-5864 (1998).
- 154 Katoh, K., Misawa, K., Kuma, K. & Miyata, T. MAFFT: a novel method for rapid multiple sequence alignment based on fast Fourier transform. *Nucleic Acids Res* **30**, 3059-3066 (2002).
- 155 Lisney, T. J. A review of the sensory biology of chimaeroid fishes. *Rev Fish Biol Fisheries* **20**, 571-590, doi:10.1007/s11160-010-9162-x (2010).
- 156 Warren, W. C. *et al.* Genome analysis of the platypus reveals unique signatures of evolution. *Nature* **453**, 175-183, doi:10.1038/nature06936 (2008).
- 157 Grus, W. E. & Zhang, J. Origin and evolution of the vertebrate vomeronasal system viewed through system-specific genes. *Bioessays* **28**, 709-718, doi:10.1002/bies.20432 (2006).
- 158 Naito, T. *et al.* Putative pheromone receptors related to the Ca<sup>2+</sup>-sensing receptor in Fugu. *Proc Natl Acad Sci U S A* **95**, 5178-5181 (1998).
- 159 Pfister, P. & Rodriguez, I. Olfactory expression of a single and highly variable V1r pheromone receptor-like gene in fish species. *Proc Natl Acad Sci U S A* **102**, 5489-5494, doi:10.1073/pnas.0402581102 (2005).
- 160 Grus, W. E. & Zhang, J. Origin of the genetic components of the vomeronasal system in the common ancestor of all extant vertebrates. *Mol Biol Evol* **26**, 407-419, doi:10.1093/molbev/msn262 (2009).
- 161 Alioto, T. S. & Ngai, J. The repertoire of olfactory C family G protein-coupled receptors in zebrafish: candidate chemosensory receptors for amino acids. *BMC Genomics* **7**, 309, doi:10.1186/1471-2164-7-309 (2006).
- 162 Saraiva, L. R. & Korsching, S. I. A novel olfactory receptor gene family in teleost fish. *Genome Res* **17**, 1448-1457, doi:10.1101/gr.6553207 (2007).
- 163 Shi, P. & Zhang, J. Comparative genomic analysis identifies an evolutionary shift of vomeronasal receptor gene repertoires in the vertebrate transition from water to land. *Genome Res* **17**, 166-174, doi:10.1101/gr.6040007 (2007).
- 164 Zhang, J. & Webb, D. M. Evolutionary deterioration of the vomeronasal pheromone transduction pathway in catarrhine primates. *Proc Natl Acad Sci U S A* **100**, 8337-8341, doi:10.1073/pnas.1331721100 (2003).
- 165 Johnstone, K. A. *et al.* Genomic organization and evolution of the vomeronasal type 2 receptor-like (OlfC) gene clusters in Atlantic salmon, *Salmo salar*. *Mol Biol Evol* **26**, 1117-1125, doi:10.1093/molbev/msp027 (2009).
- 166 Altschul, S. F. *et al.* Gapped BLAST and PSI-BLAST: a new generation of protein database search programs. *Nucleic Acids Res* **25**, 3389-3402, doi:10.1093/nar/25.17.3389 (1997).
- 167 Vortkamp, A. *et al.* Regulation of rate of cartilage differentiation by Indian hedgehog and PTH-related protein. *Science* **273**, 613-622, doi:10.1126/science.273.5275.613 (1996).
- 168 St-Jacques, B., Hammerschmidt, M. & McMahon, A. P. Indian hedgehog signaling regulates proliferation and differentiation of chondrocytes and is essential for bone formation. *Genes Dev* **13**, 2072-2086 (1999).

- 169 Ingham, P. W., Nakano, Y. & Seger, C. Mechanisms and functions of Hedgehog signalling across the metazoa. *Nat Rev Genet* **12**, 393-406, doi:10.1038/nrg2984 (2011).
- 170 Karsenty, G., Kronenberg, H. M. & Settembre, C. Genetic control of bone formation. *Annu Rev Cell Dev Biol* **25**, 629-648, doi:10.1146/annurev.cellbio.042308.113308 (2009).
- 171 Liu, Y. *et al.* Parathyroid hormone gene family in a cartilaginous fish, the elephant shark (*Callorhynchus milii*). *J Bone Miner Res* **25**, 2613-2623, doi:10.1002/jbmr.178 (2010).
- 172 Kawasaki, K., Buchanan, A. V. & Weiss, K. M. Gene duplication and the evolution of vertebrate skeletal mineralization. *Cells Tissues Organs* **186**, 7-24, doi:10.1159/000102678 (2007).
- 173 Kawasaki, K. The SCPP gene family and the complexity of hard tissues in vertebrates. *Cells Tissues Organs* **194**, 108-112, doi:10.1159/000324225 (2011).
- 174 Kawasaki, K. The SCPP gene repertoire in bony vertebrates and graded differences in mineralized tissues. *Dev Genes Evol* **219**, 147-157, doi:10.1007/s00427-009-0276-x (2009).
- 175 King, B. L., Gillis, J. A., Carlisle, H. R. & Dahn, R. D. A natural deletion of the *HoxC* cluster in elasmobranch fishes. *Science* **334**, 1517, doi:10.1126/science.1210912 (2011).
- 176 Staines, K. A., MacRae, V. E. & Farquharson, C. The importance of the SIBLING family of proteins on skeletal mineralisation and bone remodelling. *J Endocrinol* **214**, 241-255, doi:10.1530/JOE-12-0143 (2012).
- 177 Kawasaki, K., Buchanan, A. V. & Weiss, K. M. Biomineralization in humans: making the hard choices in life. *Annu Rev Genet* **43**, 119-142, doi:10.1146/annurev-genet-102108-134242 (2009).
- 178 Styrkarsdottir, U. *et al.* New sequence variants associated with bone mineral density. *Nat Genet* **41**, 15-17, doi:10.1038/ng.284 (2009).
- 179 Duncan, E. L. *et al.* Genome-wide association study using extreme truncate selection identifies novel genes affecting bone mineral density and fracture risk. *PLoS Genet* **7**, e1001372, doi:10.1371/journal.pgen.1001372 (2011).
- 180 Koller, D. L. *et al.* Genome-wide association study of bone mineral density in premenopausal European-American women and replication in African-American women. *J Clin Endocrinol Metab* **95**, 1802-1809, doi:10.1210/jc.2009-1903 (2010).
- 181 Hwang, W. Y. *et al.* Efficient genome editing in zebrafish using a CRISPR-Cas system. *Nat Biotechnol* **31**, 227-229, doi:10.1038/nbt.2501 (2013).
- 182 DeLaurier, A. *et al.* Zebrafish sp7:EGFP: a transgenic for studying otic vesicle formation, skeletogenesis, and bone regeneration. *Genesis* **48**, 505-511, doi:10.1002/dvg.20639 (2010).
- 183 Laue, K., Jänicke, M., Plaster, N., Sonntag, C. & Hammerschmidt, M. Restriction of retinoic acid activity by *Cyp26b1* is required for proper timing and patterning of osteogenesis during zebrafish development. *Development*, doi:10.1242/dev.021238 (2008).
- 184 Boskey, A. L., Spevak, L., Paschalis, E., Doty, S. B. & McKee, M. D. Osteopontin deficiency increases mineral content and mineral crystallinity in mouse bone. *Calcif Tissue Int* **71**, 145-154, doi:10.1007/s00223-001-1121-z (2002).
- 185 Malaval, L. *et al.* Bone sialoprotein plays a functional role in bone formation and osteoclastogenesis. *J Exp Med* **205**, 1145-1153, doi:10.1084/jem.20071294 (2008).

- 186 Hinds, K. R. & Litman, G. W. Major reorganization of immunoglobulin V<sub>H</sub> segmental elements during vertebrate evolution. *Nature* **320**, 546-549, doi:10.1038/320546a0 (1986).
- 187 Lee, V. *et al.* The evolution of multiple isotypic IgM heavy chain genes in the shark. *J. Immunol.* **180**, 7461-7470 (2008).
- 188 Du Pasquier, L. Fish 'n' TRIMs. *J Biol* **8**, 50, doi:10.1186/jbiol1150 (2009).
- 189 Ohta, Y. *et al.* Primordial linkage of  $\beta 2$ -Microglobulin to the MHC. *J. Immunol.* **186**, 3563-3571, doi:10.4049/jimmunol.1003933 (2011).
- 190 Rast, J. P., Amemiya, C. T., Litman, R. T., Strong, S. J. & Litman, G. W. Distinct patterns of IgH structure and organization in a divergent lineage of chondrichthyan fishes. *Immunogenetics* **47**, 234-245 (1998).
- 191 Dooley, H. & Flajnik, M. F. Antibody repertoire development in cartilaginous fish. *Dev Comp Immunol* **30**, 43-56, doi:10.1016/j.dci.2005.06.022 (2006).
- 192 Criscitiello, M. F., Saltis, M. & Flajnik, M. F. An evolutionarily mobile antigen receptor variable region gene: Doubly rearranging NAR-TcR genes in sharks. *Proc. Natl. Acad. Sci. USA* **103**, 5036-5041, doi:10.1073/pnas.0507074103 (2006).
- 193 Parra, Z. E., Ohta, Y., Criscitiello, M. F., Flajnik, M. F. & Miller, R. D. The dynamic TCR $\delta$ : TCR $\delta$  chains in the amphibian *Xenopus tropicalis* utilize antibody-like V genes. *Eur. J. Immunol.* **40**, 2319-2329, doi:10.1002/eji.201040515 (2010).
- 194 Parra, Z. E., Mitchell, K., Dalloul, R. A. & Miller, R. D. A second TCR $\delta$  locus in Galliformes uses antibody-like V domains: insight into the evolution of TCR $\delta$  and TCR $\mu$  genes in tetrapods. *J. Immunol.* **188**, 3912-3919, doi:10.4049/jimmunol.1103521 (2012).
- 195 Parra, Z. E., Lillie, M. & Miller, R. D. A model for the evolution of the mammalian t-cell receptor  $\alpha\delta$  and  $\mu$  loci based on evidence from the duckbill platypus. *Mol. Biol. Evol.* **29**, 3205-3214, doi:10.1093/molbev/mss128 (2012).
- 196 Criscitiello, M. F. & Flajnik, M. F. Four primordial immunoglobulin light chain isotypes, including  $\lambda$  and  $\kappa$ , identified in the most primitive living jawed vertebrates. *Eur. J. Immunol.* **37**, 2683-2694, doi:10.1002/eji.200737263 (2007).
- 197 Anderson, M. K., Shablott, M. J., Litman, R. T. & Litman, G. W. Generation of immunoglobulin light chain gene diversity in *Raja erinacea* is not associated with somatic rearrangement, an exception to a central paradigm of B cell immunity. *J. Exp. Med.* **182**, 109-119, doi:10.1084/jem.182.1.109 (1995).
- 198 Chen, H. *et al.* Characterization of arrangement and expression of the T cell receptor gamma locus in the sandbar shark. *Proc Natl Acad Sci U S A* **106**, 8591-8596, doi:10.1073/pnas.0811283106 (2009).
- 199 Flajnik, M. F. & Kasahara, M. Origin and evolution of the adaptive immune system: genetic events and selective pressures. *Nat. Rev. Genet.* **11**, 47-59, doi:10.1038/nrg2703 (2010).
- 200 Bartl, S., Baish, M. A., Flajnik, M. F. & Ohta, Y. Identification of class I genes in cartilaginous fish, the most ancient group of vertebrates displaying an adaptive immune response. *J Immunol* **159**, 6097-6104 (1997).
- 201 Ohta, Y. *et al.* Primitive synteny of vertebrate major histocompatibility complex class I and class II genes. *Proc Natl Acad Sci U S A* **97**, 4712-4717, doi:10.1073/pnas.97.9.4712 (2000).
- 202 Ohta, Y., McKinney, E. C., Criscitiello, M. F. & Flajnik, M. F. Proteasome, transporter associated with antigen processing, and class I genes in the nurse shark *Ginglymostoma cirratum*: evidence for a stable class I region and MHC haplotype lineages. *J. Immunol.* **168**, 771-781 (2002).

- 203 Flajnik, M. F., Tlapakova, T., Criscitiello, M. F., Krylov, V. & Ohta, Y. Evolution of the B7 family: co-evolution of B7H6 and NKp30, identification of a new B7 family member, B7H7, and of B7's historical relationship with the MHC. *Immunogenetics* **64**, 571-590, doi:10.1007/s00251-012-0616-2 (2012).
- 204 Nonaka, M. & Kimura, A. Genomic view of the evolution of the complement system. *Immunogenetics* **58**, 701-713, doi:10.1007/s00251-006-0142-1 (2006).
- 205 Shin, D.-H., Webb, B., Nakao, M. & Smith, S. L. Molecular cloning, structural analysis and expression of complement component Bf/C2 genes in the nurse shark, *Ginglymostoma cirratum*. *Dev Comp Immunol* **31**, 1168-1182, doi:10.1016/j.dci.2007.03.001 (2007).
- 206 Nomiya, H., Osada, N. & Yoshie, O. Systematic classification of vertebrate chemokines based on conserved synteny and evolutionary history. *Genes Cells* **18**, 1-16, doi:10.1111/gtc.12013 (2013).
- 207 Robertsen, B. The interferon system of teleost fish. *Fish Shellfish Immunol* **20**, 172-191, doi:10.1016/j.fsi.2005.01.010 (2006).
- 208 Wang, T., Huang, W., Costa, M. M. & Secombes, C. J. The gamma-chain cytokine/receptor system in fish: More ligands and receptors. *Fish Shellfish Immunol* **31**, 673-687, doi:10.1016/j.fsi.2011.05.016 (2011).
- 209 Cherrier, M. & Eberl, G. The development of LT $\alpha$  cells. *Curr Opin Immunol* **24**, 178-183, doi:10.1016/j.coi.2012.02.003 (2012).
- 210 Andersen, K. G., Nissen, J. K. & Betz, A. G. Comparative genomics reveals key gain-of-function events in Foxp3 during regulatory T cell evolution. *Front Immunol* **3**, 113, doi:10.3389/fimmu.2012.00113 (2012).
- 211 Taniuchi, I. & Ellmeier, W. Transcriptional and epigenetic regulation of CD4/CD8 lineage choice. *Adv Immunol* **110**, 71-110, doi:10.1016/B978-0-12-387663-8.00003-X (2011).
- 212 Shaw, A. S. *et al.* Short related sequences in the cytoplasmic domains of CD4 and CD8 mediate binding to the amino-terminal domain of the p56<sup>lck</sup> tyrosine protein kinase. *Mol Cell Biol* **10**, 1853-1862, doi:10.1128/MCB.10.5.1853 (1990).
- 213 Li, B. & Dewey, C. N. RSEM: accurate transcript quantification from RNA-Seq data with or without a reference genome. *BMC Bioinformatics* **12**, 323, doi:10.1186/1471-2105-12-323 (2011).
- 214 Spits, H. *et al.* Innate lymphoid cells - a proposal for uniform nomenclature. *Nat Rev Immunol* **13**, 145-149, doi:10.1038/nri3365 (2013).
- 215 Criscitiello, M. F., Ohta, Y., Saltis, M., McKinney, E. C. & Flajnik, M. F. Evolutionarily conserved TCR binding sites, identification of T cells in primary lymphoid tissues, and surprising trans-rearrangements in nurse shark. *J. Immunol.* **184**, 6950-6960, doi:10.4049/jimmunol.0902774 (2010).
- 216 Nehls, M. *et al.* Two genetically separable steps in the differentiation of thymic epithelium. *Science* **272**, 886-889 (1996).
- 217 Anderson, M. S. *et al.* Projection of an immunological self shadow within the thymus by the aire protein. *Science* **298**, 1395-1401, doi:10.1126/science.1075958 (2002).
- 218 Roberts, C. W. M., Shutter, J. R. & Korsmeyer, S. J. *Hox11* controls the genesis of the spleen. *Nature* **368**, 747-749, doi:10.1038/368747a0 (1994).
- 219 Spolski, R. & Leonard, W. J. IL-21 and T follicular helper cells. *Int Immunol* **22**, 7-12, doi:10.1093/intimm/dxp112 (2010).
- 220 Chien, Y.-H., Iwashima, M., Kaplan, K. B., Elliott, J. F. & Davis, M. M. A new T-cell receptor gene located within the alpha locus and expressed early in T-cell differentiation. *Nature* **327**, 677-682, doi:10.1038/327677a0 (1987).

- 221 Locksley, R. M., Killeen, N. & Lenardo, M. J. The TNF and TNF receptor superfamilies: integrating mammalian biology. *Cell* **104**, 487-501, doi:10.1016/S0092-8674(01)00237-9 (2001).
- 222 Dooley, H. & Flajnik, M. F. Shark immunity bites back: affinity maturation and memory response in the nurse shark, *Ginglymostoma cirratum*. *Eur. J. Immunol.* **35**, 936-945, doi:10.1002/eji.200425760 (2005).
- 223 Fontenot, J. D., Rasmussen, J. P., Gavin, M. A. & Rudensky, A. Y. A function for interleukin 2 in Foxp3-expressing regulatory T cells. *Nat Immunol* **6**, 1142-1151, doi:10.1038/ni1263 (2005).
- 224 Ivanov, II, Zhou, L. & Littman, D. R. Transcriptional regulation of Th17 cell differentiation. *Semin. Immunol.* **19**, 409-417, doi:10.1016/j.smim.2007.10.011 (2007).

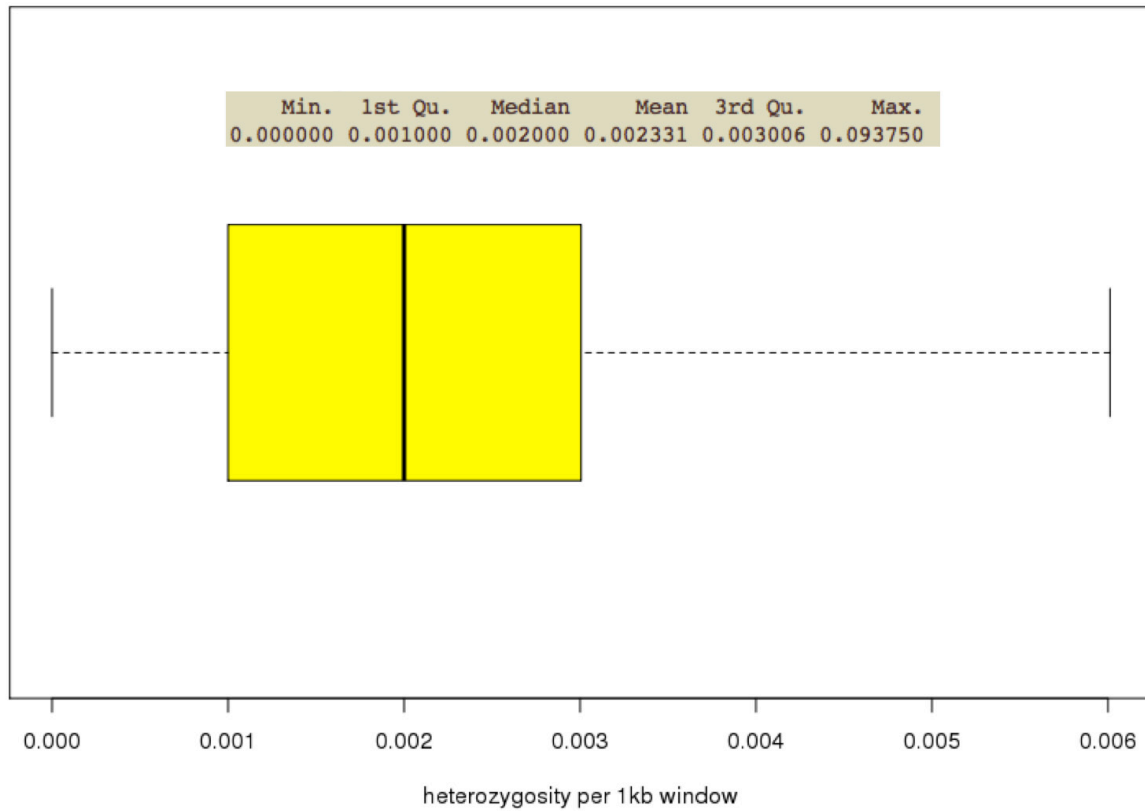

**Supplementary Figure I.1 | Boxplot of the heterozygosity in 1-kb windows of callable *C. milii* genome.**



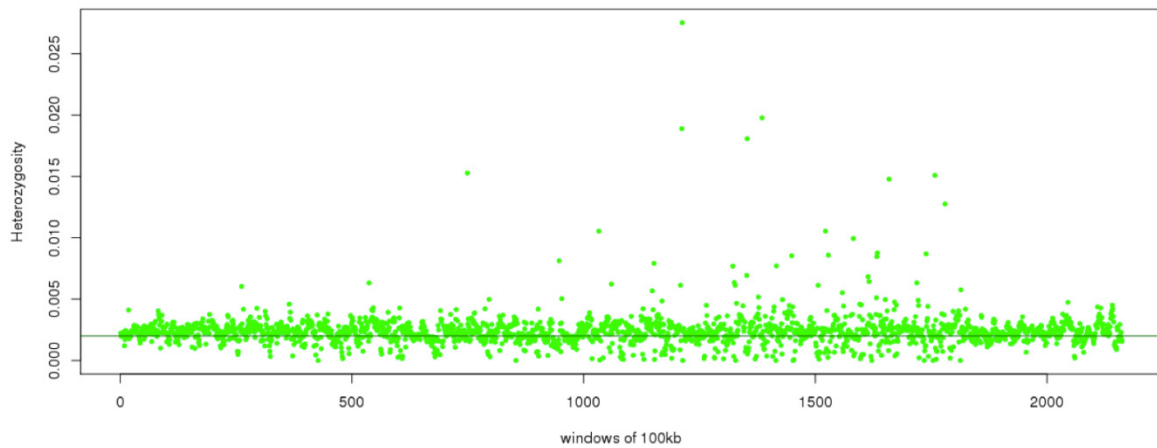

**Supplementary Figure I.2 | Mean heterozygosity in 100 windows of 1-kb of callable *C. milii* genome.**

The median for the windows is plotted as a horizontal line at 0.002.

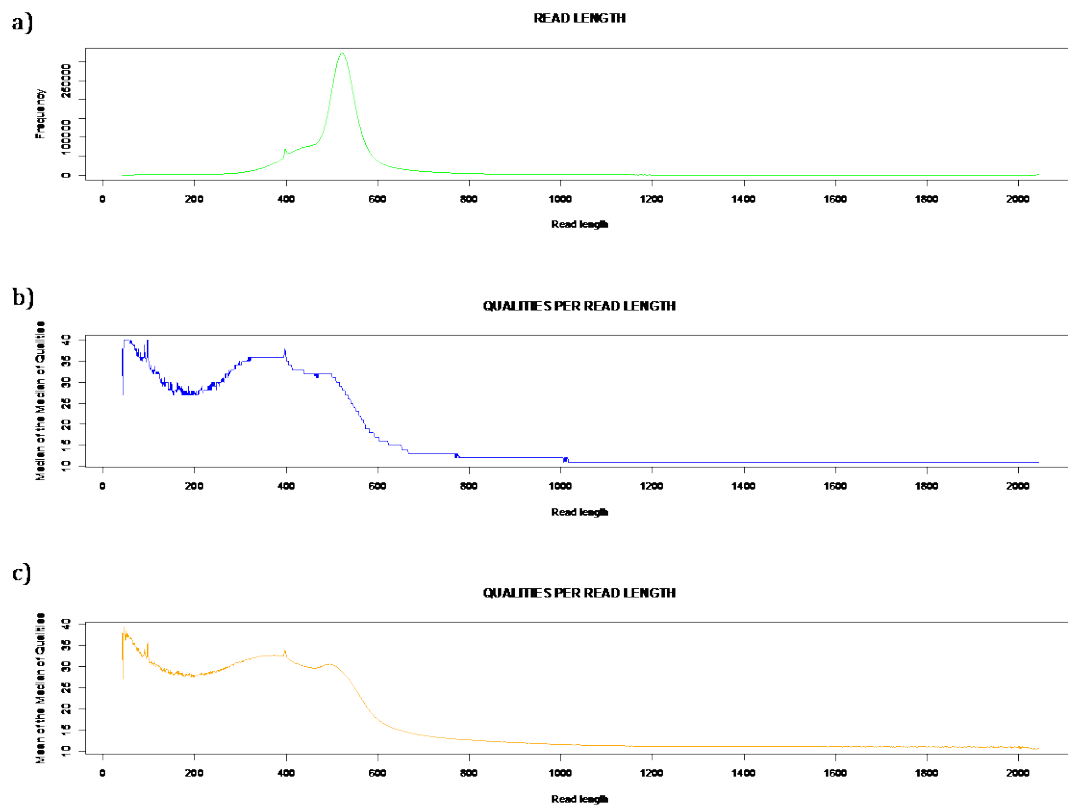

### Supplementary Figure I.3 | Quality assessment of the Roche 454 reads:

a) Read length distribution, b) median read quality per read length, c) mean read quality per read length.

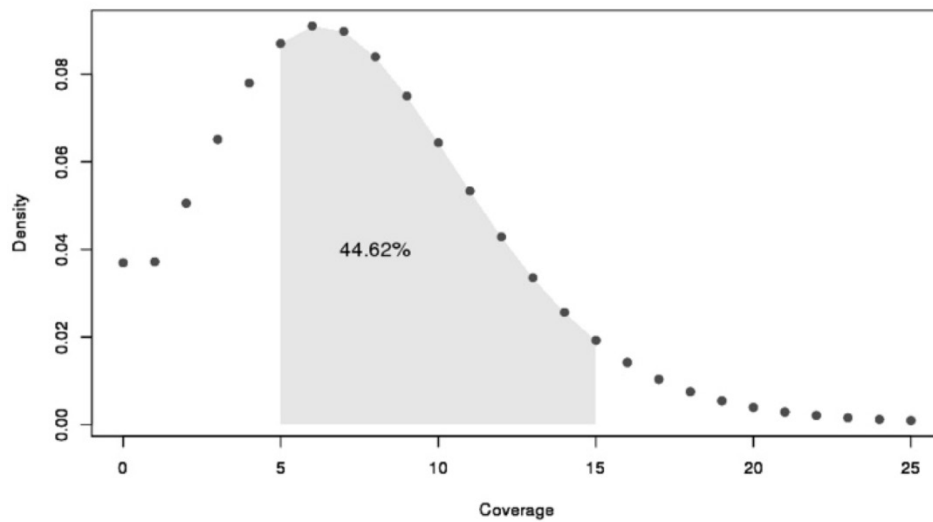

**Supplementary Figure I.4 | Coverage distribution per non-repetitive base pair of the *C. milii* genome.**

The figure inset represents the proportion of the genome with 5-15× coverage relative to the total length of the assembly.

a

|               | all scaffolds | scaffolds > 2 kb | scaffolds > 20 kb | scaffolds > 50 kb |
|---------------|---------------|------------------|-------------------|-------------------|
| <b>Mean</b>   | 0.9938        | 0.9947           | 0.9973            | 0.9975            |
| <b>Median</b> | 1             | 1                | 1                 | 1                 |

b

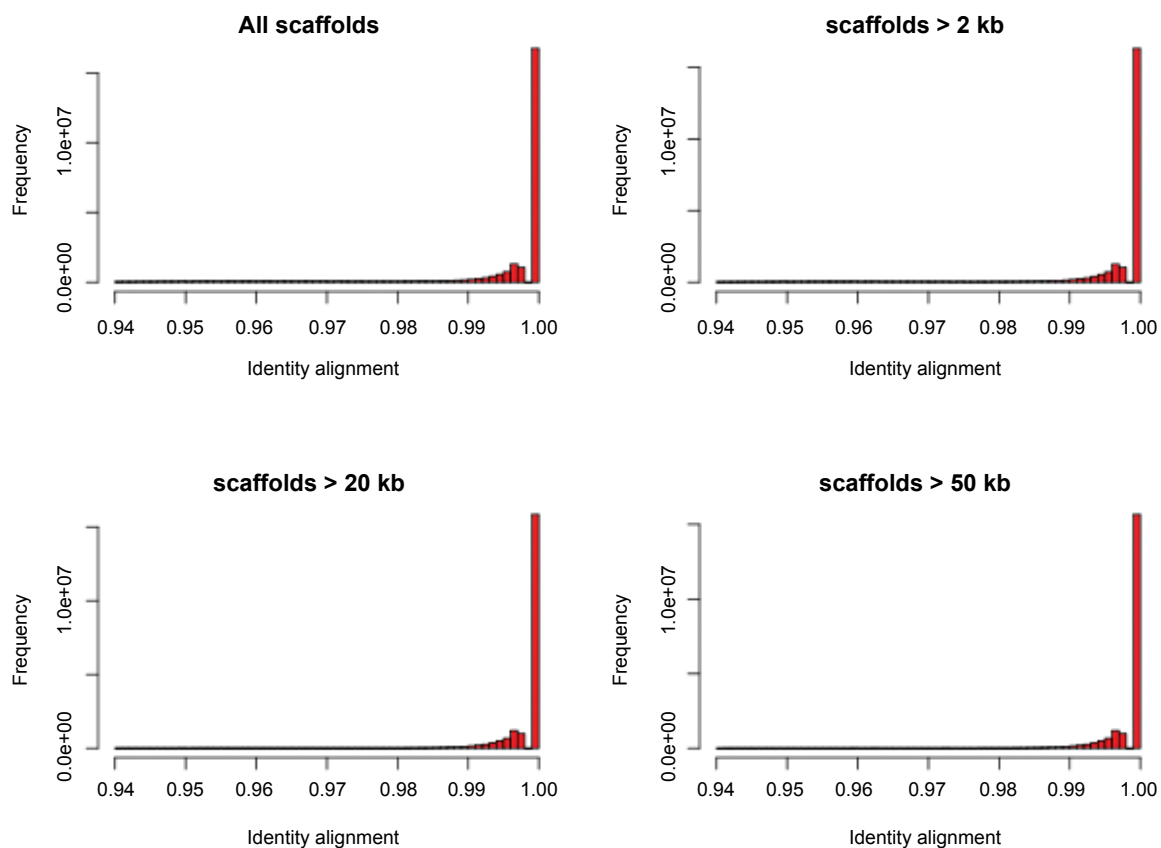

### Supplementary Figure I.5 | Sequence identity of reads to reference genome according to the scaffold length.

a) Mean and median; b) distribution.

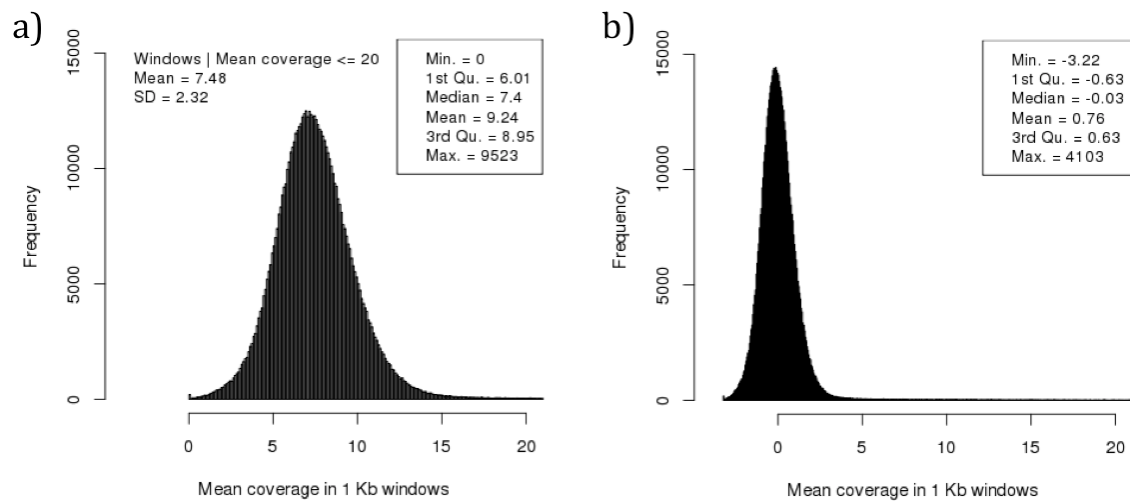

**Supplementary Figure I.6 | Mean coverage of the *C. milii* genome before and after normalization.**

a) Distribution of the window mean coverage before normalization. Inset, the summary statistics of the entire distribution (boxed) and of only those windows with mean coverage lower than 20 $\times$ . b) Distribution of window mean coverage after normalization and its summary statistics.

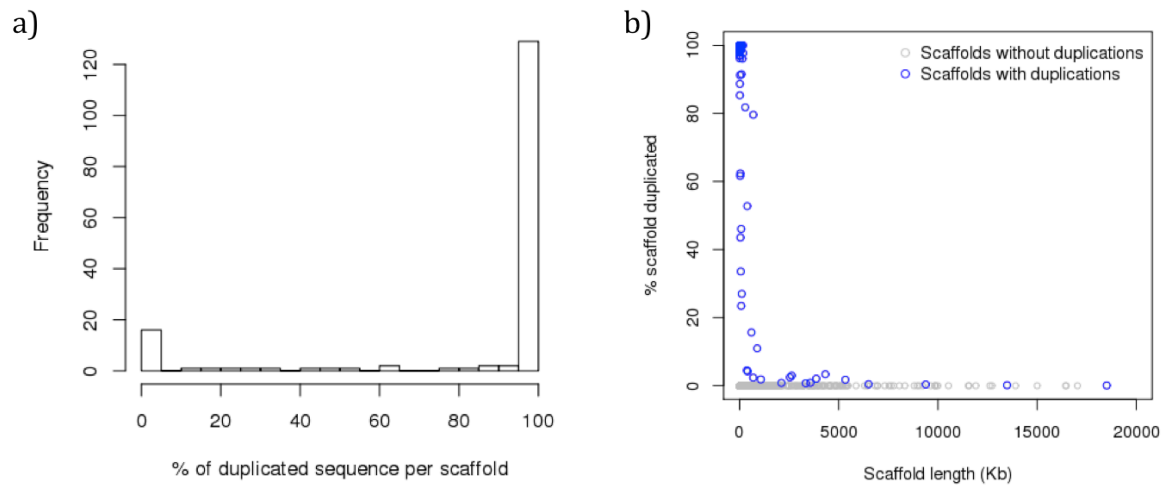

**Supplementary Figure I.7 | Distribution of duplicated sequences across scaffolds.**

a) Distribution of the percentage of duplicated sequence per scaffold; b) scaffold length plotted against the percentage of scaffold sequence that is estimated as duplicated.

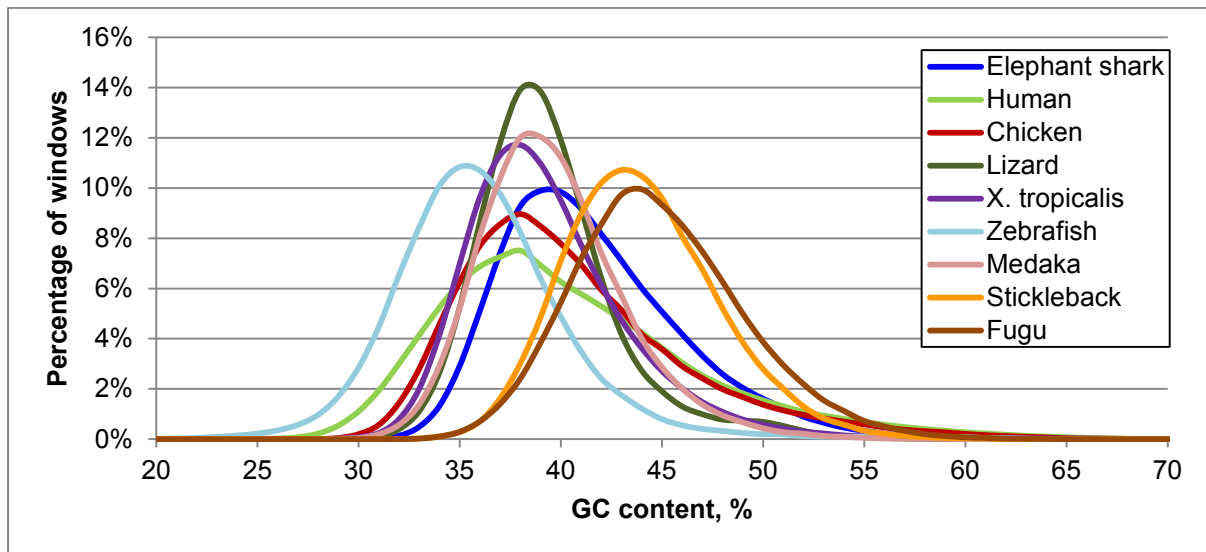

### Supplementary Figure II.1 | Distribution of GC content in vertebrate genomes.

The GC values of non-overlapping 3-kb windows were used. The windows were distributed into bins of 1% GC content.





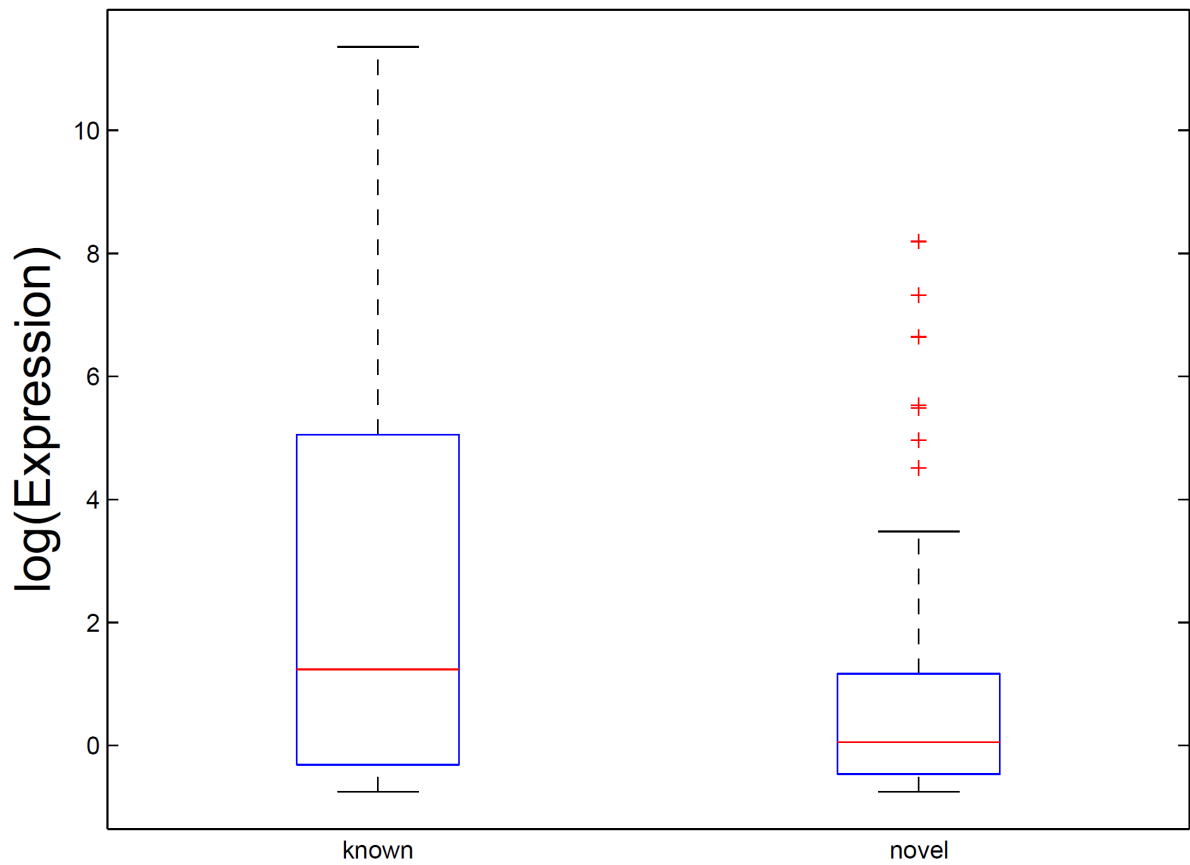

**Supplementary Figure III.2 | Boxplot of expression levels for known and novel *C. milii* miRNAs identified in this study.**

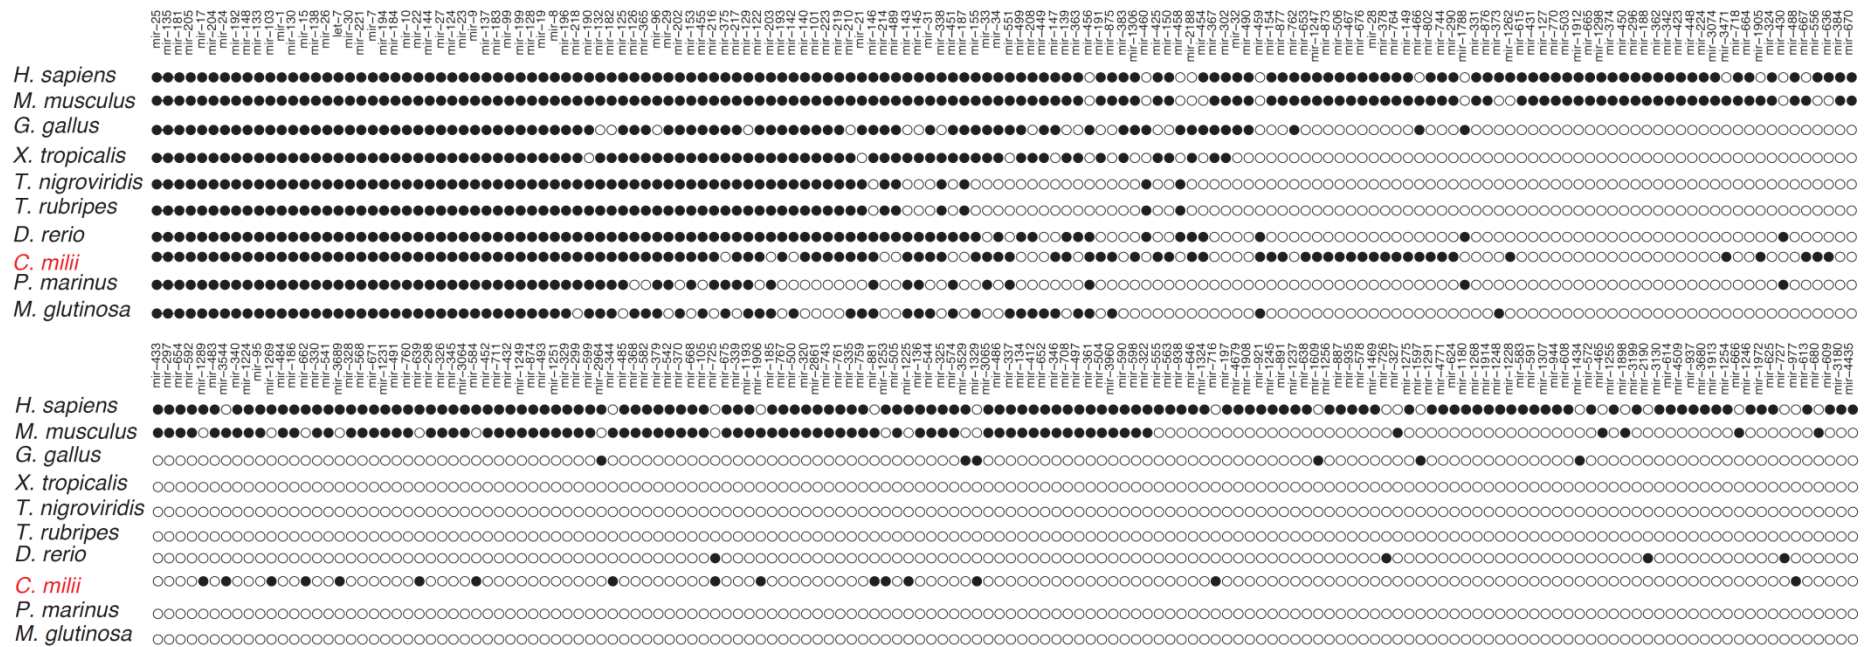

### Supplementary Figure III.3 | Distribution of miRNA families across vertebrate lineages.

The presence of a miRNA family is indicated by a filled circle. The data were collated from miRBase release 19 (*Homo sapiens*, *Mus musculus*, *Gallus gallus*, *Xenopus tropicalis*, *Tetraodon nigroviridis*, *Takifugu rubripes*, *Danio rerio*), this study (*Callorhinchus milii*) and Heimberg et al. (2010) (sea lamprey - *Petromyzon marinus* and Atlantic hagfish - *Myxine glutionsa*).

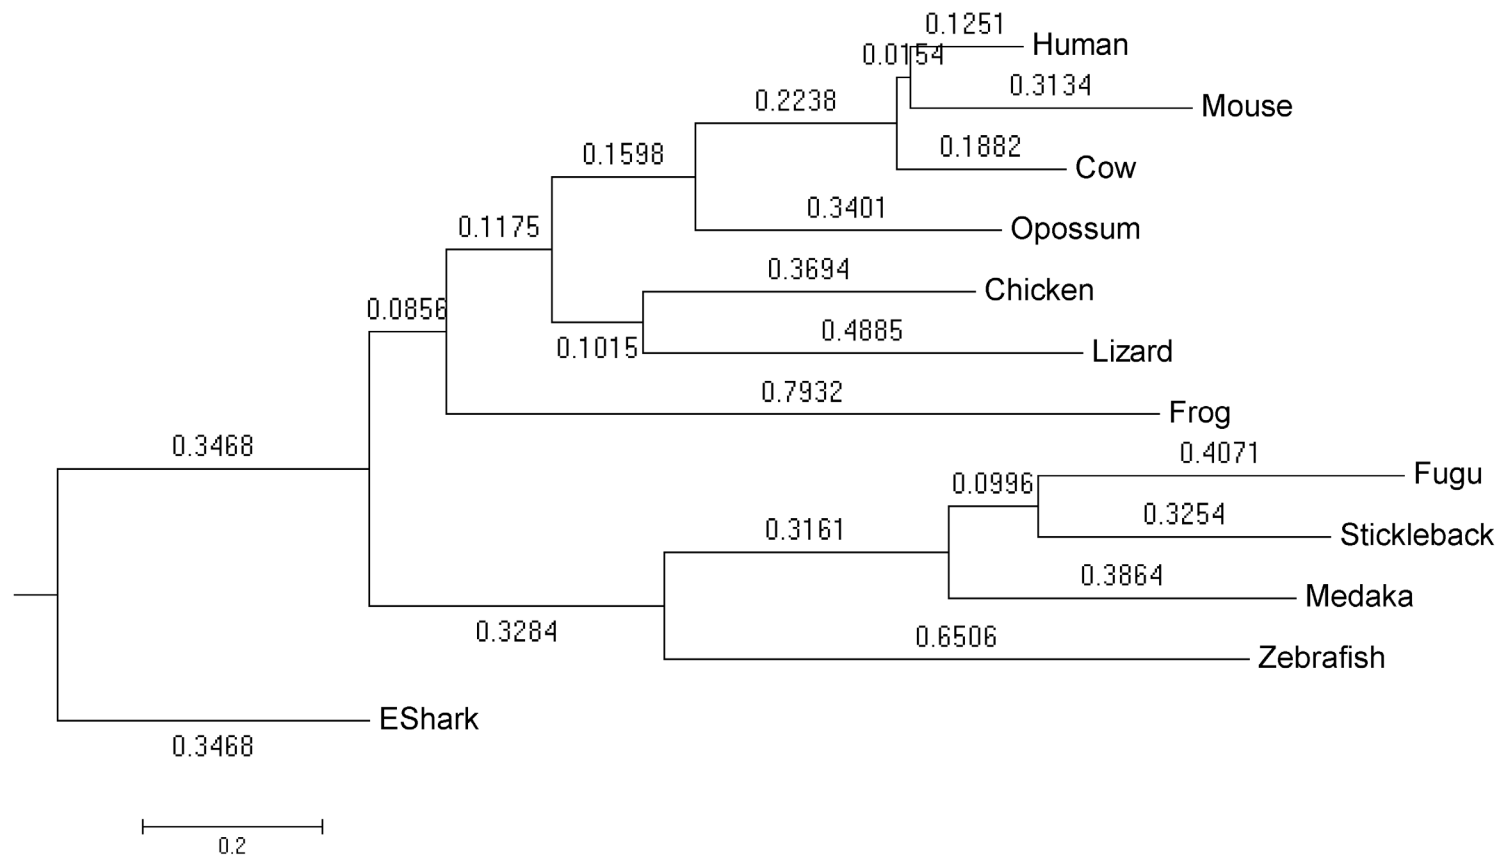

**Supplementary Figure IV.1 | A neutral tree of 12 vertebrate genomes.**

The tree was obtained from a multiple alignment of four-fold degenerate sites.

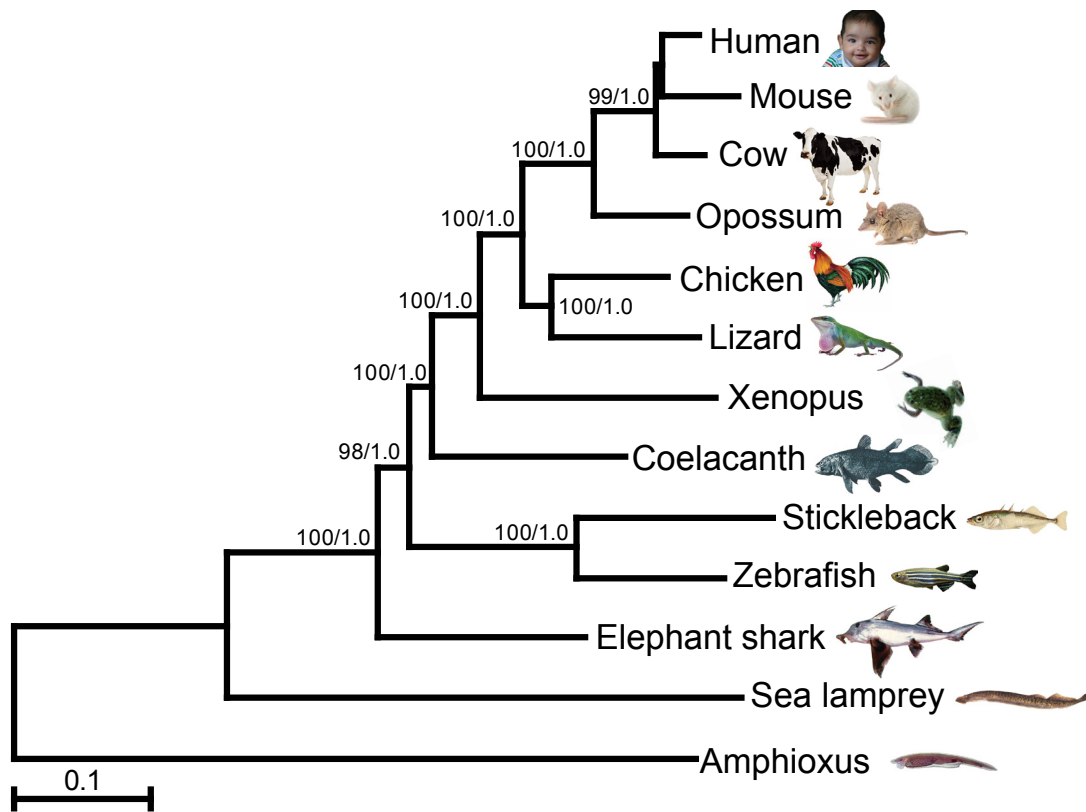

### Supplementary Figure V.1 | The phylogenetic position of *C. milii*.

The tree is based on Maximum Likelihood (ML) and Bayesian Inference (BI) using a concatenated alignment of 699 one-to-one core orthologs (237,907 amino acid positions) from 13 chordates. ML bootstrap percentage (left) and BI posterior probability (right) are indicated at the nodes. Constrained nodes have no ML or BI value. Sea lamprey is the closest outgroup to gnathostomes. The tree has been rooted by specifying amphioxus as the outgroup. The scale bar represents 0.1 substitutions per site.

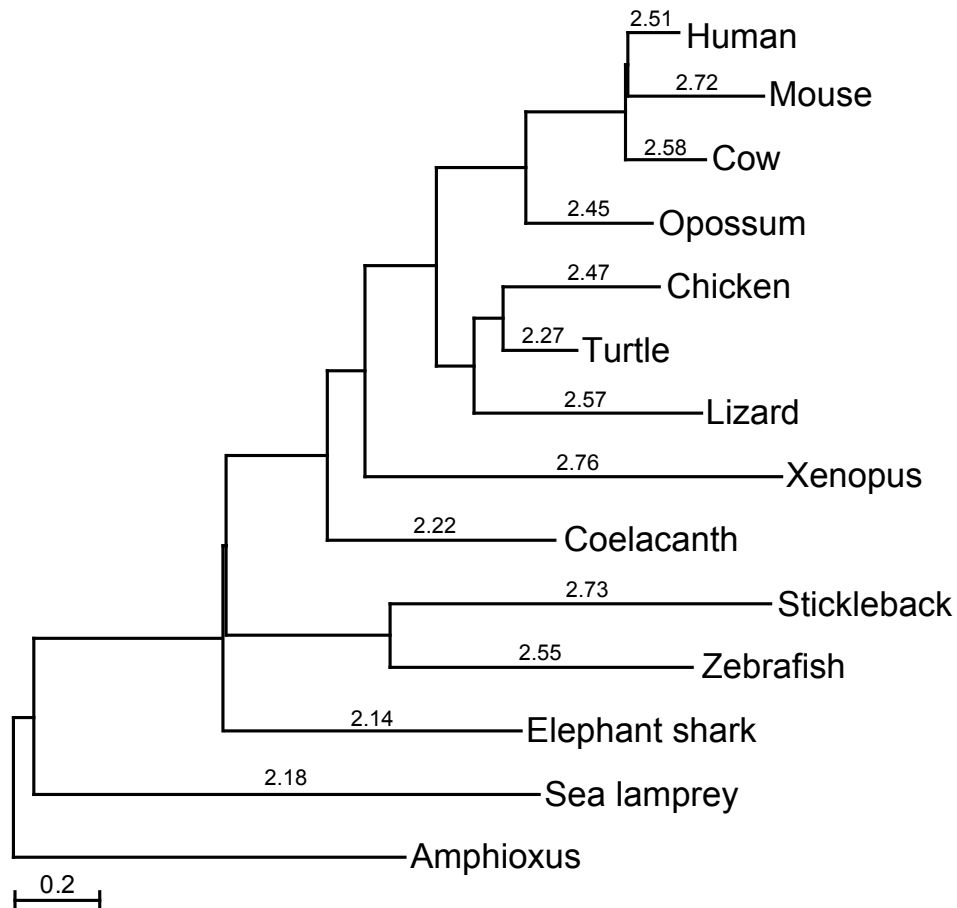

### Supplementary Figure VI.1 | *C. milii* genome is evolving slower than turtle genome.

A neutral tree of 14 chordates (including western painted turtle) based on four-fold degenerate (4D) sites suggests that *C. milii* possesses the slowest evolving vertebrate genome. 4D sites were extracted from the concatenated coding sequence alignment of 399 strict one-to-one core orthologs. Pairwise distances to amphioxus are shown for each species above their respective branches.

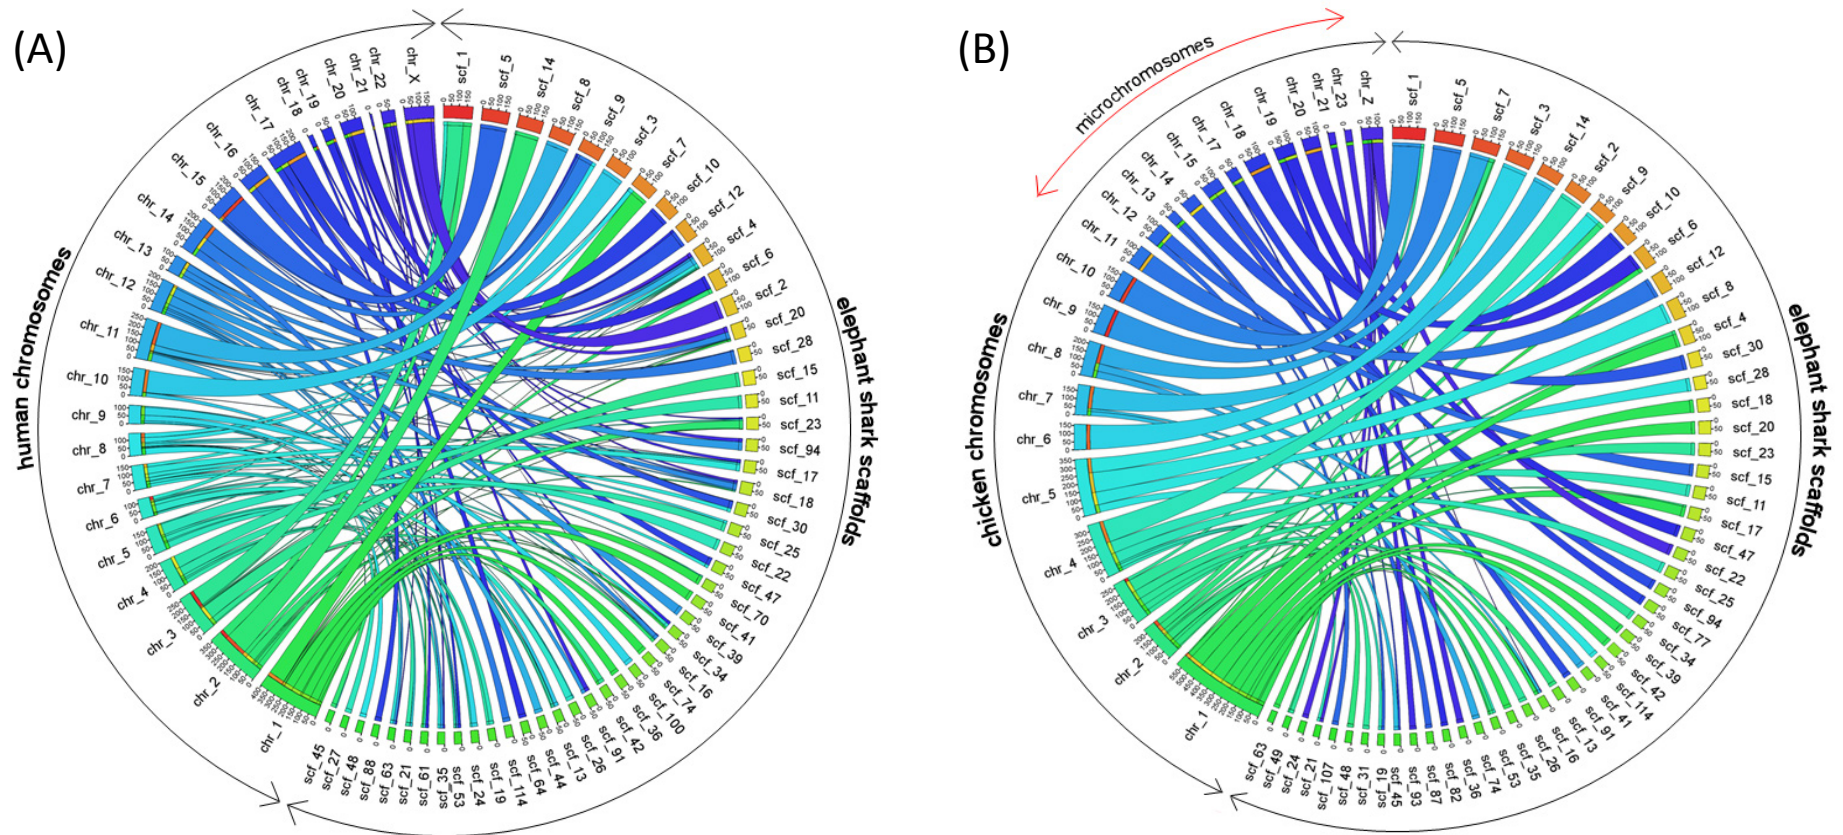

**Supplementary Figure VIII.1 | Circos plot of the top 50 *C. milii* scaffolds syntenic to human and chicken chromosomes.**

The number of syntenic genes between the top 50 *C. milii* scaffolds, and human (A) or chicken (B) chromosomes are illustrated using Circos v0.56 (Krzywinski et al. 2009). The width of ribbons linking the chromosomes of human and chicken to the *C. milii* scaffolds is proportional to the number of shared syntenic genes.

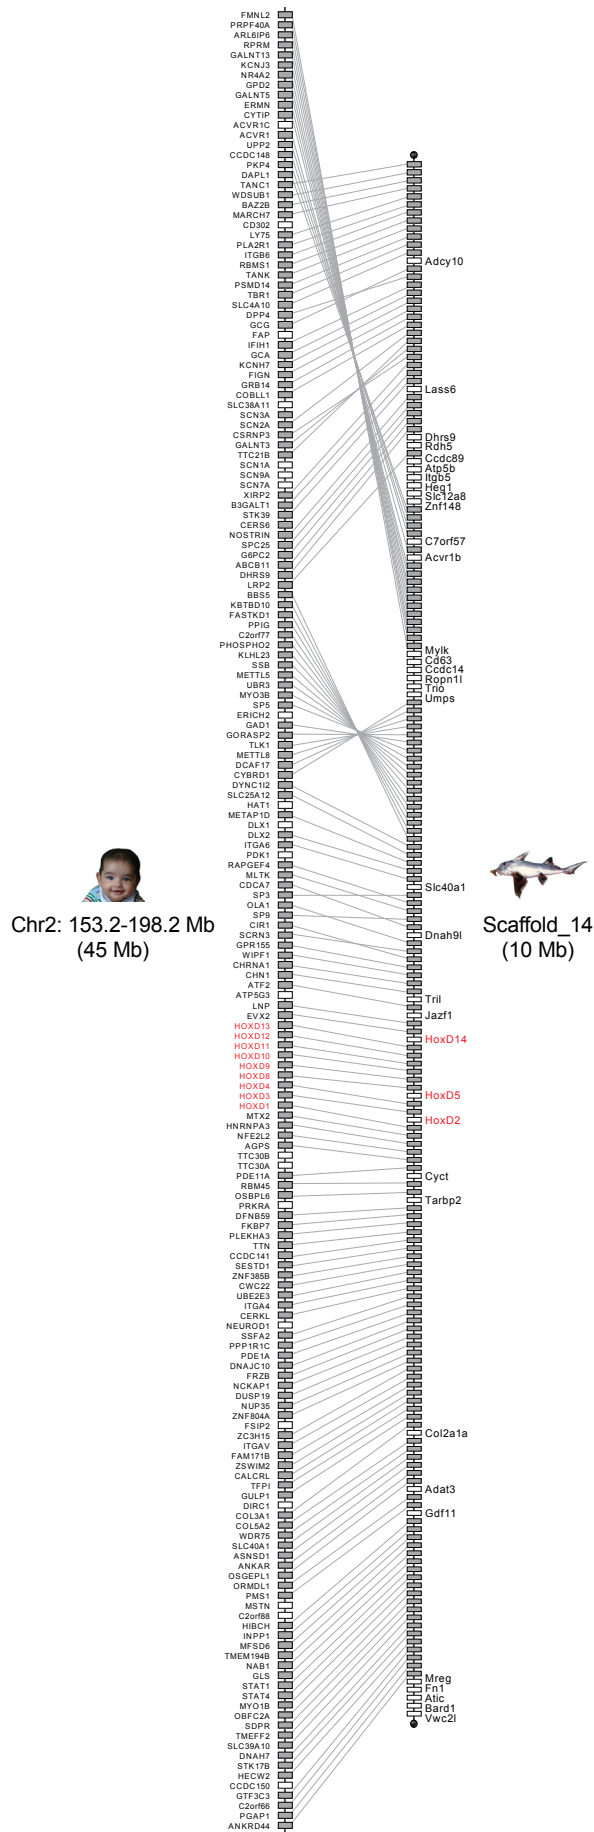

**Supplementary Figure VIII.2 | An extensively conserved syntenic block in the *C. milii* and human genomes.**

Genes are shown as rectangles and syntenic genes are colored grey. Scaffold ends are marked by grey circles. Synteny of 148 genes on *C. milii* scaffold\_14 (10 Mb) is highly conserved in the human Chr\_2q23.3 to 2q33.1 (45 Mb) encompassing the HOXD gene cluster (shown in red). In the *C. milii* locus, only genes that are not present in the human locus are labelled.



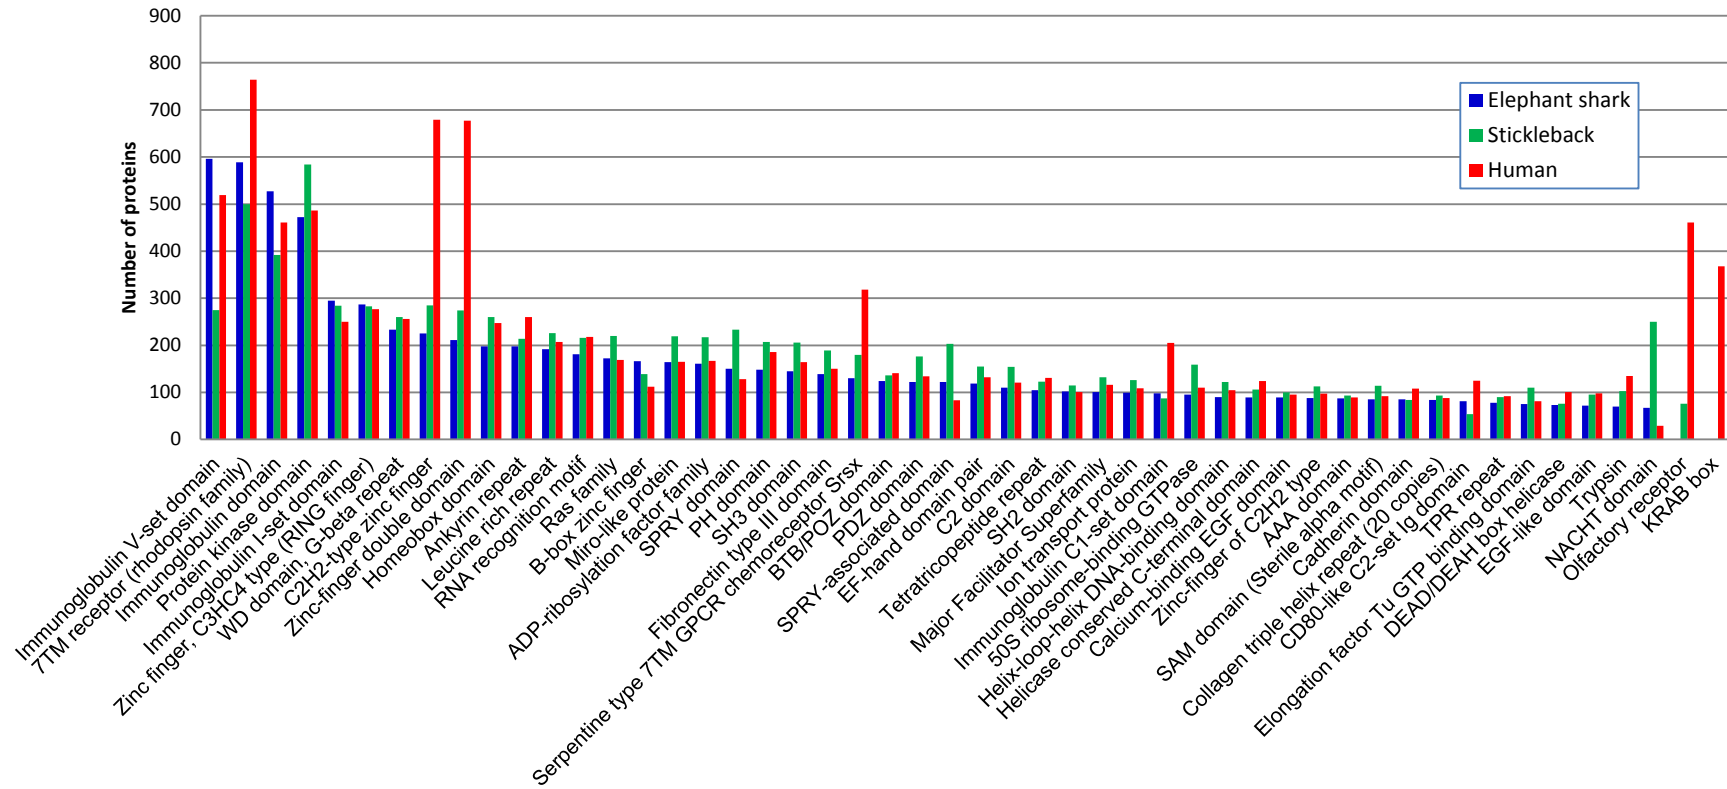

**Supplementary Figure IX.1 | Top 50 protein domains (PFAM) in *C. milii*, stickleback and human proteomes**

Protein domains are sorted by decreasing number of proteins in *C. milii*.

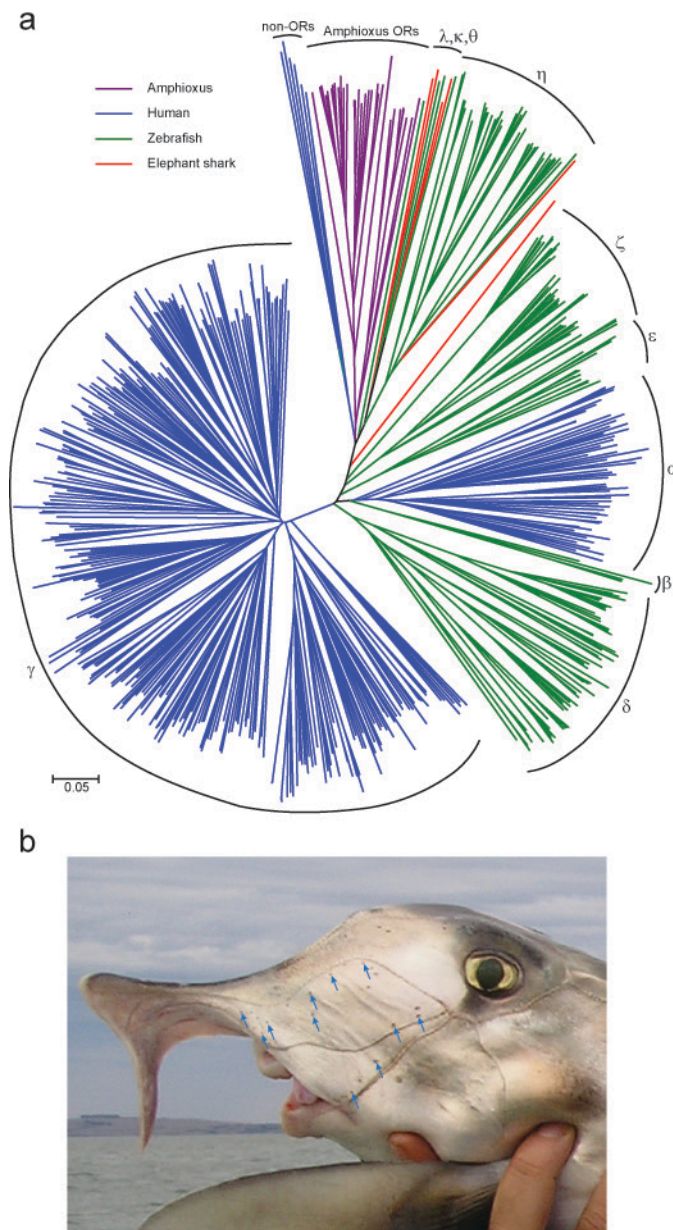

**Supplementary Figure IX.2 | Neighbor joining tree of OR-like genes from *C. milii*, human, zebrafish and amphioxus.**

(a) Neighbour joining tree of OR-like genes. A total of 589 protein sequences including 6 non-OR GPCR (outgroup) sequences were aligned using MAFFT version 6.864b (Kato et al. 2002) and trimmed using GBlocks (Castresana 2000). A neighbor-joining tree was generated using ClustalW. Sequences used as outgroup were: human alpha-1B adrenergic receptor (NP\_000670.1), human muscarinic acetylcholine receptor M1 (NP\_000729.2), human somatostatin receptor type 5 (NP\_001044.1), human chemokine-binding protein 2

(NP\_001287.2), human G-protein coupled receptor 35 isoform a (NP\_005292.2), and human G-protein coupled receptor 132 (NP\_037477.1). Different groups of ORs are shown in different colours. Bootstrap support percentages  $\geq 50$  are shown at the main nodes of the tree. The six elephant shark OR-like sequences are labeled. All non-elephant shark sequences used in the analysis were extracted from the datasets of a previous study (Niimura 2009). **(b)** *C. milii* snout showing the distribution of ampullae of Leorenzini (arrows indicate ampullary pores).

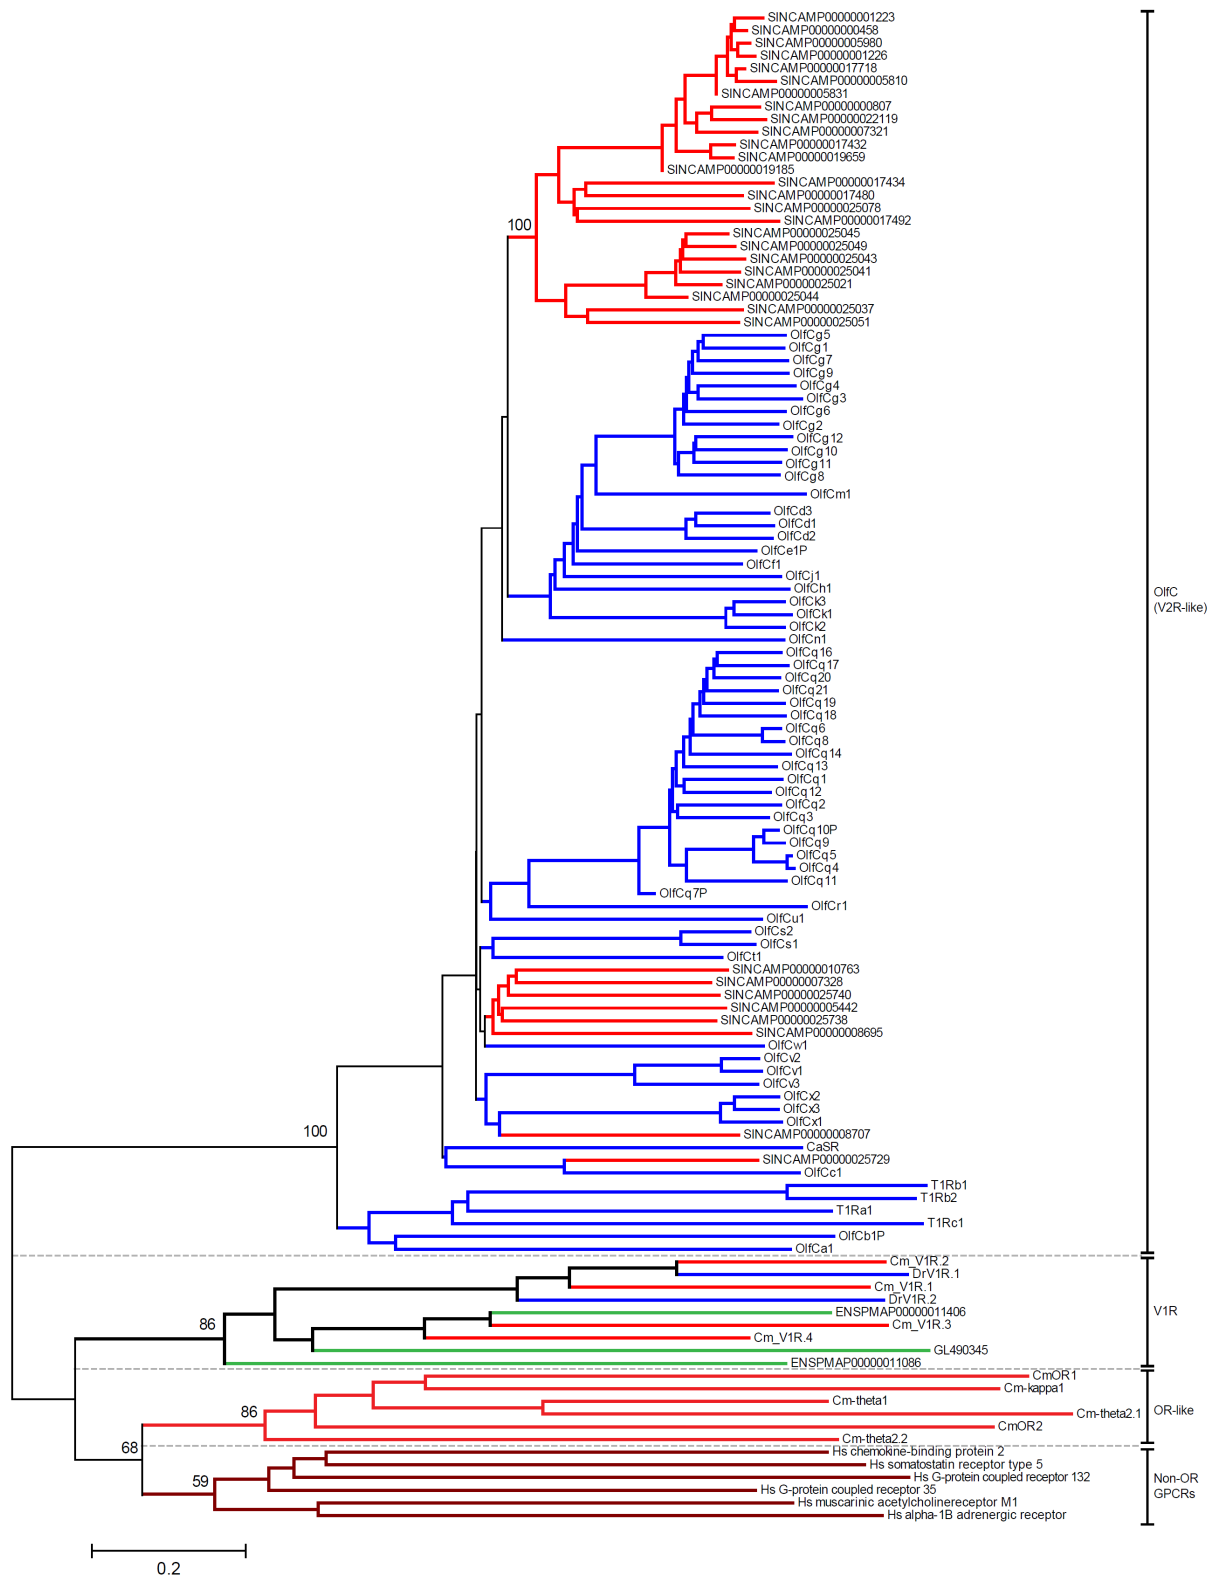

### Supplementary Figure IX.3 | Neighbor joining tree of V1R-like and V2R-like (*OlfC*) genes from *C. milii*, zebrafish and lamprey.

A total of 118 protein sequences including six elephant shark OR-like sequences and six non-OR GPCRs were aligned using MAFFT version 6.864b (Kato et al. 2002). A neighbor-joining tree was generated using MEGA5 (Tamura et al. 2011) with Poisson correction and

1000 bootstrap replicates. Non-OR GPCR sequences used as outgroups were: human alpha-1B adrenergic receptor (NP\_000670.1), human muscarinic acetylcholine receptor M1 (NP\_000729.2), human somatostatin receptor type 5 (NP\_001044.1), human chemokine-binding protein 2 (NP\_001287.2), human G-protein coupled receptor 35 isoform a (NP\_005292.2), and human G-protein coupled receptor 132 (NP\_037477.1). Bootstrap support percentages  $\geq 50$  are shown at the main nodes of the tree. Red, blue and green branches denote *C. milii*, zebrafish and sea lamprey sequences respectively. Zebrafish V1R sequences were retrieved from GenBank whereas V2R sequences were obtained from (Alioto and Ngai 2006). Sea lamprey V2R-like sequences from (Grus and Zhang 2009) were checked against the *Petromyzon marinus*\_7.0 assembly ([www.ensembl.org](http://www.ensembl.org)) to obtain the Ensembl IDs/scaffold number. Non-OR GPCRs are from (Niimura 2009). Brown branches represent human non-OR GPCR sequences.

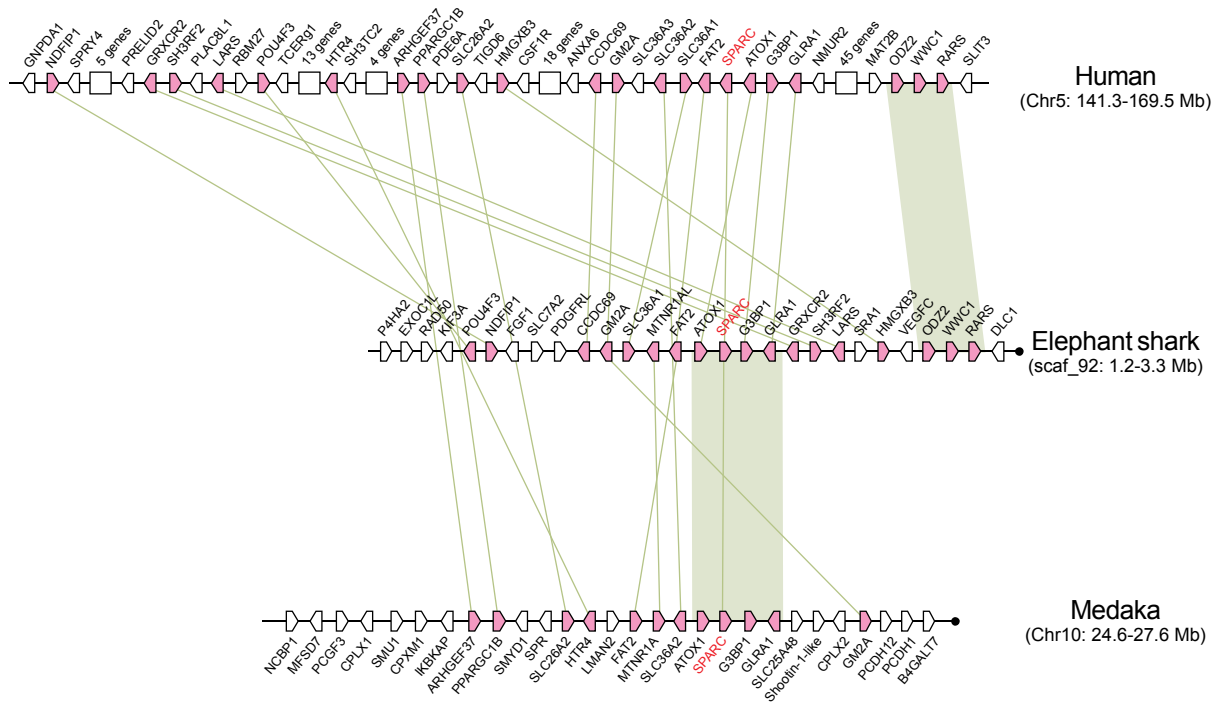

### Supplementary Figure X.1 | The *Sparc* gene locus in human, elephant shark (*C. milii*) and medaka.

Genes are represented as block arrows. Syntenic genes are colored. For clarity, clusters of selected non-syntenic genes are grouped and represented as rectangles. Not drawn to scale.



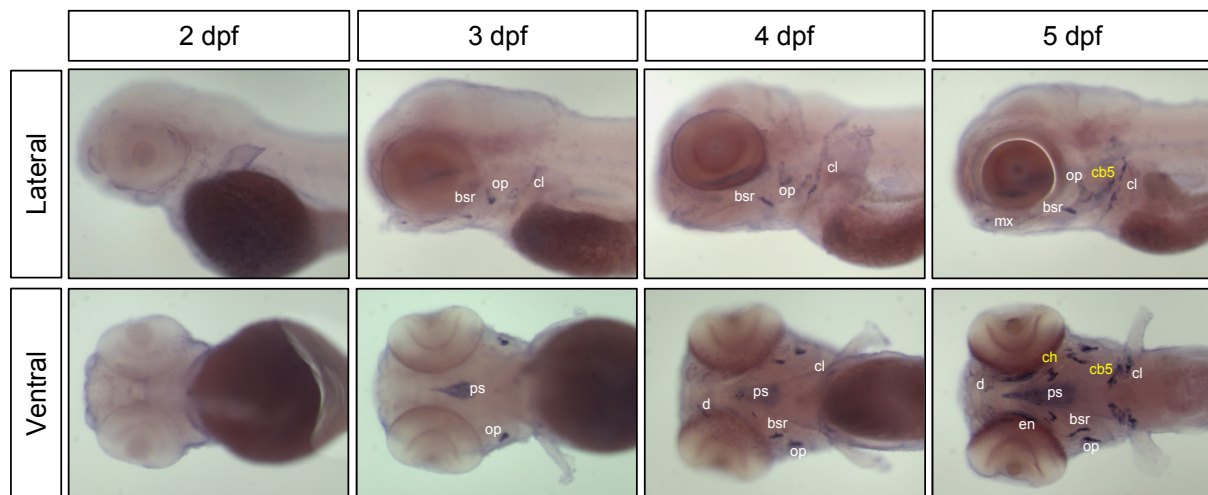

**Supplementary Figure X.3 | Zebrafish *spp1* is expressed from 2 dpf specifically in cells surrounding the bone matrix.**

Lateral and ventral views of 2 to 5 dpf embryos hybridized with *spp1* RNA probe. There was no expression at 1 dpf. Endochondral bones (ch, ceratohyal; cb5, ceratobranchial 5) are highlighted in yellow whereas dermal bones (bsr, branchiostegal ray; cl, cleithrum; d, dentary; en, entopterygoid; mx, maxilla; op, operculum; ps, parasphenoid) are highlighted in white.



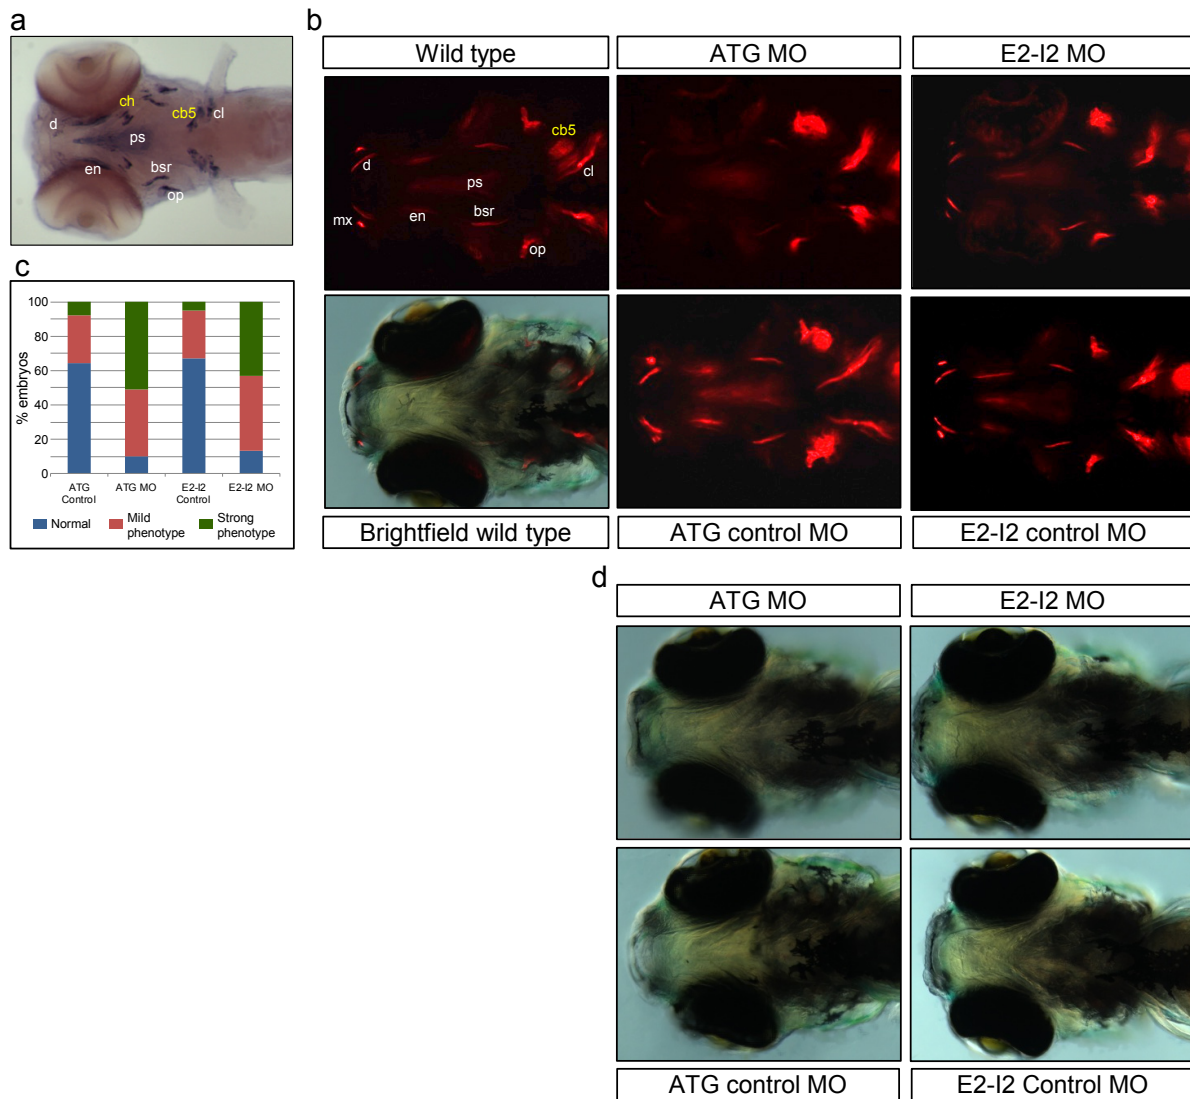

### Supplementary Figure X.4 | Reduction of bone deposition in *spp1* zebrafish morphants.

(a) *spp1* is specifically expressed in cells surrounding the bone matrix. Ventral view of a 5 dpf embryo hybridized with *spp1* RNA probe. Endochondral bones (ch, ceratohyal; cb5, ceratobranchial 5) are highlighted in yellow whereas dermal bones (bsr, branchiostegal ray; cl, cleithrum; d, dentary; en, entopterygoid; op, operculum; ps, parasphenoid) are highlighted in white. (b) Ventral views of 5 dpf wild type, ATG MO, ATG control MO, E2-I2 MO and E2-I2 control MO embryos. Embryos were stained with alizarin red to reveal sites of bone deposition and imaged under red fluorescence. For one wild type embryo (bottom left), a merged bright field image and red fluorescence signal is shown to simultaneously visualize anatomical structures and bone deposition. (c) Proportion of embryos showing normal phenotype (resembling wild type), ‘mild’ bone-phenotype and ‘strong’ bone-phenotype (the latter showing the most reduction of bones). ATG MO and E2-I2 MO morphants show a significantly higher proportion of strong bone-phenotype ( $p < 0.01$ , Fisher’s exact test)

compared to their respective controls. (d) Bright field images of embryos shown in panel (b) showing normal growth of morphant embryos.



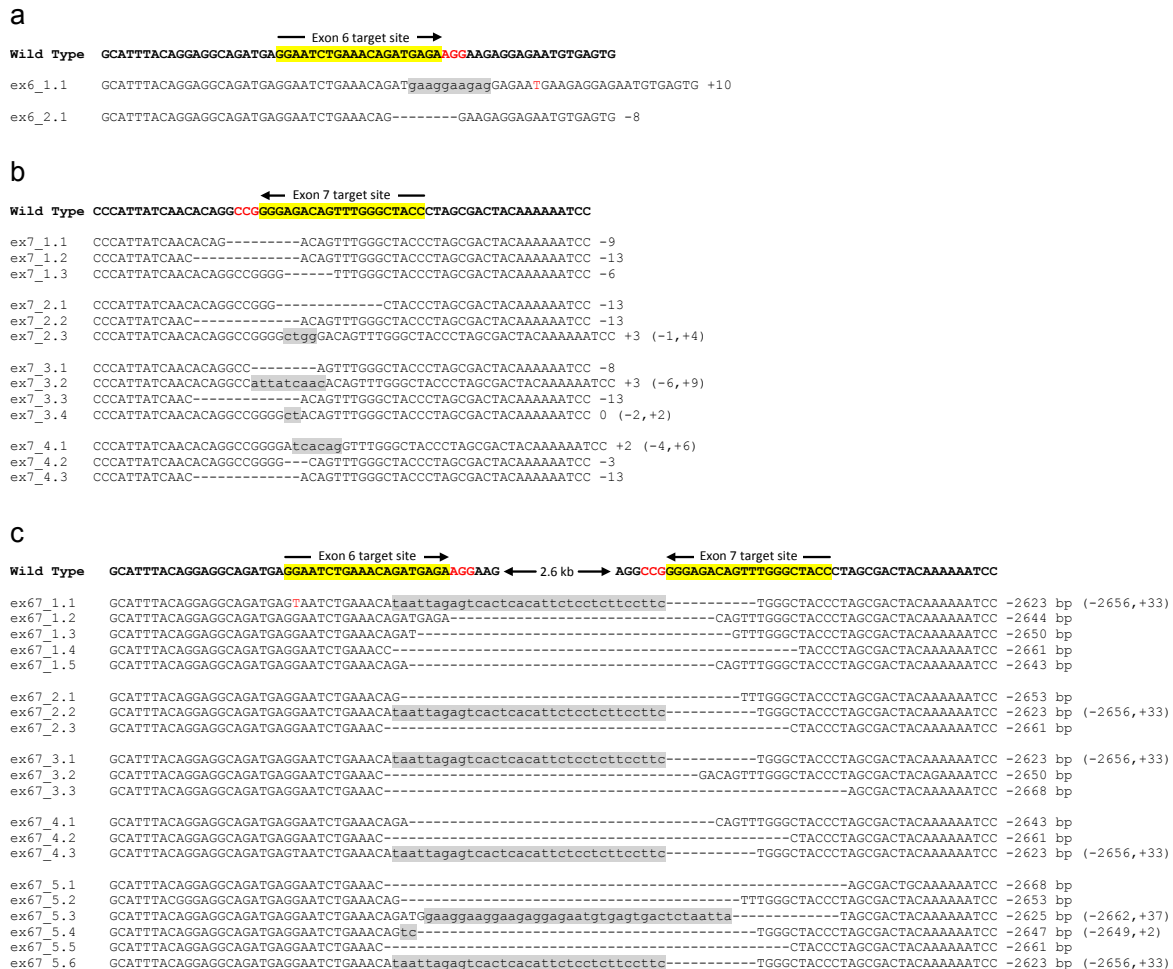

## Supplementary Figure X.6 | Targeted indel mutations induced by sgRNA:Cas9 mRNA in the zebrafish *spp1*.

Either exon 6 (a), exon 7 (b) or both exons (c) were targeted. Target sequences of embryos were PCR amplified, cloned and sequenced. Allele sequences of representative embryos with indel mutations are shown. Wild type alleles are not shown. The wild type reference sequence is shown at the top with the target site highlighted in yellow and protospacer adjacent motif (PAM) sequence highlighted in red. Deletions are shown as dashes, and insertions as lower case letters highlighted in grey. The net change in the length caused by each indel mutation is shown to the right of the sequence (+, insertion; -, deletion). In general, the strength of the phenotype seems to be related more to the extent of somatic chimaerism rather than to the type of indels.

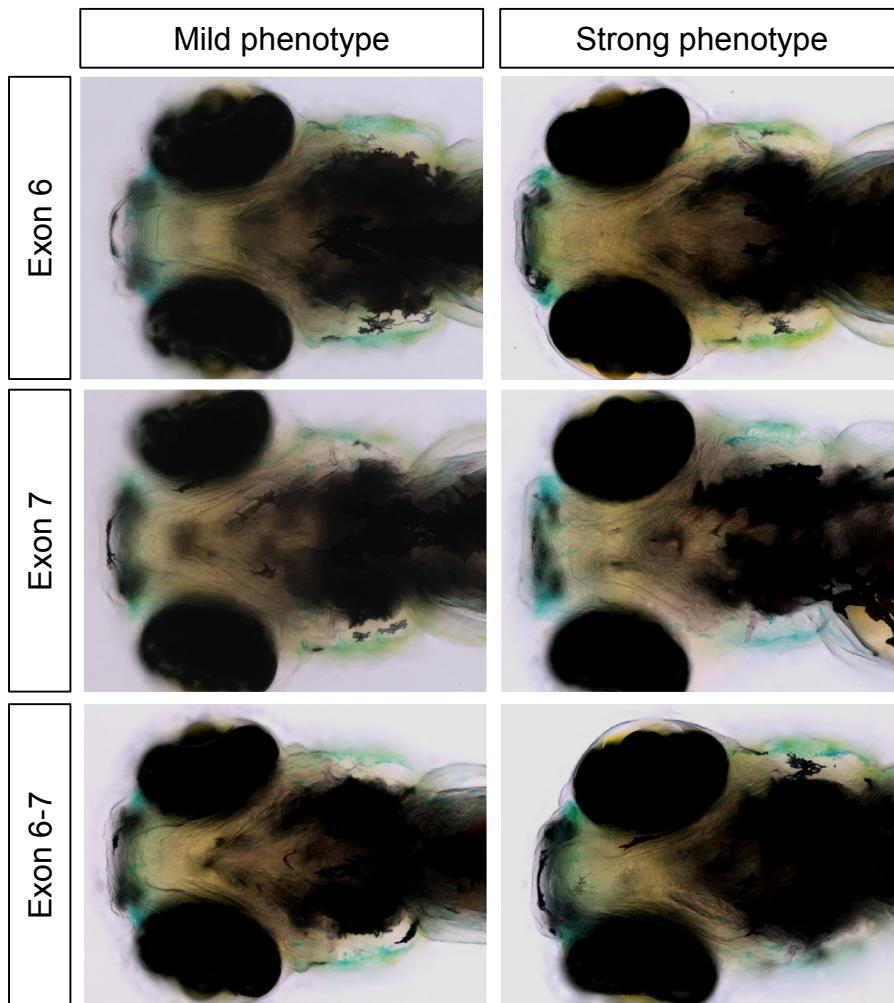

**Supplementary Figure X.7 | Brightfield images of embryos shown in Fig. 4d.**

Embryos injected with Cas9 mRNA + various sgRNA showed an overall growth comparable to wild type.

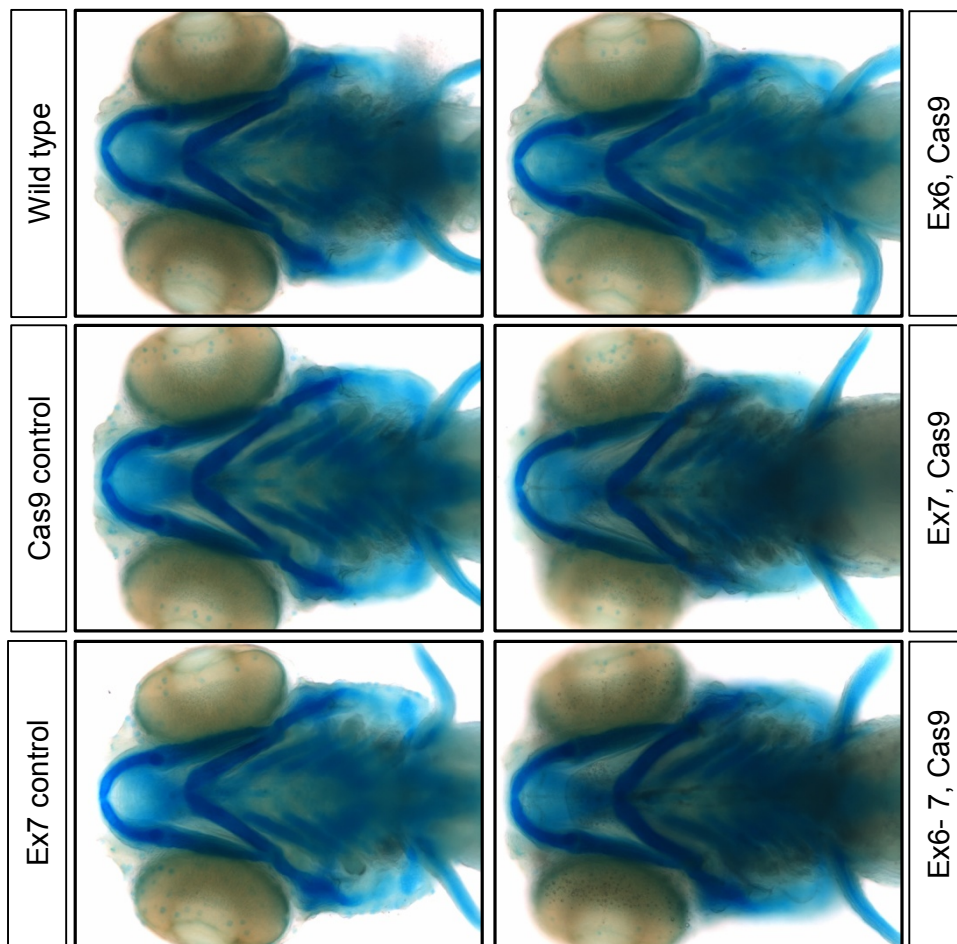

**Supplementary Figure X.8 | Alcian blue staining of embryos injected with Cas9 mRNA and various sgRNAs.**

Although bone formation was reduced in embryos treated with Cas9 mRNA + sgRNAs, the cartilage development was unaffected.

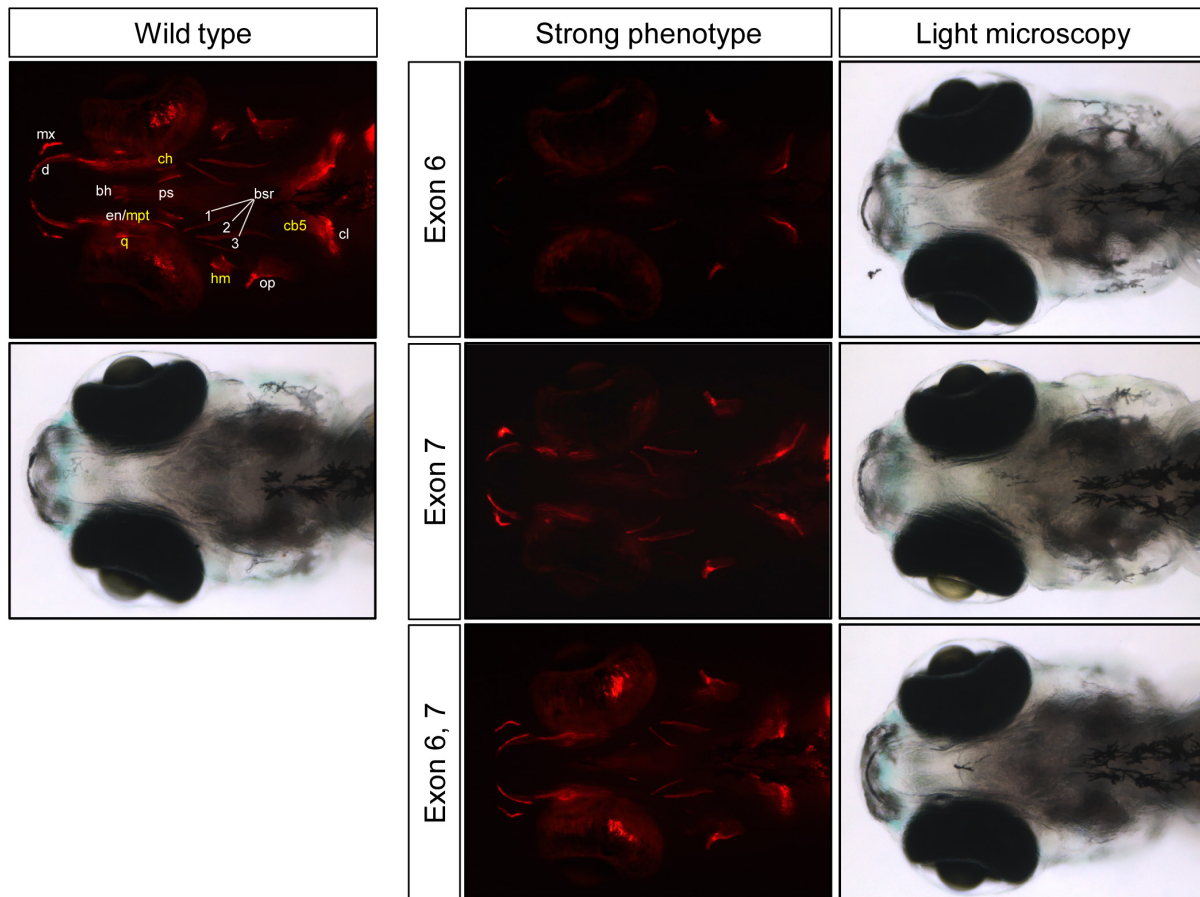

**Supplementary Figure X.9 | Targeted mutagenesis of zebrafish *spp1* by sgRNA:Cas9 results in reduced bone formation in 15 dpf embryos.**

Left panel: ventral view of a 15 dpf wild type embryo stained with Alizarin red to reveal sites of bone deposition (red fluorescence). Its light microscopy image is given below.

Endochondral bones (cb5, ceratobranchial 5; ch, ceratohyal; hm, hyomandibula; mpt, metapterygoid; q, quadrate) are highlighted in yellow whereas dermal bones (bh, basihyal; bsr, branchiostegal ray; cl, cleithrum; d, dentary; en, entopterygoid; mx, maxilla; op, operculum; ps, parasphenoid) are highlighted in white. Entopterygoid (en) and metapterygoid (mpt) are fused and hence cannot be readily distinguished. However, both are affected in *spp1* mutants shown in the right panel. Right panel: ventral views of 15 dpf embryos injected with *Cas9* mRNA together with single guide RNA (sgRNA) targeting *spp1* exon 6, exon 7 or both exons. The ‘strong’ bone-reduction phenotype embryos are shown (stained with Alizarin red). Light microscopy images of the mutants show normal development of the embryos.

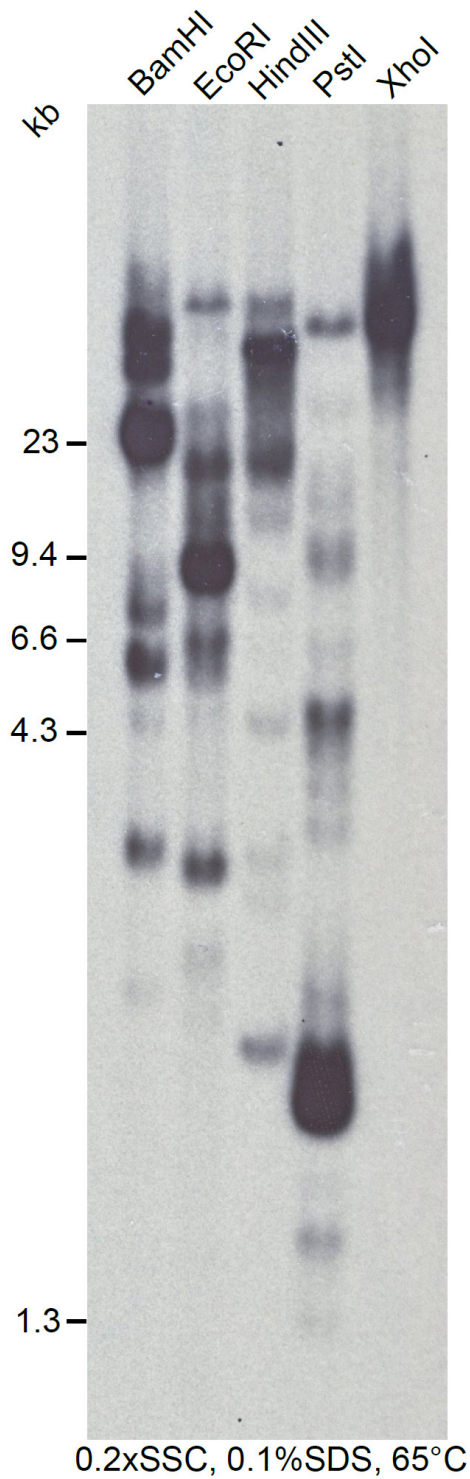

**Supplementary Figure XI.1 | Multiple IgM genes in the genome of *C. milii*.**

Sothern blot of genomic DNA of *C. milii* digested with the indicated restriction enzymes and hybridized with an *IgM* probe using the indicated hybridization conditions.



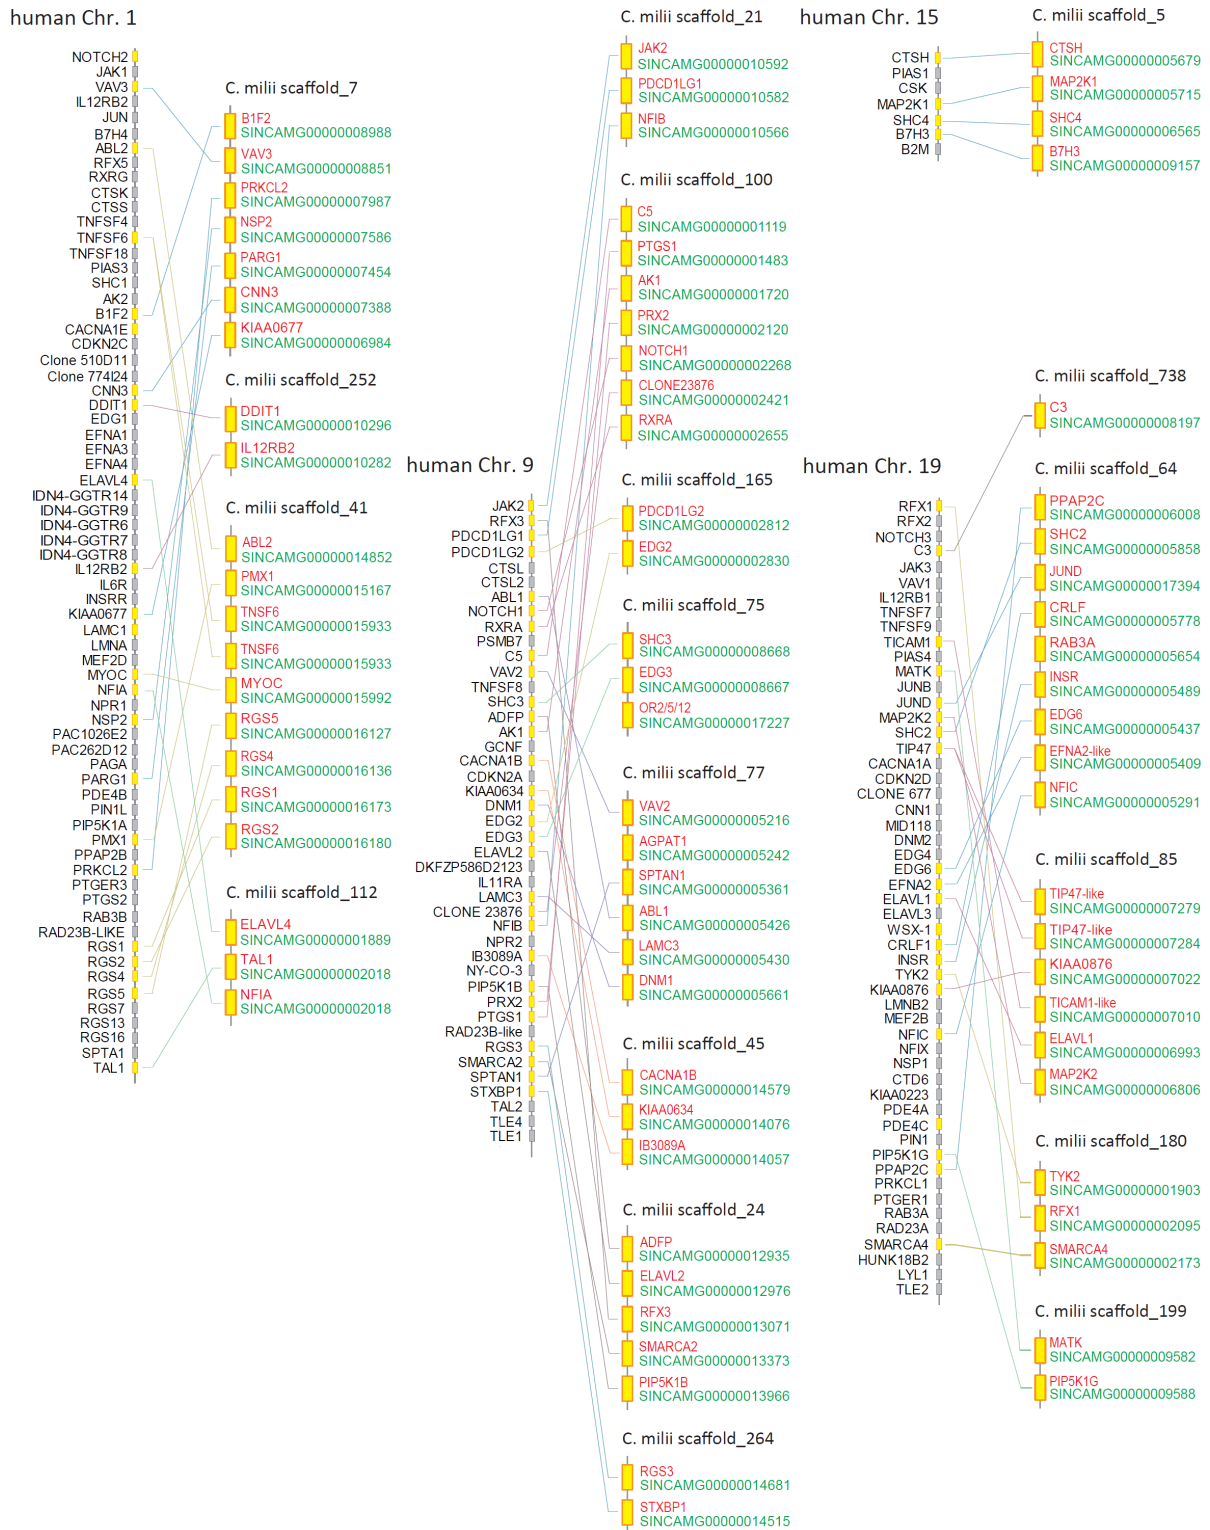

### Supplementary Figure XI.2 | MHC paralogous groups in *H. sapiens* and *C. milii*.

The four paralogous human chromosomes are indicated and aligned with the presumptive *C. milii* counterparts.

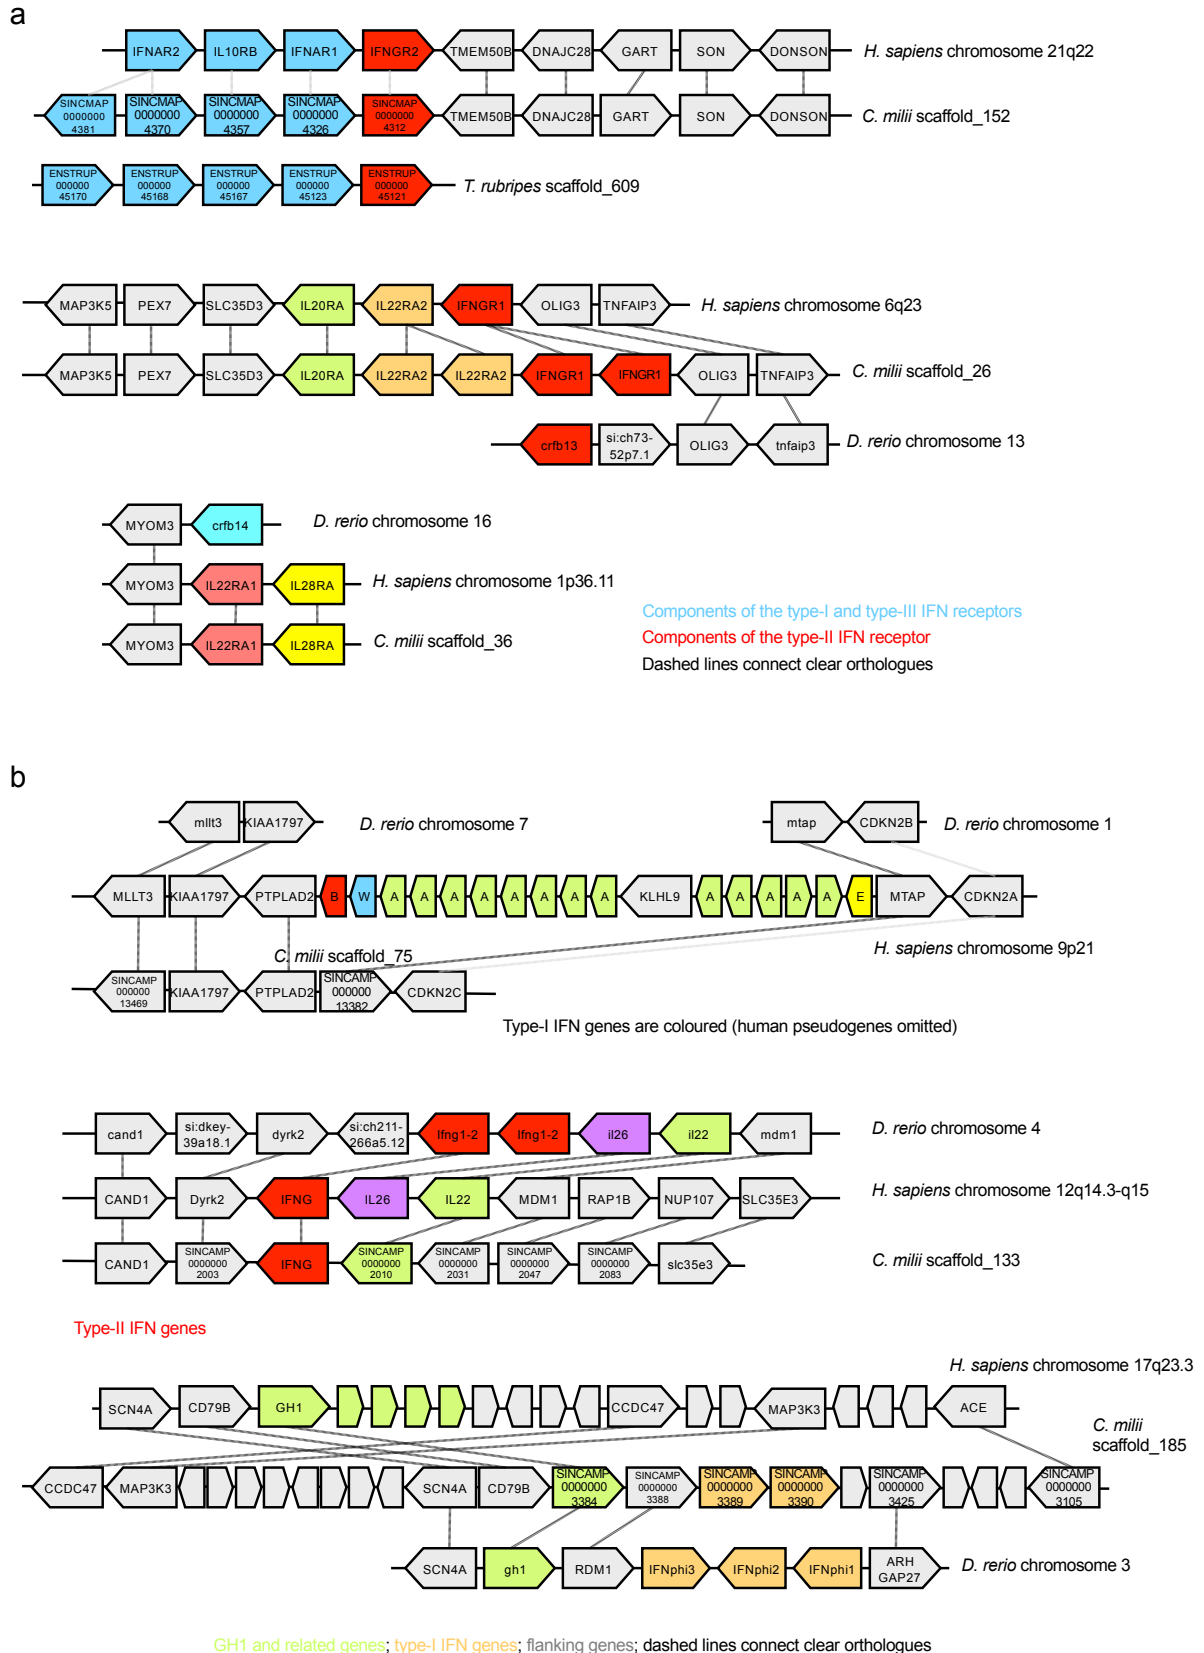

### Supplementary Figure XI.3 | Chromosomal organization of interferon receptor and interferon genes in vertebrate genomes.

**a**, Receptor genes. Species and chromosomal locations are indicated. **b**, Ligand genes.

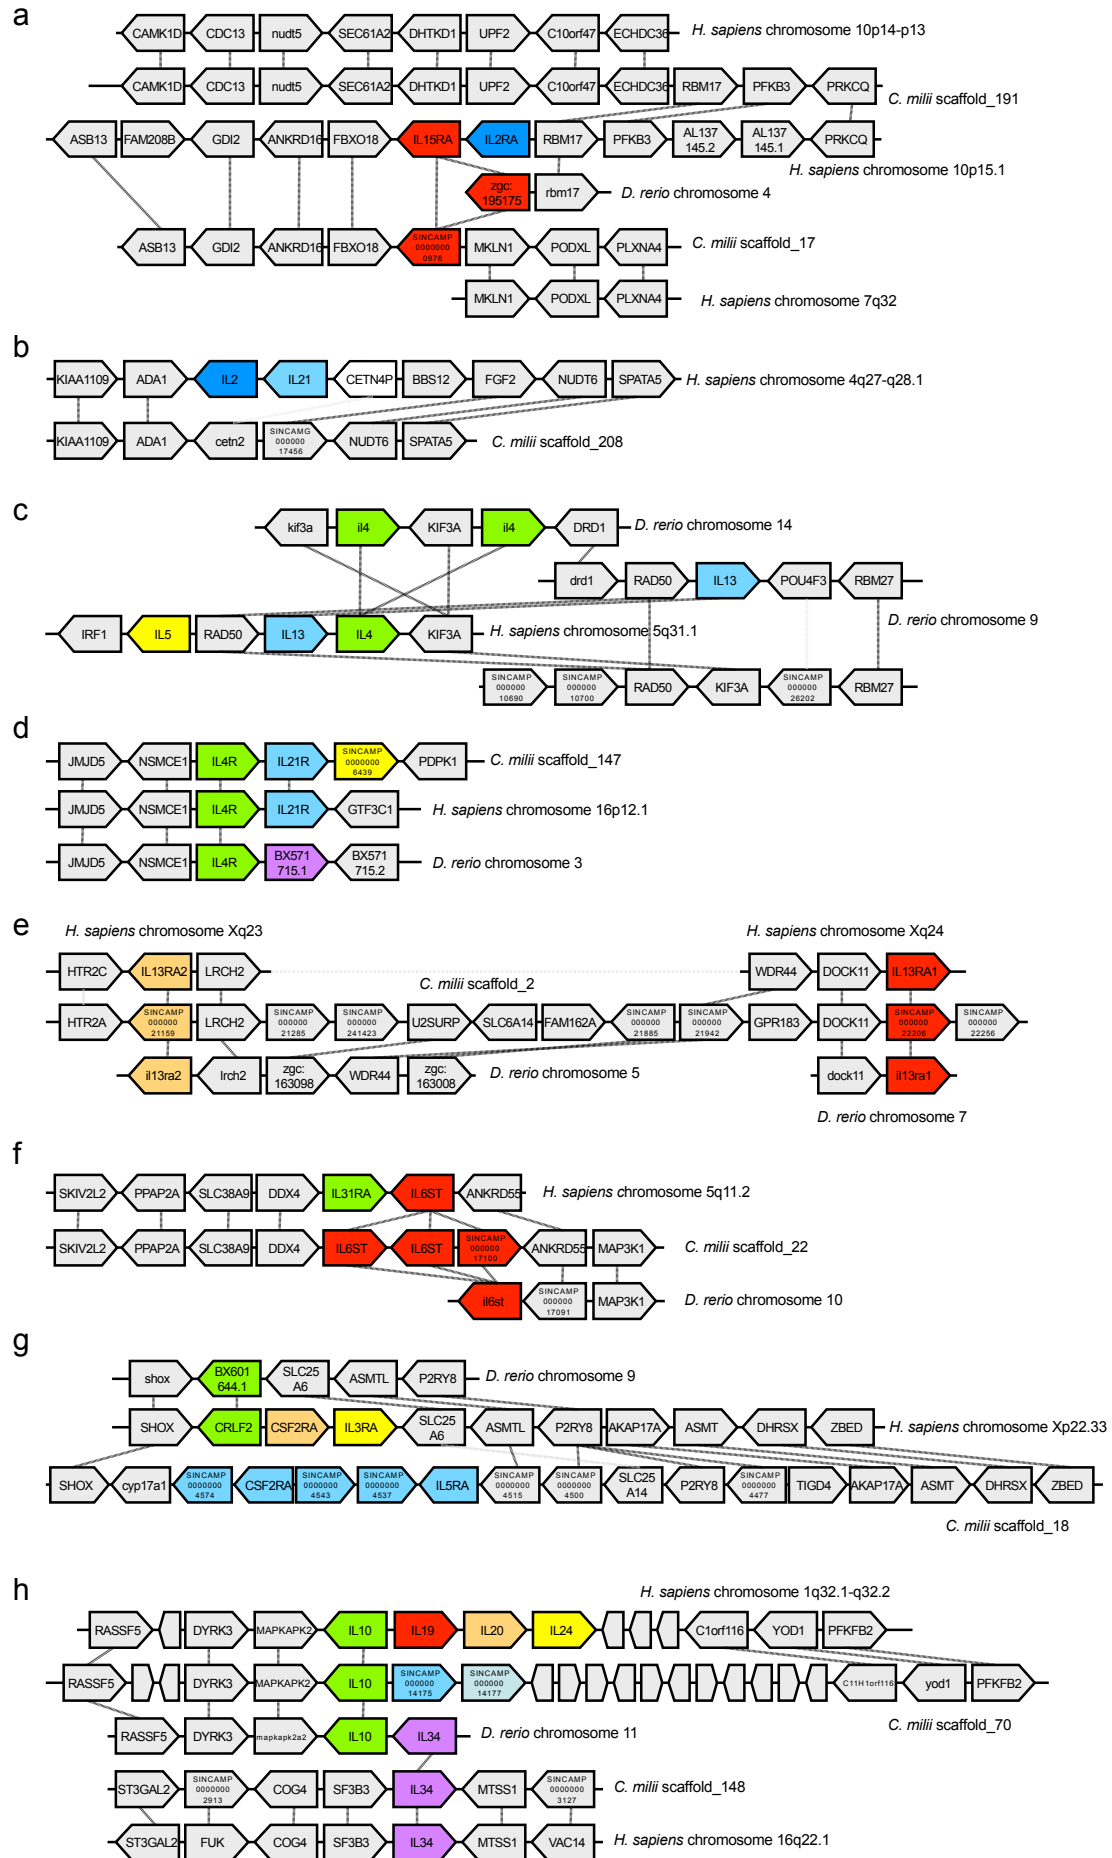

**Supplementary Figure XI.4 | Chromosomal organization of interleukin receptor and interleukin genes in vertebrate genomes.**

Dashed lines connect orthologues.

```

#          ***          *          #
Hs NMRPPFTYATLIRMAILEAPEKQRTLNEIYWFTRMFAPFRNHEATWKNAIRHNLSLHKCFVRVESEKGAVWTVDELEFRKRR
Dr .....SM.....KSL...L..K...Q...SM.FY..HNT.....V.....GR..S.....E..LRRK
Cm .I.....A.....TS..M.....L...K.....YNT.....V.....NMR.A.....M..QRRK
Gc .V...L..A...T...DR..L.....Q...T...YNT.....V.....NV..S...N...ERR

```

**Supplementary Figure XI.5 | Protein sequence comparison of DNA binding domains of *Foxp3*-like genes.**

Hs, *Homo sapiens*; Dr, *Danio rerio*; Cm, *Callorhinchus milii*; Gc, *Ginglymostoma cirratum*.

Signature residues predicted to be involved in NFAT interaction (#) or to affect DNA binding (\*) are marked.



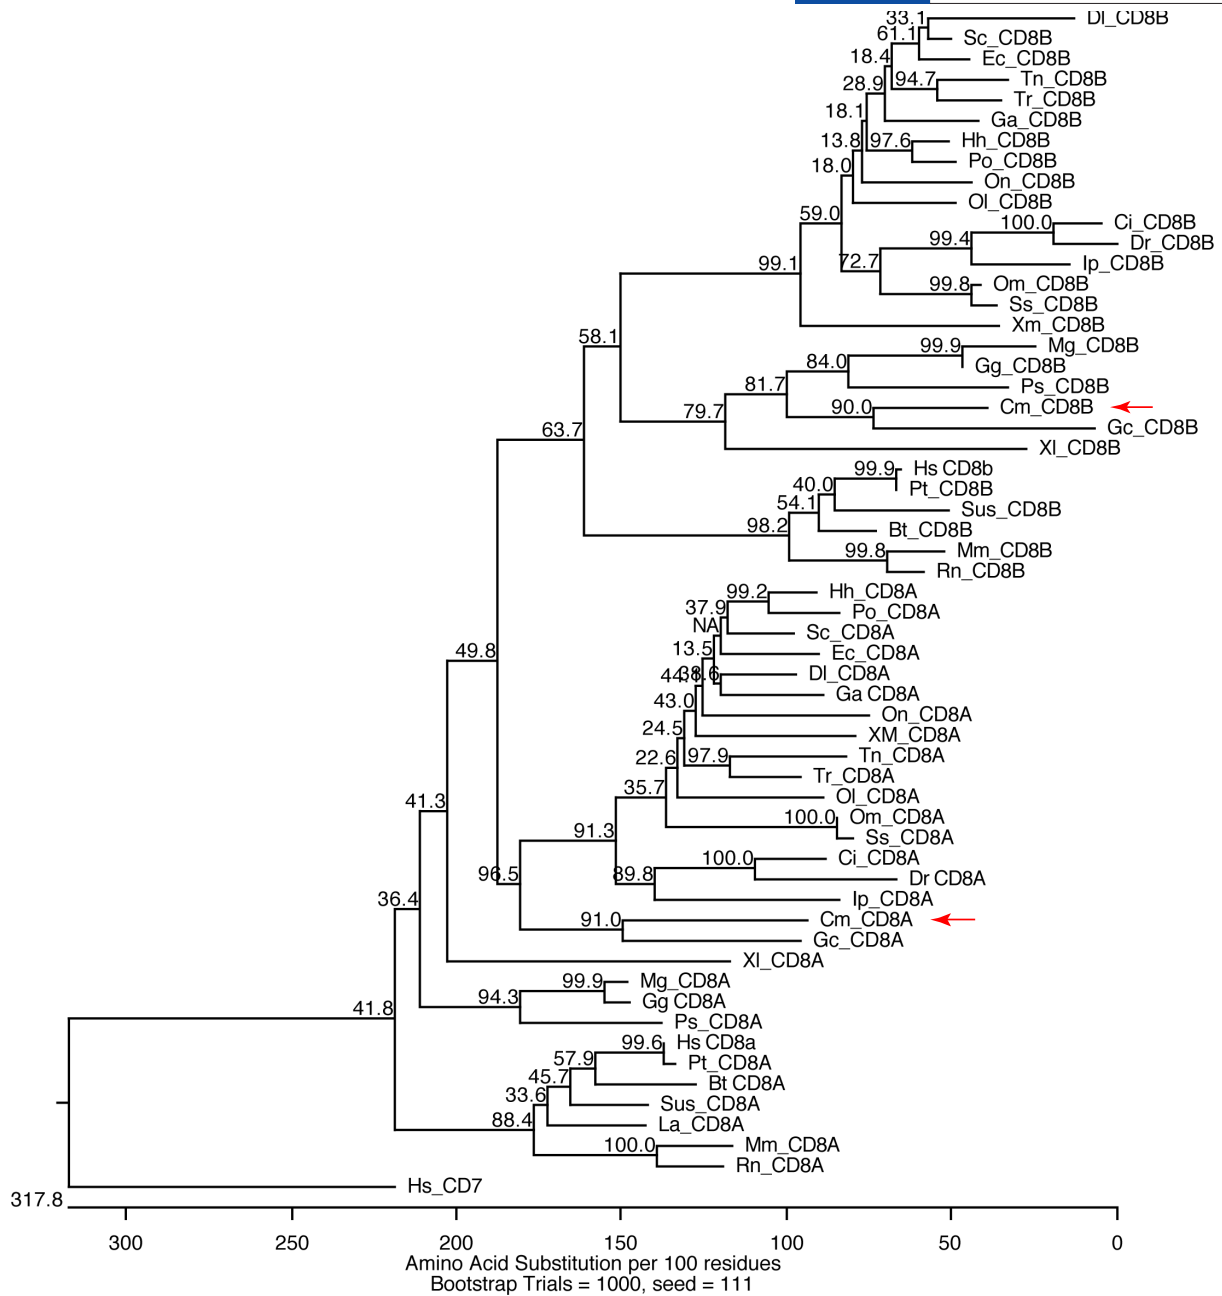

### Supplementary Figure XI.7 | Phylogenetic analysis of CD8-like proteins of vertebrates.

The sequences used for this analysis are listed in Supplementary Table IX.11. Arrows indicate the positions of *C. milii* CD8A and CD8B proteins.

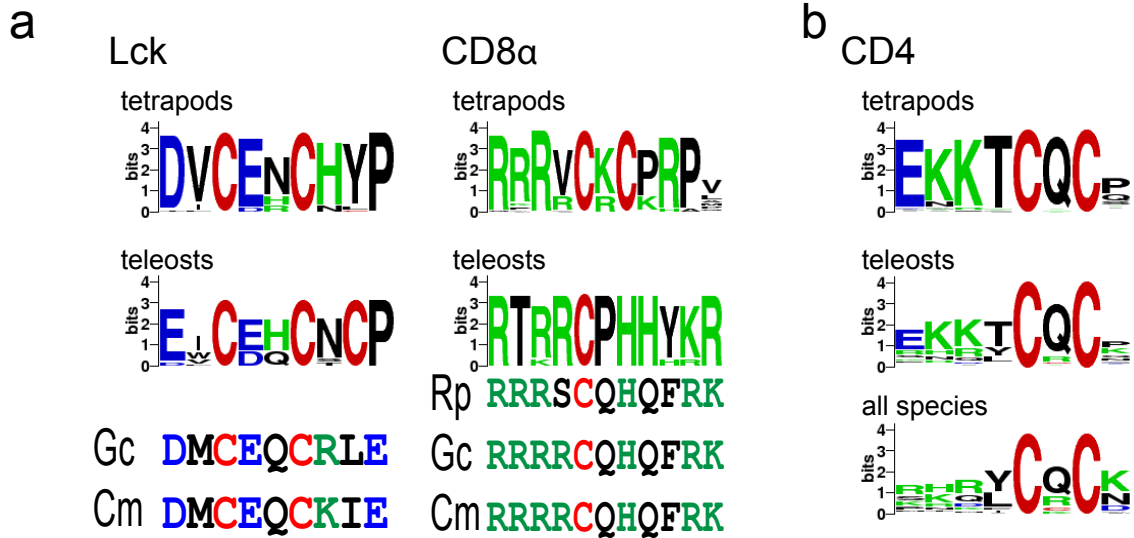

**c**

*H. sapiens* MNRGVPFRHLLLVQLALLPAATQG-----  
*G. cirratum* MWACVCDLFLSLSLCVFISSLPLCCPLFLSSQRVVCVKVWKSFSAAALLGRLVAFGTDAE

*H. sapiens* -----  
*G. cirratum* LDTHPVPLPFSFHPETSQVIPGETEQGWLAVVELGPM DVPTSPLVRLCGIFLLLITALPP

*H. sapiens* -----KKVVLGK-----KGDVELTCTASQ--KKS IQ-----FHWKNSN----QIKILGN  
*G. cirratum* GSRVSPYVTEGDTVYACQGETITLLCQVPDVVSRPITSPPGFWKWTADSGTGTTLTILQY

*H. sapiens* QGSFLTCKGPSKLNDR--DSRRSLWDQGNFPLI IKNLKI ESDTYICEVE----DQKEEV  
*G. cirratum* LSSVRSNSFSKLSARSRISERRQF---GNFSLLISSLDRSDSGSYSCEFSFGRSQARATW

*H. sapiens* QLLVFGLTANS DTHLLQGS LTLTLESPPGSSPSVQCRSPRGKNIQGGKTL SVSQLELQD  
*G. cirratum* QLRVIEVKATMANPLIETQVELTCE---GSVQNVSWSGPLGPA-GKGRTLALS NLAVQH

*H. sapiens* SGTWTCTVLQNKQKVE--FKIDIVVLAFQKASSIVYKKEGEQVEFSFPLAFTVEKLTGSG  
*G. cirratum* QGDWVCTCWFPGGTVQSR YQLDVVGLNEPLDKPVFLPVSS---AFLLPCLRN-KALLPLK

*H. sapiens* ELWWQAER-----ASSSKSWITFDLKNKEVSVKRVTDPKLQMGKKLPLHL  
*G. cirratum* AAWYQDQELITLKADSVTKTWSKPQVPWVLFSSSQPITNLSVMVRAVTLAQQGTFECRV

*H. sapiens* TLPQALPQYAGSGNLTALAEAKTGK LHQEVNLVVMRATQLQKNLTCEVWGPTSPKLMLSL  
*G. cirratum* TLKGV TIRRMVNVTLIEVRGSHPTVPVPGTNMSLVCNVSSHSGQTGIRW--RSPSTMEGL

*H. sapiens* KLENKEAKVSKREKAVVVLNPEAGMWQCLLSDS-----GQVLLESNIKVLPTWSTPVQP  
*G. cirratum* EDRRVRGEGSLLIRLIEVTQRHVGDWICEISQGDQLCGQGTYSLNITLTLSEFGDP--P

*H. sapiens* MALIVLGGVAGL-LLFIGLGIFFCV--RCRHRRRQAERMS-----QIKRLLSEKK----  
*G. cirratum* LVLIIAASVGAFVLLLLLATVIAVCLSKRARRRRRALKRLRHPLCREHSYQLSNQPLCHS  
*C. milii* <LYVTPGV LGVLLIVILVLSVCSI KH-RQTRRRR-LRRMKYPLCRVHSNQLSNQPLCGS

*H. sapiens* -----TCQCPHRFQKTCSPI-----  
*G. cirratum* NDYTPGDRPLPPPPIPYCPHRQPRKGRPSHARGSRHARRSQFGP  
*C. milii* NDYVPSHRPLTPPRMSCPHKQRTTRKPRAGAGGRVY

Signal peptide

IgSF domains

Transmembrane helix

**d**

| Gene       | Transcript ID      | Length (bp) | TPM                      | Ratio (x/LCK)          |
|------------|--------------------|-------------|--------------------------|------------------------|
| CD4-R/LAG3 | NS_thymus KC707916 | 3,673       | 0.866 x 10 <sup>-3</sup> | 3.4 x 10 <sup>-6</sup> |
| CD8A       | NS_thymus KC707917 | 3,799       | 21.98                    | 85 x 10 <sup>-3</sup>  |
| LCK        | NS_thymus KC707918 | 6,445       | 258.41                   |                        |
| CD4-R/LAG3 | NS_spleen KC707916 | 1,894       | 2.83 x 10 <sup>-3</sup>  | 82 x 10 <sup>-6</sup>  |
| CD8A       | NS_spleen KC707917 | 2,622       | 2.64                     | 77 x 10 <sup>-3</sup>  |
| LCK        | NS_spleen KC707918 | 4,186       | 34.41                    |                        |



**Supplementary Figure XI.8 | Protein signatures of LCK, and CD8 and CD4 co-receptors.**

**a**, Sequence motifs of the CD8 $\alpha$  and CD4 interaction domain of LCK in tetrapods and teleosts; the sequences in LCK proteins of cartilaginous fishes are similar (left panel). Signature of the interaction domain in CD8 $\alpha$  proteins of tetrapods, teleosts and cartilaginous fishes; note that the CXH motif in teleosts is functionally equivalent to the CXC motif in tetrapods; the sequences in cartilaginous fishes conform to the fish signature. Rp, *Rhinobatus productus*; Gc, *Ginglymostoma cirratum*; Cm, *Callorhynchus milii*. **b**, The LCK interaction motif is identical in tetrapods and teleosts. **c**, Protein sequence alignment of human CD4 and the closest relative identified in databases of cartilaginous fishes. Note the identical domain structure of the extracellular IgSF and transmembrane domains; however, the intra-cytoplasmic domain is much longer in the proteins of cartilaginous fishes and lacks the characteristic CXC motif required for interaction with LCK. **d**, Expression analysis of relevant genes in the transcriptomes of thymus and spleen the nurse shark (NS) *G. cirratum*. Note the vastly different expression levels of *CD8A* and the *CD4*-related genes.

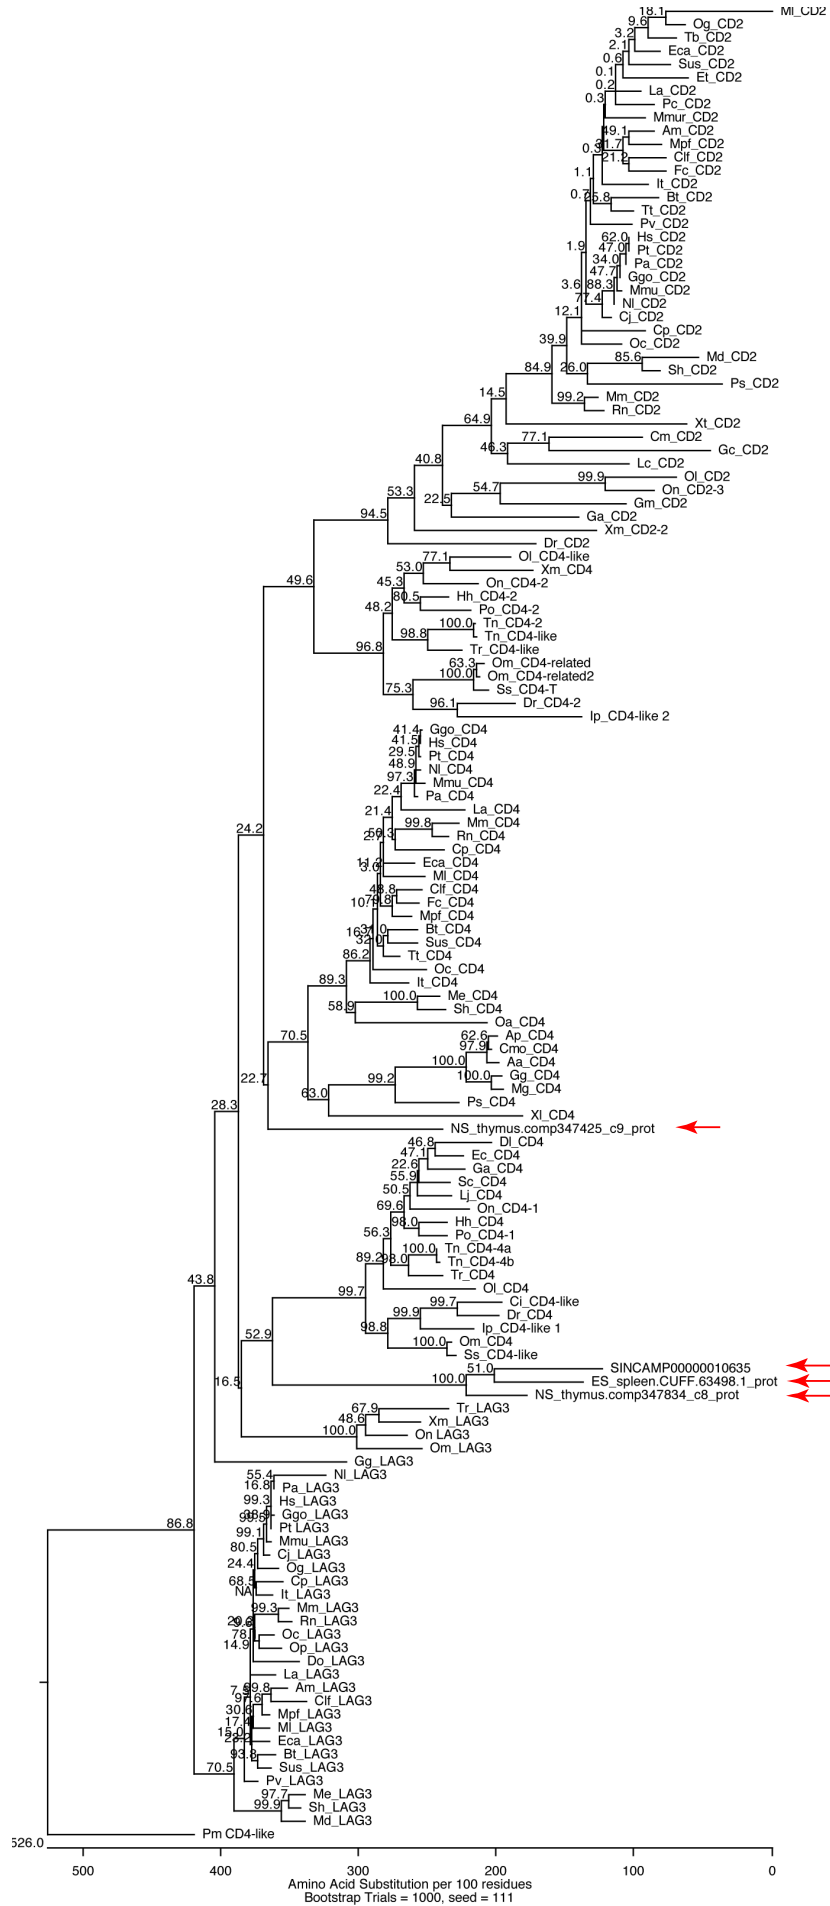

**Supplementary Figure XI.9 | Phylogenetic analysis of CD4-like proteins of vertebrates.**

In this analysis, LAG3 and CD2 sequences were included. The sequences used for this analysis, including species identifiers are listed in Supplementary Table XI.12. Arrows indicate the positions of relevant proteins of cartilaginous fishes (see Supplementary Table XI.13 for details).

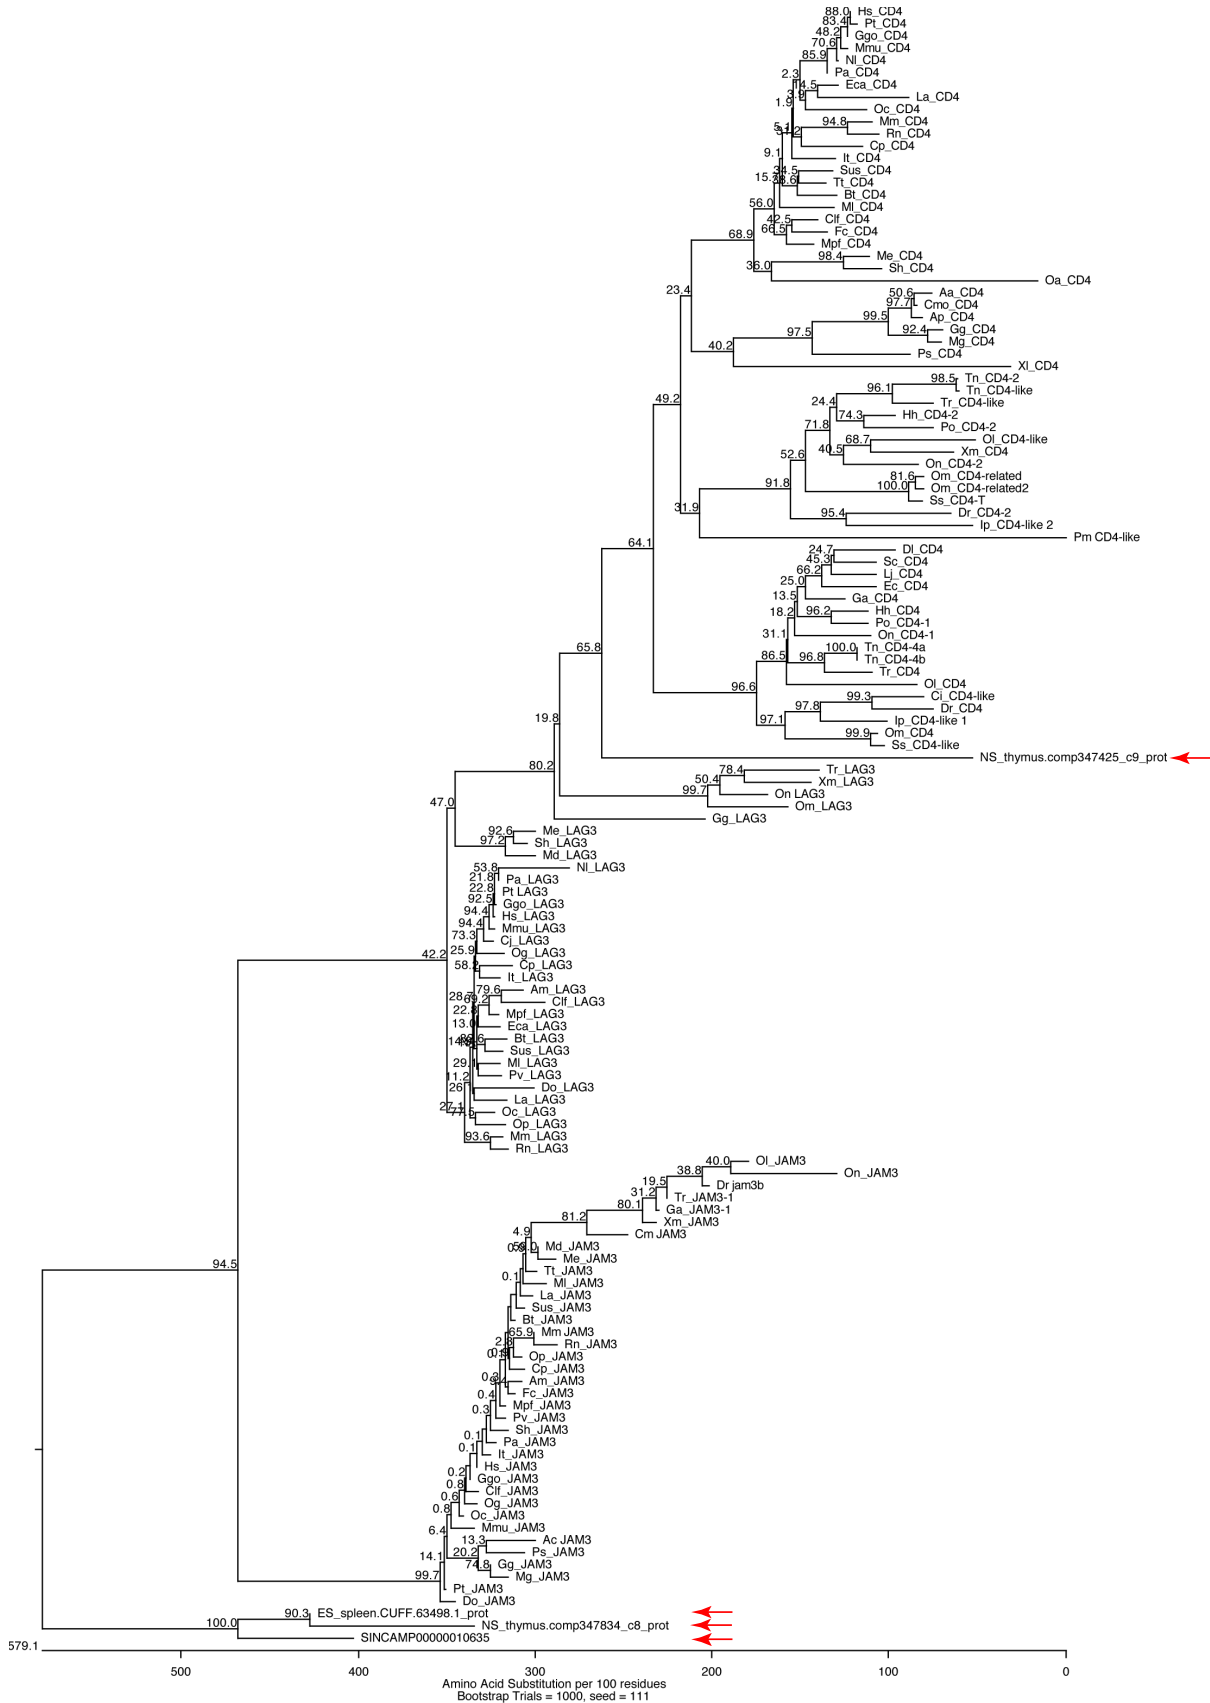

**Supplementary Figure XI.10 | Phylogenetic analysis of CD4-like proteins of vertebrates.** Similar to Supplementary Figure XI.9, except for inclusion of LAG3 and JAM3 sequences.

## References

- Alioto TS, Ngai J. 2006. The repertoire of olfactory C family G protein-coupled receptors in zebrafish: candidate chemosensory receptors for amino acids. *BMC Genomics*. 7:309.
- Castresana J. 2000. Selection of conserved blocks from multiple alignments for their use in phylogenetic analysis. *Mol Biol Evol*. 17:540-552.
- Grus WE, Zhang J. 2009. Origin of the genetic components of the vomeronasal system in the common ancestor of all extant vertebrates. *Mol Biol Evol*. 26:407-419.
- Heimberg AM, Cowper-Sal-lari R, Semon M, Donoghue PC, Peterson KJ. 2010. microRNAs reveal the interrelationships of hagfish, lampreys, and gnathostomes and the nature of the ancestral vertebrate. *Proc Natl Acad Sci U S A*. 107:19379-19383.
- Katoh K, Misawa K, Kuma K, Miyata T. 2002. MAFFT: a novel method for rapid multiple sequence alignment based on fast Fourier transform. *Nucleic Acids Res*. 30:3059-3066.
- Krzywinski M, Schein J, Birol I, Connors J, Gascoyne R, Horsman D, Jones SJ, Marra MA. 2009. Circos: an information aesthetic for comparative genomics. *Genome research*. 19:1639-1645.
- Niimura Y. 2009. On the origin and evolution of vertebrate olfactory receptor genes: comparative genome analysis among 23 chordate species. *Genome Biol Evol*. 1:34-44.
- Tamura K, Peterson D, Peterson N, Stecher G, Nei M, Kumar S. 2011. MEGA5: molecular evolutionary genetics analysis using maximum likelihood, evolutionary distance, and maximum parsimony methods. *Mol Biol Evol*. 28:2731-2739.

**Supplementary Table I.1 | Assembly statistics for *Callorhinchus milii*-6.1.3**

|               | <b>Contigs</b> | <b>Scaffolds</b> |
|---------------|----------------|------------------|
| Total numbers | 67,425         | 21,208           |
| Total bases   | 936,942,150    | 974,487,278      |
| N50 bases     | 46,577         | 4,521,921        |
| N50 number    | 5,393          | 60               |
| Maximum bases | 631,173        | 18,507,834       |

**Supplementary Table I.2 | Types of interspersed repetitive sequences in the *C. milii* genome**

| Type of sequence      | Number of copies | Total length (Mb) | Percentage of genome |
|-----------------------|------------------|-------------------|----------------------|
| LINE                  | ~374,000         | 117.7             | 12.6%                |
| - L2                  | ~246,000         | 79.8              | 8.5%                 |
| - CR1                 | ~124,000         | 37.0              | 4.0%                 |
| - Others              | ~4,000           | 0.9               | 0.1%                 |
| SINE                  | ~753,000         | 123.2             | 13.1%                |
| - tRNA-L2             | ~550,000         | 94.0              | 10.0%                |
| - Deu                 | ~180,000         | 27.4              | 2.9%                 |
| - Others              | ~23,000          | 1.8               | 0.2%                 |
| DNA transposon        | ~55,000          | 5.9               | 0.6%                 |
| LTR element           | ~24,000          | 3.5               | 0.4%                 |
| Others/Unclassified   | ~112,000         | 21.7              | 2.3%                 |
| Total (non-redundant) | -                | 264.0             | 28.2%                |

**Supplementary Table I.3 | Proportion of callable genome, number of SNPs and Ti/Tv for the consecutive filters applied in the SNP calling.**

These statistics were obtained for the CDS too.

| <b>Scaffolds with length &gt; 50kb</b> |                                                    |                       |                                                   |                                                                |                                                                                         |            |
|----------------------------------------|----------------------------------------------------|-----------------------|---------------------------------------------------|----------------------------------------------------------------|-----------------------------------------------------------------------------------------|------------|
|                                        | <b>bp mapable and not found in repeats or gaps</b> | <b>without INDELS</b> | <b>w/o INDELS AND coverage between 5× and 15×</b> | <b>w/o INDELS AND coverage between 5× and 15× AND w/o DUPs</b> | <b>w/o INDELS AND coverage between 5× and 15× AND with interval of 3bp between SNPs</b> | <b>CDS</b> |
| <b>Number Scaffolds</b>                | 657                                                | 657                   | 657                                               | 649                                                            | 649                                                                                     | 515        |
| <b>Callable bp</b>                     | 618,687,353                                        | 247,295,157           | 172,861,486                                       | 172,721,512                                                    | 172,697,509                                                                             | 3,042,472  |
| <b>Percentage Genome</b>               | 63.48                                              | 25.37                 | 17.73                                             | 17.72                                                          | 17.72                                                                                   | 0.31       |
| <b>Number of SNPs</b>                  | 1,519,279                                          | 530,021               | 429,272                                           | 426,093                                                        | 402,090                                                                                 | 4,099      |
| <b>Ti/tv</b>                           | 1.618                                              | 1.802                 | 1.817                                             | 1.828                                                          | 1.868                                                                                   | 3.027      |



**Supplementary Table I.4 | Comparison of heterozygosity value with other fish species.**

|                           | <b># Kb in the callable portion of the assembly</b> | <b># SNPs</b> | <b>Heterozygosity (per bp)</b> |
|---------------------------|-----------------------------------------------------|---------------|--------------------------------|
| Medaka <sup>1</sup>       | 480,300                                             | 16,448,457    | N/A                            |
| Atlantic cod <sup>2</sup> | 500,614                                             | 1,047,875     | 0.00209                        |
| <i>C. milii</i>           | 172,698                                             | 402,090       | 0.00233                        |

<sup>1</sup>Kasahara et al. 2007

<sup>2</sup>Star et al. 2011

**Supplementary Table I.5 | Summary of duplication analysis in the *C. milii* genome.**

|                                   | All segments              | Duplications (SD>3, >10windows) |
|-----------------------------------|---------------------------|---------------------------------|
| # Windows                         | 661,750                   | 3,117                           |
| # Segments                        | 17,711                    | 179                             |
| # Windows / segment               | 37                        | 17                              |
| Mean coverage (SD)                | 9.24 (28.91) <sup>a</sup> | 46.28 (40.00) <sup>b</sup>      |
| # bp in duplications <sup>c</sup> | —                         | 5,466,045                       |
| % genome <sup>d</sup>             | —                         | 0.56                            |
| Size range (Kb)                   | —                         | 12–297                          |
| Median size (Kb)                  | —                         | 31                              |

<sup>a</sup>Calculated from all windows used for segmentation and before smoothing

<sup>b</sup>Calculated from only those windows defined as duplicated after the segmentation step

<sup>c</sup>Not corrected for copy-number

<sup>d</sup>Relative to the total length of the assembly

**Supplementary Table I.6 | List of *C. milii* scaffolds with the number of duplications and the percentage of their sequence considered as duplicated.**

| <b>Scaffold</b> | <b>Scaffold length (bp)</b> | <b>Number of duplications</b> | <b>Number of base pairs in duplications</b> | <b>Percentage of base pairs in duplications</b> |
|-----------------|-----------------------------|-------------------------------|---------------------------------------------|-------------------------------------------------|
| scaffold_1      | 18,507,834                  | 1                             | 16,736                                      | 0.09                                            |
| scaffold_7      | 13,485,325                  | 1                             | 21,409                                      | 0.16                                            |
| scaffold_19     | 9,386,079                   | 1                             | 34,492                                      | 0.37                                            |
| scaffold_33     | 6,506,902                   | 1                             | 29,764                                      | 0.46                                            |
| scaffold_41     | 5,334,932                   | 1                             | 93,782                                      | 1.76                                            |
| scaffold_64     | 4,326,226                   | 1                             | 145,814                                     | 3.37                                            |
| scaffold_76     | 3,867,380                   | 1                             | 79,759                                      | 2.06                                            |
| scaffold_86     | 3,567,987                   | 1                             | 31,118                                      | 0.87                                            |
| scaffold_92     | 3,337,817                   | 1                             | 24,567                                      | 0.74                                            |
| scaffold_109    | 2,628,759                   | 1                             | 78,201                                      | 2.97                                            |
| scaffold_111    | 2,535,139                   | 1                             | 62,208                                      | 2.45                                            |
| scaffold_122    | 2,111,713                   | 1                             | 17,613                                      | 0.83                                            |
| scaffold_180    | 1,072,290                   | 1                             | 19,825                                      | 1.85                                            |
| scaffold_199    | 890,228                     | 1                             | 97,682                                      | 10.97                                           |
| scaffold_220    | 694,188                     | 7                             | 552,592                                     | 79.60                                           |
| scaffold_221    | 690,336                     | 1                             | 16,398                                      | 2.38                                            |
| scaffold_232    | 601,629                     | 1                             | 94,168                                      | 15.65                                           |
| scaffold_285    | 404,662                     | 1                             | 17,057                                      | 4.22                                            |
| scaffold_290    | 389,319                     | 6                             | 205,434                                     | 52.77                                           |
| scaffold_296    | 371,076                     | 1                             | 16,767                                      | 4.52                                            |
| scaffold_325    | 287,866                     | 4                             | 235,431                                     | 81.78                                           |
| scaffold_371    | 182,215                     | 2                             | 178,030                                     | 97.70                                           |
| scaffold_375    | 175,851                     | 1                             | 175,850                                     | 100.00                                          |
| scaffold_396    | 147,573                     | 2                             | 141,802                                     | 96.09                                           |
| scaffold_408    | 129,947                     | 2                             | 129,771                                     | 99.86                                           |
| scaffold_430    | 112,960                     | 1                             | 30,493                                      | 26.99                                           |
| scaffold_449    | 99,835                      | 2                             | 91,371                                      | 91.52                                           |
| scaffold_491    | 83,118                      | 1                             | 19,492                                      | 23.45                                           |
| scaffold_494    | 81,585                      | 1                             | 37,572                                      | 46.05                                           |
| scaffold_535    | 69,203                      | 1                             | 69,202                                      | 100.00                                          |
| scaffold_567    | 63,060                      | 1                             | 21,168                                      | 33.57                                           |
| scaffold_608    | 55,744                      | 1                             | 55,743                                      | 100.00                                          |
| scaffold_620    | 54,570                      | 1                             | 54,569                                      | 100.00                                          |
| scaffold_635    | 52,906                      | 1                             | 52,905                                      | 100.00                                          |
| scaffold_650    | 50,623                      | 1                             | 50,576                                      | 99.91                                           |
| scaffold_659    | 49,577                      | 1                             | 49,288                                      | 99.42                                           |
| scaffold_663    | 49,074                      | 1                             | 49,073                                      | 100.00                                          |
| scaffold_670    | 47,875                      | 1                             | 47,814                                      | 99.87                                           |
| scaffold_694    | 44,534                      | 1                             | 44,533                                      | 100.00                                          |
| scaffold_695    | 44,304                      | 1                             | 19,285                                      | 43.53                                           |

|               |        |   |        |        |
|---------------|--------|---|--------|--------|
| scaffold_729  | 39,587 | 1 | 24,698 | 62.39  |
| scaffold_746  | 37,355 | 1 | 37,354 | 100.00 |
| scaffold_759  | 35,906 | 1 | 35,905 | 100.00 |
| scaffold_793  | 32,335 | 1 | 31,801 | 98.35  |
| scaffold_804  | 31,283 | 1 | 19,285 | 61.65  |
| scaffold_814  | 30,750 | 1 | 30,749 | 100.00 |
| scaffold_829  | 30,080 | 1 | 30,079 | 100.00 |
| scaffold_848  | 29,199 | 1 | 29,002 | 99.33  |
| scaffold_858  | 28,618 | 1 | 28,617 | 100.00 |
| scaffold_859  | 28,572 | 1 | 28,482 | 99.69  |
| scaffold_903  | 26,462 | 1 | 24,140 | 91.23  |
| scaffold_915  | 25,850 | 1 | 25,849 | 100.00 |
| scaffold_923  | 25,455 | 1 | 25,454 | 100.00 |
| scaffold_930  | 24,950 | 1 | 24,949 | 100.00 |
| scaffold_937  | 24,818 | 1 | 24,817 | 100.00 |
| scaffold_942  | 24,653 | 1 | 24,652 | 100.00 |
| scaffold_951  | 24,376 | 1 | 24,054 | 98.68  |
| scaffold_958  | 23,756 | 1 | 23,569 | 99.21  |
| scaffold_960  | 23,720 | 1 | 23,719 | 100.00 |
| scaffold_971  | 23,461 | 1 | 23,168 | 98.75  |
| scaffold_982  | 23,323 | 1 | 23,322 | 100.00 |
| scaffold_980  | 23,185 | 1 | 23,184 | 100.00 |
| scaffold_993  | 22,861 | 1 | 22,624 | 98.96  |
| scaffold_1001 | 22,762 | 1 | 22,761 | 100.00 |
| scaffold_1002 | 22,484 | 1 | 22,483 | 100.00 |
| scaffold_1022 | 21,827 | 1 | 21,826 | 100.00 |
| scaffold_1025 | 21,773 | 1 | 21,772 | 100.00 |
| scaffold_1032 | 21,503 | 1 | 21,502 | 100.00 |
| scaffold_1055 | 21,082 | 1 | 21,081 | 100.00 |
| scaffold_1058 | 21,023 | 1 | 20,674 | 98.34  |
| scaffold_1054 | 21,005 | 1 | 21,004 | 100.00 |
| scaffold_1077 | 20,780 | 1 | 20,150 | 96.97  |
| scaffold_1073 | 20,654 | 1 | 20,653 | 100.00 |
| scaffold_1080 | 20,502 | 1 | 20,501 | 100.00 |
| scaffold_1092 | 20,296 | 1 | 20,295 | 100.00 |
| scaffold_1088 | 20,193 | 1 | 20,192 | 100.00 |
| scaffold_1121 | 19,627 | 1 | 19,626 | 99.99  |
| scaffold_1118 | 19,600 | 1 | 19,329 | 98.62  |
| scaffold_1124 | 19,597 | 1 | 19,452 | 99.26  |
| scaffold_1126 | 19,499 | 1 | 19,498 | 99.99  |
| scaffold_1149 | 19,476 | 1 | 19,475 | 99.99  |
| scaffold_1132 | 19,373 | 1 | 19,372 | 99.99  |
| scaffold_1138 | 19,314 | 1 | 19,173 | 99.27  |
| scaffold_1141 | 19,283 | 1 | 19,282 | 99.99  |
| scaffold_1142 | 19,279 | 1 | 18,927 | 98.17  |
| scaffold_1158 | 18,968 | 1 | 18,860 | 99.43  |

|               |        |   |        |       |
|---------------|--------|---|--------|-------|
| scaffold_1155 | 18,935 | 1 | 18,663 | 98.56 |
| scaffold_1161 | 18,855 | 1 | 18,854 | 99.99 |
| scaffold_1170 | 18,674 | 1 | 18,673 | 99.99 |
| scaffold_1166 | 18,648 | 1 | 18,647 | 99.99 |
| scaffold_1169 | 18,597 | 1 | 18,596 | 99.99 |
| scaffold_1179 | 18,541 | 1 | 18,476 | 99.65 |
| scaffold_1175 | 18,535 | 1 | 18,534 | 99.99 |
| scaffold_1195 | 18,298 | 1 | 18,297 | 99.99 |
| scaffold_1210 | 18,067 | 1 | 18,066 | 99.99 |
| scaffold_1207 | 18,032 | 1 | 18,031 | 99.99 |
| scaffold_1227 | 17,904 | 1 | 17,903 | 99.99 |
| scaffold_1218 | 17,771 | 1 | 17,770 | 99.99 |
| scaffold_1226 | 17,679 | 1 | 17,678 | 99.99 |
| scaffold_1224 | 17,673 | 1 | 17,672 | 99.99 |
| scaffold_1230 | 17,643 | 1 | 17,596 | 99.73 |
| scaffold_1228 | 17,573 | 1 | 17,321 | 98.57 |
| scaffold_1234 | 17,566 | 1 | 17,565 | 99.99 |
| scaffold_1231 | 17,540 | 1 | 15,555 | 88.68 |
| scaffold_1246 | 17,428 | 1 | 17,077 | 97.99 |
| scaffold_1260 | 17,368 | 1 | 17,367 | 99.99 |
| scaffold_1251 | 17,287 | 1 | 17,286 | 99.99 |
| scaffold_1253 | 17,264 | 1 | 17,172 | 99.47 |
| scaffold_1258 | 17,236 | 1 | 17,235 | 99.99 |
| scaffold_1254 | 17,226 | 1 | 17,128 | 99.43 |
| scaffold_1256 | 17,183 | 1 | 17,182 | 99.99 |
| scaffold_1268 | 17,038 | 1 | 17,037 | 99.99 |
| scaffold_1275 | 16,985 | 1 | 16,984 | 99.99 |
| scaffold_1288 | 16,859 | 1 | 16,858 | 99.99 |
| scaffold_1290 | 16,841 | 1 | 16,788 | 99.69 |
| scaffold_1292 | 16,750 | 1 | 16,749 | 99.99 |
| scaffold_1293 | 16,722 | 1 | 16,721 | 99.99 |
| scaffold_1309 | 16,689 | 1 | 16,688 | 99.99 |
| scaffold_1311 | 16,513 | 1 | 14,089 | 85.32 |
| scaffold_1327 | 16,203 | 1 | 16,202 | 99.99 |
| scaffold_1334 | 16,035 | 1 | 16,034 | 99.99 |
| scaffold_1346 | 15,965 | 1 | 15,867 | 99.39 |
| scaffold_1344 | 15,908 | 1 | 15,838 | 99.56 |
| scaffold_1352 | 15,832 | 1 | 15,831 | 99.99 |
| scaffold_1354 | 15,811 | 1 | 15,508 | 98.08 |
| scaffold_1377 | 15,678 | 1 | 15,677 | 99.99 |
| scaffold_1392 | 15,640 | 1 | 15,589 | 99.67 |
| scaffold_1367 | 15,619 | 1 | 15,421 | 98.73 |
| scaffold_1382 | 15,566 | 1 | 15,565 | 99.99 |
| scaffold_1380 | 15,508 | 1 | 15,507 | 99.99 |
| scaffold_1381 | 15,499 | 1 | 15,498 | 99.99 |
| scaffold_1386 | 15,436 | 1 | 15,435 | 99.99 |

|               |        |   |        |       |
|---------------|--------|---|--------|-------|
| scaffold_1387 | 15,423 | 1 | 15,422 | 99.99 |
| scaffold_1389 | 15,412 | 1 | 15,411 | 99.99 |
| scaffold_1401 | 15,308 | 1 | 14,719 | 96.15 |
| scaffold_1436 | 14,998 | 1 | 14,997 | 99.99 |
| scaffold_1453 | 14,716 | 1 | 14,715 | 99.99 |
| scaffold_1470 | 14,577 | 1 | 14,517 | 99.59 |
| scaffold_1479 | 14,495 | 1 | 14,494 | 99.99 |
| scaffold_1481 | 14,424 | 1 | 14,423 | 99.99 |
| scaffold_1522 | 14,205 | 1 | 14,204 | 99.99 |
| scaffold_1511 | 14,092 | 1 | 14,091 | 99.99 |
| scaffold_1531 | 13,923 | 1 | 13,922 | 99.99 |
| scaffold_1558 | 13,805 | 1 | 13,804 | 99.99 |
| scaffold_1549 | 13,800 | 1 | 13,735 | 99.53 |
| scaffold_1559 | 13,704 | 1 | 13,703 | 99.99 |
| scaffold_1568 | 13,696 | 1 | 13,695 | 99.99 |
| scaffold_1564 | 13,651 | 1 | 13,650 | 99.99 |
| scaffold_1570 | 13,605 | 1 | 13,604 | 99.99 |
| scaffold_1571 | 13,601 | 1 | 13,498 | 99.24 |
| scaffold_1583 | 13,497 | 1 | 13,496 | 99.99 |
| scaffold_1605 | 13,493 | 1 | 13,492 | 99.99 |
| scaffold_1590 | 13,433 | 1 | 13,432 | 99.99 |
| scaffold_1609 | 13,292 | 1 | 13,291 | 99.99 |
| scaffold_1612 | 13,266 | 1 | 12,879 | 97.08 |
| scaffold_1628 | 13,232 | 1 | 13,231 | 99.99 |
| scaffold_1641 | 13,118 | 1 | 13,117 | 99.99 |
| scaffold_1664 | 12,910 | 1 | 12,909 | 99.99 |
| scaffold_1693 | 12,725 | 1 | 12,724 | 99.99 |
| scaffold_1786 | 12,196 | 1 | 12,195 | 99.99 |
| scaffold_1854 | 11,731 | 1 | 11,730 | 99.99 |

**Supplementary Table I.7 | *C. milii* genes covered by segmental duplication.**

Coverage\_by\_duplication: indicates whether the duplication covers fully or partially the sequence of the gene; Exons\_in\_duplication: number of exons fully or partially covered by the duplication; Exons\_out\_duplication: number of exons not covered by the duplication; Exons\_details: all exons are listed indicating if they are not covered (e), partially covered (p) or, otherwise, totally covered by a duplication.

| Scaffold | Start  | End    | Gene name    | Gene_type      | Coverage_by_duplication | Exons_in_duplication | Exons_out_duplication | Exons_details          |
|----------|--------|--------|--------------|----------------|-------------------------|----------------------|-----------------------|------------------------|
| #220     | 672127 | 676616 | ADPRH        | protein_coding | full                    | 6                    | 0                     | 1, 2, 3, 4, 5, 6       |
| #92      | 201179 | 203570 | B0YN61_CALMI | protein_coding | partial                 | 1                    | 0                     | 1 (p)                  |
| #92      | 204375 | 206781 | B0YN62_CALMI | protein_coding | full                    | 1                    | 0                     | 1                      |
| #92      | 207555 | 210039 | B0YN63_CALMI | protein_coding | full                    | 1                    | 0                     | 1                      |
| #92      | 210885 | 213291 | B0YN64_CALMI | protein_coding | full                    | 1                    | 0                     | 1                      |
| #92      | 214059 | 216543 | B0YN65_CALMI | protein_coding | full                    | 1                    | 0                     | 1                      |
| #92      | 217778 | 220262 | B0YN66_CALMI | protein_coding | full                    | 1                    | 0                     | 1                      |
| #92      | 220422 | 223917 | B0YN67_CALMI | protein_coding | full                    | 1                    | 0                     | 1                      |
| #92      | 224026 | 228083 | B0YN68_CALMI | protein_coding | partial                 | 1                    | 0                     | 1 (p)                  |
| #494     | 4924   | 5797   | CCR1         | protein_coding | full                    | 2                    | 0                     | 1, 2                   |
| #1149    | 8326   | 9028   | CXCR7        | protein_coding | full                    | 2                    | 0                     | 1, 2                   |
| #1559    | 9532   | 13182  | DMBT1        | protein_coding | full                    | 4                    | 0                     | 1, 2, 3, 4             |
| #1559    | 9625   | 13071  | DMBT1        | protein_coding | full                    | 5                    | 0                     | 1, 2, 3, 4, 5          |
| #1559    | 9559   | 13101  | DMBT1        | protein_coding | full                    | 6                    | 0                     | 1, 2, 3, 4, 5, 6       |
| #903     | 23623  | 26124  | DMBT1        | protein_coding | partial                 | 1                    | 3                     | 1, 2 (e), 3 (e), 4 (e) |

|       |             |         |        |                |      |   |   |                  |
|-------|-------------|---------|--------|----------------|------|---|---|------------------|
| #1170 | 10396       | 16904   | FAM55C | protein_coding | full | 6 | 0 | 1, 2, 3, 4, 5, 6 |
| #86   | 7649        | 12120   | FASN   | protein_coding | full | 3 | 0 | 1, 2, 3          |
| #371  | 41119       | 41992   | GPR139 | protein_coding | full | 3 | 0 | 1, 2, 3          |
| #1001 | 14311       | 17056   | GPR139 | protein_coding | full | 2 | 0 | 1, 2             |
| #635  | 44412       | 45312   | GPR139 | protein_coding | full | 2 | 0 | 1, 2             |
| #1158 | 13988       | 14876   | GPR139 | protein_coding | full | 2 | 0 | 1, 2             |
| #111  | 243146<br>1 | 2432367 | GPR139 | protein_coding | full | 1 | 0 | 1                |
| #1389 | 211         | 12846   | GPR139 | protein_coding | full | 4 | 0 | 1, 2, 3, 4       |
| #1032 | 5975        | 8140    | GPR139 | protein_coding | full | 2 | 0 | 1, 2             |
| #958  | 7006        | 7870    | GPR139 | protein_coding | full | 2 | 0 | 1, 2             |
| #430  | 84068       | 84989   | GPR139 | protein_coding | full | 2 | 0 | 1, 2             |
| #858  | 12550       | 13650   | GPR142 | protein_coding | full | 2 | 0 | 1, 2             |
| #111  | 240868<br>3 | 2409544 | GPR142 | protein_coding | full | 2 | 0 | 1, 2             |
| #325  | 203656      | 204794  | GPR142 | protein_coding | full | 2 | 0 | 1, 2             |
| #1141 | 6373        | 7243    | GPR142 | protein_coding | full | 2 | 0 | 1, 2             |
| #1207 | 7471        | 8305    | GPR142 | protein_coding | full | 2 | 0 | 1, 2             |
| #1401 | 9009        | 9822    | GPR142 | protein_coding | full | 3 | 0 | 1, 2, 3          |
| #1132 | 12016       | 13976   | GPR142 | protein_coding | full | 2 | 0 | 1, 2             |
| #1628 | 4838        | 5709    | GPR142 | protein_coding | full | 2 | 0 | 1, 2             |
| #1309 | 2534        | 3194    | GPR142 | protein_coding | full | 2 | 0 | 1, 2             |
| #1275 | 8056        | 8920    | GPR142 | protein_coding | full | 2 | 0 | 1, 2             |
| #694  | 21691       | 22432   | GPR142 | protein_coding | full | 2 | 0 | 1, 2             |
| #1354 | 7081        | 9821    | GPR142 | protein_coding | full | 2 | 0 | 1, 2             |
| #1195 | 16219       | 17079   | GPR142 | protein_coding | full | 3 | 0 | 1, 2, 3          |
| #220  | 222267      | 222990  | GPR142 | protein_coding | full | 2 | 0 | 1, 2             |
| #325  | 128435      | 129314  | GPR142 | protein_coding | full | 3 | 0 | 1, 2, 3          |
| #1234 | 9714        | 11416   | GPR142 | protein_coding | full | 3 | 0 | 1, 2, 3          |
| #1124 | 17952       | 19047   | GPR142 | protein_coding | full | 2 | 0 | 1, 2             |



|       |         |         |          |                |      |    |   |                               |
|-------|---------|---------|----------|----------------|------|----|---|-------------------------------|
| #111  | 2420309 | 2420978 | GPR142   | protein_coding | full | 2  | 0 | 1, 2                          |
| #1092 | 14325   | 15541   | GPR142   | protein_coding | full | 2  | 0 | 1, 2                          |
| #290  | 317836  | 318628  | GPR142   | protein_coding | full | 2  | 0 | 1, 2                          |
| #951  | 10933   | 12756   | GPR142   | protein_coding | full | 3  | 0 | 1, 2, 3                       |
| #285  | 3401    | 7529    | HEBP2    | protein_coding | full | 4  | 0 | 1, 2, 3, 4                    |
| #180  | 548607  | 559469  | ICAM2    | protein_coding | full | 4  | 0 | 1, 2, 3, 4                    |
| #1564 | 5935    | 12547   | IGHM     | protein_coding | full | 10 | 0 | 1, 2, 3, 4, 5, 6, 7, 8, 9, 10 |
| #1564 | 6043    | 12544   | IGHM     | protein_coding | full | 4  | 0 | 1, 2, 3, 4                    |
| #1549 | 4394    | 9667    | IGHM     | protein_coding | full | 3  | 0 | 1, 2, 3                       |
| #1570 | 3922    | 11892   | IGHM     | protein_coding | full | 7  | 0 | 1, 2, 3, 4, 5, 6, 7           |
| #1166 | 11038   | 17541   | ighm     | protein_coding | full | 4  | 0 | 1, 2, 3, 4                    |
| #1564 | 2789    | 12544   | IGHM     | protein_coding | full | 6  | 0 | 1, 2, 3, 4, 5, 6              |
| #1570 | 3832    | 7976    | IGHM     | protein_coding | full | 4  | 0 | 1, 2, 3, 4                    |
| #1549 | 2632    | 9667    | IGHM     | protein_coding | full | 10 | 0 | 1, 2, 3, 4, 5, 6, 7, 8, 9, 10 |
| #220  | 684076  | 693002  | ighm     | protein_coding | full | 7  | 0 | 1, 2, 3, 4, 5, 6, 7           |
| #1166 | 8118    | 11287   | ighm     | protein_coding | full | 2  | 0 | 1, 2                          |
| #1253 | 10427   | 15902   | IGHM     | protein_coding | full | 4  | 0 | 1, 2, 3, 4                    |
| #1344 | 930     | 1272    | ighv13-2 | protein_coding | full | 1  | 0 | 1                             |
| #937  | 11847   | 12195   | ighv13-2 | protein_coding | full | 1  | 0 | 1                             |
| #220  | 24649   | 31824   | IGHV3-23 | protein_coding | full | 6  | 0 | 1, 2, 3, 4, 5, 6              |
| #1436 | 6451    | 8539    | IGHV3-30 | protein_coding | full | 2  | 0 | 1, 2                          |
| #793  | 20184   | 22836   | IGHV3-53 | protein_coding | full | 2  | 0 | 1, 2                          |
| #1025 | 18449   | 20781   | IGHV3-53 | protein_coding | full | 4  | 0 | 1, 2, 3, 4                    |
| #793  | 20258   | 21103   | IGHV3-53 | protein_coding | full | 2  | 0 | 1, 2                          |
| #221  | 688465  | 689076  | IGLC7    | protein_coding | full | 1  | 0 | 1                             |
| #1258 | 5853    | 6337    | IGLV3-21 | protein_coding | full | 2  | 0 | 1, 2                          |
| #1258 | 10494   | 12420   | IGLV3-21 | protein_coding | full | 2  | 0 | 1, 2                          |
| #1258 | 1421    | 1881    | IGLV3-9  | protein_coding | full | 2  | 0 | 1, 2                          |
| #19   | 733875  | 7340338 | IL8      | protein_coding | full | 4  | 0 | 1, 2, 3, 4                    |

|       |             |         |          |                |         |    |    |                                                                                             |
|-------|-------------|---------|----------|----------------|---------|----|----|---------------------------------------------------------------------------------------------|
|       | 9           |         |          |                |         |    |    |                                                                                             |
| #19   | 732878<br>2 | 7332034 | IL8      | protein_coding | partial | 4  | 0  | 1, 2, 3, 4 (p)                                                                              |
| #19   | 735592<br>3 | 7358930 | IL8      | protein_coding | full    | 4  | 0  | 1, 2, 3, 4                                                                                  |
| #19   | 732878<br>2 | 7340335 | IL8      | protein_coding | partial | 4  | 0  | 1, 2, 3, 4 (p)                                                                              |
| #19   | 734661<br>9 | 7349535 | IL8      | protein_coding | full    | 4  | 0  | 1, 2, 3, 4                                                                                  |
| #942  | 265         | 5905    | MOG      | protein_coding | full    | 6  | 0  | 1, 2, 3, 4, 5, 6                                                                            |
| #64   | 37635       | 71612   | MUC16    | protein_coding | full    | 15 | 0  | 1, 2, 3, 4, 5, 6, 7, 8, 9, 10,<br>11, 12, 13, 14, 15                                        |
| #220  | 38315       | 38990   | NAT8L    | protein_coding | full    | 1  | 0  | 1                                                                                           |
| #41   | 243753<br>5 | 2452299 | NPL      | protein_coding | partial | 1  | 11 | 1 (e), 2 (e), 3 (e), 4 (e), 5<br>(e), 6 (e), 7 (e), 8 (e), 9<br>(e), 10 (e), 11 (e), 12 (p) |
| #1693 | 1528        | 6511    | olfcd3   | protein_coding | full    | 9  | 0  | 1, 2, 3, 4, 5, 6, 7, 8, 9                                                                   |
| #1169 | 9484        | 16375   | olfcd3   | protein_coding | full    | 7  | 0  | 1, 2, 3, 4, 5, 6, 7                                                                         |
| #1612 | 207         | 4347    | olfcd3   | protein_coding | full    | 7  | 0  | 1, 2, 3, 4, 5, 6, 7                                                                         |
| #1693 | 1322        | 6520    | olfcd3   | protein_coding | full    | 9  | 0  | 1, 2, 3, 4, 5, 6, 7, 8, 9                                                                   |
| #86   | 2077        | 5233    | PTCHD3   | protein_coding | full    | 2  | 0  | 1, 2                                                                                        |
| #232  | 241596      | 247043  | SIGLEC15 | protein_coding | full    | 6  | 0  | 1, 2, 3, 4, 5, 6                                                                            |
| #232  | 220280      | 224506  | SIGLEC15 | protein_coding | full    | 3  | 0  | 1, 2, 3                                                                                     |
| #232  | 220280      | 233979  | SIGLEC15 | protein_coding | full    | 4  | 0  | 1, 2, 3, 4                                                                                  |
| #232  | 165481      | 166798  | SIGLEC15 | protein_coding | full    | 2  | 0  | 1, 2                                                                                        |
| #232  | 241596      | 247055  | SIGLEC15 | protein_coding | full    | 4  | 0  | 1, 2, 3, 4                                                                                  |
| #232  | 250791      | 254708  | SIGLEC15 | protein_coding | full    | 2  | 0  | 1, 2                                                                                        |
| #232  | 243245      | 247057  | SIGLEC15 | protein_coding | full    | 4  | 0  | 1, 2, 3, 4                                                                                  |
| #232  | 220280      | 230895  | SIGLEC15 | protein_coding | full    | 4  | 0  | 1, 2, 3, 4                                                                                  |
| #814  | 3602        | 16893   | SRCRB4D  | protein_coding | full    | 12 | 0  | 1, 2, 3, 4, 5, 6, 7, 8, 9, 10,<br>11, 12                                                    |

|       |         |         |           |                |         |   |   |             |
|-------|---------|---------|-----------|----------------|---------|---|---|-------------|
| #1470 | 0       | 1618    | SSC5D     | protein_coding | full    | 3 | 0 | 1, 2, 3     |
| #7    | 2595095 | 2599855 | TCEB1     | protein_coding | partial | 2 | 1 | 1 (e), 2, 3 |
| #1210 | 16500   | 17461   | TRAV12-2  | protein_coding | full    | 2 | 0 | 1, 2        |
| #1210 | 15106   | 17460   | TRAV12-2  | protein_coding | full    | 2 | 0 | 1, 2        |
| #220  | 591952  | 592327  | TRAV12-3  | protein_coding | full    | 1 | 0 | 1           |
| #408  | 44622   | 50908   | TRAV13-2  | protein_coding | full    | 2 | 0 | 1, 2        |
| #408  | 43240   | 44961   | TRAV13-2  | protein_coding | full    | 2 | 0 | 1, 2        |
| #375  | 142411  | 143235  | TRAV17    | protein_coding | full    | 2 | 0 | 1, 2        |
| #793  | 10036   | 10786   | TRAV17    | protein_coding | full    | 2 | 0 | 1, 2        |
| #663  | 43790   | 44362   | TRAV17    | protein_coding | full    | 2 | 0 | 1, 2        |
| #663  | 42136   | 44407   | TRAV17    | protein_coding | full    | 2 | 0 | 1, 2        |
| #449  | 84188   | 84551   | TRAV18    | protein_coding | full    | 1 | 0 | 1           |
| #375  | 119556  | 125234  | TRAV18    | protein_coding | full    | 4 | 0 | 1, 2, 3, 4  |
| #1392 | 4953    | 14078   | TRAV2     | protein_coding | full    | 4 | 0 | 1, 2, 3, 4  |
| #449  | 77919   | 82579   | TRAV20    | protein_coding | full    | 4 | 0 | 1, 2, 3, 4  |
| #220  | 620191  | 623576  | TRAV20    | protein_coding | full    | 2 | 0 | 1, 2        |
| #220  | 643480  | 648963  | TRAV20    | protein_coding | full    | 4 | 0 | 1, 2, 3, 4  |
| #408  | 105456  | 108636  | TRAV20    | protein_coding | full    | 2 | 0 | 1, 2        |
| #1126 | 12013   | 13125   | TRAV20    | protein_coding | full    | 2 | 0 | 1, 2        |
| #220  | 645455  | 650475  | TRAV20    | protein_coding | full    | 3 | 0 | 1, 2, 3     |
| #1126 | 14045   | 19303   | TRAV20    | protein_coding | full    | 4 | 0 | 1, 2, 3, 4  |
| #1175 | 13295   | 13646   | TRAV20    | protein_coding | full    | 1 | 0 | 1           |
| #449  | 97382   | 99310   | TRAV20    | protein_coding | full    | 3 | 0 | 1, 2, 3     |
| #1126 | 5110    | 5452    | TRAV21    | protein_coding | full    | 1 | 0 | 1           |
| #1382 | 5851    | 6349    | TRAV23DV6 | protein_coding | full    | 1 | 0 | 1           |
| #375  | 129142  | 130985  | TRAV3     | protein_coding | full    | 2 | 0 | 1, 2        |
| #408  | 85892   | 99466   | TRAV36DV7 | protein_coding | full    | 3 | 0 | 1, 2, 3     |
| #408  | 96999   | 101327  | TRAV36DV7 | protein_coding | full    | 4 | 0 | 1, 2, 3, 4  |
| #1155 | 9892    | 15306   | TRAV38-1  | protein_coding | full    | 4 | 0 | 1, 2, 3, 4  |

|       |        |        |             |                |      |   |   |            |
|-------|--------|--------|-------------|----------------|------|---|---|------------|
| #1268 | 11774  | 16862  | TRAV38-1    | protein_coding | full | 3 | 0 | 1, 2, 3    |
| #793  | 3389   | 5490   | TRAV38-1    | protein_coding | full | 2 | 0 | 1, 2       |
| #1352 | 10750  | 14315  | TRAV38-1    | protein_coding | full | 3 | 0 | 1, 2, 3    |
| #1158 | 1173   | 1524   | TRAV38-1    | protein_coding | full | 1 | 0 | 1          |
| #1142 | 1556   | 9873   | TRAV38-1    | protein_coding | full | 3 | 0 | 1, 2, 3    |
| #1268 | 11789  | 12596  | TRAV38-1    | protein_coding | full | 2 | 0 | 1, 2       |
| #1155 | 11807  | 15327  | TRAV38-1    | protein_coding | full | 4 | 0 | 1, 2, 3, 4 |
| #1210 | 22     | 2088   | TRAV38-1    | protein_coding | full | 3 | 0 | 1, 2, 3    |
| #1346 | 8424   | 9325   | TRAV38-2DV8 | protein_coding | full | 2 | 0 | 1, 2       |
| #759  | 13577  | 13925  | TRAV38-2DV8 | protein_coding | full | 1 | 0 | 1          |
| #396  | 30851  | 34098  | TRAV38-2DV8 | protein_coding | full | 3 | 0 | 1, 2, 3    |
| #659  | 19105  | 21243  | TRAV38-2DV8 | protein_coding | full | 3 | 0 | 1, 2, 3    |
| #759  | 15385  | 15673  | TRAV38-2DV8 | protein_coding | full | 1 | 0 | 1          |
| #449  | 67671  | 68282  | TRAV41      | protein_coding | full | 2 | 0 | 1, 2       |
| #408  | 51937  | 52318  | TRAV6       | protein_coding | full | 1 | 0 | 1          |
| #396  | 66263  | 70992  | TRAV8-4     | protein_coding | full | 3 | 0 | 1, 2, 3    |
| #659  | 39636  | 39984  | TRAV9-1     | protein_coding | full | 1 | 0 | 1          |
| #793  | 31393  | 31750  | TRAV9-1     | protein_coding | full | 1 | 0 | 1          |
| #608  | 930    | 2249   | TRBV10-1    | protein_coding | full | 2 | 0 | 1, 2       |
| #1226 | 6285   | 7765   | TRBV6-1     | protein_coding | full | 3 | 0 | 1, 2, 3    |
| #608  | 9256   | 10133  | TRBV6-1     | protein_coding | full | 1 | 0 | 1          |
| #670  | 1947   | 3570   | TRBV6-1     | protein_coding | full | 2 | 0 | 1, 2       |
| #1226 | 10790  | 11576  | TRBV6-1     | protein_coding | full | 2 | 0 | 1, 2       |
| #1226 | 6692   | 8294   | TRBV6-1     | protein_coding | full | 2 | 0 | 1, 2       |
| #1226 | 1632   | 3926   | TRBV6-1     | protein_coding | full | 3 | 0 | 1, 2, 3    |
| #1226 | 11204  | 13957  | TRBV6-1     | protein_coding | full | 3 | 0 | 1, 2, 3    |
| #1226 | 5004   | 5361   | TRBV6-4     | protein_coding | full | 1 | 0 | 1          |
| #220  | 360282 | 360964 | TRDV1       | protein_coding | full | 2 | 0 | 1, 2       |
| #1382 | 13592  | 15075  | TRDV1       | protein_coding | full | 3 | 0 | 1, 2, 3    |
| #1268 | 779    | 5059   | TRDV1       | protein_coding | full | 4 | 0 | 1, 2, 3, 4 |

|       |              |              |        |                |         |   |    |                                                                                   |
|-------|--------------|--------------|--------|----------------|---------|---|----|-----------------------------------------------------------------------------------|
| #923  | 19979        | 23528        | TRDV1  | protein_coding | full    | 3 | 0  | 1, 2, 3                                                                           |
| #1210 | 6346         | 9973         | TRDV1  | protein_coding | full    | 4 | 0  | 1, 2, 3, 4                                                                        |
| #1155 | 5460         | 6159         | TRDV1  | protein_coding | full    | 2 | 0  | 1, 2                                                                              |
| #220  | 258410       | 258774       | TRDV3  | protein_coding | full    | 2 | 0  | 1, 2                                                                              |
| #1479 | 1090         | 5316         | TRDV3  | protein_coding | full    | 4 | 0  | 1, 2, 3, 4                                                                        |
| #220  | 625615       | 634380       | TRDV3  | protein_coding | full    | 4 | 0  | 1, 2, 3, 4                                                                        |
| #220  | 638168       | 638614       | TRDV3  | protein_coding | full    | 1 | 0  | 1                                                                                 |
| #859  | 11020        | 22072        | TRIM60 | protein_coding | full    | 8 | 0  | 1, 2, 3, 4, 5, 6, 7, 8                                                            |
| #325  | 273098       | 274897       | TRIM69 | protein_coding | full    | 4 | 0  | 1, 2, 3, 4                                                                        |
| #7    | 256338<br>7  | 2587471      | UBE2W  | protein_coding | partial | 1 | 4  | 1, 2 (e), 3 (e), 4 (e), 5 (e)                                                     |
| #7    | 255767<br>5  | 2587471      | UBE2W  | protein_coding | partial | 1 | 3  | 1, 2 (e), 3 (e), 4 (e)                                                            |
| #180  | 554351       | 560657       | VCAM1  | protein_coding | full    | 6 | 0  | 1, 2, 3, 4, 5, 6                                                                  |
| #1346 | 1264         | 1594         | -      | protein_coding | full    | 1 | 0  | 1                                                                                 |
| #396  | 88598        | 95985        | -      | protein_coding | partial | 5 | 2  | 1, 2, 3, 4, 5 (p), 6 (e), 7 (e)                                                   |
| #220  | 198469       | 199300       | -      | protein_coding | full    | 2 | 0  | 1, 2                                                                              |
| #1293 | 14321        | 14981        | -      | protein_coding | full    | 2 | 0  | 1, 2                                                                              |
| #620  | 27315        | 35885        | -      | protein_coding | full    | 3 | 0  | 1, 2, 3                                                                           |
| #122  | 196500<br>4  | 1980576      | -      | protein_coding | partial | 3 | 10 | 1 (e), 2 (e), 3 (e), 4 (e), 5 (e), 6 (e), 7 (e), 8 (e), 9 (e), 10 (e), 11, 12, 13 |
| #122  | 196644<br>3  | 1980576      | -      | protein_coding | partial | 1 | 9  | 1 (e), 2 (e), 3 (e), 4 (e), 5 (e), 6 (e), 7 (e), 8 (e), 9 (e), 10                 |
| #1    | 132502<br>26 | 1325270<br>2 | -      | protein_coding | full    | 4 | 0  | 1, 2, 3, 4                                                                        |
| #375  | 161230       | 168071       | -      | protein_coding | full    | 6 | 0  | 1, 2, 3, 4, 5, 6                                                                  |
| #993  | 1128         | 17517        | -      | protein_coding | full    | 6 | 0  | 1, 2, 3, 4, 5, 6                                                                  |
| #670  | 43921        | 45025        | -      | protein_coding | full    | 2 | 0  | 1, 2                                                                              |

|       |              |              |   |                |         |    |    |                                                                                                                                                                               |
|-------|--------------|--------------|---|----------------|---------|----|----|-------------------------------------------------------------------------------------------------------------------------------------------------------------------------------|
| #109  | 251579       | 266923       | - | protein_coding | full    | 13 | 0  | 1, 2, 3, 4, 5, 6, 7, 8, 9, 10, 11, 12, 13                                                                                                                                     |
| #221  | 674694       | 677638       | - | protein_coding | full    | 3  | 0  | 1, 2, 3                                                                                                                                                                       |
| #76   | 244926<br>3  | 2450283      | - | protein_coding | full    | 2  | 0  | 1, 2                                                                                                                                                                          |
| #109  | 252613       | 266923       | - | protein_coding | full    | 13 | 0  | 1, 2, 3, 4, 5, 6, 7, 8, 9, 10, 11, 12, 13                                                                                                                                     |
| #1854 | 51           | 8869         | - | protein_coding | full    | 7  | 0  | 1, 2, 3, 4, 5, 6, 7                                                                                                                                                           |
| #396  | 131318       | 132153       | - | protein_coding | full    | 2  | 0  | 1, 2                                                                                                                                                                          |
| #1002 | 15640        | 18183        | - | protein_coding | full    | 2  | 0  | 1, 2                                                                                                                                                                          |
| #111  | 245558<br>0  | 2455642      | - | miRNA          | full    | 1  | 0  | 1                                                                                                                                                                             |
| #1054 | 14688        | 14743        | - | miRNA          | full    | 1  | 0  | 1                                                                                                                                                                             |
| #76   | 238972<br>1  | 2390829      | - | protein_coding | full    | 2  | 0  | 1, 2                                                                                                                                                                          |
| #915  | 21716        | 25822        | - | protein_coding | full    | 4  | 0  | 1, 2, 3, 4                                                                                                                                                                    |
| #122  | 191536<br>5  | 1985819      | - | protein_coding | partial | 0  | 23 | 1 (e), 2 (e), 3 (e), 4 (e), 5 (e), 6 (e), 7 (e), 8 (e), 9 (e), 10 (e), 11 (e), 12 (e), 13 (e), 14 (e), 15 (e), 16 (e), 17 (e), 18 (e), 19 (e), 20 (e), 21 (e), 22 (e), 23 (e) |
| #1058 | 1963         | 19650        | - | protein_coding | full    | 10 | 0  | 1, 2, 3, 4, 5, 6, 7, 8, 9, 10                                                                                                                                                 |
| #930  | 21359        | 22238        | - | protein_coding | full    | 2  | 0  | 1, 2                                                                                                                                                                          |
| #923  | 2291         | 12944        | - | protein_coding | full    | 4  | 0  | 1, 2, 3, 4                                                                                                                                                                    |
| #1    | 132370<br>11 | 1323995<br>8 | - | protein_coding | full    | 4  | 0  | 1, 2, 3, 4                                                                                                                                                                    |
| #1251 | 4786         | 11122        | - | protein_coding | full    | 4  | 0  | 1, 2, 3, 4                                                                                                                                                                    |
| #608  | 6879         | 7562         | - | protein_coding | full    | 1  | 0  | 1                                                                                                                                                                             |
| #180  | 561935       | 569841       | - | protein_coding | partial | 4  | 2  | 1 (e), 2 (e), 3, 4, 5, 6                                                                                                                                                      |

|       |              |              |   |                |         |    |   |                                      |
|-------|--------------|--------------|---|----------------|---------|----|---|--------------------------------------|
| #76   | 244128<br>6  | 2442206      | - | protein_coding | full    | 2  | 0 | 1, 2                                 |
| #408  | 15163        | 19479        | - | protein_coding | full    | 6  | 0 | 1, 2, 3, 4, 5, 6                     |
| #937  | 16375        | 18581        | - | protein_coding | full    | 2  | 0 | 1, 2                                 |
| #220  | 407749       | 412341       | - | protein_coding | full    | 5  | 0 | 1, 2, 3, 4, 5                        |
| #980  | 8976         | 23135        | - | protein_coding | full    | 11 | 0 | 1, 2, 3, 4, 5, 6, 7, 8, 9, 10,<br>11 |
| #1511 | 6929         | 8705         | - | protein_coding | full    | 5  | 0 | 1, 2, 3, 4, 5                        |
| #76   | 239539<br>9  | 2396082      | - | protein_coding | full    | 2  | 0 | 1, 2                                 |
| #1141 | 18565        | 19150        | - | protein_coding | full    | 2  | 0 | 1, 2                                 |
| #76   | 243139<br>9  | 2433044      | - | protein_coding | full    | 2  | 0 | 1, 2                                 |
| #1121 | 12363        | 17138        | - | protein_coding | full    | 5  | 0 | 1, 2, 3, 4, 5                        |
| #180  | 564407       | 569841       | - | protein_coding | partial | 3  | 2 | 1 (e), 2 (e), 3, 4, 5                |
| #659  | 48016        | 48714        | - | protein_coding | full    | 2  | 0 | 1, 2                                 |
| #1382 | 3257         | 3939         | - | protein_coding | full    | 2  | 0 | 1, 2                                 |
| #1251 | 4750         | 12310        | - | protein_coding | full    | 4  | 0 | 1, 2, 3, 4                           |
| #1377 | 9812         | 12068        | - | protein_coding | full    | 3  | 0 | 1, 2, 3                              |
| #1    | 132453<br>12 | 1325233<br>4 | - | protein_coding | full    | 4  | 0 | 1, 2, 3, 4                           |
| #76   | 239886<br>5  | 2399757      | - | protein_coding | full    | 2  | 0 | 1, 2                                 |
| #220  | 522276       | 530193       | - | protein_coding | partial | 8  | 1 | 1 (e), 2, 3, 4, 5, 6, 7, 8, 9        |
| #759  | 33101        | 33407        | - | protein_coding | full    | 1  | 0 | 1                                    |
| #220  | 502359       | 503235       | - | protein_coding | full    | 2  | 0 | 1, 2                                 |
| #746  | 7738         | 25875        | - | protein_coding | full    | 6  | 0 | 1, 2, 3, 4, 5, 6                     |
| #1080 | 16837        | 18013        | - | protein_coding | full    | 3  | 0 | 1, 2, 3                              |
| #41   | 234459<br>7  | 2345563      | - | protein_coding | full    | 1  | 0 | 1                                    |
| #608  | 3039         | 5404         | - | protein_coding | full    | 3  | 0 | 1, 2, 3                              |

|       |             |         |   |                |         |    |    |                                                                                                                                                               |
|-------|-------------|---------|---|----------------|---------|----|----|---------------------------------------------------------------------------------------------------------------------------------------------------------------|
| #759  | 20731       | 21761   | - | protein_coding | full    | 2  | 0  | 1, 2                                                                                                                                                          |
| #1380 | 14176       | 15507   | - | protein_coding | full    | 2  | 0  | 1, 2                                                                                                                                                          |
| #122  | 191536<br>5 | 1983598 | - | protein_coding | partial | 0  | 21 | 1 (e), 2 (e), 3 (e), 4 (e), 5 (e), 6 (e), 7 (e), 8 (e), 9 (e), 10 (e), 11 (e), 12 (e), 13 (e), 14 (e), 15 (e), 16 (e), 17 (e), 18 (e), 19 (e), 20 (e), 21 (e) |
| #1531 | 2334        | 5388    | - | protein_coding | full    | 2  | 0  | 1, 2                                                                                                                                                          |
| #1055 | 4022        | 5636    | - | protein_coding | full    | 2  | 0  | 1, 2                                                                                                                                                          |
| #109  | 252326      | 266796  | - | protein_coding | full    | 13 | 0  | 1, 2, 3, 4, 5, 6, 7, 8, 9, 10, 11, 12, 13                                                                                                                     |
| #1481 | 8850        | 14414   | - | protein_coding | full    | 8  | 0  | 1, 2, 3, 4, 5, 6, 7, 8                                                                                                                                        |
| #1170 | 2358        | 4795    | - | protein_coding | full    | 2  | 0  | 1, 2                                                                                                                                                          |
| #1121 | 4           | 16987   | - | protein_coding | full    | 11 | 0  | 1, 2, 3, 4, 5, 6, 7, 8, 9, 10, 11                                                                                                                             |
| #290  | 23908       | 25885   | - | protein_coding | full    | 5  | 0  | 1, 2, 3, 4, 5                                                                                                                                                 |
| #1179 | 268         | 18453   | - | protein_coding | full    | 22 | 0  | 1, 2, 3, 4, 5, 6, 7, 8, 9, 10, 11, 12, 13, 14, 15, 16, 17, 18, 19, 20, 21, 22                                                                                 |
| #449  | 48516       | 48975   | - | pseudogene     | full    | 3  | 0  | 1, 2, 3                                                                                                                                                       |
| #76   | 241749<br>8 | 2418429 | - | protein_coding | full    | 2  | 0  | 1, 2                                                                                                                                                          |
| #290  | 157092      | 157950  | - | protein_coding | full    | 2  | 0  | 1, 2                                                                                                                                                          |
| #408  | 118509      | 119397  | - | protein_coding | full    | 2  | 0  | 1, 2                                                                                                                                                          |
| #1055 | 3863        | 18619   | - | protein_coding | full    | 5  | 0  | 1, 2, 3, 4, 5                                                                                                                                                 |
| #1346 | 13151       | 14098   | - | protein_coding | full    | 2  | 0  | 1, 2                                                                                                                                                          |
| #1288 | 31          | 8455    | - | protein_coding | full    | 6  | 0  | 1, 2, 3, 4, 5, 6                                                                                                                                              |
| #937  | 13499       | 14208   | - | protein_coding | full    | 2  | 0  | 1, 2                                                                                                                                                          |
| #1142 | 11290       | 12306   | - | protein_coding | full    | 2  | 0  | 1, 2                                                                                                                                                          |
| #76   | 238464      | 2385606 | - | protein_coding | full    | 3  | 0  | 1, 2, 3                                                                                                                                                       |



|       |              |              |   |                |         |    |    |                                                                                                                                                                           |
|-------|--------------|--------------|---|----------------|---------|----|----|---------------------------------------------------------------------------------------------------------------------------------------------------------------------------|
|       | 7            |              |   |                |         |    |    |                                                                                                                                                                           |
| #325  | 218511       | 219294       | - | protein_coding | full    | 2  | 0  | 1, 2                                                                                                                                                                      |
| #1    | 132453<br>12 | 1324957<br>1 | - | protein_coding | full    | 4  | 0  | 1, 2, 3, 4                                                                                                                                                                |
| #76   | 240949<br>6  | 2410153      | - | protein_coding | full    | 2  | 0  | 1, 2                                                                                                                                                                      |
| #221  | 674694       | 678102       | - | protein_coding | full    | 3  | 0  | 1, 2, 3                                                                                                                                                                   |
| #396  | 137642       | 138100       | - | protein_coding | full    | 2  | 0  | 1, 2                                                                                                                                                                      |
| #76   | 241395<br>3  | 2414837      | - | protein_coding | full    | 2  | 0  | 1, 2                                                                                                                                                                      |
| #1531 | 2432         | 5396         | - | protein_coding | full    | 3  | 0  | 1, 2, 3                                                                                                                                                                   |
| #41   | 236283<br>3  | 2363997      | - | protein_coding | full    | 1  | 0  | 1                                                                                                                                                                         |
| #76   | 237470<br>4  | 2375714      | - | protein_coding | full    | 2  | 0  | 1, 2                                                                                                                                                                      |
| #1088 | 18618        | 19536        | - | protein_coding | full    | 2  | 0  | 1, 2                                                                                                                                                                      |
| #1058 | 1968         | 9056         | - | protein_coding | full    | 6  | 0  | 1, 2, 3, 4, 5, 6                                                                                                                                                          |
| #1664 | 8180         | 9140         | - | protein_coding | full    | 2  | 0  | 1, 2                                                                                                                                                                      |
| #1254 | 3926         | 4868         | - | protein_coding | full    | 1  | 0  | 1                                                                                                                                                                         |
| #670  | 42753        | 45025        | - | protein_coding | full    | 3  | 0  | 1, 2, 3                                                                                                                                                                   |
| #221  | 653935       | 678102       | - | protein_coding | partial | 1  | 2  | 1, 2 (e), 3 (e)                                                                                                                                                           |
| #109  | 246299       | 266796       | - | protein_coding | partial | 12 | 1  | 1 (e), 2, 3, 4, 5, 6, 7, 8, 9, 10, 11, 12, 13                                                                                                                             |
| #923  | 6343         | 7045         | - | protein_coding | full    | 2  | 0  | 1, 2                                                                                                                                                                      |
| #1073 | 11438        | 14611        | - | protein_coding | full    | 3  | 0  | 1, 2, 3                                                                                                                                                                   |
| #109  | 325479       | 516273       | - | protein_coding | partial | 1  | 44 | 1 (e), 2 (e), 3 (e), 4 (e), 5 (e), 6 (e), 7 (e), 8 (e), 9 (e), 10 (e), 11 (e), 12 (e), 13 (e), 14 (e), 15 (e), 16 (e), 17 (e), 18 (e), 19 (e), 20 (e), 21 (e), 22 (e), 23 |

|       |        |        |   |                |      |   |   |                                                                                                                                                                                     |
|-------|--------|--------|---|----------------|------|---|---|-------------------------------------------------------------------------------------------------------------------------------------------------------------------------------------|
|       |        |        |   |                |      |   |   | (e), 24 (e), 25 (e), 26 (e), 27 (e), 28 (e), 29 (e), 30 (e), 31 (e), 32 (e), 33 (e), 34 (e), 35 (e), 36 (e), 37 (e), 38 (e), 39 (e), 40 (e), 41 (e), 42 (e), 43 (e), 44 (e), 45 (p) |
| #746  | 11603  | 25323  | - | protein_coding | full | 4 | 0 | 1, 2, 3, 4                                                                                                                                                                          |
| #1058 | 8      | 19288  | - | protein_coding | full | 6 | 0 | 1, 2, 3, 4, 5, 6                                                                                                                                                                    |
| #670  | 5166   | 7862   | - | protein_coding | full | 3 | 0 | 1, 2, 3                                                                                                                                                                             |
| #1121 | 1      | 17002  | - | protein_coding | full | 7 | 0 | 1, 2, 3, 4, 5, 6, 7                                                                                                                                                                 |
| #1641 | 3560   | 12221  | - | protein_coding | full | 9 | 0 | 1, 2, 3, 4, 5, 6, 7, 8, 9                                                                                                                                                           |
| #375  | 134584 | 135525 | - | protein_coding | full | 2 | 0 | 1, 2                                                                                                                                                                                |

**Supplementary Table II.1 | The average GC content and standard deviation of vertebrate genomes**

These were computed over non-overlapping 3-kb windows.

| <b>Genome</b>        | <b>Average GC content (%)</b> | <b>Standard deviation (%)</b> |
|----------------------|-------------------------------|-------------------------------|
| <i>C. milii</i>      | 42.34                         | 4.47                          |
| Human                | 40.91                         | 6.44                          |
| Chicken              | 41.29                         | 5.64                          |
| Lizard               | 39.90                         | 3.53                          |
| <i>X. tropicalis</i> | 40.06                         | 4.12                          |
| Zebrafish            | 36.60                         | 4.54                          |
| Medaka               | 40.14                         | 3.60                          |
| Stickleback          | 44.53                         | 3.84                          |
| Fugu                 | 45.46                         | 4.23                          |

**Supplementary Table II.2 | Tests of GC compositional homogeneity in *C. milii* genome**

Analysis was carried out for scaffolds > 4 Mb. Kruskal-Wallis tests were carried out on groups of 20-kb windows in 300-kb regions.

| Scaffold | Length     | Average GC (%) | Standard deviation | Kruskal-Wallis Test P-value | Heterogeneous? (P < 0.05) |
|----------|------------|----------------|--------------------|-----------------------------|---------------------------|
| 1        | 18,507,834 | 40.23          | 3.26               | ~0                          | Yes                       |
| 2        | 17,031,706 | 41.04          | 4.57               | ~0                          | Yes                       |
| 3        | 16,461,339 | 39.08          | 3.65               | ~0                          | Yes                       |
| 4        | 16,433,419 | 40.09          | 3.69               | 2.33E-15                    | Yes                       |
| 5        | 15,003,573 | 41.25          | 3.94               | ~0                          | Yes                       |
| 6        | 13,911,802 | 41.06          | 3.60               | ~0                          | Yes                       |
| 7        | 13,485,325 | 38.95          | 3.39               | ~0                          | Yes                       |
| 8        | 12,728,579 | 41.05          | 3.80               | ~0                          | Yes                       |
| 9        | 12,614,711 | 39.78          | 3.65               | ~0                          | Yes                       |
| 10       | 11,909,161 | 42.89          | 3.95               | ~0                          | Yes                       |
| 11       | 11,573,033 | 40.27          | 3.57               | 6.02E-05                    | Yes                       |
| 12       | 11,530,728 | 40.22          | 3.80               | ~0                          | Yes                       |
| 13       | 10,529,718 | 41.21          | 3.51               | 7.59E-11                    | Yes                       |
| 14       | 9,996,151  | 39.25          | 3.06               | 7.24E-09                    | Yes                       |
| 15       | 9,908,685  | 43.68          | 3.54               | ~0                          | Yes                       |
| 16       | 9,849,519  | 40.76          | 3.98               | ~0                          | Yes                       |
| 17       | 9,843,783  | 41.14          | 3.84               | ~0                          | Yes                       |
| 18       | 9,630,976  | 42.56          | 3.70               | ~0                          | Yes                       |
| 19       | 9,386,079  | 41.23          | 3.55               | 1.21E-08                    | Yes                       |
| 20       | 9,228,010  | 40.00          | 3.58               | 0.012267                    | Yes                       |
| 21       | 9,046,933  | 41.66          | 3.81               | 0.00172                     | Yes                       |
| 22       | 8,947,343  | 40.79          | 3.70               | 0.005888                    | Yes                       |
| 23       | 8,803,159  | 41.23          | 3.82               | 3.64E-13                    | Yes                       |
| 24       | 8,332,076  | 41.23          | 3.43               | 0.063744                    | No                        |
| 25       | 8,056,818  | 40.18          | 3.66               | 0.083315                    | No                        |
| 26       | 7,764,900  | 40.51          | 3.75               | 0.150473                    | No                        |
| 27       | 7,641,004  | 40.18          | 3.60               | 1.08E-06                    | Yes                       |
| 28       | 7,535,631  | 40.83          | 3.92               | ~0                          | Yes                       |
| 29       | 7,318,916  | 40.09          | 4.21               | ~0                          | Yes                       |
| 30       | 6,964,137  | 41.83          | 3.68               | ~0                          | Yes                       |
| 31       | 6,938,060  | 41.03          | 3.54               | 0.004917                    | Yes                       |
| 32       | 6,832,876  | 42.05          | 3.19               | 1.24E-14                    | Yes                       |
| 33       | 6,506,902  | 42.38          | 3.80               | 4.89E-13                    | Yes                       |
| 34       | 6,463,314  | 41.27          | 3.67               | 0.000351                    | Yes                       |
| 35       | 6,429,418  | 41.01          | 3.73               | 2.64E-06                    | Yes                       |
| 36       | 6,301,995  | 44.15          | 3.80               | 2.23E-10                    | Yes                       |
| 37       | 5,873,764  | 44.65          | 4.13               | 0.004666                    | Yes                       |
| 38       | 5,469,490  | 40.79          | 3.83               | 4.36E-10                    | Yes                       |
| 39       | 5,419,759  | 38.80          | 2.97               | 0.00365                     | Yes                       |
| 40       | 5,379,800  | 40.41          | 3.54               | 4.71E-05                    | Yes                       |

|              |           |       |      |          |                 |
|--------------|-----------|-------|------|----------|-----------------|
| 41           | 5,334,932 | 41.25 | 3.41 | ~0       | Yes             |
| 42           | 5,298,526 | 40.96 | 3.33 | 9.31E-13 | Yes             |
| 43           | 5,220,276 | 40.47 | 3.43 | 8.12E-07 | Yes             |
| 44           | 5,213,970 | 44.60 | 3.76 | 6.21E-08 | Yes             |
| 45           | 5,104,675 | 41.30 | 4.49 | ~0       | Yes             |
| 46           | 5,087,354 | 42.25 | 4.09 | ~0       | Yes             |
| 47           | 5,048,387 | 45.00 | 4.65 | 0.049969 | Yes             |
| 48           | 4,929,752 | 41.51 | 3.55 | 2.48E-11 | Yes             |
| 49           | 4,897,056 | 43.16 | 3.55 | 4.63E-09 | Yes             |
| 50           | 4,875,586 | 40.33 | 3.41 | 0.03009  | Yes             |
| 51           | 4,861,936 | 40.60 | 3.71 | 0.391851 | No              |
| 52           | 4,822,577 | 42.21 | 3.34 | 4E-07    | Yes             |
| 53           | 4,771,929 | 42.10 | 3.59 | 3.16E-10 | Yes             |
| 54           | 4,751,830 | 40.48 | 3.97 | 5.93E-07 | Yes             |
| 55           | 4,608,585 | 40.69 | 3.55 | 0.048503 | Yes             |
| 56           | 4,596,003 | 40.46 | 3.65 | 0.004326 | Yes             |
| 57           | 4,591,479 | 41.38 | 3.41 | 6.02E-08 | Yes             |
| 58           | 4,569,021 | 45.19 | 3.80 | 0.012924 | Yes             |
| 59           | 4,564,766 | 43.31 | 3.46 | 7.67E-08 | Yes             |
| 60           | 4,521,921 | 41.47 | 3.70 | 0.337046 | No              |
| 61           | 4,508,736 | 42.64 | 4.38 | ~0       | Yes             |
| 62           | 4,467,497 | 41.23 | 3.52 | 0.079865 | No              |
| 63           | 4,339,253 | 43.21 | 3.91 | 3.36E-10 | Yes             |
| 64           | 4,326,226 | 45.52 | 3.96 | 0.011714 | Yes             |
| 65           | 4,283,084 | 42.37 | 3.01 | 0.002259 | Yes             |
| 66           | 4,241,200 | 41.42 | 4.07 | 4.01E-09 | Yes             |
| 67           | 4,186,129 | 40.40 | 3.40 | 0.36032  | No              |
| 68           | 4,157,550 | 40.17 | 3.58 | 0.068569 | No              |
| 69           | 4,147,603 | 40.56 | 3.48 | 0.03411  | Yes             |
| 70           | 4,034,929 | 45.59 | 4.28 | 0.074826 | No              |
| <b>Total</b> |           |       |      |          | <b>61 'Yes'</b> |

**Supplementary Table II.3 | Summary of isochores in *C. milii* genome**  
(the largest 70 scaffolds; total 532.0 Mb)

| Scaffold | No. of isochores | No. of isochores >300kb | Isochores >300 kb and homogeneous |                  |                            |
|----------|------------------|-------------------------|-----------------------------------|------------------|----------------------------|
|          |                  |                         | Number                            | Avg. length (kb) | Percentage of the scaffold |
| 1        | 59               | 14                      | 7                                 | 1,698            | 64%                        |
| 2        | 31               | 14                      | 12                                | 1,150            | 81%                        |
| 3        | 62               | 17                      | 15                                | 928              | 85%                        |
| 4        | 123              | 15                      | 5                                 | 779              | 24%                        |
| 5        | 43               | 15                      | 10                                | 1,083            | 72%                        |
| 6        | 6                | 5                       | 2                                 | 4,044            | 58%                        |
| 7        | 39               | 11                      | 7                                 | 1,282            | 67%                        |
| 8        | 7                | 6                       | 4                                 | 2,931            | 92%                        |
| 9        | 66               | 14                      | 6                                 | 745              | 35%                        |
| 10       | 13               | 9                       | 4                                 | 2,194            | 74%                        |
| 11       | 79               | 13                      | 5                                 | 739              | 32%                        |
| 12       | 41               | 15                      | 10                                | 696              | 60%                        |
| 13       | 53               | 17                      | 3                                 | 505              | 14%                        |
| 14       | 61               | 13                      | 6                                 | 634              | 38%                        |
| 15       | 17               | 9                       | 3                                 | 907              | 27%                        |
| 16       | 38               | 11                      | 5                                 | 1,205            | 61%                        |
| 17       | 38               | 13                      | 8                                 | 705              | 57%                        |
| 18       | 42               | 5                       | 3                                 | 2,212            | 69%                        |
| 19       | 10               | 6                       | 2                                 | 1743             | 37%                        |
| 20       | 81               | 8                       | 2                                 | 512              | 11%                        |
| 21       | 97               | 9                       | 3                                 | 484              | 16%                        |
| 22       | 105              | 10                      | 4                                 | 399              | 18%                        |
| 23       | 60               | 12                      | 6                                 | 494              | 34%                        |
| 24       | 75               | 9                       | 4                                 | 600              | 29%                        |
| 25       | 72               | 5                       | 2                                 | 374              | 9%                         |
| 26       | 74               | 8                       | 1                                 | 414              | 5%                         |
| 27       | 53               | 8                       | 4                                 | 776              | 41%                        |
| 28       | 22               | 9                       | 9                                 | 790              | 94%                        |
| 29       | 130              | 3                       | 3                                 | 985              | 40%                        |
| 30       | 20               | 7                       | 4                                 | 962              | 55%                        |
| 31       | 87               | 2                       | 0                                 | 0                | 0%                         |
| 32       | 34               | 5                       | 2                                 | 1,517            | 44%                        |
| 33       | 14               | 5                       | 3                                 | 1,507            | 69%                        |
| 34       | 5                | 4                       | 2                                 | 1,646            | 51%                        |
| 35       | 23               | 9                       | 4                                 | 822              | 51%                        |
| 36       | 74               | 5                       | 4                                 | 393              | 25%                        |

|              |              |            |            |               |              |
|--------------|--------------|------------|------------|---------------|--------------|
| 37           | 12           | 5          | 3          | 964           | 49%          |
| 38           | 23           | 4          | 3          | 994           | 55%          |
| 39           | 29           | 5          | 2          | 792           | 29%          |
| 40           | 67           | 4          | 1          | 552           | 10%          |
| 41           | 8            | 3          | 2          | 2,054         | 77%          |
| 42           | 29           | 6          | 3          | 786           | 45%          |
| 43           | 29           | 5          | 2          | 686           | 26%          |
| 44           | 10           | 4          | 1          | 3,798         | 73%          |
| 45           | 49           | 4          | 2          | 1,386         | 54%          |
| 46           | 22           | 5          | 4          | 848           | 67%          |
| 47           | 27           | 6          | 6          | 499           | 59%          |
| 48           | 46           | 4          | 2          | 750           | 30%          |
| 49           | 12           | 5          | 4          | 712           | 58%          |
| 50           | 74           | 4          | 3          | 503           | 31%          |
| 51           | 87           | 2          | 2          | 401           | 16%          |
| 52           | 38           | 6          | 3          | 468           | 29%          |
| 53           | 45           | 7          | 3          | 489           | 31%          |
| 54           | 43           | 5          | 2          | 809           | 34%          |
| 55           | 49           | 6          | 2          | 404           | 18%          |
| 56           | 49           | 6          | 2          | 491           | 21%          |
| 57           | 29           | 5          | 2          | 740           | 32%          |
| 58           | 16           | 2          | 1          | 3,357         | 73%          |
| 59           | 27           | 7          | 3          | 795           | 52%          |
| 60           | 40           | 4          | 0          | 0             | 0%           |
| 61           | 2            | 2          | 2          | 2,253         | 100%         |
| 62           | 2            | 1          | 0          | 0             | 0%           |
| 63           | 4            | 4          | 2          | 1,106         | 51%          |
| 64           | 76           | 1          | 1          | 2,955         | 68%          |
| 65           | 16           | 4          | 1          | 612           | 14%          |
| 66           | 49           | 4          | 3          | 677           | 48%          |
| 67           | 32           | 4          | 2          | 515           | 25%          |
| 68           | 216          | 1          | 1          | 390           | 9%           |
| 69           | 61           | 3          | 1          | 708           | 17%          |
| 70           | 41           | 1          | 1          | 792           | 20%          |
| <b>Total</b> | <b>3,213</b> | <b>479</b> | <b>246</b> | <b>993.24</b> | <b>45.9%</b> |

**Supplementary Table II.4 | Descriptive statistics of isochores in lizard, *C. milii* and stickleback.**

|                                  |                 | Isochore families |         |         |
|----------------------------------|-----------------|-------------------|---------|---------|
|                                  |                 | L2                | H1      | H2      |
| No. of isochores                 | <i>C. milii</i> | 195               | 49      | 2       |
|                                  | Lizard          | 467               | 3       | -       |
|                                  | Stickleback     | -                 | 60      | 11      |
| Average GC content (%)           | <i>C. milii</i> | 39.9              | 43.0    | 44.4    |
|                                  | Lizard          | 39.4              | 42.5    | -       |
|                                  | Stickleback     | -                 | 43.4    | 45.8    |
| Average size of isochore (kb)    | <i>C. milii</i> | 917.5             | 1,243.9 | 2,233.5 |
|                                  | Lizard          | 496.3             | 1,137.0 | -       |
|                                  | Stickleback     | -                 | 3,588.1 | 1,554.5 |
| Percentage of isochoric sequence | <i>C. milii</i> | 73.2              | 25.0    | 1.8     |
|                                  | Lizard          | 98.5              | 1.5     | -       |
|                                  | Stickleback     | -                 | 92.6    | 7.4     |



**Supplementary Table II.5 | Gene density of isochores in *C. milii*, lizard and stickleback,**  
(measured as percentage of isochoric sequence that falls within protein-coding genes).

| Species \<br>isochore<br>family | Isochoric sequence (kb) |         |        | Genic sequence (kb) |        |       | Gene density (%) |      |      |
|---------------------------------|-------------------------|---------|--------|---------------------|--------|-------|------------------|------|------|
|                                 | L2                      | H1      | H2     | L2                  | H1     | H2    | L2               | H1   | H2   |
| <i>C. milii</i>                 | 178,920                 | 60,951  | 4,467  | 85,703              | 31,006 | 1,527 | 47.9             | 50.9 | 34.2 |
| Lizard                          | 231,762                 | 3,411   | -      | 53,190              | 982    | -     | 23.0             | 28.8 | -    |
| Stickleback                     | -                       | 215,286 | 17,100 | -                   | 92,786 | 7,032 | -                | 43.1 | 41.1 |

**Supplementary Table III.7 | miRNA families present in elephant shark, mouse and human but lost in teleost fishes.**

| Sl.number | microRNA family | Function                   | Zebrafish | Stickleback       | Fugu              |
|-----------|-----------------|----------------------------|-----------|-------------------|-------------------|
| 1         | mir-28          | unknown                    | Absent    | Absent            | Absent            |
| 2         | mir-32          | anti-viral                 | Absent    | Absent            | Absent            |
| 3         | mir-33          | cholesterol metabolism     | Absent    | Present in Genome | Present in Genome |
| 4         | mir-147         | inflammation response      | Absent    | Absent            | Absent            |
| 5         | mir-149         | unknown                    | Absent    | Absent            | Absent            |
| 6         | mir-150         | B-cell development         | Absent    | Absent            | Absent            |
| 7         | mir-154         | unknown                    | Absent    | Absent            | Absent            |
| 8         | mir-191         | cancer associated          | Absent    | Absent            | Absent            |
| 9         | mir-290         | autophagy related          | Absent    | Absent            | Absent            |
| 10        | mir-378         | cell survival              | Absent    | Absent            | Absent            |
| 11        | mir-425         | unknown                    | Absent    | Absent            | Absent            |
| 12        | mir-449         | testis development         | Absent    | Absent            | Absent            |
| 13        | mir-467         | unknown                    | Absent    | Absent            | Absent            |
| 14        | mir-506         | unknown                    | Absent    | Absent            | Absent            |
| 15        | mir-551         | unknown                    | Absent    | Absent            | Absent            |
| 16        | mir-653         | unknown                    | Absent    | Absent            | Absent            |
| 17        | mir-676         | unknown                    | Absent    | Absent            | Absent            |
| 18        | mir-744         | TGFBeta-1 regulation       | Absent    | Absent            | Absent            |
| 19        | mir-764         | osteoblast differentiation | Absent    | Absent            | Absent            |
| 20        | mir-873         | unknown                    | Absent    | Absent            | Absent            |
| 21        | mir-875         | unknown                    | Absent    | Absent            | Absent            |
| 22        | mir-1247        | unknown                    | Absent    | Absent            | Absent            |

**Supplementary Table IV.2 | Overlap of human orthologous gCNEs with known functional elements in the human genome**

| Type of functional elements                   | Percentage of observed overlaps (gCNEs) | Percentage of expected overlaps (random noncoding regions) | Fold enrichment | p-value  |
|-----------------------------------------------|-----------------------------------------|------------------------------------------------------------|-----------------|----------|
| p300-binding sites (Visel et al. 2009)        | 3.94%                                   | 0.33%                                                      | 12x             | < 1e-200 |
| Transcriptional enhancers (Visel et al. 2007) | 3.01%                                   | 0.14%                                                      | 22x             | < 1e-200 |

**Supplementary Table IV.3 | GeneOntology enrichment (molecular function section) of human genes associated with pan-gnathostome CNEs.**

The top 20 GO terms with p-value < 0.05 are shown.

| No. | GO term                                                                                                                                                      | Genes in genome | Genes associated with pan-gnathostome CNEs |          | p-value  |
|-----|--------------------------------------------------------------------------------------------------------------------------------------------------------------|-----------------|--------------------------------------------|----------|----------|
|     |                                                                                                                                                              |                 | Observed                                   | Expected |          |
| 1   | sequence-specific DNA binding                                                                                                                                | 721             | 99                                         | 22.49    | 1.70E-27 |
| 2   | sequence-specific DNA binding transcription factor activity                                                                                                  | 1024            | 117                                        | 31.94    | 8.60E-25 |
| 3   | RNA polymerase II distal enhancer sequence-specific DNA binding transcription factor activity                                                                | 99              | 17                                         | 3.09     | 1.00E-08 |
| 4   | chromatin binding                                                                                                                                            | 260             | 25                                         | 8.11     | 5.70E-07 |
| 5   | enhancer sequence-specific DNA binding                                                                                                                       | 17              | 7                                          | 0.53     | 3.20E-06 |
| 6   | RNA polymerase II core promoter proximal region sequence-specific DNA binding transcription factor activity involved in positive regulation of transcription | 42              | 9                                          | 1.31     | 4.60E-06 |
| 7   | protein heterodimerization activity                                                                                                                          | 302             | 25                                         | 9.42     | 9.60E-06 |
| 8   | double-stranded DNA binding                                                                                                                                  | 155             | 15                                         | 4.83     | 9.00E-05 |
| 9   | RNA polymerase II core promoter proximal region sequence-specific DNA binding                                                                                | 11              | 4                                          | 0.34     | 2.60E-04 |
| 10  | RNA polymerase II transcription coactivator activity                                                                                                         | 11              | 4                                          | 0.34     | 2.60E-04 |
| 11  | DNA binding, bending                                                                                                                                         | 56              | 8                                          | 1.75     | 3.20E-04 |
| 12  | protein homodimerization activity                                                                                                                            | 512             | 31                                         | 15.97    | 3.50E-04 |
| 13  | steroid hormone receptor activity                                                                                                                            | 57              | 8                                          | 1.78     | 3.70E-04 |
| 14  | RNA polymerase II core promoter sequence-specific DNA binding transcription factor activity                                                                  | 6               | 3                                          | 0.19     | 5.60E-04 |
| 15  | DNA binding                                                                                                                                                  | 2390            | 167                                        | 74.55    | 6.00E-04 |
| 16  | nucleic acid binding transcription factor activity                                                                                                           | 1026            | 119                                        | 32       | 6.70E-04 |
| 17  | RNA polymerase II core promoter sequence-specific DNA binding                                                                                                | 14              | 4                                          | 0.44     | 7.30E-04 |
| 18  | transcription corepressor activity                                                                                                                           | 169             | 16                                         | 5.27     | 1.39E-03 |
| 19  | core promoter proximal region                                                                                                                                | 20              | 7                                          | 0.62     | 2.16E-03 |

|    |                               |   |   |      |          |
|----|-------------------------------|---|---|------|----------|
|    | sequence-specific DNA binding |   |   |      |          |
| 20 | glutamate binding             | 9 | 3 | 0.28 | 2.20E-03 |

**Supplementary Table IV.4 | GeneOntology enrichment (biological process section) of human genes associated with pan-gnathostome CNEs.**

The top 20 GO terms with p-value < 0.05 are shown.

| No. | GO term                                                              | Genes in genome | Genes associated with pan-gnathostome CNEs |          | p-value  |
|-----|----------------------------------------------------------------------|-----------------|--------------------------------------------|----------|----------|
|     |                                                                      |                 | Observed                                   | Expected |          |
| 1   | positive regulation of transcription from RNA polymerase II promoter | 618             | 66                                         | 19.8     | 3.40E-17 |
| 2   | negative regulation of transcription from RNA polymerase II promoter | 432             | 52                                         | 13.84    | 1.60E-15 |
| 3   | negative regulation of neuron differentiation                        | 54              | 15                                         | 1.73     | 4.30E-10 |
| 4   | positive regulation of neuron differentiation                        | 63              | 15                                         | 2.02     | 9.30E-10 |
| 5   | dorsal spinal cord development                                       | 21              | 10                                         | 0.67     | 6.30E-07 |
| 6   | forebrain development                                                | 267             | 44                                         | 8.56     | 1.70E-06 |
| 7   | neural tube closure                                                  | 66              | 12                                         | 2.11     | 3.30E-06 |
| 8   | embryonic hindlimb morphogenesis                                     | 31              | 8                                          | 0.99     | 4.30E-06 |
| 9   | metanephros development                                              | 76              | 15                                         | 2.44     | 6.60E-06 |
| 10  | positive regulation of osteoblast differentiation                    | 43              | 9                                          | 1.38     | 7.10E-06 |
| 11  | camera-type eye development                                          | 232             | 31                                         | 7.43     | 7.10E-06 |
| 12  | negative regulation of smoothed signaling pathway                    | 17              | 6                                          | 0.54     | 9.60E-06 |
| 13  | regulation of transcription, DNA-dependent                           | 2996            | 191                                        | 96       | 1.30E-05 |
| 14  | trigeminal nerve development                                         | 6               | 4                                          | 0.19     | 1.50E-05 |
| 15  | lens induction in camera-type eye                                    | 6               | 4                                          | 0.19     | 1.50E-05 |
| 16  | pituitary gland development                                          | 44              | 11                                         | 1.41     | 1.60E-05 |
| 17  | embryonic digestive tract morphogenesis                              | 19              | 6                                          | 0.61     | 2.00E-05 |
| 18  | positive regulation of cartilage development                         | 12              | 5                                          | 0.38     | 2.20E-05 |
| 19  | anterior/posterior axis specification                                | 41              | 7                                          | 1.31     | 3.40E-05 |
| 20  | neuron fate commitment                                               | 56              | 16                                         | 1.79     | 4.60E-05 |

**Supplementary Table IV.5 | Top 20 human genes with the highest number of pan-gnathostome CNEs**

| No. | Gene            | No. of pan-gnathostome CNEs | Name       | Description                                     |
|-----|-----------------|-----------------------------|------------|-------------------------------------------------|
| 1   | ENSG00000108001 | 42                          | EBF3       | early B-cell factor 3                           |
| 2   | ENSG00000143032 | 28                          | BARHL2     | BarH-like homeobox 2                            |
| 3   | ENSG00000121297 | 21                          | TSHZ3      | teashirt zinc finger homeobox 3                 |
| 4   | ENSG00000148655 | 20                          | C10orf11   | chromosome 10 open reading frame 11             |
| 5   | ENSG00000114861 | 19                          | FOXP1      | forkhead box P1                                 |
| 6   | ENSG00000175745 | 17                          | NR2F1      | nuclear receptor subfamily 2, group F, member 1 |
| 7   | ENSG00000205148 | 16                          | AC016251.1 | Uncharacterized protein                         |
| 8   | ENSG00000165659 | 16                          | DACH1      | dachshund homolog 1 (Drosophila)                |
| 9   | ENSG00000185594 | 16                          | SPATA8     | spermatogenesis associated 8                    |
| 10  | ENSG00000170549 | 15                          | IRX1       | iroquois homeobox 1                             |
| 11  | ENSG00000153234 | 15                          | NR4A2      | nuclear receptor subfamily 4, group A, member 2 |
| 12  | ENSG00000091656 | 15                          | ZFHX4      | zinc finger homeobox 4                          |
| 13  | ENSG00000169946 | 15                          | ZFPM2      | zinc finger protein, multitype 2                |
| 14  | ENSG00000176842 | 14                          | IRX5       | iroquois homeobox 5                             |
| 15  | ENSG00000181355 | 14                          | OFCC1      | orofacial cleft 1 candidate 1                   |
| 16  | ENSG00000167081 | 14                          | PBX3       | pre-B-cell leukemia homeobox 3                  |
| 17  | ENSG00000256463 | 14                          | SALL3      | sal-like 3 (Drosophila)                         |
| 18  | ENSG00000164651 | 14                          | SP8        | Sp8 transcription factor                        |
| 19  | ENSG00000170430 | 13                          | MGMT       | O-6-methylguanine-DNA methyltransferase         |
| 20  | ENSG00000075891 | 13                          | PAX2       | paired box 2                                    |

**Supplementary Table IV.6 | Top 20 *C. milii* genes with the highest number of gCNEs lost in teleosts**

| No. | Gene               | No. of associated gCNEs | No. of gCNEs lost in teleosts | Name   | Description                                                                             | Is gene detected in teleosts? |
|-----|--------------------|-------------------------|-------------------------------|--------|-----------------------------------------------------------------------------------------|-------------------------------|
| 1   | SINCAMG00000005569 | 94                      | 91                            | ZNF608 | zinc finger protein 608 [Homo sapiens]                                                  | detected                      |
| 2   | SINCAMG00000008354 | 118                     | 81                            | LPHN2  | latrophilin 2 [Homo sapiens]                                                            | detected                      |
| 3   | SINCAMG00000007237 | 179                     | 76                            | nr2f2  | nuclear receptor subfamily 2, group F, member 2 [Danio rerio]                           | detected                      |
| 4   | SINCAMG00000016163 | 104                     | 71                            | RBFOX1 | RNA binding protein, fox-1 homolog ( <i>C. elegans</i> ) 1 [Homo sapiens]               | detected                      |
| 5   | SINCAMG00000012383 | 131                     | 65                            | MGMT   | O-6-methylguanine-DNA methyltransferase [Xenopus tropicalis]                            | detected                      |
| 6   | SINCAMG00000013188 | 121                     | 62                            | ZEB2   | zinc finger E-box binding homeobox 2 [Homo sapiens]                                     | detected                      |
| 7   | SINCAMG00000010227 | 93                      | 57                            | EBF1   | early B-cell factor 1 [Homo sapiens]                                                    | not_detected                  |
| 8   | SINCAMG00000012676 | 126                     | 55                            | NR2F1  | nuclear receptor subfamily 2, group F, member 1 [Homo sapiens]                          | detected                      |
| 9   | SINCAMG00000015450 | 127                     | 53                            | IRX1   | iroquois homeobox 1 [Xenopus tropicalis]                                                | detected                      |
| 10  | SINCAMG00000000087 | 61                      | 52                            | TLE1   | transducin-like enhancer of split 1 (E(sp1) homolog, <i>Drosophila</i> ) [Homo sapiens] | detected                      |
| 11  | SINCAMG00000015913 | 72                      | 51                            | MECOM  | MDS1 and EVI1 complex locus [Homo sapiens]                                              | detected                      |
| 12  | SINCAMG00000004616 | 117                     | 49                            | irx3a  | iroquois homeobox protein 3a [Danio rerio]                                              | detected                      |
| 13  | SINCAMG00000006831 | 110                     | 49                            | ZFHX4  | zinc finger homeobox 4 [Xenopus tropicalis]                                             | detected                      |



|    |                    |     |    |         |                                                      |          |
|----|--------------------|-----|----|---------|------------------------------------------------------|----------|
| 14 | SINCAMG00000004420 | 90  | 47 | DACH1   | dachshund homolog 1 (Drosophila) [Homo sapiens]      | detected |
| 15 | SINCAMG00000003683 | 67  | 46 | C16orf7 | chromosome 16 open reading frame 7 [Homo sapiens]    | detected |
| 16 | SINCAMG00000013602 | 62  | 46 | EFNA5   | ephrin-A5 [Xenopus tropicalis]                       | detected |
| 17 | SINCAMG00000003023 | 72  | 45 | WWOX    | WW domain-containing oxidoreductase [Gallus gallus]  | detected |
| 18 | SINCAMG00000003179 | 82  | 44 | ESRRG   | estrogen-related receptor gamma [Xenopus tropicalis] | detected |
| 19 | SINCAMG00000004484 | 100 | 42 | TSHZ3   | teashirt zinc finger homeobox 3 [Homo sapiens]       | detected |
| 20 | SINCAMG00000004614 | 59  | 42 | FTO     | FTO isoform 1 Fragment [Meleagris gallopavo]         | detected |

Supplementary Table IV.7 | Top 20 *C. milii* genes with the highest number of gCNEs lost in tetrapods

| No. | Gene               | No. of associated gCNEs | No. of gCNEs lost in tetrapods | Name          | Description                                                   | Is gene detected in tetrapods? |
|-----|--------------------|-------------------------|--------------------------------|---------------|---------------------------------------------------------------|--------------------------------|
| 1   | SINCAMG00000007832 | 43                      | 19                             | CASZ1         | castor zinc finger 1 [Homo sapiens]                           | detected                       |
| 2   | SINCAMG00000017450 | 38                      | 11                             | -             | uncharacterized protein                                       | not_detected                   |
| 3   | SINCAMG00000008909 | 18                      | 9                              | FNDC7         | fibronectin type III domain containing 7 [Homo sapiens]       | not_detected                   |
| 4   | SINCAMG00000015450 | 127                     | 8                              | IRX1          | iroquois homeobox 1 [Xenopus tropicalis]                      | detected                       |
| 5   | SINCAMG00000016474 | 16                      | 8                              | CHST3-like    | carbohydrate sulfotransferase 3-like [Xenopus tropicalis]     | detected                       |
| 6   | SINCAMG00000011290 | 22                      | 7                              | HERC1         | hect domain and RCC1-like domain 1 [Bos taurus]               | not_detected                   |
| 7   | SINCAMG00000006768 | 42                      | 6                              | FBRSL1        | fibrosin-like 1 [Homo sapiens]                                | detected                       |
| 8   | SINCAMG00000017287 | 11                      | 6                              | -             | uncharacterized protein                                       | not_detected                   |
| 9   | SINCAMG00000007237 | 179                     | 5                              | nr2f2         | nuclear receptor subfamily 2, group F, member 2 [Danio rerio] | detected                       |
| 10  | SINCAMG00000011467 | 30                      | 5                              | ATP8B2        | ATPase, class I, type 8B, member 2 [Homo sapiens]             | detected                       |
| 11  | SINCAMG00000006880 | 27                      | 5                              | B0YN98_CALM I | Protocadherin nu1 [Source:UniProtKB/TrEMBL;Acc:B0YN85]        | detected                       |
| 12  | SINCAMG00000016478 | 22                      | 5                              | CUEDC2        | CUE domain containing 2 [Homo sapiens]                        | detected                       |
| 13  | SINCAMG00000009005 | 16                      | 5                              | PAX1          | paired box 1 [Xenopus tropicalis]                             | detected                       |
| 14  | SINCAMG00000004468 | 16                      | 5                              | -             | si:dkey-22o22.2 [Danio rerio]                                 | detected                       |
| 15  | SINCAMG00000005907 | 11                      | 5                              | IGFALS        | insulin-like growth factor-binding protein                    | detected                       |

|    |                    |     |   |          |                                                                                |              |
|----|--------------------|-----|---|----------|--------------------------------------------------------------------------------|--------------|
|    |                    |     |   |          | complex acid labile subunit [Bos taurus]                                       |              |
| 16 | SINCAMG00000004617 | 128 | 4 | IRX5     | iroquois homeobox 5 [Xenopus tropicalis]                                       | not_detected |
| 17 | SINCAMG00000006156 | 71  | 4 | C15orf41 | chromosome 15 open reading frame 41 [Homo sapiens]                             | detected     |
| 18 | SINCAMG00000001847 | 41  | 4 | LRBA     | LPS-responsive vesicle trafficking, beach and anchor containing [Homo sapiens] | detected     |
| 19 | SINCAMG00000006817 | 37  | 4 | HNF4G    | hepatocyte nuclear factor 4, gamma [Homo sapiens]                              | detected     |
| 20 | SINCAMG00000000509 | 29  | 4 | dnah9l   | dynein, axonemal, heavy polypeptide 9 like [Danio rerio]                       | detected     |

**Supplementary Table V.1 | Evaluation of alternate topologies for the 13-chordate dataset using CONSEL.**

Three selected topologies were evaluated using several tests as implemented in the program CONSEL. A concatenated peptide alignment of 699 one-to-one core orthologs was used for topology testing. The tests used are: approximately unbiased test (AU), bootstrap probability (NP, BP), Bayesian posterior probability (PP), Kishino-Hasegawa test (KH), Shimodaira-Hasegawa test (SH), weighted KH test (wKH) and weighted SH test (wSH). *p*-values derived from these tests for the various topologies are shown (higher is better). All the tests ranked “Chondrichthyes sister to bony vertebrates” (C,(Tel,(Lc,Tet))) as the most likely topology. This congruence in the top-ranked topology between different tests is a strong support for this topology. This topology was also inferred by phylogenetic analysis using Maximum likelihood and Bayesian inference methods.

| Rank | Topology            | AU    | NP    | BP    | PP    | KH    | SH    | wKH   | wSH   |
|------|---------------------|-------|-------|-------|-------|-------|-------|-------|-------|
| 1    | (C,(A,(Lc,Tet)))    | 0.972 | 0.970 | 0.967 | 1.000 | 0.971 | 0.994 | 0.971 | 0.997 |
| 2    | (A,(C,(Lc,Tet)))    | 0.028 | 0.030 | 0.033 | 1e-73 | 0.029 | 0.122 | 0.029 | 0.073 |
| 3    | ((((C,Tel),Lc),Tet) | 4e-37 | 6e-15 | 0     | 0     | 0     | 0     | 0     | 0     |
| 4    | ((((C,Lc),Tel),Tet) | 9e-43 | 8e-16 | 0     | 0     | 0     | 0     | 0     | 0     |
| 5    | ((C,(Lc,Tel)),Tet)  | 1e-74 | 2e-20 | 0     | 0     | 0     | 0     | 0     | 0     |

C, Chondrichthyes (*C. milii*); Tet, tetrapods; Tel, teleosts; Lc, coelacanth; A, Actinopterygii (stickleback and zebrafish)

**Supplementary Table VI.1 | Relative rate tests of *C. milii* versus the other vertebrates using the 13-chordate protein dataset and sea lamprey as the outgroup.**

The ‘slow’ column shows the ‘significantly’ slower evolving ingroup species based on P-value. The ‘identical’ and ‘divergent’ columns refer to sites where the amino acid residue is the same or different in all 3 sequences, respectively. ‘Ingroup1-specific’ column refers to sites where ingroup 2 and outgroup share the same amino acid but not ingroup 1. The same applies for ‘ingroup2-specific’ and ‘outgroup-specific’.

| Ingroup1    | Ingroup2        | Outgroup | Genes | Identical | Divergent | Ingroup1 specific | Ingroup2 specific | Outgroup specific | Slow            | CHI <sup>2</sup> _test_statistic | P-value  |
|-------------|-----------------|----------|-------|-----------|-----------|-------------------|-------------------|-------------------|-----------------|----------------------------------|----------|
| Human       | <i>C. milii</i> | Lamprey  | 699   | 141977    | 24814     | 15046             | 14154             | 41912             | <i>C. milii</i> | 27.25                            | 1.79E-07 |
| Mouse       | <i>C. milii</i> | Lamprey  | 699   | 141468    | 25497     | 15555             | 14312             | 41071             | <i>C. milii</i> | 51.73                            | 6.37E-13 |
| Cow         | <i>C. milii</i> | Lamprey  | 699   | 141608    | 24992     | 15413             | 14275             | 41612             | <i>C. milii</i> | 43.62                            | 3.98E-11 |
| Opossum     | <i>C. milii</i> | Lamprey  | 699   | 141503    | 24928     | 15520             | 13726             | 42226             | <i>C. milii</i> | 110.05                           | 9.57E-26 |
| Chicken     | <i>C. milii</i> | Lamprey  | 699   | 142197    | 24221     | 14822             | 13901             | 42753             | <i>C. milii</i> | 29.53                            | 5.50E-08 |
| Lizard      | <i>C. milii</i> | Lamprey  | 699   | 141508    | 25149     | 15515             | 13999             | 41732             | <i>C. milii</i> | 77.87                            | 1.10E-18 |
| Xenopus     | <i>C. milii</i> | Lamprey  | 699   | 139525    | 26285     | 17485             | 13982             | 40604             | <i>C. milii</i> | 389.96                           | 8.43E-87 |
| Coelacanth  | <i>C. milii</i> | Lamprey  | 699   | 141714    | 22849     | 15306             | 13069             | 44958             | <i>C. milii</i> | 176.36                           | 3.02E-40 |
| Stickleback | <i>C. milii</i> | Lamprey  | 699   | 138142    | 28292     | 18880             | 15179             | 37409             | <i>C. milii</i> | 402.17                           | 1.86E-89 |
| Zebrafish   | <i>C. milii</i> | Lamprey  | 699   | 139910    | 27181     | 17111             | 14934             | 38764             | <i>C. milii</i> | 147.90                           | 5.00E-34 |

### Supplementary Table VI.2 | Two-Cluster tests using Lintre for the 13-chordate dataset

The various pairwise comparisons analyzed and the respective topologies are shown to indicate the node and tip numbering. The fast or slow-evolving cluster at each node is denoted by '>' or '<'. Nodes involving *C. milii* comparisons are highlighted. Z, Z-statistics; CP, confidence probability.

| node | L  | R | delta | s.e.     | Z        | CP        | height | s.e.     | bA       | bB       | bC       |          |
|------|----|---|-------|----------|----------|-----------|--------|----------|----------|----------|----------|----------|
| 22   | 10 | < | 9     | 0.030014 | 0.001245 | 24.105183 | 99.96% | 0.121251 | 0.000691 | 0.106244 | 0.136257 | 0.33579  |
| 18   | 6  | > | 5     | 0.014978 | 0.000938 | 15.968775 | 99.96% | 0.092957 | 0.000567 | 0.100446 | 0.085468 | 0.275167 |
| 14   | 1  | < | 2     | 0.012579 | 0.000572 | 21.999766 | 99.96% | 0.038799 | 0.00032  | 0.03251  | 0.045088 | 0.312768 |
| 15   | 14 | < | 3     | 0.000128 | 0.000534 | 0.239538  | 18.20% | 0.038358 | 0.000279 | 0.038294 | 0.038422 | 0.340758 |
| 16   | 15 | > | 4     | 0.001146 | 0.000778 | 1.472955  | 85.84% | 0.071154 | 0.00043  | 0.071727 | 0.070581 | 0.333678 |
| 17   | 16 | > | 18    | 0.004283 | 0.000851 | 5.035696  | 99.96% | 0.108321 | 0.00052  | 0.110462 | 0.106179 | 0.348506 |
| 19   | 17 | < | 7     | 0.028137 | 0.001208 | 23.288071 | 99.96% | 0.146    | 0.000703 | 0.131931 | 0.160069 | 0.3532   |
| 20   | 19 | > | 8     | 0.007565 | 0.001257 | 6.018724  | 99.96% | 0.1496   | 0.000693 | 0.153382 | 0.145818 | 0.373758 |
| 21   | 20 | < | 22    | 0.033394 | 0.00139  | 24.032621 | 99.96% | 0.191358 | 0.000807 | 0.174661 | 0.208055 | 0.447187 |
| 23   | 21 | > | 11    | 0.025452 | 0.001699 | 14.98295  | 99.96% | 0.169774 | 0.000734 | 0.1825   | 0.157048 | 0.590516 |
| 24   | 23 | < | 12    | 0.088112 | 0.003553 | 24.79951  | 99.96% | 0.317119 | 0.001398 | 0.273063 | 0.361175 | 0.634104 |

Q=3313.091139

| node | L | R | delta | s.e.     | Z        | CP        | height | s.e.     | bA       | bB       | bC      |          |
|------|---|---|-------|----------|----------|-----------|--------|----------|----------|----------|---------|----------|
| 5    | 1 | > | 2     | 0.030782 | 0.00217  | 14.185666 | 99.96% | 0.150801 | 0.00082  | 0.166192 | 0.13541 | 0.612204 |
| 6    | 5 | < | 3     | 0.095271 | 0.003762 | 25.321526 | 99.96% | 0.312935 | 0.001459 | 0.2653   | 0.36057 | 0.634841 |

Q=877.093257

| node | L  | R | delta | s.e.     | Z        | CP        | height | s.e.     | bA       | bB       | bC       |          |
|------|----|---|-------|----------|----------|-----------|--------|----------|----------|----------|----------|----------|
| 15   | 6  | > | 5     | 0.015188 | 0.000969 | 15.669913 | 99.96% | 0.092961 | 0.000567 | 0.100555 | 0.085367 | 0.282403 |
| 11   | 1  | < | 2     | 0.013615 | 0.00058  | 23.483639 | 99.96% | 0.0388   | 0.00032  | 0.031992 | 0.045607 | 0.311179 |
| 12   | 11 | > | 3     | 0.000035 | 0.000548 | 0.063594  | 4.78%  | 0.03836  | 0.000279 | 0.038377 | 0.038342 | 0.351337 |
| 13   | 12 | > | 4     | 0.001159 | 0.000818 | 1.416478  | 84.14% | 0.071155 | 0.00043  | 0.071734 | 0.070575 | 0.359201 |
| 14   | 13 | > | 15    | 0.003564 | 0.000971 | 3.670968  | 99.96% | 0.108324 | 0.00052  | 0.110106 | 0.106542 | 0.427537 |
| 16   | 14 | < | 7     | 0.029903 | 0.001494 | 20.008691 | 99.96% | 0.146006 | 0.000703 | 0.131055 | 0.160957 | 0.486882 |
| 17   | 16 | > | 8     | 0.019875 | 0.001817 | 10.935982 | 99.96% | 0.165862 | 0.000769 | 0.1758   | 0.155925 | 0.591651 |
| 18   | 17 | < | 9     | 0.094665 | 0.003641 | 25.996654 | 99.96% | 0.314637 | 0.001426 | 0.267304 | 0.361969 | 0.633355 |

Q=2117.531370

| node | L | R | delta | s.e.     | Z        | CP        | height | s.e.     | bA       | bB       | bC       |          |
|------|---|---|-------|----------|----------|-----------|--------|----------|----------|----------|----------|----------|
| 6    | 1 | > | 2     | 0.026826 | 0.001575 | 17.030176 | 99.96% | 0.121249 | 0.000691 | 0.134662 | 0.107836 | 0.53405  |
| 7    | 6 | > | 3     | 0.042324 | 0.002091 | 20.243862 | 99.96% | 0.192963 | 0.000931 | 0.214125 | 0.171801 | 0.575861 |
| 8    | 7 | < | 4     | 0.081202 | 0.003657 | 22.205508 | 99.96% | 0.318735 | 0.001443 | 0.278134 | 0.359336 | 0.636151 |

Q=1243.697200

| node | L | R | delta | s.e.    | Z        | CP        | height | s.e.     | bA       | bB       | bC       |          |
|------|---|---|-------|---------|----------|-----------|--------|----------|----------|----------|----------|----------|
| 4    | 1 | < | 2     | 0.11097 | 0.003974 | 27.926665 | 99.96% | 0.305393 | 0.001529 | 0.249908 | 0.360879 | 0.634594 |

Q=779.898602

**Supplementary Table VI.3 | Takezaki Two-Cluster test using the 13-chordate dataset**

Mean pairwise distances of different vertebrate ingroup clusters to the outgroup (amphioxus) are shown. The distances were obtained from the ML tree shown in Figure 1. Z-statistics were used to infer if the differences between the distances to the outgroup for the two ingroup clusters are significantly different from 0 or not. Standard error (S.E.) for calculating the Z-statistics were obtained using distances from 100 bootstrap replicates (MEGA5) and 100 random Bayesian trees. Mean pairwise distance to the outgroup for ingroup a ( $L_{ac}$ ) and ingroup b ( $L_{bc}$ ) are shown;  $|\delta| = |L_{ac} - L_{bc}|$  is the absolute value of the difference between the distances of the two ingroup clusters to the outgroup; Z-statistics is  $|\delta|/S.E.$ ; CP (confidence probability) value is  $1 - P$ -value.

| Ingroup-a       | Ingroup-b   | $L_{ac}$ | $L_{bc}$ | $ \delta $ | Bayes100 |        |         |          | MEGA   |        |         |          |
|-----------------|-------------|----------|----------|------------|----------|--------|---------|----------|--------|--------|---------|----------|
|                 |             |          |          |            | S.E.     | Z-stat | P-value | CP value | S.E.   | Z-stat | P-value | CP value |
| <i>C. milii</i> | Coelacanth  | 0.93     | 0.96     | 0.03       | 0.0002   | 181.35 | 0       | 100.00%  | 0.0008 | 37.88  | 0       | 100.00%  |
| <i>C. milii</i> | Tetrapods   | 0.93     | 1.016    | 0.09       | 0.0002   | 519.96 | 0       | 100.00%  | 0.0008 | 106.54 | 0       | 100.00%  |
| <i>C. milii</i> | Teleosts    | 0.93     | 1.05     | 0.12       | 0.0002   | 646.79 | 0       | 100.00%  | 0.0010 | 127.54 | 0       | 100.00%  |
| <i>C. milii</i> | Sea lamprey | 0.93     | 1.04     | 0.12       | 0.0003   | 424.14 | 0       | 100.00%  | 0.0016 | 75.25  | 0       | 100.00%  |

**Supplementary Table VI.4 | Pairwise distance to the outgroup (amphioxus) for the 13-chordate dataset.**

Pairwise distances were calculated from the 13-chordate neutral tree using the R-package ‘ape’ (see Methods).

| Species         | Pairwise distance to amphioxus<br>(substitutions per 4D site) |
|-----------------|---------------------------------------------------------------|
| Human           | 2.3549287                                                     |
| Mouse           | 2.5619558                                                     |
| Cow             | 2.4145335                                                     |
| Opossum         | 2.3145022                                                     |
| Chicken         | 2.2832321                                                     |
| Lizard          | 2.3958730                                                     |
| Xenopus         | 2.551982                                                      |
| Coelacanth      | 2.121122                                                      |
| Stickleback     | 2.601429 (highest)                                            |
| Zebrafish       | 2.413519                                                      |
| <i>C. milii</i> | <b>2.058743 (lowest)</b>                                      |
| Sea lamprey     | 2.125137                                                      |



**Supplementary Table VII.1 | Intron gain and loss in deep gnathostome lineages.**Lgi, *Lottia gigantea*; Nve, *Nematostella vectensis*; Tad, *Trichoplax adhaerens*.

| Sl. No.                             | Gene    | Elephant shark gene ID | Intron Presence/Absence |              |           | Non-chordate invertebrates |               |
|-------------------------------------|---------|------------------------|-------------------------|--------------|-----------|----------------------------|---------------|
|                                     |         |                        | Elephant shark          | Osteichthyes | Amphioxus | Present                    | Absent        |
| <b>Osteichthyes ancestor gains</b>  |         |                        |                         |              |           |                            |               |
| 1                                   | FAM46A  | SINCAMT00000026881     | -                       | +            | -         | -                          | Lgi, Nve, Tad |
| 2                                   | FBXO33  | SINCAMT00000025248     | -                       | +            | -         | -                          | Lgi           |
| 3                                   | FBXO45  | SINCAMT00000025801     | -                       | +            | -         | -                          | Lgi, Nve      |
| 4                                   | FEM1B   | SINCAMT00000015243     | -                       | +            | -         | -                          | Lgi, Nve, Tad |
| 5                                   | KLHDC4  | SINCAMT00000006825     | -                       | +            | -         | -                          | -             |
| 6                                   | ALG2    | SINCAMT00000026708     | -                       | +            | -         | -                          | Lgi, Nve      |
| 7                                   | ESPL1   | SINCAMT00000016975     | -                       | +            | -         | -                          | -             |
| 8                                   | BRPF1   | SINCAMT00000003885     | -                       | +            | -         | -                          | Lgi, Nve, Tad |
| 9                                   | CBLB    | SINCAMT00000023852     | -                       | +            | -         | -                          | Lgi, Nve, Tad |
| 10                                  | NDUFA8  | SINCAMT00000002244     | -                       | +            | -         | -                          | Lgi, Nve, Tad |
| 11                                  | N4BP3   | SINCAMT00000018579     | -                       | +            | -         | -                          | Lgi           |
| 12                                  | ITIH5   | SINCAMT00000014592     | -                       | +            | -         | -                          | Lgi           |
| 13                                  | PIGS    | SINCAMT00000021003     | -                       | +            | -         | -                          | Lgi, Tad      |
| <b>Osteichthyes ancestor losses</b> |         |                        |                         |              |           |                            |               |
| 1                                   | ATP13A1 | SINCAMT00000022114     | +                       | -            | +         | NA                         | NA            |
| 2                                   | MMP24   | SINCAMT00000021968     | +                       | -            | +         | -                          | Lgi, Nve      |
| 3                                   | CPT2    | SINCAMT00000007581     | +                       | -            | +         | NA                         | NA            |
| 4                                   | HSPA5   | SINCAMT00000018894     | +                       | -            | +         | NA                         | NA            |
| 5                                   | ZYG11B  | SINCAMT00000012990     | +                       | -            | +         | NA                         | NA            |
| 6                                   | EIF2C4  | SINCAMT00000017848     | +                       | -            | +         | NA                         | NA            |
| 7                                   | SGK1    | SINCAMT00000004343     | +                       | -            | +         | NA                         | NA            |
| 8                                   | DDX42   | SINCAMT00000017140     | +                       | -            | +         | NA                         | NA            |
| 9                                   | MCM2    | SINCAMT00000005748     | +                       | -            | +         | NA                         | NA            |
| 10                                  | HECW1   | SINCAMT00000007670     | +                       | -            | +         | NA                         | NA            |
| <b>Elephant shark gains</b>         |         |                        |                         |              |           |                            |               |
| 1                                   | ATP13A1 | SINCAMT00000022114     | +                       | -            | -         | -                          | Lgi, Nve, Tad |
| 2                                   | FEM1B   | SINCAMT00000015243     | +                       | -            | -         | -                          | Lgi, Nve, Tad |
| 3                                   | NSA2    | SINCAMT00000005981     | +                       | -            | -         | -                          | Lgi, Nve, Tad |
| 4                                   | EXTL3   | SINCAMT00000015064     | +                       | -            | -         | -                          | Lgi, Nve      |
| 5                                   | EXTL3   | SINCAMT00000015064     | +                       | -            | -         | -                          | Lgi, Nve      |
| 6                                   | PMPCA   | SINCAMT00000003405     | +                       | -            | -         | -                          | Lgi, Nve, Tad |
| 7                                   | BRD4    | SINCAMT00000021269     | +                       | -            | -         | -                          | Lgi, Nve, Tad |
| 8                                   | SLITRK1 | SINCAMT00000008887     | +                       | -            | -         | -                          | Lgi, Nve, Tad |
| 9                                   | PTPRO   | SINCAMT00000000077     | +                       | -            | -         | NA                         | NA            |

---

| <b>Elephant shark losses</b> |        |                    |   |   |   |    |    |
|------------------------------|--------|--------------------|---|---|---|----|----|
| 1                            | COG8   | SINCAMT00000006291 | - | + | + | NA | NA |
| 2                            | ODZ1   | SINCAMT00000025114 | - | + | + | NA | NA |
| 3                            | DGKE   | SINCAMT00000017717 | - | + | + | NA | NA |
| 4                            | TIMM10 | SINCAMT00000026952 | - | + | + | NA | NA |
| 5                            | NUDT19 | SINCAMT00000026551 | - | + | + | NA | NA |
| 6                            | NUDT19 | SINCAMT00000026551 | - | + | + | NA | NA |

---

**Supplementary Table VIII.5 | *C. milii* scaffolds showing one-to-one gene synteny with either chicken or human chromosomes but not corresponding to the 40 ancestral GLGs identified by Nakatani et al. (2007).**

| Elephant shark scaffold | synteny with chicken  |                  | synteny with human  |                  |
|-------------------------|-----------------------|------------------|---------------------|------------------|
|                         | Syntenic chicken chr. | No. of orthologs | Syntenic human chr. | No. of orthologs |
| scaffold_110            | chr_1                 | 9                | chr_21              | 9                |
| scaffold_152            | chr_1                 | 10               | chr_21              | 12               |
| scaffold_170            | chr_1                 | 14               | chr_21              | 12               |
| scaffold_222            | chr_1                 | 4                | chr_21              | 4                |
| scaffold_255            | chr_1                 | 9                | chr_21              | 8                |
| scaffold_217            | chr_3                 | 7                | chr_8               | 5                |
| scaffold_218            | chr_4                 | 3                | chr_2               | 6                |
| scaffold_239            | chr_7                 | 5                | chr_21              | 6                |
| scaffold_246            | chr_7                 | 9                | chr_3               | 5                |
| scaffold_102            | chr_7                 | 6                | chr_3,chr_X         | 8                |
| scaffold_426            | chr_14                | 4                | chr_17              | 4                |
| scaffold_214            | chr_19                | 3                | chr_7               | 10               |

**Supplementary Table VIII.6 | *C. milii* scaffolds showing synteny with the macro and microchromosomes of chicken.**

Chicken chromosomes 11 to 28 (in bold) are microchromosomes. Scaffolds marked with an asterisk are syntenic to more than 1 chicken chromosome. Each of the 4 elephant shark scaffolds highlighted in red is syntenic to one microchromosome and one macrochromosome.

| Chicken chr. | Elephant shark scaffolds                                                                                                                                                                                             |
|--------------|----------------------------------------------------------------------------------------------------------------------------------------------------------------------------------------------------------------------|
| 1            | 7*, <b>6*</b> , 4*, 18, 20, 17*, 42, 39, 16*, 35, 53*, 63, 81, 113, 119, 133, 145, 118*, 235, 123, 170, 261, 237, 191, 29*, 181, 157, 152, 255, 110, 136, 206, 299, 267, 344, 327, 271, 222, 975, 438, 305, 291, 194 |
| 2            | 7*, 9*, 4*, 17*, 16*, 13, 53*, 48, 49*, 60, 79, 37, 56, 84, 83, 55, 40, 80, 72, 90, 86, 105, 104, 118*, 98, 129, 99, 29*, 187, 142, 207, 160, 150, 210, 178, 139, 89*, 108, 158, 245, 233, 307, 272                  |
| 3            | 1*, 23, 34, 26, 31, 49*, 32, 68, 62, 61, 71, 134, 51, 135, 106, <b>109*</b> , 164, 143, 128, 159, 120, 78*, 284, 217, 213, 124                                                                                       |
| 4            | 2, 11, 25, 53*, <b>19*</b> , 21*, 59, 50, 67, 43, 57, 138, 65*, 117, 96, 193*, 166, 269, 230, 78*, 208, 175, 335, 198, 268, 218                                                                                      |
| 5            | 9*, 8, 28, 114, 153, 130, 249, 319, 216, 313, 602, 334, 179, 174                                                                                                                                                     |
| 6            | 3, 115, 111, 146, 126, 241, 453, 352                                                                                                                                                                                 |
| 7            | 14, 16*, <b>45*</b> , 46, 76, 246, 288, 149, 102, 239, 301                                                                                                                                                           |
| 8            | 7*, 41, 74, 234, 101, 112, 252, 283, 745                                                                                                                                                                             |
| 9            | 1*, 95                                                                                                                                                                                                               |
| 10           | 5, 211, 282, 203, 399                                                                                                                                                                                                |
| <b>11</b>    | 12, 197, 127, 189, 148                                                                                                                                                                                               |
| <b>12</b>    | 15, 107, 38, 231, 333, 347, 539                                                                                                                                                                                      |
| <b>13</b>    | 87, <b>19*</b> , 204, 92, 156, 144, 168, 200                                                                                                                                                                         |
| <b>14</b>    | 30, 147, 154, 131, <b>109*</b> , 163, 212, 426, 312, 205                                                                                                                                                             |
| <b>15</b>    | 94, 91, 196, 66, 226, 356                                                                                                                                                                                            |
| <b>17</b>    | 77, <b>45*</b> , 100, 258, 236                                                                                                                                                                                       |

**Supplementary Table VIII.6 | Cont'd.**

---

| <b>Chicken chr.</b> | <b>Elephant shark scaffolds</b>                                                                            |
|---------------------|------------------------------------------------------------------------------------------------------------|
| 18                  | 10, 514, 242                                                                                               |
| 19                  | 47, 82, 155, 398, 397, 214                                                                                 |
| 20                  | 6*, 137, 247, 315, 223                                                                                     |
| 21                  | 93, 58, 400, 338, 183                                                                                      |
| 22                  | 368, 380, 532                                                                                              |
| 23                  | 36, 121, 227, 171, 162                                                                                     |
| 24                  | 44, 184, 228, 511                                                                                          |
| 26                  | 70, 33                                                                                                     |
| 27                  | 88, 122, 185, 293, 256, 357, 251                                                                           |
| 28                  | 64, 85, 209, 316, 292                                                                                      |
| Z                   | 22, 16*, 21*, 24, 27, 52, 73, 54, 140, 75, 69, 103, 65*, 193*, 165, 173, 167, 89*, 232, 202, 172, 132, 591 |

---

### Supplementary Table VIII.7 | Interchromosomal rearrangements in the medaka lineage.

Syntenic relationships based on comparison of *C. milii* scaffolds and medaka chromosomes are compared to the 13 teleost proto-chromosomes reconstructed by Kasahara et al. (2007). Novel interchromosomal rearrangements predicted in this study are highlighted in red.

| Syntenic relationship identified by Kasahara et al. (2007) <sup>1</sup> |                    | Syntenic relationship identified by comparison with elephant shark. |                                 |
|-------------------------------------------------------------------------|--------------------|---------------------------------------------------------------------|---------------------------------|
| Teleost proto-chromosome                                                | Medaka chromosomes | Elephant shark scaffold                                             | Medaka chromosomes              |
| b                                                                       | Ola11, Ola16       | scaffold_13                                                         | Ola4, Ola11, Ola16, Ola20       |
| c                                                                       | Ola2, Ola21        | scaffold_14                                                         | Ola2, Ola3, Ola17, Ola21        |
| d                                                                       | Ola1, Ola15, Ola19 | scaffold_31                                                         | Ola1, Ola15, Ola24              |
| e                                                                       | Ola1, Ola8, Ola19  | scaffold_10                                                         | Ola1, Ola8, Ola19               |
|                                                                         |                    | scaffold_30                                                         |                                 |
| f                                                                       | Ola1, Ola10, Ola18 | scaffold_2                                                          | Ola10, Ola14, Ola18             |
|                                                                         |                    | scaffold_11                                                         | Ola1, Ola4, Ola10, Ola12, Ola18 |
| g                                                                       | Ola10, Ola14       | scaffold_2                                                          | Ola10, Ola14, Ola18             |
| h                                                                       | Ola13, Ola14       | scaffold_18                                                         | Ola4, Ola13, Ola14, Ola21       |
| i                                                                       | Ola9, Ola12        | scaffold_22                                                         | Ola9, Ola12                     |
|                                                                         |                    | scaffold_73                                                         |                                 |
|                                                                         |                    | scaffold_94                                                         |                                 |
|                                                                         |                    | scaffold_140                                                        |                                 |
| j                                                                       | Ola3, Ola6         | scaffold_196                                                        | Ola3, Ola6                      |
|                                                                         |                    | scaffold_5                                                          |                                 |
|                                                                         |                    | scaffold_8                                                          |                                 |
|                                                                         |                    | scaffold_12                                                         |                                 |
|                                                                         |                    | scaffold_197                                                        |                                 |
| k                                                                       | Ola6, Ola23        | scaffold_211                                                        | Ola6, Ola23                     |
|                                                                         |                    | scaffold_282                                                        |                                 |
|                                                                         |                    | scaffold_35                                                         |                                 |
|                                                                         |                    | scaffold_39                                                         |                                 |
| l                                                                       | Ola5, Ola7         | scaffold_119                                                        | Ola5, Ola7                      |
|                                                                         |                    | scaffold_237                                                        |                                 |
|                                                                         |                    | scaffold_15                                                         |                                 |
|                                                                         |                    | scaffold_38                                                         |                                 |
|                                                                         |                    | scaffold_33                                                         |                                 |
|                                                                         |                    | scaffold_58                                                         |                                 |
|                                                                         |                    | scaffold_70                                                         |                                 |
| scaffold_107                                                            |                    |                                                                     |                                 |
|                                                                         |                    | scaffold_137                                                        |                                 |
|                                                                         |                    | scaffold_223                                                        |                                 |

Supplementary Table VIII.7 | Cont'd.

| Syntenic relationship identified by Kasahara et al. (2007) <sup>1</sup> |                           | Syntenic relationship identified by comparison with elephant shark. |                          |
|-------------------------------------------------------------------------|---------------------------|---------------------------------------------------------------------|--------------------------|
| Teleost proto-chromosome                                                | Medaka chromosomes        | Elephant shark scaffold                                             | Medaka chromosomes       |
| m                                                                       | Ola4, Ola13, Ola17, Ola20 | scaffold_48                                                         | Ola11, Ola17, Ola20      |
|                                                                         |                           | scaffold_20                                                         | Ola3, Ola4, Ola13, Ola21 |

1. Kasahara M, *et al.* 2007. The medaka draft genome and insights into vertebrate genome evolution. *Nature* 447: 714-719.

### Supplementary Table VIII.8 | Interchromosomal rearrangements in the zebrafish lineage.

Syntenic relationships based on comparison of *C. milii* scaffolds and zebrafish chromosomes are compared to the 13 teleost proto-chromosomes reconstructed by Kasahara et al. (2007). Novel interchromosomal rearrangements predicted in this study are highlighted in red.

| Syntenic relationship identified by Kasahara et al. (2007) <sup>1</sup> |                           | Syntenic relationship identified by comparison with elephant shark. |                                  |
|-------------------------------------------------------------------------|---------------------------|---------------------------------------------------------------------|----------------------------------|
| Teleost proto-chromosome                                                | Zebrafish chromosomes     | Elephant shark scaffold                                             | Zebrafish chromosomes            |
| a                                                                       | Dre13, Dre17, Dre20       | scaffold_26                                                         | Dre4, Dre16, Dre17, Dre20, Dre23 |
|                                                                         |                           | scaffold_3                                                          | Dre12, Dre13, Dre17              |
|                                                                         |                           | scaffold_114                                                        | Dre13, Dre17, Dre20              |
|                                                                         |                           | scaffold_34                                                         | Dre13, Dre17, Dre20, Dre22       |
| b                                                                       | Dre16, Dre19              | scaffold_13                                                         | Dre2, Dre16, Dre19, Dre24        |
| d                                                                       | Dre1, Dre12, Dre13        | scaffold_23                                                         | Dre1, Dre12, Dre13, Dre17        |
|                                                                         |                           | scaffold_3                                                          | Dre12, Dre13, Dre17              |
| e                                                                       | Dre1, Dre3, Dre12         | scaffold_23                                                         | Dre1, Dre12, Dre13, Dre17        |
|                                                                         |                           | scaffold_30                                                         | Dre1, Dre3, Dre12, Dre24         |
| f                                                                       | Dre1, Dre7, Dre14         | scaffold_25                                                         | Dre1, Dre14, Dre20, Dre23        |
|                                                                         |                           | scaffold_11                                                         | Dre1, Dre7, Dre10, Dre14, Dre23  |
|                                                                         |                           | scaffold_2                                                          | Dre5, Dre7, Dre14                |
| g                                                                       | Dre5, Dre10, Dre14, Dre21 | scaffold_11                                                         | Dre1, Dre7, Dre10, Dre14, Dre23  |
|                                                                         |                           | scaffold_50                                                         | Dre5, Dre10, Dre14, Dre21        |
|                                                                         |                           | scaffold_44                                                         | Dre5, Dre10, Dre15, Dre18        |
|                                                                         |                           | scaffold_47                                                         | Dre5, Dre10, Dre15, Dre21        |
|                                                                         |                           | scaffold_27                                                         | Dre5, Dre10, Dre21               |
|                                                                         |                           | scaffold_2                                                          | Dre5, Dre7, Dre14                |
|                                                                         |                           | scaffold_22                                                         | Dre5, Dre8, Dre10                |
|                                                                         |                           | scaffold_94                                                         | Dre5, Dre8, Dre10, Dre21         |
| scaffold_100                                                            |                           |                                                                     |                                  |
| h                                                                       | Dre5, Dre10, Dre15, Dre21 | scaffold_50                                                         | Dre5, Dre10, Dre14, Dre21        |
|                                                                         |                           | scaffold_44                                                         | Dre5, Dre10, Dre15, Dre18        |
|                                                                         |                           | scaffold_47                                                         | Dre5, Dre10, Dre15, Dre21        |
|                                                                         |                           | scaffold_27                                                         | Dre5, Dre10, Dre21               |
|                                                                         |                           | scaffold_22                                                         | Dre5, Dre8, Dre10                |
|                                                                         |                           | scaffold_94                                                         | Dre5, Dre8, Dre10, Dre21         |
|                                                                         |                           | scaffold_100                                                        |                                  |
|                                                                         |                           | scaffold_18                                                         | Dre6, Dre9, Dre10, Dre15         |
| i                                                                       | Dre5, Dre8, Dre10, Dre21  | scaffold_50                                                         | Dre5, Dre10, Dre14, Dre21        |
|                                                                         |                           | scaffold_44                                                         | Dre5, Dre10, Dre15, Dre18        |
|                                                                         |                           | scaffold_47                                                         | Dre5, Dre10, Dre15, Dre21        |
|                                                                         |                           | scaffold_27                                                         | Dre5, Dre10, Dre21               |
|                                                                         |                           | scaffold_22                                                         | Dre5, Dre8, Dre10                |



Supplementary Table VIII.8 | Cont'd.

| Syntenic relationship identified by Kasahara et al. (2007) <sup>1</sup> |                                              | Syntenic relationship identified by comparison with elephant shark. |                                 |
|-------------------------------------------------------------------------|----------------------------------------------|---------------------------------------------------------------------|---------------------------------|
| Teleost proto-chromosome                                                | Zebrafish chromosomes                        | Elephant shark scaffold                                             | Zebrafish chromosomes           |
| i                                                                       | Dre5, Dre8, Dre10, Dre21                     | scaffold_94<br>scaffold_100                                         | Dre5, Dre8, Dre10, Dre21        |
| j                                                                       | Dre7, Dre18, Dre25                           | scaffold_39                                                         | Dre4, Dre18, Dre25              |
|                                                                         |                                              | scaffold_12                                                         | Dre7, Dre17, Dre18, Dre25       |
|                                                                         |                                              | scaffold_8                                                          | Dre7, Dre18, Dre25              |
|                                                                         |                                              | scaffold_5                                                          |                                 |
| scaffold_211                                                            |                                              |                                                                     |                                 |
| k                                                                       | Dre4, Dre18, Dre25,                          | scaffold_39                                                         | Dre4, Dre18, Dre25              |
|                                                                         |                                              | scaffold_12                                                         | Dre7, Dre17, Dre18, Dre25       |
|                                                                         |                                              | scaffold_8                                                          | Dre7, Dre18, Dre25              |
|                                                                         |                                              | scaffold_5                                                          |                                 |
| scaffold_211                                                            |                                              |                                                                     |                                 |
| l                                                                       | Dre6, Dre11, Dre23                           | scaffold_14                                                         | Dre1, Dre6, Dre9, Dre11, Dre22  |
|                                                                         |                                              | scaffold_20                                                         | Dre1, Dre6, Dre9, Dre11, Dre24  |
|                                                                         |                                              | scaffold_10                                                         | Dre3, Dre6, Dre11, Dre12, Dre22 |
| m                                                                       | Dre2, Dre6, Dre8, Dre11, Dre15, Dre22, Dre24 | scaffold_14                                                         | Dre1, Dre6, Dre9, Dre11, Dre22  |
|                                                                         |                                              | scaffold_20                                                         | Dre1, Dre6, Dre9, Dre11, Dre24  |
|                                                                         |                                              | scaffold_13                                                         | Dre2, Dre16, Dre19, Dre24       |
|                                                                         |                                              | scaffold_48                                                         | Dre2, Dre19, Dre24              |
|                                                                         |                                              | scaffold_74                                                         | Dre2, Dre6, Dre8, Dre20         |
|                                                                         |                                              | scaffold_41                                                         | Dre2, Dre6, Dre8, Dre20, Dre22  |
|                                                                         |                                              | scaffold_10                                                         | Dre3, Dre6, Dre11, Dre12, Dre22 |
| scaffold_18                                                             | Dre6, Dre9, Dre10, Dre15                     |                                                                     |                                 |
| -                                                                       | -                                            | scaffold_42                                                         | Dre9, Dre10, Dre22              |

1. Kasahara M, *et al.* 2007. The medaka draft genome and insights into vertebrate genome evolution. *Nature* 447: 714-719.

**Supplementary Table IX.1 | Top 100 protein domains in *C. milii***

| S/N | Protein domain                                          | Pfam IDs                  | Protein count | Percentage of total proteins |
|-----|---------------------------------------------------------|---------------------------|---------------|------------------------------|
| 1   | Immunoglobulin V-set domain                             | PF07686                   | 596           | 3.4155                       |
| 2   | 7 transmembrane receptor (rhodopsin family)             | PF00001                   | 589           | 3.3754                       |
| 3   | Immunoglobulin domain                                   | PF13895, PF00047, PF13927 | 527           | 3.0201                       |
| 4   | Protein kinase domain                                   | PF00069                   | 472           | 2.7049                       |
| 5   | Protein tyrosine kinase                                 | PF07714                   | 463           | 2.6533                       |
| 6   | Immunoglobulin I-set domain                             | PF07679                   | 295           | 1.6905                       |
| 7   | Zinc finger, C3HC4 type (RING finger)                   | PF13920, PF13923, PF00097 | 287           | 1.6447                       |
| 8   | WD domain, G-beta repeat                                | PF00400                   | 233           | 1.3352                       |
| 9   | C2H2-type zinc finger                                   | PF13894, PF13912          | 225           | 1.2894                       |
| 10  | Zinc finger, C2H2 type                                  | PF00096                   | 222           | 1.2722                       |
| 11  | Ring finger domain                                      | PF13639                   | 214           | 1.2264                       |
| 12  | Zinc-finger double domain                               | PF13465                   | 211           | 1.2092                       |
| 13  | Ankyrin repeats (3 copies)                              | PF12796                   | 200           | 1.1461                       |
| 14  | Ankyrin repeat                                          | PF00023, PF13606          | 198           | 1.1347                       |
| 15  | Homeobox domain                                         | PF00046                   | 198           | 1.1347                       |
| 16  | Leucine rich repeat                                     | PF13504, PF13855          | 192           | 1.1003                       |
| 17  | Leucine Rich Repeat                                     | PF00560                   | 190           | 1.0888                       |
| 18  | Ankyrin repeats (many copies)                           | PF13637, PF13857          | 187           | 1.0716                       |
| 19  | RNA recognition motif. (a.k.a. RRM, RBD, or RNP domain) | PF00076, PF13893          | 181           | 1.0372                       |
| 20  | Ras family                                              | PF00071                   | 172           | 0.9857                       |
| 21  | B-box zinc finger                                       | PF00643                   | 166           | 0.9513                       |
| 22  | Miro-like protein                                       | PF08477                   | 164           | 0.9398                       |
| 23  | ADP-ribosylation factor family                          | PF00025                   | 161           | 0.9226                       |
| 24  | RNA recognition motif (a.k.a. RRM, RBD, or RNP domain)  | PF14259                   | 153           | 0.8768                       |
| 25  | SPRY domain                                             | PF00622                   | 150           | 0.8596                       |
| 26  | RING-type zinc-finger, LisH dimerisation motif          | PF13445                   | 149           | 0.8539                       |
| 27  | PH domain                                               | PF00169                   | 148           | 0.8481                       |
| 28  | Variant SH3 domain                                      | PF07653                   | 148           | 0.8481                       |
| 29  | SH3 domain                                              | PF00018                   | 145           | 0.8309                       |
| 30  | Fibronectin type III domain                             | PF00041                   | 139           | 0.7966                       |

|    |                                             |                                                                                                                              |     |        |
|----|---------------------------------------------|------------------------------------------------------------------------------------------------------------------------------|-----|--------|
| 31 | Serpentine type 7TM GPCR chemoreceptor Srsx | PF10320                                                                                                                      | 130 | 0.7450 |
| 32 | Leucine Rich repeats (2 copies)             | PF12799                                                                                                                      | 126 | 0.7221 |
| 33 | BTB/POZ domain                              | PF00651                                                                                                                      | 124 | 0.7106 |
| 34 | PDZ domain (Also known as DHR or GLGF)      | PF00595                                                                                                                      | 122 | 0.6991 |
| 35 | SPRY-associated domain                      | PF13765                                                                                                                      | 122 | 0.6991 |
| 36 | Leucine Rich repeat                         | PF13516                                                                                                                      | 121 | 0.6934 |
| 37 | EF-hand domain pair                         | PF13499, PF13833                                                                                                             | 119 | 0.6819 |
| 38 | EF-hand domain                              | PF13405                                                                                                                      | 111 | 0.6361 |
| 39 | C2 domain                                   | PF00168                                                                                                                      | 110 | 0.6304 |
| 40 | Tetratricopeptide repeat                    | PF07719, PF00515, PF13371, PF13181, PF13176, PF13174, PF13432, PF13429, PF13424, PF13374, PF13431, PF07721, PF07720, PF13428 | 105 | 0.6017 |
| 41 | SH2 domain                                  | PF00017                                                                                                                      | 102 | 0.5845 |
| 42 | Major Facilitator Superfamily               | PF07690                                                                                                                      | 101 | 0.5788 |
| 43 | Ion transport protein                       | PF00520                                                                                                                      | 99  | 0.5673 |
| 44 | Immunoglobulin C1-set domain                | PF07654                                                                                                                      | 98  | 0.5616 |
| 45 | EF hand                                     | PF13202, PF00036, PF09068                                                                                                    | 96  | 0.5501 |
| 46 | 50S ribosome-binding GTPase                 | PF01926                                                                                                                      | 95  | 0.5444 |
| 47 | Helix-loop-helix DNA-binding domain         | PF00010                                                                                                                      | 90  | 0.5158 |
| 48 | Leucine rich repeats (6 copies)             | PF13306                                                                                                                      | 90  | 0.5158 |
| 49 | Calcium-binding EGF domain                  | PF07645                                                                                                                      | 89  | 0.5100 |
| 50 | Helicase conserved C-terminal domain        | PF00271, PF13625                                                                                                             | 89  | 0.5100 |
| 51 | Zinc-finger of C2H2 type                    | PF12874                                                                                                                      | 88  | 0.5043 |
| 52 | AAA domain                                  | PF13476, PF13086, PF13604, PF13087, PF13173, PF13481, PF13304, PF13401, PF13207, PF13238, PF13671, PF13614                   | 87  | 0.4986 |
| 53 | Cadherin domain                             | PF00028                                                                                                                      | 85  | 0.4871 |
| 54 | SAM domain (Sterile alpha motif)            | PF00536, PF07647                                                                                                             | 85  | 0.4871 |
| 55 | Collagen triple helix repeat (20 copies)    | PF01391                                                                                                                      | 84  | 0.4814 |
| 56 | Scavenger receptor cysteine-rich domain     | PF00530                                                                                                                      | 84  | 0.4814 |

|    |                                                                 |                                                                                          |    |        |
|----|-----------------------------------------------------------------|------------------------------------------------------------------------------------------|----|--------|
| 57 | CD80-like C2-set immunoglobulin domain                          | PF08205                                                                                  | 81 | 0.4642 |
| 58 | TPR repeat                                                      | PF13414                                                                                  | 78 | 0.4470 |
| 59 | Elongation factor Tu GTP binding domain                         | PF00009                                                                                  | 75 | 0.4298 |
| 60 | DEAD/DEAH box helicase                                          | PF00270                                                                                  | 73 | 0.4183 |
| 61 | EGF-like domain                                                 | PF00008, PF07974                                                                         | 72 | 0.4126 |
| 62 | Gtr1/RagA G protein conserved region                            | PF04670                                                                                  | 72 | 0.4126 |
| 63 | Receptor family ligand binding region                           | PF01094                                                                                  | 70 | 0.4011 |
| 64 | Trypsin                                                         | PF00089                                                                                  | 70 | 0.4011 |
| 65 | Kelch motif                                                     | PF01344, PF07646, PF13964, PF13854                                                       | 67 | 0.3840 |
| 66 | NACHT domain                                                    | PF05729                                                                                  | 67 | 0.3840 |
| 67 | RhoGAP domain                                                   | PF00620                                                                                  | 65 | 0.3725 |
| 68 | RhoGEF domain                                                   | PF00621                                                                                  | 64 | 0.3668 |
| 69 | Serpentine type 7TM GPCR chemoreceptor Srx                      | PF10328                                                                                  | 64 | 0.3668 |
| 70 | von Willebrand factor type A domain                             | PF13768, PF00092, PF13519                                                                | 64 | 0.3668 |
| 71 | ATPase family associated with various cellular activities (AAA) | PF00004, PF07726                                                                         | 61 | 0.3496 |
| 72 | Protein-tyrosine phosphatase                                    | PF00102                                                                                  | 60 | 0.3438 |
| 73 | 7 transmembrane sweet-taste receptor of 3 GCPR                  | PF00003                                                                                  | 59 | 0.3381 |
| 74 | BTB And C-terminal Kelch                                        | PF07707                                                                                  | 59 | 0.3381 |
| 75 | Thrombospondin type 1 domain                                    | PF00090                                                                                  | 59 | 0.3381 |
| 76 | Calponin homology (CH) domain                                   | PF00307                                                                                  | 58 | 0.3324 |
| 77 | short chain dehydrogenase                                       | PF00106                                                                                  | 58 | 0.3324 |
| 78 | LIM domain                                                      | PF00412                                                                                  | 57 | 0.3266 |
| 79 | Galactose oxidase, central domain                               | PF13418, PF13415                                                                         | 56 | 0.3209 |
| 80 | Methyltransferase domain                                        | PF12847, PF13847, PF13489, PF13659, PF13649, PF08242, PF08241, PF13679, PF13578, PF13383 | 56 | 0.3209 |
| 81 | PHD-finger                                                      | PF00628, PF13831                                                                         | 55 | 0.3152 |
| 82 | Nine Cysteines Domain of family 3 GPCR                          | PF07562                                                                                  | 54 | 0.3095 |
| 83 | Alpha/beta hydrolase family                                     | PF12695, PF12697                                                                         | 52 | 0.2980 |
| 84 | Ion channel                                                     | PF07885                                                                                  | 51 | 0.2923 |
| 85 | Signal recognition particle receptor beta subunit               | PF09439                                                                                  | 50 | 0.2865 |

|     |                                                   |                  |    |        |
|-----|---------------------------------------------------|------------------|----|--------|
| 86  | Laminin G domain                                  | PF02210, PF00054 | 49 | 0.2808 |
| 87  | Lectin C-type domain                              | PF00059          | 49 | 0.2808 |
| 88  | 7 transmembrane receptor (Secretin family)        | PF00002          | 47 | 0.2693 |
| 89  | CUB domain                                        | PF00431          | 47 | 0.2693 |
| 90  | Ligand-binding domain of nuclear hormone receptor | PF00104          | 47 | 0.2693 |
| 91  | Periplasmic binding protein                       | PF13458          | 47 | 0.2693 |
| 92  | Ubiquitin carboxyl-terminal hydrolase             | PF00443, PF13423 | 47 | 0.2693 |
| 93  | Kinesin motor domain                              | PF00225          | 46 | 0.2636 |
| 94  | Mitochondrial carrier protein                     | PF00153          | 46 | 0.2636 |
| 95  | Sugar (and other) transporter                     | PF00083          | 46 | 0.2636 |
| 96  | Cytochrome P450                                   | PF00067          | 45 | 0.2579 |
| 97  | Dual specificity phosphatase, catalytic domain    | PF00782          | 45 | 0.2579 |
| 98  | K <sup>+</sup> channel tetramerisation domain     | PF02214          | 45 | 0.2579 |
| 99  | FERM central domain                               | PF00373          | 44 | 0.2521 |
| 100 | PMP-22/EMP/MP20/Claudin tight junction            | PF13903          | 44 | 0.2521 |

**Supplementary Table IX.2 | Protein domains uniquely present in *C. milii***

| <b>S/N</b> | <b>Protein domain</b>                                    | <b>Percentage of total proteins in elephant shark</b> |
|------------|----------------------------------------------------------|-------------------------------------------------------|
| 1          | 3-Oxoacyl-[acyl-carrier-protein (ACP)] synthase III      | 0.0057                                                |
| 2          | Bacterial transcriptional activator domain               | 0.0057                                                |
| 3          | Cupin                                                    | 0.0115                                                |
| 4          | DinB superfamily                                         | 0.0057                                                |
| 5          | Herpesvirus alkaline exonuclease                         | 0.0057                                                |
| 6          | H-type lectin domain                                     | 0.0057                                                |
| 7          | Leucine-zipper of ternary complex factor MIP1            | 0.0057                                                |
| 8          | Marek's disease glycoprotein A                           | 0.0057                                                |
| 9          | PEP-utilising enzyme, mobile domain                      | 0.0057                                                |
| 10         | PHAT                                                     | 0.0057                                                |
| 11         | Poxvirus D5 protein-like                                 | 0.0115                                                |
| 12         | Putative sugar-binding domain                            | 0.0057                                                |
| 13         | Pyruvate phosphate dikinase, PEP/pyruvate binding domain | 0.0057                                                |
| 14         | RbcX protein                                             | 0.0057                                                |
| 15         | RnfC Barrel sandwich hybrid domain                       | 0.0057                                                |
| 16         | Transcriptional regulatory protein, C terminal           | 0.0057                                                |
| 17         | Tyrosine phosphatase family C-terminal region            | 0.0057                                                |

### Supplementary Table IX.3 | Protein domains present in bony vertebrates but absent in *C. milii*.

Teleosts include zebrafish and stickleback; reptiles include *Anolis* lizard and chicken; mammals include human, mouse, cow and opossum.

| S/N | Protein domain                                                   | Percentage of total proteins |                |          |         |
|-----|------------------------------------------------------------------|------------------------------|----------------|----------|---------|
|     |                                                                  | Teleosts                     | <i>Xenopus</i> | Reptiles | Mammals |
| 1   | Acetyl xylan esterase (AXE1)                                     | 0.0043                       | 0.0054         | 0.0058   | 0.0071  |
| 2   | Acetylcholinesterase tetramerisation domain                      | 0.0043                       | 0.0109         | 0.0058   | 0.0071  |
| 3   | Adenosine deaminase z-alpha domain                               | 0.0064                       | 0.0054         | 0.0029   | 0.0083  |
| 4   | Alanine-glyoxylate amino-transferase                             | 0.0021                       | 0.0054         | 0.0029   | 0.0036  |
| 5   | Aluminium induced protein                                        | 0.0021                       | 0.0054         | 0.0058   | 0.0036  |
| 6   | Binding domain of DNA repair protein Ercc1 (rad10/Swi10)         | 0.0043                       | 0.0054         | 0.0058   | 0.0048  |
| 7   | BRCA2, helical                                                   | 0.0043                       | 0.0054         | 0.0058   | 0.0048  |
| 8   | BRCA2, oligonucleotide/oligosaccharide-binding, domain 1         | 0.0043                       | 0.0054         | 0.0058   | 0.0048  |
| 9   | BRCA2, oligonucleotide/oligosaccharide-binding, domain 3         | 0.0043                       | 0.0054         | 0.0058   | 0.0048  |
| 10  | Brf1-like TBP-binding domain                                     | 0.0085                       | 0.0054         | 0.0058   | 0.0048  |
| 11  | Brinker DNA-binding domain                                       | 0.0064                       | 0.0380         | 0.0116   | 0.0048  |
| 12  | CAAX protease self-immunity                                      | 0.0085                       | 0.0054         | 0.0029   | 0.0048  |
| 13  | CHDNT (NUC034) domain                                            | 0.0149                       | 0.0163         | 0.0145   | 0.0143  |
| 14  | Chromosome passenger complex (CPC) protein INCENP N terminal     | 0.0043                       | 0.0054         | 0.0116   | 0.0036  |
| 15  | Ciliary neurotrophic factor                                      | 0.0043                       | 0.0109         | 0.0145   | 0.0107  |
| 16  | CLN3 protein                                                     | 0.0043                       | 0.0109         | 0.0029   | 0.0048  |
| 17  | COQ9                                                             | 0.0043                       | 0.0054         | 0.0058   | 0.0048  |
| 18  | Dolichol-phosphate mannosyltransferase subunit 3 (DPM3)          | 0.0043                       | 0.0054         | 0.0029   | 0.0048  |
| 19  | DSBA-like thioredoxin domain                                     | 0.0107                       | 0.0109         | 0.0058   | 0.0059  |
| 20  | EMG1/NEP1 methyltransferase                                      | 0.0043                       | 0.0054         | 0.0058   | 0.0036  |
| 21  | Evolutionarily conserved signalling intermediate in Toll pathway | 0.0043                       | 0.0054         | 0.0029   | 0.0048  |
| 22  | Fanconi anemia group F protein (FANCF)                           | 0.0043                       | 0.0054         | 0.0058   | 0.0048  |
| 23  | Fibrinogen alpha C domain                                        | 0.0043                       | 0.0054         | 0.0058   | 0.0048  |
| 24  | Flavodoxin-like fold                                             | 0.0234                       | 0.0054         | 0.0116   | 0.0107  |
| 25  | GIY-YIG catalytic domain                                         | 0.0043                       | 0.0054         | 0.0029   | 0.0059  |

|    |                                                                       |        |        |        |        |
|----|-----------------------------------------------------------------------|--------|--------|--------|--------|
| 26 | Growth arrest and DNA-damage-inducible proteins-interacting protein 1 | 0.0043 | 0.0054 | 0.0029 | 0.0048 |
| 27 | Histone chaperone domain CHZ                                          | 0.0021 | 0.0054 | 0.0029 | 0.0048 |
| 28 | Hormone-sensitive lipase (HSL) N-terminus                             | 0.0085 | 0.0054 | 0.0029 | 0.0048 |
| 29 | Hydantoinase/oxoprolinase                                             | 0.0043 | 0.0054 | 0.0058 | 0.0036 |
| 30 | Hydantoinase/oxoprolinase N-terminal region                           | 0.0043 | 0.0054 | 0.0029 | 0.0036 |
| 31 | Interleukin 11                                                        | 0.0085 | 0.0054 | 0.0029 | 0.0036 |
| 32 | Iron/zinc purple acid phosphatase-like protein C                      | 0.0043 | 0.0054 | 0.0029 | 0.0048 |
| 33 | Jacalin-like lectin domain                                            | 0.0021 | 0.0109 | 0.0087 | 0.0143 |
| 34 | K167R (NUC007) repeat                                                 | 0.0021 | 0.0054 | 0.0029 | 0.0048 |
| 35 | Mandelate racemase / muconate lactonizing enzyme, C-terminal domain   | 0.0043 | 0.0054 | 0.0029 | 0.0036 |
| 36 | Mandelate racemase / muconate lactonizing enzyme, N-terminal domain   | 0.0043 | 0.0054 | 0.0029 | 0.0036 |
| 37 | MazG nucleotide pyrophosphohydrolase domain                           | 0.0043 | 0.0054 | 0.0029 | 0.0048 |
| 38 | Mediator complex subunit 25 synapsin 1                                | 0.0021 | 0.0054 | 0.0058 | 0.0048 |
| 39 | Menin                                                                 | 0.0064 | 0.0054 | 0.0029 | 0.0036 |
| 40 | Methylpurine-DNA glycosylase (MPG)                                    | 0.0043 | 0.0054 | 0.0058 | 0.0048 |
| 41 | Mitochondrial protein from FMP27                                      | 0.0043 | 0.0054 | 0.0058 | 0.0048 |
| 42 | NADH:flavin oxidoreductase / NADH oxidase family                      | 0.0021 | 0.0054 | 0.0029 | 0.0012 |
| 43 | NADPH-dependent FMN reductase                                         | 0.0234 | 0.0054 | 0.0116 | 0.0107 |
| 44 | NIF3 (NGG1p interacting factor 3)                                     | 0.0043 | 0.0054 | 0.0058 | 0.0048 |
| 45 | non-SMC mitotic condensation complex subunit 1, N-term                | 0.0043 | 0.0054 | 0.0058 | 0.0048 |
| 46 | Olfactory receptor                                                    | 0.3749 | 2.1379 | 0.9525 | 4.0990 |
| 47 | Pancreatic ribonuclease                                               | 0.0064 | 0.0054 | 0.0318 | 0.0737 |
| 48 | Peptidase M60-like family                                             | 0.0085 | 0.0217 | 0.0087 | 0.0095 |
| 49 | Pex19 protein family                                                  | 0.0043 | 0.0054 | 0.0029 | 0.0071 |
| 50 | Polynucleotide kinase 3 phosphatase                                   | 0.0043 | 0.0054 | 0.0029 | 0.0048 |
| 51 | PP1-regulatory protein, Phostensin N-terminal                         | 0.0021 | 0.0054 | 0.0058 | 0.0143 |
| 52 | Pregnancy-associated plasma protein-A                                 | 0.0128 | 0.0109 | 0.0116 | 0.0095 |



|    |                                                                  |        |        |        |        |
|----|------------------------------------------------------------------|--------|--------|--------|--------|
| 53 | Prothymosin/parathymosin family                                  | 0.0085 | 0.0109 | 0.0087 | 0.0083 |
| 54 | PTN/MK heparin-binding protein family, C-terminal domain         | 0.0107 | 0.0054 | 0.0116 | 0.0083 |
| 55 | Quinolate phosphoribosyl transferase, C-terminal domain          | 0.0021 | 0.0054 | 0.0029 | 0.0048 |
| 56 | Quinolate phosphoribosyl transferase, N-terminal domain          | 0.0021 | 0.0054 | 0.0029 | 0.0048 |
| 57 | Rab geranylgeranyl transferase alpha-subunit, insert domain      | 0.0043 | 0.0054 | 0.0029 | 0.0048 |
| 58 | Rap1 Myb domain                                                  | 0.0043 | 0.0054 | 0.0029 | 0.0048 |
| 59 | Ribosomal protein L32                                            | 0.0043 | 0.0109 | 0.0029 | 0.0083 |
| 60 | Ribosomal protein S13/S18                                        | 0.0043 | 0.0054 | 0.0029 | 0.0131 |
| 61 | RNA polymerase Rpb1 C-terminal repeat                            | 0.0021 | 0.0054 | 0.0029 | 0.0071 |
| 62 | RNA polymerase Rpb1, domain 6                                    | 0.0043 | 0.0054 | 0.0029 | 0.0048 |
| 63 | RNA polymerase Rpb1, domain 7                                    | 0.0043 | 0.0054 | 0.0029 | 0.0048 |
| 64 | RNA polymerases N / 8 kDa subunit                                | 0.0021 | 0.0109 | 0.0058 | 0.0048 |
| 65 | rRNA small subunit methyltransferase G                           | 0.0043 | 0.0054 | 0.0029 | 0.0048 |
| 66 | SCAN domain                                                      | 0.0170 | 0.0868 | 0.3300 | 0.2247 |
| 67 | Semialdehyde dehydrogenase, NAD binding domain                   | 0.0021 | 0.0109 | 0.0174 | 0.0071 |
| 68 | Seminal vesicle autoantigen (SVA)                                | 0.0192 | 0.0326 | 0.0145 | 0.0190 |
| 69 | Serum albumin family                                             | 0.0021 | 0.0109 | 0.0203 | 0.0214 |
| 70 | Siah interacting protein, N terminal                             | 0.0043 | 0.0054 | 0.0058 | 0.0048 |
| 71 | SLBB domain                                                      | 0.0043 | 0.0054 | 0.0029 | 0.0059 |
| 72 | Sox developmental protein N terminal                             | 0.0234 | 0.0163 | 0.0174 | 0.0143 |
| 73 | Srg family chemoreceptor                                         | 0.0021 | 0.0054 | 0.0029 | 0.0024 |
| 74 | Succinate dehydrogenase/Fumarate reductase transmembrane subunit | 0.0043 | 0.0054 | 0.0029 | 0.0048 |
| 75 | Tellurite resistance protein TehB                                | 0.0107 | 0.0054 | 0.0029 | 0.0012 |
| 76 | Telomere regulation protein Stn1                                 | 0.0021 | 0.0054 | 0.0058 | 0.0048 |
| 77 | TFIIH C1-like domain                                             | 0.0043 | 0.0054 | 0.0058 | 0.0083 |
| 78 | Thrombomodulin like fifth domain, EGF-like                       | 0.0064 | 0.0054 | 0.0029 | 0.0048 |
| 79 | Timeless protein                                                 | 0.0043 | 0.0054 | 0.0029 | 0.0036 |
| 80 | Timeless protein C terminal region                               | 0.0043 | 0.0054 | 0.0029 | 0.0036 |
| 81 | Topoisomerase II-associated protein PAT1                         | 0.0064 | 0.0109 | 0.0087 | 0.0095 |
| 82 | Touch receptor neuron protein Mec-17                             | 0.0043 | 0.0054 | 0.0029 | 0.0119 |
| 83 | Tower                                                            | 0.0043 | 0.0054 | 0.0058 | 0.0048 |
| 84 | Transcription factor Tfb2                                        | 0.0043 | 0.0109 | 0.0029 | 0.0107 |

|    |                                                   |        |        |        |        |
|----|---------------------------------------------------|--------|--------|--------|--------|
| 85 | Transcriptional regulatory protein LGE1           | 0.0064 | 0.0054 | 0.0058 | 0.0059 |
| 86 | Transducer of regulated CREB activity, N terminus | 0.0192 | 0.0109 | 0.0029 | 0.0107 |
| 87 | Translation machinery associated TMA7             | 0.0043 | 0.0054 | 0.0058 | 0.0071 |
| 88 | Trehalase                                         | 0.0043 | 0.0054 | 0.0029 | 0.0048 |
| 89 | UvrD/REP helicase N-terminal domain               | 0.0064 | 0.0054 | 0.0145 | 0.0083 |
| 90 | Vitelline membrane outer layer protein I (VOMI)   | 0.0064 | 0.0109 | 0.0116 | 0.0048 |
| 91 | VWA domain containing CoxE-like protein           | 0.0128 | 0.0054 | 0.0029 | 0.0071 |
| 92 | Zeta toxin                                        | 0.0064 | 0.0217 | 0.0261 | 0.0250 |

**Supplementary Table IX.4 | Protein domains present in *C. milii* and tetrapods but lost in teleosts**

Teleosts include zebrafish, stickleback, medaka and fugu; reptiles include *Anolis* lizard and chicken; mammals include human, mouse, cow and opossum.

| S/N | Protein domain                                                | Percentage of total proteins |                |          |         |
|-----|---------------------------------------------------------------|------------------------------|----------------|----------|---------|
|     |                                                               | Elephant shark               | <i>Xenopus</i> | Reptiles | Mammals |
| 1   | Acyl-CoA reductase (LuxC)                                     | 0.0057                       | 0.0109         | 0.0058   | 0.0155  |
| 2   | Alpha 1,4-glycosyltransferase conserved region                | 0.0115                       | 0.0651         | 0.0116   | 0.0083  |
| 3   | Apolipoprotein B100 C terminal                                | 0.0057                       | 0.0054         | 0.0058   | 0.0036  |
| 4   | Endoplasmic reticulum protein ERp29, C-terminal domain        | 0.0057                       | 0.0054         | 0.0087   | 0.0048  |
| 5   | ERp29, N-terminal domain                                      | 0.0057                       | 0.0054         | 0.0087   | 0.0048  |
| 6   | Fanconi anaemia group A protein                               | 0.0057                       | 0.0054         | 0.0058   | 0.0048  |
| 7   | Formin Homology Region 1                                      | 0.0057                       | 0.0054         | 0.0087   | 0.0083  |
| 8   | Glycosyl transferase family 11                                | 0.0287                       | 0.0217         | 0.0029   | 0.0155  |
| 9   | Glycosyltransferase sugar-binding region containing DXD motif | 0.0115                       | 0.0651         | 0.0116   | 0.0083  |
| 10  | Mis12-Mtw1 protein family                                     | 0.0057                       | 0.0054         | 0.0058   | 0.0048  |
| 11  | piRNA pathway germ-plasm component                            | 0.0057                       | 0.0054         | 0.0058   | 0.0048  |
| 12  | Progesterone receptor                                         | 0.0057                       | 0.0054         | 0.0029   | 0.0036  |
| 13  | Serine-rich domain associated with BRCT                       | 0.0057                       | 0.0054         | 0.0058   | 0.0048  |

**Supplementary Table IX.5 | Protein domains present in *C. milii* and teleosts but lost in tetrapods**

Teleosts include zebrafish and stickleback; tetrapods include *Xenopus*, lizard, chicken and mammals.

| S/N | Protein domain                                        | Percentage of total proteins |          |
|-----|-------------------------------------------------------|------------------------------|----------|
|     |                                                       | Elephant shark               | Teleosts |
| 1   | Helitron helicase-like domain at N-terminus           | 0.0057                       | 0.0107   |
| 2   | Malate/L-lactate dehydrogenase                        | 0.0057                       | 0.0021   |
| 3   | non-haem dioxygenase in morphine synthesis N-terminal | 0.0115                       | 0.0043   |
| 4   | Peptide-N-glycosidase F, C terminal                   | 0.0057                       | 0.0043   |
| 5   | Peptide-N-glycosidase F, N terminal                   | 0.0057                       | 0.0043   |
| 6   | Sea anemone cytotoxic protein                         | 0.0057                       | 0.0085   |

**Supplementary Table X.1 | List of major gene families involved in bone formation in vertebrates**

| Human gene name           | Human protein ID | Elephant shark gene ID | Elephant shark protein ID | Remarks                                                                           |
|---------------------------|------------------|------------------------|---------------------------|-----------------------------------------------------------------------------------|
| <b>Hedgehog signaling</b> |                  |                        |                           |                                                                                   |
| Dispatched                | NP_116279.2      | SINCAMG00000008471     | SINCAMP00000012967        |                                                                                   |
| Scube1                    | NP_766638.2      | -                      | -                         |                                                                                   |
| Scube2                    | NP_001164161.1   | SINCAMG00000006934     | SINCAMP00000010589        |                                                                                   |
| Scube3                    | NP_689966.2      | SINCAMG00000010708     | SINCAMP00000010708        | Conserved synteny with TCP11L1 and ZNF76                                          |
| HHAT                      | NP_060664.2      | SINCAMG00000014826     | SINCAMP00000022770        | Linked to KCNH1                                                                   |
| Gas1                      | NP_002039.2      | SINCAMG00000016790     | SINCAMP00000025879        |                                                                                   |
| Cdo                       | NP_001230526.1   | SINCAMG00000012747     | SINCAMP00000019513        |                                                                                   |
| Ptc1                      | NP_000255.2      | SINCAMG00000008503     | SINCAMP00000013041        |                                                                                   |
| Ptc2                      | NP_001159764.1   | SINCAMG00000008875     | SINCAMP00000013634        |                                                                                   |
| Gpc3                      | NP_001158089.1   | SINCAMG00000014624     | SINCAMP00000022513        | Conserved synteny with HS6ST2, MBNL3 in the 3' end and PHF6, HPRT1 in the 5' end. |
| Smo                       | NP_005622.1      | SINCAMG00000000727     | SINCAMP00000001123        |                                                                                   |
| Kif7                      | NP_940927.2      | SINCAMG00000011775     | SINCAMP00000018064        |                                                                                   |
| Sufu                      | NP_001171604.1   | SINCAMG00000013703     | SINCAMP00000021033        |                                                                                   |
| Gli1                      | NP_001153517.1   | SINCAMG00000011910     | SINCAMP00000018279        |                                                                                   |
| Gli2                      | NP_005261.2      | SINCAMG00000012504     | SINCAMP00000019143        |                                                                                   |
| Gli3                      | NP_000159.3      | SINCAMG00000008696     | SINCAMP00000013329        |                                                                                   |
| HHIP                      | NP_071920.1      | SINCAMG00000005083     | SINCAMP00000007760        |                                                                                   |
| Ihh                       | NP_002172.2      | SINCAMG00000012200     | SINCAMP00000018690        |                                                                                   |
| Evc                       | NP_714928.1      | SINCAMG00000015540     | SINCAMP00000023908        |                                                                                   |
| Evc2                      | NP_001159608.1   | SINCAMG00000015491     | SINCAMP00000023850        |                                                                                   |

| <b>BMP signaling</b>  |                |                                          |                                          |                                                                                                                                                           |
|-----------------------|----------------|------------------------------------------|------------------------------------------|-----------------------------------------------------------------------------------------------------------------------------------------------------------|
| Noggin                | NP_005441.1    | SINCAMG00000016918                       | SINCAMP00000026007                       |                                                                                                                                                           |
| Chordin               | NP_003732.2    | SINCAMG00000006552                       | SINCAMP00000009976                       |                                                                                                                                                           |
| Follistatin           | NP_006341.1    | SINCAMG00000011273                       | SINCAMP00000017319                       |                                                                                                                                                           |
| Gremlin               | NP_037504.1    | SINCAMG00000006221<br>SINCAMG00000017247 | SINCAMP00000009456<br>SINCAMP00000026336 |                                                                                                                                                           |
| Bmp2                  | NP_001191.1    | SINCAMG00000010544                       | SINCAMP00000016184                       |                                                                                                                                                           |
| Bmp4                  | NP_001193.2    | SINCAMG00000006702                       | SINCAMP00000010200                       |                                                                                                                                                           |
| Bmp5                  | NP_066551.1    | SINCAMG00000013534                       | SINCAMP00000020750                       | Confirmed SINCAMG00000013534 by synteny with HMGCLL1 and COL21A1. Removed SINCAMG00000011678 which could be BMP8A based on synteny with MACF1 and NDUFS5. |
| Bmp6                  | NP_001709.1    | SINCAMG00000000807                       | SINCAMP00000001237                       | Found by synteny with TXNDC5 and SNRNP48                                                                                                                  |
| Bmp7                  | NP_001710.1    | SINCAMG00000009190                       | SINCAMP00000014149                       | Found by synteny with SPO11 and RAE1                                                                                                                      |
| Bmpr1a                | NP_004320.2    | SINCAMG00000016451                       | SINCAMP00000025412                       |                                                                                                                                                           |
| Bmpr1b                | NP_001243722.1 | SINCAMG00000005868                       | SINCAMP00000008965                       |                                                                                                                                                           |
| Bmpr2                 | NP_001195.2    | SINCAMG00000010999                       | SINCAMP00000016909                       |                                                                                                                                                           |
| Smad1                 | NP_001003688.1 | SINCAMG00000004379<br>SINCAMG00000005057 | SINCAMP00000006697<br>SINCAMP00000007720 |                                                                                                                                                           |
| Smad4                 | NP_005350.1    | SINCAMG00000000232                       | SINCAMP00000000372                       |                                                                                                                                                           |
| Smad5                 | NP_001001419.1 | SINCAMG00000005235                       | SINCAMP00000007989                       |                                                                                                                                                           |
| Smad6                 | NP_005576.3    | SINCAMG00000010879                       | SINCAMP00000016713                       |                                                                                                                                                           |
| Smad7                 | NP_005895.1    | SINCAMG00000000277                       | SINCAMP00000000443                       |                                                                                                                                                           |
| Smurf1                | NP_065162.1    | SINCAMG00000004299                       | SINCAMP00000006589                       |                                                                                                                                                           |
| Smurf2                | NP_073576.1    | SINCAMG00000003087                       | SINCAMP00000004786                       |                                                                                                                                                           |
| <b>FGF signalling</b> |                |                                          |                                          |                                                                                                                                                           |
| FGF1                  | NP_000791.1    | SINCAMG00000007092                       | SINCAMP00000010808                       |                                                                                                                                                           |

|                              |                |                                                                |                                                                |                                                    |
|------------------------------|----------------|----------------------------------------------------------------|----------------------------------------------------------------|----------------------------------------------------|
| FGF23                        | NP_065689.1    | SINCAMG0000000070                                              | SINCAMP0000000105                                              | Found by synteny with FGF6 and C12orf5             |
| FGF2                         | NP_001997.5    | SINCAMG00000011418                                             | SINCAMP00000017546                                             |                                                    |
| SPRY1                        | NP_001244967.1 | SINCAMG00000016815                                             | SINCAMP00000025904                                             |                                                    |
| SPRY2                        | NP_005833.1    | SINCAMG00000016813                                             | SINCAMP00000025902                                             |                                                    |
| SPRY3                        | NP_005831.1    | SINCAMG00000012081                                             | SINCAMP00000018519                                             | Found by synteny with VAMP7 and TMLHE (scaffold_2) |
| SPRY4                        | NP_112226.2    | SINCAMG00000017659                                             | SINCAMP00000026750                                             |                                                    |
| FGFR1                        | NP_075598.2    | SINCAMG00000011704<br>SINCAMG00000013753                       | SINCAMP00000017959<br>SINCAMP00000021191                       |                                                    |
| FGFR2                        | NP_000132.3    | SINCAMG00000001668                                             | SINCAMP00000002567                                             | Found by synteny with ATE1 and WDR11               |
| FGFR3                        | NP_000133.1    | SINCAMG00000005971                                             | SINCAMP00000009100                                             |                                                    |
| FGFR4                        | NP_002002.3    | SINCAMG00000014055                                             | SINCAMP00000021672                                             |                                                    |
| MAPK1                        | NP_002736.3    | SINCAMG00000013172                                             | SINCAMP00000020187                                             |                                                    |
| MAPK8                        | NP_002741.1    | SINCAMG00000004248                                             | SINCAMP00000006507                                             |                                                    |
| RAF1                         | NP_002871.1    | SINCAMG00000002947                                             | SINCAMP00000004516                                             |                                                    |
| RAC1                         | NP_008839.2    | SINCAMG00000006050<br>SINCAMG00000006052<br>SINCAMG00000013416 | SINCAMP00000009211<br>SINCAMP00000009224<br>SINCAMP00000020554 |                                                    |
| KRAS                         | NP_004976.2    | SINCAMG00000013095                                             | SINCAMP00000020025                                             |                                                    |
| HRAS                         | NP_005334.1    | SINCAMG00000009949                                             | SINCAMP00000015284                                             |                                                    |
| <b>Transcription factors</b> |                |                                                                |                                                                |                                                    |
| Sox5                         | NP_008871.3    | SINCAMG00000015324                                             | SINCAMP00000023607                                             |                                                    |
| Sox6                         | NP_059978.1    | SINCAMG00000006623                                             | SINCAMP00000010101                                             |                                                    |
| Sox9                         | NP_000337.1    | SINCAMG00000017284                                             | SINCAMP00000026373                                             |                                                    |
| Runx2                        | NP_001019801.3 | SINCAMG00000004114                                             | SINCAMP00000006257                                             |                                                    |
| Osterix/sp7                  | NP_001166938.1 | SINCAMG00000017568                                             | SINCAMP00000026659                                             |                                                    |

|                                                                                       |                |                                          |                                          |                                                                                                                             |
|---------------------------------------------------------------------------------------|----------------|------------------------------------------|------------------------------------------|-----------------------------------------------------------------------------------------------------------------------------|
| Bapx1                                                                                 | NP_001180.1    | SINCAMG00000001225<br>SINCAMG00000006458 | SINCAMP00000001872<br>SINCAMP00000009804 | SINCAMG00000006458 is a fragment; possibly both genes are the same gene. SINCAMG00000001225 is syntenic to CPEB2 and RAB28. |
| LIM mineralised protein 1 (LMP-1)/mec-3 homolog/four and a half LIM domain containing | NP_005442.2    | SINCAMG00000014924                       | SINCAMP00000022911                       |                                                                                                                             |
| Sp3                                                                                   | NP_003102.1    | SINCAMG00000000544                       | SINCAMP00000000861                       |                                                                                                                             |
| Atf4                                                                                  | NP_001666.2    | SINCAMG00000010382<br>SINCAMG00000010483 | SINCAMP00000015933<br>SINCAMP00000016078 |                                                                                                                             |
| Twist1                                                                                | NP_000465.1    | SINCAMG00000007976                       | SINCAMP00000012183                       |                                                                                                                             |
| Twist2                                                                                | NP_001258822.1 | SINCAMG00000003851                       | SINCAMP00000005857                       |                                                                                                                             |
| sox8                                                                                  | NP_055402.2    | SINCAMG00000002752                       | SINCAMP00000004204                       |                                                                                                                             |
| Pu.1/ Spi-1                                                                           | NP_001074016.1 | SINCAMG00000012985                       | SINCAMP00000019840                       |                                                                                                                             |
| MITF                                                                                  | NP_937802.1    | SINCAMG00000014146                       | SINCAMP00000021797                       |                                                                                                                             |
| NFATc1                                                                                | NP_006153.2    | SINCAMG00000007254                       | SINCAMP00000011077                       |                                                                                                                             |
| c-FOS                                                                                 | NP_005243.1    | SINCAMG00000009790                       | SINCAMP00000015032                       |                                                                                                                             |
| Msx1                                                                                  | NP_002439.2    | SINCAMG00000015571                       | SINCAMP00000023935                       |                                                                                                                             |
| Msx2                                                                                  | NP_002440.2    | SINCAMG00000000703                       | SINCAMP00000001085                       |                                                                                                                             |
| <b>Differentiation genes</b>                                                          |                |                                          |                                          |                                                                                                                             |
| Matrilin-1                                                                            | NP_002370.1    | SINCAMG00000009781                       | SINCAMP00000015025                       |                                                                                                                             |
| Matrilin-3                                                                            | NP_002372.1    | SINCAMG00000007214                       | SINCAMP00000011003                       |                                                                                                                             |
| Col2a1                                                                                | NP_001835.3    | SINCAMG00000011525<br>SINCAMG00000000850 | SINCAMP00000017882<br>SINCAMP00000001308 |                                                                                                                             |
| Col10a1                                                                               | NP_000484.2    | SINCAMG00000004805                       | SINCAMP00000007366                       |                                                                                                                             |
| Col11a2 (XI alpha                                                                     | NP_542411.2    | SINCAMG00000008728                       | SINCAMP00000013503                       |                                                                                                                             |



|                                                              |             |                                                                                      |                                                                                      |                                                  |
|--------------------------------------------------------------|-------------|--------------------------------------------------------------------------------------|--------------------------------------------------------------------------------------|--------------------------------------------------|
| 1a)                                                          |             |                                                                                      |                                                                                      |                                                  |
| Colla1                                                       | NP_000079.2 | SINCAMG00000013351                                                                   | SINCAMP00000021079                                                                   |                                                  |
| Colla2                                                       | NP_000080.2 | SINCAMG00000012400                                                                   | SINCAMP00000019519                                                                   |                                                  |
| Cox-2<br>(cyclooxygenase-2)                                  | NP_000954.1 | SINCAMG00000015316                                                                   | SINCAMP00000023527                                                                   |                                                  |
| Leptin receptor                                              | NP_002294.2 | SINCAMG00000010469                                                                   | SINCAMP00000016069                                                                   |                                                  |
| MMPI                                                         | NP_002412.1 | SINCAMG00000001350                                                                   | SINCAMP00000002074                                                                   |                                                  |
| Osteocalcin / Bone<br>gamma-<br>carboxylglutamate<br>protein | NP_954642.1 | SINCAMG00000013388                                                                   | SINCAMP00000020498                                                                   |                                                  |
| Alkaline<br>phosphatase                                      | NP_000469.3 | SINCAMG00000007089                                                                   | SINCAMP00000010809                                                                   |                                                  |
| Fam20C                                                       | NP_064608.2 | SINCAMG00000004863<br>SINCAMG00000012860                                             | SINCAMP00000007441<br>SINCAMP00000019666                                             |                                                  |
| Chondroitin sulfate<br>proteoglycan 4                        | NP_001888.2 | SINCAMG00000008980<br>SINCAMG00000011254                                             | SINCAMP00000013791<br>SINCAMP00000017285                                             |                                                  |
| Chondroitin sulfate<br>proteoglycan 5                        | NP_006565.2 | KA353634                                                                             | KA353634                                                                             | Missing from assembly                            |
| galactosamine (N-<br>acetyl)-6-sulfate<br>sulfatase          | NP_000503.1 | SINCAMG00000010142                                                                   | SINCAMP00000015577                                                                   |                                                  |
| Heparan sulfate 2-<br>O-sulfotransferase<br>1, 2, 3          | NP_036394.1 | SINCAMG00000008013<br>SINCAMG00000016544<br>SINCAMG00000016995<br>SINCAMG00000017642 | SINCAMP00000012248<br>SINCAMP00000025558<br>SINCAMP00000026084<br>SINCAMP00000026733 | SINCAMG00000008013 is syntenic to PKN2 and LMO4. |
| Collagenase 3/<br>Matrix                                     | NP_002418.1 | SINCAMG00000013249<br>SINCAMG00000013297                                             | SINCAMP00000020318<br>SINCAMP00000020361                                             |                                                  |

|                                     |                |                                          |                                          |                                                                                                                                                                            |
|-------------------------------------|----------------|------------------------------------------|------------------------------------------|----------------------------------------------------------------------------------------------------------------------------------------------------------------------------|
| metallopeptidase 13                 |                |                                          |                                          |                                                                                                                                                                            |
| Bmp1                                | NP_001190.1    | SINCAMG00000006960                       | SINCAMP00000010637                       |                                                                                                                                                                            |
| Osteocrin                           | NP_937827.1    | SINCAMG00000003547<br>SINCAMG00000007587 | SINCAMP00000005401<br>SINCAMP00000011580 |                                                                                                                                                                            |
| Arachidonate 12-lipoxygenase/ALOX12 | NP_000688.2    | SINCAMG00000005263                       | SINCAMP00000008046                       | ALOX12 is SINCAMG00000005263 (scaffold_584), while ALOX5 is SINCAMG00000003391 (scaffold_126). Relationship is confirmed by NJ tree with human and zebrafish ALOX5 and 12. |
| Calcium-sensing receptor/CaSR       | NP_001171536.1 | SINCAMG00000010557                       | SINCAMP00000016223                       |                                                                                                                                                                            |
| Osteopotenia homolog                | NP_055098.1    | SINCAMG00000015944                       | SINCAMP00000024593                       |                                                                                                                                                                            |
| Sost/Sclerostin                     | NP_079513.1    | SINCAMG00000012988                       | SINCAMP00000019846                       |                                                                                                                                                                            |
| Sostdc1                             | NP_056279.1    | SINCAMG00000008090                       | SINCAMP00000012373                       |                                                                                                                                                                            |
| CRTAP/cartilage associated protein  | NP_006362.1    | SINCAMG00000006872                       | SINCAMP00000010489                       |                                                                                                                                                                            |
| Phospho1                            | NP_001137276.1 | SINCAMG00000006482                       | SINCAMP00000009844                       |                                                                                                                                                                            |
| Phospho2                            | NP_001008489.1 | SINCAMG00000000453                       | SINCAMP00000000731                       |                                                                                                                                                                            |
| ANKH protein/ankylosis protein      | NP_473368.1    | SINCAMG00000008556                       | SINCAMP00000013099                       |                                                                                                                                                                            |
| Atp2b1a                             | NP_001001323.1 | SINCAMG00000013705                       | SINCAMP00000021203                       |                                                                                                                                                                            |
| Cant1                               | NP_001153244.1 | SINCAMG00000002262                       | SINCAMP00000003453                       |                                                                                                                                                                            |
| PHEX                                | NP_000435.3    | SINCAMG00000014306                       | SINCAMP00000022041                       |                                                                                                                                                                            |
| CD44                                | NP_000601.3    | SINCAMG00000009938                       | SINCAMP00000015264                       |                                                                                                                                                                            |
| Chondroadherin                      | NP_001258.2    | SINCAMG00000004002<br>SINCAMG00000011743 | SINCAMP00000006076<br>SINCAMP00000018016 |                                                                                                                                                                            |
| ENPP1 - Ectonucleotide              | NP_006199.2    | SINCAMG00000006314                       | SINCAMP00000009586                       | Labelled as ENPP3 in the genome browser, but confirmed to be ENPP1 by NJ tree.                                                                                             |

|                                                   |                |                                                                |                                                                |                                                                        |
|---------------------------------------------------|----------------|----------------------------------------------------------------|----------------------------------------------------------------|------------------------------------------------------------------------|
| pyrophosphatase/phosphodiesterase family member 1 |                |                                                                |                                                                |                                                                        |
| Entpd5                                            | NP_001240.1    | SINCAMG00000002450                                             | SINCAMP00000003761                                             |                                                                        |
| Sptbn1                                            | NP_003119.2    | SINCAMG00000006476<br>SINCAMG00000013852                       | SINCAMP00000009994<br>SINCAMP00000021579                       |                                                                        |
| Adamts18                                          | NP_955387.1    | SINCAMG00000012186                                             | SINCAMP00000018694                                             |                                                                        |
| Rspo3                                             | NP_116173.2    | SINCAMG00000006603                                             | SINCAMP00000010032                                             |                                                                        |
| Galnt3                                            | NP_004473.2    | SINCAMG00000000219                                             | SINCAMP00000000360                                             |                                                                        |
| Fam3c                                             | NP_001035109.1 | SINCAMG00000009455                                             | SINCAMP00000014556                                             |                                                                        |
| Xylt1                                             | NP_071449.1    | SINCAMG00000015951                                             | SINCAMP00000024585                                             |                                                                        |
| Ext1                                              | NP_000118.2    | SINCAMG00000000630                                             | SINCAMP00000000984                                             | Conserved synteny with MED30 and SAMD12                                |
| Ext2                                              | NP_000392.3    | SINCAMG00000007585                                             | SINCAMP00000011587                                             |                                                                        |
| Extl3                                             | NP_001431.1    | SINCAMG00000009719                                             | SINCAMP00000014926                                             | Conserved synteny with FZD3, INTS9, HMBOX1                             |
| Papst1                                            | NP_835361.1    | SINCAMG00000007847                                             | SINCAMP00000011993                                             |                                                                        |
| Uxs1                                              | NP_001240804.1 | SINCAMG00000009298                                             | SINCAMP00000014319                                             |                                                                        |
| Has2                                              | NP_005319.1    | SINCAMG00000006923                                             | SINCAMP00000010549                                             |                                                                        |
| Mgp                                               | NP_001177768.1 | SINCAMG00000013395                                             | SINCAMP00000020504                                             | Conserved synteny with ERP27 and PDE6H. Adjacent to osteocalcin/BGLAP. |
| <b>Osteoclast regulators</b>                      |                |                                                                |                                                                |                                                                        |
| EGR1                                              | NP_001955.1    | SINCAMG00000008709                                             | SINCAMP00000013366                                             |                                                                        |
| CSF1R                                             | NP_005202.2    | SINCAMG00000010472                                             | SINCAMP00000016088                                             |                                                                        |
| M-CSF/CSF/GM-CSF                                  | NP_000748.3    | -                                                              | -                                                              |                                                                        |
| RANK(TNFRSF11A)                                   | NP_003830.1    | SINCAMG00000003288<br>SINCAMG00000009035<br>SINCAMG00000009040 | SINCAMP00000005005<br>SINCAMP00000013887<br>SINCAMP00000013891 |                                                                        |

|                                              |                |                                                                |                                                                |                                                                           |
|----------------------------------------------|----------------|----------------------------------------------------------------|----------------------------------------------------------------|---------------------------------------------------------------------------|
| RANKL (TNFSF11)                              | NP_003692.1    | SINCAMG00000001809                                             | SINCAMP00000002766                                             | Labelled as TNFSF10-like but confirmed by synteny with AKAP11 and EPSTI1. |
| TNFRSF11B/OPG                                | NP_002537.3    | SINCAMG00000001571                                             | SINCAMP00000002408                                             |                                                                           |
| Mcp1                                         | NP_002973.1    | JW879915<br>SINCAMG00000014559                                 | JW879915<br>SINCAMP00000022338                                 | Two possible orthologs that resemble both Mcp1 (CCL2) and Mcp3 (CCL7).    |
| CCR2                                         | NP_001116513.2 | SINCAMG00000008234<br>SINCAMG00000009465<br>SINCAMG00000009559 | SINCAMP00000012599<br>SINCAMP00000014568<br>SINCAMP00000014697 |                                                                           |
| CCR4                                         | NP_005499.1    | SINCAMG00000006551<br>SINCAMG00000014673<br>SINCAMG00000016780 | SINCAMP00000009950<br>SINCAMP00000022504<br>SINCAMP00000025869 |                                                                           |
| Osteoclast stimulating factor 1              | NP_036515.4    | SINCAMG00000005702                                             | SINCAMP00000008714                                             |                                                                           |
| <b>SPARC, SPARCL1 and related SCPP genes</b> |                |                                                                |                                                                |                                                                           |
| Sparc/Osteonectin                            | NP_003109.1    | SINCAMG00000007163                                             | SINCAMP00000010957                                             |                                                                           |
| Sparcl1                                      | NP_001121782.1 | SINCAMG00000010206                                             | SINCAMP00000015668                                             |                                                                           |
| <b>SIBLING</b>                               |                |                                                                |                                                                |                                                                           |
| DSPP                                         | NP_055023.2    | Not found                                                      |                                                                |                                                                           |
| DMP1                                         | NP_004398.1    | Not found                                                      |                                                                |                                                                           |
| IBSP                                         | NP_004958.2    | Not found                                                      |                                                                |                                                                           |
| MEPE                                         | NP_001171623.1 | Not found                                                      |                                                                |                                                                           |
| SPP1 (OPN)                                   | NP_001238759.1 | Not found                                                      |                                                                |                                                                           |
| <b>P/Q rich SCPP (Enamel)</b>                |                |                                                                |                                                                |                                                                           |
| AMEL                                         | NP_872621.1    | Not found                                                      |                                                                |                                                                           |
| ENAM                                         | NP_114095.2    | Not found                                                      |                                                                |                                                                           |
| AMBN                                         | NP_057603.1    | Not found                                                      |                                                                |                                                                           |
| AMTN                                         | NP_997722.1    | Not found                                                      |                                                                |                                                                           |

|                                   |                |                                          |                                          |                                                                   |
|-----------------------------------|----------------|------------------------------------------|------------------------------------------|-------------------------------------------------------------------|
| ODAM (APIN)                       | NP_060325.3    | Not found                                |                                          |                                                                   |
| <b>Proteoglycans</b>              |                |                                          |                                          |                                                                   |
| Fibronectin                       | NP_002017.1    | SINCAMG00000001164                       | SINCAMP00000001858                       |                                                                   |
| Ileprecan                         | NP_001230175.1 | SINCAMG00000006696                       | SINCAMP00000010226                       |                                                                   |
| Tuftelin                          | NP_064512.1    | SINCAMG00000008225                       | SINCAMP00000012588                       |                                                                   |
| Podocan                           | NP_714914.2    | SINCAMG00000002366<br>SINCAMG00000013633 | SINCAMP00000003624<br>SINCAMP00000020895 |                                                                   |
| <b>SLRP gene family</b>           |                |                                          |                                          |                                                                   |
| Fibromodulin                      | NP_002014.2    | SINCAMG00000009120<br>SINCAMG00000009122 | SINCAMP00000014034<br>SINCAMP00000014037 | Possible duplicates located 1 gene apart in opposite orientation. |
| Prolargin                         | NP_002716.1    | SINCAMG00000009123                       | SINCAMP00000014040                       |                                                                   |
| Opticin                           | NP_055174.1    | SINCAMG00000009121                       | SINCAMP00000014035                       | Based on synteny with FMOD, PRELP and ATP2B4                      |
| Extracellular matrix protein 2    | NP_001384.1    | SINCAMG00000014021                       | SINCAMP00000021532                       |                                                                   |
| Asporin                           | NP_060150.4    | KC707914                                 | KC707914                                 |                                                                   |
| Osteomodulin                      | NP_005005.1    | KC707915                                 | KC707915                                 |                                                                   |
| Osteoglycin/Mimecan               | NP_148935.1    | SINCAMG00000014048                       | SINCAMP00000021567                       |                                                                   |
| Decorin                           | NP_001911.1    | SINCAMG00000013640                       | SINCAMP00000020961                       | SINCAMG00000013640 is syntenic to BTG1 and LUM                    |
| Lumican                           | NP_002336.1    | SINCAMG00000013688                       | SINCAMP00000020965                       |                                                                   |
| Keratocan                         | NP_008966.1    | SINCAMG00000013691                       | SINCAMP00000020972                       |                                                                   |
| Epiphycan                         | NP_004941.2    | SINCAMG00000013696                       | SINCAMP00000020978                       |                                                                   |
| ECM2L                             | XP_003960142.1 | -                                        | -                                        |                                                                   |
| Biglycan                          | NP_001702.1    | JW874743                                 | JW874743                                 | Missing from assembly                                             |
| <b>Lectican/HAPLN gene family</b> |                |                                          |                                          |                                                                   |
| Hyaluronan and                    | NP_068589.1    | JW872610                                 | JW872610                                 |                                                                   |

|                                            |             |                    |                    |  |
|--------------------------------------------|-------------|--------------------|--------------------|--|
| proteoglycan link protein 2                |             |                    |                    |  |
| Brevican                                   | NP_068767.3 | KC707909           | KC707909           |  |
| Versican                                   | NP_004376.2 | SINCAMG00000004695 | SINCAMP00000007216 |  |
| Hyaluronan and proteoglycan link protein 1 | NP_001875.1 | SINCAMG00000004694 | SINCAMP00000007214 |  |
| Aggrecan                                   | NP_037359.3 | SINCAMG00000011028 | SINCAMP00000016953 |  |
| Hyaluronan and proteoglycan link protein 3 | NP_839946.1 | SINCAMG00000011037 | SINCAMP00000016955 |  |
| Neurocan                                   | NP_004377.2 | SINCAMG00000006847 | SINCAMP00000010414 |  |
| Hyaluronan and proteoglycan link protein 4 | NP_075378.1 | SINCAMG00000005547 | SINCAMP00000008481 |  |

## Supplementary Table XI.1 | Genes involved in antigen presentation

| <i>H. sapiens</i> gene | <i>H. sapiens</i> protein | <i>C. milii</i> protein                  | Remarks                                                                                                                                                                                                   |
|------------------------|---------------------------|------------------------------------------|-----------------------------------------------------------------------------------------------------------------------------------------------------------------------------------------------------------|
| CTSS                   | ENSP00000357981           |                                          | not detected in <i>C. milii</i> and <i>G. cirratum</i> databases                                                                                                                                          |
| CTSL1                  | ENSP00000345344           | SINCAMP00000014412                       | Partial sequence is found in Scaffold_202: 800,531-813,636, but there are ~8 genes found in Scaffold_85 as well, one of them may be CTSL2. A total of ~13 genes are present in the <i>C. milii</i> genome |
| CTSL2                  | ENSP00000259470           |                                          | see CTSL1                                                                                                                                                                                                 |
| PSMB10                 | ENSP00000351314           | SINCAMP00000003834                       | Scaffold_1084: 19,439-14,269                                                                                                                                                                              |
| ERAP1                  | ENSP00000296754           |                                          | See ERAP2                                                                                                                                                                                                 |
| ERAP2                  | ENSP00000400376           | SINCAMP00000019922                       | There are three genes in tandem on scaffold_27: 3,636,463-3,650,610; 3,655,296-3,672,395; 3,681,159-3,704,136. Human ERAP1 and ERAP2 genes are also in tandem.                                            |
| TAP1                   | ENSP00000346206           | SINCAMP00000021912                       | Scaffold_5491:31-3,636                                                                                                                                                                                    |
| TAP2                   | ENSP00000364032           |                                          | Not present in <i>C. milii</i> databases, but present in <i>G. cirratum</i> transcriptome (KC814638)                                                                                                      |
| LGMN                   | ENSP00000334052           | SINCAMP00000005108                       | Scaffold_114: 1,861,488-1,851,553                                                                                                                                                                         |
| IFI30                  | ENSP00000384886           | SINCAMP00000009088                       | Scaffold_64: 3,752,082-3,755,990                                                                                                                                                                          |
| POMP                   | ENSP00000370222           | SINCAMP00000014238                       | Scaffold_81: 626,392-610,628                                                                                                                                                                              |
| PSME3                  | ENSP00000466794           | JW876569<br>SINCAMP00000019935           | Scaffold_256: 4,028-929                                                                                                                                                                                   |
| PSME1                  | ENSP00000372155           | JX052270                                 | Scaffold_18508: 459-27                                                                                                                                                                                    |
| PSME2                  | ENSP00000216802           | JW876766                                 | split into three short scaffolds_15485: 437-1,033; 14587: 1110-237; 12568: 1,228-1,142                                                                                                                    |
| PSMB8                  | ENSP00000406878           | SINCAMP00000003812                       | scaffold_1084:966-8810                                                                                                                                                                                    |
| PSMB5                  | ENSP00000355325           | JW876303                                 | AAVX01617944.1                                                                                                                                                                                            |
| PSMB6                  | ENSP00000270586           | SINCAMG00000011687                       | Possibly pseudogene on scaffold_4135:898-1,604; but see JW876745                                                                                                                                          |
| PSMB9                  | ENSP00000363993           |                                          | Not detected in <i>C. milii</i> databnases, but present in <i>G. cirratum</i> transcriptome (KC814632)                                                                                                    |
| PSMB11                 | ENSP00000386212           | SINCAMG00000014611<br>SINCAMG00000002681 | possibly pseudogene; two scaffolds were identified (Scaffold_2497: 1,191-1,875; Scaffold_1219: 9,744-10,417); not present in transcriptomes                                                               |
| ACE                    | ENSP00000290866           | SINCAMP00000003105                       | Scaffold_185: 138,164-115,875                                                                                                                                                                             |
| CD74                   | ENSP00000430614           | SINCAMP00000016296                       | Scaffold_204: 654,822-649,039                                                                                                                                                                             |

## Supplementary Table XI.2 | Pathogen receptors and intracellular signalling components

| <i>H. sapiens</i> gene      | <i>H. sapiens</i> protein | <i>C. milii</i> protein                    | Remarks                                                                                                                              |
|-----------------------------|---------------------------|--------------------------------------------|--------------------------------------------------------------------------------------------------------------------------------------|
| <b>TLR-like receptors</b>   |                           |                                            |                                                                                                                                      |
| TLR1                        | ENSP00000421259           | SINCAMP00000002713                         | TLR1 or TLR6 or TLR10                                                                                                                |
|                             |                           | SINCAMP000000025836                        | TLR1 or TLR6 or TLR10                                                                                                                |
| TLR2                        | ENSP00000260010           | SINCAMP000000026272                        | TLR2 or TLR5                                                                                                                         |
|                             |                           | SINCAMP000000026273                        | TLR2 or TLR5                                                                                                                         |
| TLR3                        | ENSP00000296795           | SINCAMP000000019722                        |                                                                                                                                      |
| TLR4                        | ENSP00000363089           |                                            | not detected; pseudogene fragment related to TLR4 located in syntenic region on scaffold_45 between DBC1 and ASTN2 at nt ~ 3,886,000 |
| TLR5                        | ENSP00000440643           |                                            | see TLR2                                                                                                                             |
| TLR6                        | ENSP00000371376           |                                            | see TLR1                                                                                                                             |
| TLR7                        | ENSP00000370034           | SINCAMP000000026415                        |                                                                                                                                      |
| TLR8                        | ENSP00000312082           | SINCAMP000000026416                        |                                                                                                                                      |
| TLR9                        | ENSP00000353874           | SINCAMP000000004690                        |                                                                                                                                      |
| TLR10                       | ENSP00000308925           |                                            | see TLR1                                                                                                                             |
|                             |                           | SINCAMP000000021648                        | Unclear orthology                                                                                                                    |
|                             |                           | SINCAMP000000026056                        | Unclear orthology                                                                                                                    |
| <b>Signalling molecules</b> |                           |                                            |                                                                                                                                      |
| LBP                         | ENSP00000217407           |                                            | Not detected; however, several BPI homologs are present:<br>SINCAMG000000009082;<br><br>SINCAMG000000009082;<br>SINCAMG000000008957; |
| CD14                        | ENSP00000304236           |                                            | not detected in region syntenic with human genome (scaffold_92: at nt ~ 40,000)                                                      |
| MD-2                        | ENSP00000284818           |                                            | not detected in region syntenic with human genome (scaffold_7: at nt ~ 2,000,000)                                                    |
| MYD88                       | ENSP00000379625           | SINCAMP000000017569                        |                                                                                                                                      |
| TICAM1/TRIF                 | ENSP00000248244           | SINCAMP000000010683                        | Scaffold_83: 2,123,051-2,120,931                                                                                                     |
| TICAM2/TRAM                 | ENSP00000415139           | KC707910                                   | Scaffold_54: 3,008,897-3,009,622                                                                                                     |
| TIRAP                       | ENSP00000279992           | SINCAMP000000018345                        | Scaffold_44: 97,453-99,641                                                                                                           |
| SARM                        | ENSP00000406738           | SINCAMP000000021487                        |                                                                                                                                      |
| TRAF6                       | ENSP00000337853           | SINCAMP000000000213                        |                                                                                                                                      |
| TMEM173/STING               | ENSP00000331288           | SINCAMP000000000648<br>SINCAMP000000000649 | Scaffold_156: 1,377,664-1,370,681 (SINCAMP000000000648 and SINCAMP000000000649 are the same sequence)                                |
| RIPK2                       | ENSP00000220751           | SINCAMP000000000865                        | Scaffold_105: 557,246-512,111                                                                                                        |



|       |                 |                    |                                                                                      |
|-------|-----------------|--------------------|--------------------------------------------------------------------------------------|
| CARD8 | ENSP00000428883 |                    | not detected                                                                         |
| NAIP  | ENSP00000429839 | SINCAMP00000012328 | Scaffold-91: 3,291,033-3,298,496                                                     |
| IRAK1 | ENSP00000358997 | SINCAMP00000006958 | Scaffold_15: 8,101,045-8,089,531                                                     |
| IRAK4 | ENSP00000390651 | SINCAMP00000002110 | Scaffold_133: 1,251,110-1,243,329                                                    |
| TBK1  | ENSP00000329967 | JW863716           | Scaffold_39: 770,168-786,498                                                         |
| IRF3  | ENSP00000470431 | JW870582           | split into two scaffolds;<br>Scaffold_8024:1,865-408 & Scaffold_4730:<br>3,040-1,707 |
| IRF7  | ENSP00000329411 | SINCAMP00000012194 | Scaffold_8024: 1,874-423                                                             |
| MALT1 | ENSP00000376445 | SINCAMP00000001082 | Scaffold_103: 1,483,317-1,507,222                                                    |
| TANK  | ENSP00000376505 | SINCAMP00000000233 | Scaffold_14: 499,943-515,116                                                         |

## Supplementary Table XI.3 | Intracellular pathogen receptors and inflammasome components

| <i>H. sapiens</i> gene                  | <i>H. sapiens</i> protein | <i>C. milii</i> protein                                                                                                                                                  | Remarks                                                                                     |
|-----------------------------------------|---------------------------|--------------------------------------------------------------------------------------------------------------------------------------------------------------------------|---------------------------------------------------------------------------------------------|
| <b>Intracellular pathogen receptors</b> |                           |                                                                                                                                                                          |                                                                                             |
| DHX58                                   | ENSP00000369213           | SINCAMP00000020725                                                                                                                                                       | Scaffold_256: 384,966-392,934                                                               |
| IFIH1                                   | ENSP00000263642           | SINCAMP00000000285                                                                                                                                                       |                                                                                             |
| DDX58                                   | ENSP00000251642           | SINCAMP00000000024                                                                                                                                                       |                                                                                             |
| NOD1                                    | ENSP00000222823           | SINCAMP00000003714                                                                                                                                                       |                                                                                             |
|                                         |                           | SINCAMP00000003723                                                                                                                                                       | Similar to SINCAMP00000003714                                                               |
| NOD2                                    | ENSP00000300589           |                                                                                                                                                                          | Unclear orthology; possibly SINCAMP00000003723                                              |
| <b>Inflammasome components</b>          |                           |                                                                                                                                                                          |                                                                                             |
| NLRP1                                   | ENSP00000324366           | SINCAMP00000025689                                                                                                                                                       | assignment not supported by synteny; sequence possibly incomplete                           |
| NLRP3                                   | ENSP00000337383           | SINCAMP00000014888<br>SINCAMP00000015962<br>SINCAMP00000000673<br>SINCAMP00000010530<br>JW863066<br>JW863420<br>JW863446<br>JW864590<br>JW864704<br>JW874152<br>JW879245 | Altogether 57 NLRP3-like genes were identified. Only 11 representatives are listed here.    |
| IPAF/NLRC4                              | ENSP00000354159           |                                                                                                                                                                          | Not detected in <i>C. milii</i> , but present in <i>G. cirratum</i> transcriptome: KC814625 |
| NLRC5                                   | ENSP00000262510           | SINCAMP00000005561                                                                                                                                                       | Scaffold_189: 586,610-564,330                                                               |
| AIM2                                    | ENSP00000357112           |                                                                                                                                                                          | Not detected                                                                                |
| ASC/PYCARD                              | ENSP00000247470           | KA353642<br>JW877662                                                                                                                                                     | Scaffold_57: 1,447,688-1,447,419                                                            |
| CASP1                                   | ENSP00000410076           | SINCAMP00000018377                                                                                                                                                       | Scaffold_47: 296,823-301,237                                                                |
| IL1B                                    | ENSP00000263341           | SINCAMP00000003504                                                                                                                                                       |                                                                                             |
| IL18                                    | ENSP00000280357           | SINCAMP00000011586                                                                                                                                                       |                                                                                             |

## Supplementary Table XI.4 | Genes involved in the complement system

| <i>H. sapiens</i> gene     | <i>H. sapiens</i> protein | <i>C. milii</i> protein                  | Remarks                                                                                                                                                                                          |
|----------------------------|---------------------------|------------------------------------------|--------------------------------------------------------------------------------------------------------------------------------------------------------------------------------------------------|
| Substrate binding proteins |                           |                                          |                                                                                                                                                                                                  |
| C1QA                       | ENSP00000363773           | JW875837                                 | Gene assignment is arbitrary; There are three C1q genes in tandem in Scaffold_183 (SINCAMP00000001380- 317,277-316,155; SINCAMP00000001383-310,974-309,945; SINCAMP00000001381- 306,228-304,489) |
| C1QB                       | ENSP00000313967           | SINCAMP00000001383<br>JW870590           | See C1QA                                                                                                                                                                                         |
| C1QC                       | ENSP00000363770           | SINCAMP00000001381<br>JX052985           | See C1QA                                                                                                                                                                                         |
| C3                         | ENSP00000245907           | SINCAMP00000012624                       | Scaffold_738: 9,385-36,070                                                                                                                                                                       |
| C4A                        | ENSP00000396688           | SINCAMP00000015348                       | There are two C4 genes and their assignment is arbitrary; Scaffold_276: 34,055-86,869                                                                                                            |
| C4B                        | ENSP00000415941           | SINCAMP00000014484                       | See C4A for gene assignment; Scaffold_296: 341,703-370,982                                                                                                                                       |
| MBL2                       | ENSP00000363079           |                                          | not detected                                                                                                                                                                                     |
| Ligands                    |                           |                                          |                                                                                                                                                                                                  |
| C1R                        | ENSP00000290575           | SINCAMP00000015476<br>SINCAMP00000018513 | There are two C1r genes that are ~28% similar to each other. SINCAMP00000015476 is found in Scaffold_2144: 4,543-10,376, while SINCAMP00000018513 is found in Scaffold_387: 3,561-14,620.        |
| C1RL                       | ENSP00000266542           |                                          | not detected                                                                                                                                                                                     |
| C1s                        | ENSP00000385035           | SINCAMP00000016215<br>JW866600           | There are two C1s genes that are ~31% similar to each other.; SINCAMP00000016215 is located on Scaffold_290: 382,925-373,480.                                                                    |
| C2                         | ENSP00000299367           | JW864721                                 | Part of this sequence found in AAVX01271959.1; best BLAST hit on reverse blast with human C2                                                                                                     |
| BF                         | ENSP00000410815           | JW865377                                 | There are two Bf-like (including JW864721) assigned for C2/Bf based on the similarity to <i>G. cirratum</i> sequences; a fragment of JW865377 is found on Scaffold_16329: 560-384.               |
| CFD                        | ENSP00000332139           |                                          |                                                                                                                                                                                                  |
| MASP1                      | ENSP00000336792           | SINCAMP00000018490                       |                                                                                                                                                                                                  |
| MASP2                      | ENSP00000383690           | SINCAMP00000010528                       | assignment supported by synteny                                                                                                                                                                  |
| Membrane attack complex    |                           |                                          |                                                                                                                                                                                                  |
| C5                         | ENSP00000223642           | SINCAMP00000001718                       | Scaffold_100: 178,210-351,038                                                                                                                                                                    |

|                                    |                 |                                          |                                                                                                                                                                                                                               |
|------------------------------------|-----------------|------------------------------------------|-------------------------------------------------------------------------------------------------------------------------------------------------------------------------------------------------------------------------------|
| C6                                 | ENSP00000263413 | SINCAMP00000014669                       | Scaffold_2701: 8,328-155                                                                                                                                                                                                      |
| C7                                 | ENSP00000322061 | JW870687                                 | Possibly split into two scaffolds;<br>Scaffold_15155: 75-308 &<br>Scaffold_13170: 1,243-609.                                                                                                                                  |
| C8A                                | ENSP00000354458 | SINCAMP00000003517                       | Scaffold_112: 2,367,520-2,358,153                                                                                                                                                                                             |
| C8B                                | ENSP00000360281 | SINCAMP00000003507                       | Scaffold_112: 2,346,130-2,356,566;<br>C8A and B genes are found in tandem<br>in tail-to-tail orientation in both <i>C. milii</i> and human.                                                                                   |
| C8G                                | ENSP00000224181 | SINCAMP00000008133                       | Scaffold_77: 951,256-947,097                                                                                                                                                                                                  |
| C9                                 | ENSP00000263408 | JW867730                                 | Split into three scaffolds:<br>Scaffold_666: 1,069-899 &<br>Scaffold_9346: 57-1,362 &<br>Scaffold_7982: 962-1,108                                                                                                             |
| Regulatory proteins                |                 |                                          |                                                                                                                                                                                                                               |
| CFP                                | ENSP00000380189 | JW870148                                 | Not found on scaffolds                                                                                                                                                                                                        |
| SERPING1                           | ENSP00000278407 | JW873856                                 | Scaffold_4727: 268-4,017                                                                                                                                                                                                      |
| CFI                                | ENSP00000378130 | SINCAMP00000023069                       | Scaffold_269: 99,328-79,965                                                                                                                                                                                                   |
| CFH                                | ENSP00000356399 | SINCAMP00000025042                       | In addition to CFH, the human<br>genome encodes a further 5 CFH-<br>related genes (CFHR1-CFHR5);<br>orthology is uncertain                                                                                                    |
| C4BPA                              | ENSP00000356037 | SINCAMP00000014228                       |                                                                                                                                                                                                                               |
| C4BPB                              | ENSP00000243611 |                                          |                                                                                                                                                                                                                               |
| CD46                               | ENSP00000350893 | SINCAMP00000014229<br>SINCAMP00000026655 | There seems to be multiple (>5) genes<br>in Scaffold_70: some of them are<br>located 3,545,903-3,550,226;<br>3,529,871-3,561,943; and between<br>3,494,241 and 3,561,943. It is not<br>clear all of them are CD46 orthologue. |
| CD55/DAF                           | ENSP00000356031 | SINCAMP00000014220                       |                                                                                                                                                                                                                               |
| CD59                               | ENSP00000340210 |                                          | not detected in <i>C. milii</i> databases;<br>present in <i>G. cirratum</i> transcriptome<br>(KC814621)                                                                                                                       |
| C1qBP                              | ENSP00000225698 | SINCAMP00000021701                       |                                                                                                                                                                                                                               |
| CLU                                | ENSP00000315130 | SINCAMP00000023969                       |                                                                                                                                                                                                                               |
| VTN                                | ENSP00000226218 | SINCAMP00000021550<br>ENSP00000226218    | possibly two VTN-like genes                                                                                                                                                                                                   |
| Complement/anaphylatoxin receptors |                 |                                          |                                                                                                                                                                                                                               |
| CR1/CD35                           | ENSP00000383744 |                                          |                                                                                                                                                                                                                               |
| CR1L                               | ENSP00000421736 |                                          |                                                                                                                                                                                                                               |
| CR2/CD21                           | ENSP00000356025 |                                          |                                                                                                                                                                                                                               |
| ITGAM/CD1<br>1b                    | ENSP00000441691 | JW862483                                 | ITGAM and ITGAX are very similar;<br>assignment of the <i>C. milii</i> transcript is<br>arbitrary                                                                                                                             |
| ITGAX/CD1<br>1c                    | ENSP00000268296 | JW862389                                 | see ITGAM                                                                                                                                                                                                                     |

|                |                 |                    |                                                                      |
|----------------|-----------------|--------------------|----------------------------------------------------------------------|
| ITGB2          | ENSP00000347279 | SINCAMP00000006134 |                                                                      |
| C3AR1          | ENSP00000302079 |                    | see C5AR1                                                            |
| C5AR1/CD8<br>8 | ENSP00000347197 | SINCAMP00000026154 | annotated as C3AR1 in <i>C. milii</i><br>assembly; orthology unclear |

Supplementary Table XI.5 | Chemokines in *C. milii*

| <i>H. sapiens</i> gene | <i>H. sapiens</i> protein | <i>C. milii</i> protein | Remarks                                                              |
|------------------------|---------------------------|-------------------------|----------------------------------------------------------------------|
| <b>CC chemokines</b>   |                           |                         |                                                                      |
| CCL19                  | ENSP00000368077           | SINCAMP00000007281      | CCL19-like?; scaffold_618: 28,517-33,903                             |
|                        |                           | SINCAMP00000025569      | CCL19-like ?; scaffold_1: 12,442,330-12,445,534                      |
|                        |                           | SINCAMP00000025570      | CCL19-like ?; scaffold_1: 12,451,296-12,454,760                      |
|                        |                           | SINCAMP00000025571      | CCL19-like ?; scaffold_1: 12,461,823-12,464,611                      |
|                        |                           | SINCAMP00000007279      | CCL19-like ?; scaffold_618: 18,302-21,011                            |
| CCL20                  | ENSP00000351671           | SINCAMP00000025574      | CCL20-like ?; scaffold_1: 12,502,559-12,504,326                      |
|                        |                           | SINCAMP00000025573      | CCL20-like ?; scaffold_1: 12,489,660-12,491,794                      |
|                        |                           | SINCAMP00000025572      | CCL20-like ?; scaffold_1: 12,475,065-12,476,676                      |
| CCL24                  | ENSP00000222902           | SINCAMP00000022338      |                                                                      |
| CCL25                  | ENSP00000375086           | SINCAMP00000008771      |                                                                      |
|                        |                           | SINCAMP00000025566      | Unclear homology; scaffold_1: 12,404,817-12,408,740                  |
|                        |                           | SINCAMP00000025567      | Unclear homology; scaffold_1: 12,412,827-12,415,963                  |
|                        |                           | SINCAMP00000025568      | Unclear homology; scaffold_1: 12,418,635-12,421,525                  |
|                        |                           | SINCAMP00000014990      | Unclear homology; scaffold_2132: 1,130-2,917                         |
| <b>CXC chemokines</b>  |                           |                         |                                                                      |
| CXCL8                  | ENSP00000306512           | SINCAMP00000013346      |                                                                      |
| CXCL12                 | ENSP00000379140           | SINCAMP00000025277      | scaffold_3: 14,257,952-14,263,963                                    |
|                        |                           | SINCAMP00000025276      | scaffold_3: 14,224,143-14,241,859; duplicated version of CXCL12 gene |
| CXCL14                 | ENSP00000337065           | SINCAMP00000007926      |                                                                      |
| CXCL16                 | ENSP00000460145           | SINCAMP00000017269      |                                                                      |
|                        |                           | SINCAMP00000012935      | scaffold_689: 5,738-8,378; unclear homology                          |
|                        |                           | SINCAMP00000012947      | scaffold_689: 15,580-17,483; unclear homology                        |
|                        |                           | SINCAMP00000014691      | scaffold_2246: 7,195-8,941; unclear homology                         |
|                        |                           | INCAMP00000016228       | scaffold_19: 7,328,783-7,340,338; unclear homology                   |
|                        |                           | SINCAMP00000016232      | scaffold_19: 7,346,620-7,349,535; unclear homology                   |
|                        |                           | SINCAMP00000016234      | scaffold_19: 7,355,924-7,358,930; unclear homology                   |
|                        |                           | SINCAMP00000016225      | scaffold_19: 7,281,632-7,284,526; unclear                            |

|  |  |                    | homology                                                   |
|--|--|--------------------|------------------------------------------------------------|
|  |  | SINCAMP00000025268 | scaffold_3: 14,170,157-14,173,501; related to CXCL9/CXCL10 |
|  |  | SINCAMP00000025270 | scaffold_3: 14,178,344-14,181,991; related to CXCL9/CXCL10 |
|  |  | SINCAMP00000008162 | scaffold_87: 3,288,334-3,291,514; related to CXCL11/CXCL14 |
|  |  | SINCAMP00000008169 | scaffold_87: 3,296,328-3,298,495; related to CXCL11/CXCL14 |
|  |  | SINCAMP00000008173 | scaffold_87: 3,301,114-3,303,079; related to CXCL11/CXCL14 |

**Blue:** homeostatic chemokines; **Red:** inflammatory chemokines **Green:** dual-function chemokines.

No unambiguous orthologues of human CCL1, CCL2, CCL3, CCL3L1, CCL3L3, CCL4, CCL4L1, CCL4L2, CCL5, CCL7, CCL8, CCL11, CCL13, CCL14, CCL15, CCL16, CCL17, CCL18, CCL21, CCL22, CCL23, CCL24, CCL26, CCL27, CCL28, CXCL1, CXCL2, CXCL3, CXCL4, CXCL4L1, CXCL5, CXCL6, CXCL7, CXCL9, CXCL10, CXCL11, CXCL13, CXCL17, XCL1, XCL2, CX3CL1 genes could be detected in *C. milii* genome.

Supplementary Table XI.6 | Chemokine receptors in *C. milii*

| <i>H. sapiens</i> gene | <i>H. sapiens</i> protein | <i>C. milii</i> protein | Remarks                                                                                                                                                                                                                                                       |
|------------------------|---------------------------|-------------------------|---------------------------------------------------------------------------------------------------------------------------------------------------------------------------------------------------------------------------------------------------------------|
| CCR4                   | ENSP00000332659           | SINCAMP00000025869      | Closely related to CCR8                                                                                                                                                                                                                                       |
| CCR6                   | ENSP00000339393           | SINCAMP00000023769      |                                                                                                                                                                                                                                                               |
| CCR7                   | ENSP00000246657           | SINCAMP00000017205      |                                                                                                                                                                                                                                                               |
| CCR9                   | ENSP00000348260           | SINCAMP00000009969      |                                                                                                                                                                                                                                                               |
| CXCR1                  | ENSP00000295683           | SINCAMP00000026575      | Closely related to CXCR2; human genes are situated next to each other on chromosome 2; in <i>C. milii</i> , these two genes occur on different scaffolds (scaffold_407: 127,075-130,083 [SINCAMP00000026575] and scaffold_1109: 1-5,040 [SINCAMP0000002221]). |
| CXCR2                  | ENSP00000319635           |                         | See CXCR1                                                                                                                                                                                                                                                     |
| CXCR4                  | ENSP00000241393           | SINCAMP00000026434      |                                                                                                                                                                                                                                                               |
| CXCR5                  | ENSP00000292174           | SINCAMP00000018503      | Two CXCR5-like genes exist in <i>C. milii</i>                                                                                                                                                                                                                 |
|                        |                           | SINCAMP00000026400      |                                                                                                                                                                                                                                                               |
| CXCR6                  | ENSP00000304414           | SINCAMP00000025870      | Two CXCR6-like genes exist in <i>C. milii</i> (scaffold_83: 374,347-375,432 [SINCAMP00000025870] and scaffold_88: 1,006,050-1,007,186 [SINCAMP00000025828])                                                                                                   |
| CXCR7                  | ENSP00000272928           | SINCAMP00000006060      |                                                                                                                                                                                                                                                               |
| CCRL1                  | ENSP00000249887           | SINCAMP00000025929      |                                                                                                                                                                                                                                                               |
| CCBP2                  | ENSP00000273145           | SINCAMP00000022504      |                                                                                                                                                                                                                                                               |
| XCR1                   | ENSP00000438119           | SINCAMP00000025868      | Two XCR1-like genes exist in <i>C. milii</i> (scaffold_83: 201,892-202,767 [SINCAMP00000025868] and scaffold_83: 314,547-319,885 [SINCAMP00000009950]).                                                                                                       |
|                        |                           | SINCAMP00000026574      | This gene on scaffold_407: 122,146-123,873 has no clear homologue in humans                                                                                                                                                                                   |

**Blue:** receptors for homeostatic chemokines; **Red:** receptors for inflammatory chemokines;

**Green:** receptors for homeostatic, inflammatory and/or dual-function [homeostatic/inflammatory]

Chemokines. No clear orthologues could be detected for human CCR1, CCR2, CCR3, CCR5, CCR8

(closely related to CCR4), CXCR3, CX3CR1, CCRL2, DUFFY/DARC.



Supplementary Table XI.7a | Overview: Cytokines and interleukins in *C. milii*

| Receptor Composition |             |             | Ligand(s)          |
|----------------------|-------------|-------------|--------------------|
| Component 1          | Component 2 | Component 3 |                    |
| IL2RG                | IL2RB       |             | IL2                |
| IL2RG                | IL2RB       | IL2RA       | IL2                |
| IL2RG                | IL2RB       | IL15RA      | IL15               |
| IL2RG                | IL4R        |             | IL4                |
| IL2RG                | IL7R        |             | IL7                |
| IL2RG                | IL9R        |             | IL9                |
| IL2RG                | IL21R       |             | IL21               |
|                      | IL7R        | CRLF2       | TSLP               |
|                      |             |             |                    |
| IL13RA1              |             |             | IL13               |
| IL13RA2              |             |             | IL13               |
| IL13RA1              | IL4R        |             | IL4, IL13          |
|                      |             |             |                    |
| IL6ST                | IL6R        |             | IL6                |
| IL6ST                | IL11RA      |             | IL11               |
| IL6ST                | IL27RA      |             | IL27 (EBI3+IL27)   |
| IL6ST                | LIFR        |             | LIF, CTF1          |
| IL6ST                | OSMR        |             | OSM, IL31          |
| IL6ST                | LIFR        | CNTFR       | CNT (CLCF1+CLF1)   |
| IL31R                | OSMR        |             | IL31               |
|                      |             |             |                    |
| CSF1R                |             |             | CSF1, IL34         |
| CSF2RB               | CSF2RA      |             | CSF2               |
| CSF2RB               | IL3RA       |             | IL3                |
| CSF2RB               | IL5RA       |             | IL5                |
| CSF3R                |             |             | CSF3               |
|                      |             |             |                    |
| IL10RB               | IL10RA      |             | IL10               |
| IL10RB               | IL28RA      |             | IL28A, IL28B, IL29 |
| IL10RB               | IL22RA1     |             | IL22               |
| IL10RB               | IL20RA      |             | IL26               |
| IL20RB               | IL20RA      |             | IL20, IL24, IL19   |
| IL20RB               | IL22RA1     |             | IL24               |
|                      |             |             |                    |
| IL12RB1              | IL12RB2     |             | IL12 (IL12B+IL12A) |

|         |       |  |                    |
|---------|-------|--|--------------------|
| IL12RB1 | IL23R |  | IL23 (IL12B+IL23A) |
|         |       |  |                    |
| FTL3    |       |  | FLT3LG             |
| KIT     |       |  | KITLG              |
|         |       |  |                    |

Colour code: green, orthologue confidently identified; orange, orthologue present in transcriptome database, but not in genome assembly; blue, orthologue may be present, but classification uncertain; grey, not detected and syntenic region also not identified; red, not detected and absent from syntenic region.

## Supplementary Table XI.7b | Interleukin and cytokine receptors

| <i>H. sapiens</i> gene | <i>H. sapiens</i> protein | <i>C. milii</i> protein                                        | Remarks                                                                                                                                                                                                                                                                                                                                      |
|------------------------|---------------------------|----------------------------------------------------------------|----------------------------------------------------------------------------------------------------------------------------------------------------------------------------------------------------------------------------------------------------------------------------------------------------------------------------------------------|
| <b>Receptors</b>       |                           |                                                                |                                                                                                                                                                                                                                                                                                                                              |
| IL1R1                  | ENSP00000386380           | SINCAMP00000014355                                             |                                                                                                                                                                                                                                                                                                                                              |
| IL1RAP                 | ENSP00000072516           | SINCAMP00000014578                                             |                                                                                                                                                                                                                                                                                                                                              |
| IL1R2                  | ENSP00000330959           |                                                                |                                                                                                                                                                                                                                                                                                                                              |
| IL2RA                  | ENSP00000369293           |                                                                | likely absent, see IL15RA; not found in <i>G. cirratum</i> transcriptome                                                                                                                                                                                                                                                                     |
| IL2RB                  | ENSP00000216223           | SINCAMP00000015978                                             |                                                                                                                                                                                                                                                                                                                                              |
| IL2RG                  | ENSP00000363318           | SINCAMP00000025339<br>SINCAMP00000025342                       | local duplication on scaffold_2: 16,442,958-16,450,451 (SINCAMP00000025339) and scaffold_2: 16,451,578-16,464,056 (SINCAMP00000025342); a similar situation occurs in <i>G. cirratum</i> (transcripts KC814626 and KC814631)                                                                                                                 |
| IL3RA                  | ENSP00000327890           |                                                                | may be present on scaffold_18 (see below)                                                                                                                                                                                                                                                                                                    |
| IL4R                   | ENSP00000379111           | SINCAMP00000006430                                             | scaffold_147: 1,516,756-1,525,752; flanking genes, including IL21R are conserved; however, a third interleukin receptor is present                                                                                                                                                                                                           |
| IL5RA                  | ENSP00000256452           |                                                                | may be present on scaffold_18 (see below)                                                                                                                                                                                                                                                                                                    |
| IL6R                   | ENSP00000357470           |                                                                |                                                                                                                                                                                                                                                                                                                                              |
| IL6ST                  | ENSP00000370698           | SINCAMP00000017100<br>SINCAMP00000017111<br>SINCAMP00000017124 | scaffold_22: 5,312,432-5,354,496 (SINCAMP00000017100); scaffold_22: 5,394,661-5,417,010 (SINCAMP00000017111); scaffold_22: 5,418,018-5,464,539 (SINCAMP00000017124); all annotated as IL6ST. This assignment is supported by synteny with the human IL6ST/IL31RA cluster, but three cytokine receptor-like genes are present on scaffold_22. |
| IL7R                   | ENSP00000306157           | JW868881                                                       | So far, identified in <i>C. milii</i> transcript library only; also present in <i>G. cirratum</i> transcript library (KC814633)                                                                                                                                                                                                              |
| IL9R                   | ENSP00000358431           |                                                                | Candidate on scaffold_147: 1,564,089-1,567,854 (SINCAMP00000006439); although annotated as IL9R, this is not supported by synteny. However, BLASTp against human sequences suggests sequence is related to IL21R, IL9R and to a lesser extent IL2RB.                                                                                         |
| IL10RA                 | ENSP00000227752           | SINCAMP00000020946                                             |                                                                                                                                                                                                                                                                                                                                              |
| IL10RB                 | ENSP00000290200           | SINCAMP00000004357                                             |                                                                                                                                                                                                                                                                                                                                              |
| IL11RA                 | ENSP00000326500           | SINCAMP00000001165                                             |                                                                                                                                                                                                                                                                                                                                              |
| IL12RB1                | ENSP00000314425           | SINCAMP00000009045                                             |                                                                                                                                                                                                                                                                                                                                              |
| IL12RB2                | ENSP00000262345           | SINCAMP00000015780                                             | scaffold_252: 389-13,922; assignment supported by sequence and syntenic genes on one side; gene is located at the end of the scaffold; in the human genome, the IL23R gene is linked to the IL12RB2 gene.                                                                                                                                    |
| IL13RA1                | ENSP00000360730           | SINCAMP00000022206                                             | scaffold_2: 9,098,254-9,108,206; annotated as                                                                                                                                                                                                                                                                                                |

| <i>H. sapiens</i> gene | <i>H. sapiens</i> protein | <i>C. milii</i> protein                  | Remarks                                                                                                                                                                                                                                                                                                                                                                                                        |
|------------------------|---------------------------|------------------------------------------|----------------------------------------------------------------------------------------------------------------------------------------------------------------------------------------------------------------------------------------------------------------------------------------------------------------------------------------------------------------------------------------------------------------|
|                        |                           |                                          | IL13RA2, but based on BLAST results and linkage to DOCK11 and WDR44, this is most likely IL13RA1.                                                                                                                                                                                                                                                                                                              |
| IL13RA2                | ENSP00000361004           | SINCAMP00000021159                       | scaffold_2: 8,615,795-8,627,435; although annotated as IL13RA1, BLAST results and linkage to LRCH2 and HTR2A/C suggest that this is most likely IL13RA2. The predicted protein is longer than human IL13RA2, and may have signalling capability.                                                                                                                                                               |
| IL15RA                 | ENSP00000369312           | SINCAMP00000000976                       | scaffold_17: 388,812-420,074; likely represents IL15RA (based on sequence), but region exhibits synteny to the human locus which contains both IL15RA and IL2RA; a related sequence is found in the <i>G. cirratum</i> transcriptome (KC814623).                                                                                                                                                               |
| IL17RA                 | ENSP00000320936           | SINCAMP00000015994                       |                                                                                                                                                                                                                                                                                                                                                                                                                |
| IL17RB                 | ENSP00000288167           | SINCAMP00000005730                       |                                                                                                                                                                                                                                                                                                                                                                                                                |
| IL17RC                 | ENSP00000295981           | SINCAMP00000018499                       |                                                                                                                                                                                                                                                                                                                                                                                                                |
| IL17RD                 | ENSP00000296318           | SINCAMP00000007112                       |                                                                                                                                                                                                                                                                                                                                                                                                                |
| IL17RE                 | ENSP00000295980           |                                          |                                                                                                                                                                                                                                                                                                                                                                                                                |
| IL17REL                | ENSP00000342520           | SINCAMP00000001567                       |                                                                                                                                                                                                                                                                                                                                                                                                                |
| IL20RA                 | ENSP00000314976           | SINCAMP00000024622<br>SINCAMP00000019428 | scaffold_26: 6,773,021-6,792,900 (SINCAMP00000024622); assignment is supported by sequence and synteny. A potential second IL20RA-like gene appears on scaffold_2: 4,260,224-4,278,160 (SINCAMP00000019428); annotated as IL20RA, but there is no synteny conservation with the human IL20RA locus; BLASTp suggest this to be additional copy of either IL20RA or IL22R. See also analysis of IFN gene family. |
| IL20RB                 | ENSP00000328133           | SINCAMP00000025423                       | scaffold_1: 9,304,161-9,320,889; annotated as IL20RB, but there is no synteny conservation with the human IL20RA locus.                                                                                                                                                                                                                                                                                        |
| IL21R                  | ENSP00000338010           | SINCAMP00000006436                       |                                                                                                                                                                                                                                                                                                                                                                                                                |
| IL22RA1                | ENSP00000270800           | SINCAMP00000014733                       |                                                                                                                                                                                                                                                                                                                                                                                                                |
| IL22RA2                | ENSP00000296980           | SINCAMP00000024615<br>SINCAMP00000024618 | scaffold_26: 6,748,991-6,751,747 (SINCAMP00000024615); scaffold_26: 6,758,402-6,762,933 (SINCAMP00000024618); both annotated as IL22RA2, which is supported by synteny, but a second IL22RA2-like gene appears to be present. These genes are part of the human locus that contains the IFNGR1/IL22RA2/IL20RA genes.                                                                                           |
| IL23R                  | ENSP00000321345           |                                          |                                                                                                                                                                                                                                                                                                                                                                                                                |
| IL27RA                 | ENSP00000263379           | SINCAMP00000016756                       | annotated as IL12RB2, but linked gene RLN3 suggests that this gene may be the equivalent of human IL27R.                                                                                                                                                                                                                                                                                                       |
| IL31RA                 | ENSP00000415900           |                                          | likely absent, but potentially present on scaffold_22 (see IL6ST)                                                                                                                                                                                                                                                                                                                                              |
| CNTFR                  | ENSP00000368265           | SINCAMP00000001166                       |                                                                                                                                                                                                                                                                                                                                                                                                                |
| CRLF1                  | ENSP00000376188           | SINCAMP00000008821                       |                                                                                                                                                                                                                                                                                                                                                                                                                |
| CRLF2 (TSLPR)          | ENSP00000383641           |                                          | may be present on scaffold_18 (see below)                                                                                                                                                                                                                                                                                                                                                                      |

| <i>H. sapiens</i> gene | <i>H. sapiens</i> protein | <i>C. milii</i> protein | Remarks                                                                                                                                                                                 |
|------------------------|---------------------------|-------------------------|-----------------------------------------------------------------------------------------------------------------------------------------------------------------------------------------|
| CSF1R                  | ENSP00000286301           | SINCAMP00000016088      |                                                                                                                                                                                         |
| CSF2RA                 | ENSP00000394227           |                         | may be present on scaffold_18 (see below)                                                                                                                                               |
| CSF2RB                 | ENSP00000262825           | SINCAMP00000016009      |                                                                                                                                                                                         |
| CSF3R                  | ENSP00000362195           |                         | absent from syntenic region, potential hit on scaffold_64: 3,989,408-3,997,431 (SINCAMP00000009149)                                                                                     |
| FLT3                   | ENSP00000241453           | SINCAMP00000014257      |                                                                                                                                                                                         |
| KIT                    | ENSP00000288135           | SINCAMP00000018568      |                                                                                                                                                                                         |
| LIFR                   | ENSP00000263409           | SINCAMP00000020153      |                                                                                                                                                                                         |
| OSMR                   | ENSP00000274276           |                         | not found; this gene is linked to LIFR in the human genome; however, scaffold_329 is very short                                                                                         |
|                        |                           | SINCAMP00000004531      | scaffold_18: 373,875-396,948; annotated as IL5RA, located in a cluster of 5 cytokine receptor-like genes, in a region of strongly conserved synteny to human CRLF2/CSF2RA/IL3RA locus.  |
|                        |                           | SINCAMP00000004537      | scaffold_18: 406,745-415,193; annotated as IL2RG, located in a cluster of 5 cytokine receptor-like genes, in a region of strongly conserved synteny to human CRLF2/CSF2RA/IL3RA locus.  |
|                        |                           | SINCAMP00000004543      | scaffold_18: 428,106-443,452; annotated as IL2RG, located in a cluster of 5 cytokine receptor-like genes, in a region of strongly conserved synteny to human CRLF2/CSF2RA/IL3RA locus.  |
|                        |                           | SINCAMP00000004549      | scaffold_18: 522,558-534,051; annotated as CSF2RA, located in a cluster of 5 cytokine receptor-like genes, in a region of strongly conserved synteny to human CRLF2/CSF2RA/IL3RA locus. |
|                        |                           | SINCAMP00000004574      | scaffold_18: 559,144-658,702; annotated as IL2RG, located in a cluster of 5 cytokine receptor-like genes, in a region of strongly conserved synteny to human CRLF2/CSF2RA/IL3RA locus.  |

## Supplementary Table XI.7c | Interleukins, cytokines and ligands

| <i>H. sapiens</i> gene | <i>H. sapiens</i> protein | <i>C. milii</i> protein                  | Remarks                                                                                                                                                                                                                                                                                                                                                          |
|------------------------|---------------------------|------------------------------------------|------------------------------------------------------------------------------------------------------------------------------------------------------------------------------------------------------------------------------------------------------------------------------------------------------------------------------------------------------------------|
| <b>Ligands</b>         |                           |                                          |                                                                                                                                                                                                                                                                                                                                                                  |
| CLCF1                  | ENSP00000434122           |                                          |                                                                                                                                                                                                                                                                                                                                                                  |
| CNTF                   | ENSP00000355370           |                                          |                                                                                                                                                                                                                                                                                                                                                                  |
| CRLF1                  | ENSP00000376188           | SINCAMP00000008821                       |                                                                                                                                                                                                                                                                                                                                                                  |
| CSF1                   | ENSP00000327513           |                                          |                                                                                                                                                                                                                                                                                                                                                                  |
| CSF2                   | ENSP00000296871           |                                          |                                                                                                                                                                                                                                                                                                                                                                  |
| CSF3                   | ENSP00000225474           | SINCAMP00000017148                       | scaffold_251: 60,582-61,495; partial sequence only, but assignment supported by synteny.                                                                                                                                                                                                                                                                         |
| CTF1                   | ENSP00000279804           |                                          |                                                                                                                                                                                                                                                                                                                                                                  |
| FLT3LG                 | ENSP00000204637           |                                          |                                                                                                                                                                                                                                                                                                                                                                  |
| KITLG                  | ENSP00000228280           | SINCAMP00000021317                       |                                                                                                                                                                                                                                                                                                                                                                  |
| IL1A                   | ENSP00000263339           |                                          | No BLAST hit                                                                                                                                                                                                                                                                                                                                                     |
| IL1B                   | ENSP00000263341           | SINCAMP00000003504                       |                                                                                                                                                                                                                                                                                                                                                                  |
| IL2                    | ENSP00000226730           |                                          | Absent from syntenic region; no BLAST hit; also absent from <i>G. cirratum</i> transcriptomes.                                                                                                                                                                                                                                                                   |
| IL3                    | ENSP00000296870           |                                          | Absent from syntenic region, but scaffold has gaps                                                                                                                                                                                                                                                                                                               |
| IL4                    | ENSP00000231449           |                                          | Absent from syntenic region; no BLAST hit                                                                                                                                                                                                                                                                                                                        |
| IL5                    | ENSP00000231454           |                                          | Absent from syntenic region; no BLAST hit                                                                                                                                                                                                                                                                                                                        |
| IL6                    | ENSP00000385675           | SINCAMP00000024395<br>SINCAMP00000024402 | Duplicated in elephant shark                                                                                                                                                                                                                                                                                                                                     |
| IL7                    | ENSP00000263851           | SINCAMP00000024043                       | identified by synteny (IL7 gene overlaps the ZC2HC1A gene); identified in <i>G. cirratum</i> transcriptome (KC814622)                                                                                                                                                                                                                                            |
| IL9                    | ENSP00000274520           |                                          | Absent from syntenic region; no BLAST hit                                                                                                                                                                                                                                                                                                                        |
| IL10                   | ENSP00000412237           | SINCAMP00000014174                       | scaffold_70: 3,215,896-3,221,395; note that this scaffold contains a total of 3 cytokine genes, while the equivalent human locus contains 4 cytokine genes (IL10, IL19, IL20 and IL24).                                                                                                                                                                          |
| IL11                   | ENSP00000264563           |                                          |                                                                                                                                                                                                                                                                                                                                                                  |
| IL12A                  | ENSP00000303231           |                                          | Absent from syntenic region; no BLAST hit                                                                                                                                                                                                                                                                                                                        |
| IL12B (p40)            | ENSP00000231228           | SINCAMP00000015768<br>SINCAMP00000018511 | scaffold_19: 3,370,635-3,375,004 (SINCAMP00000015768); assignment supported by one closely linked gene and generally conserved synteny. scaffold_198: 312,760-316,682 appears to contain a second version of IL12B (SINCAMP00000018511); this copy is located on a short scaffold and linked to the DOCK2, FAM196B genes, which are also present on scaffold_19. |
| IL13                   | ENSP00000304915           |                                          | Absent from syntenic region                                                                                                                                                                                                                                                                                                                                      |
| IL15                   | ENSP00000296545           | SINCAMP00000011712                       | Also identified in <i>G. cirratum</i> transcriptome (KC814629)                                                                                                                                                                                                                                                                                                   |

|              |                 |                    |                                                                                                                                                                                                                                                                                                                                                             |
|--------------|-----------------|--------------------|-------------------------------------------------------------------------------------------------------------------------------------------------------------------------------------------------------------------------------------------------------------------------------------------------------------------------------------------------------------|
| IL17A        | ENSP00000344192 |                    | IL17A and IL17F are very similar; two related genes are found in the <i>C. milii</i> genome (SINCAMP00000016734 and SINCAMP00000017945)                                                                                                                                                                                                                     |
| IL17B        | ENSP00000261796 |                    | IL17B and IL17D are very similar; two related genes are found in <i>C. milii</i> (SINCAMP00000019791 and SINCAMP00000004112)                                                                                                                                                                                                                                |
| IL17C        | ENSP00000244241 | SINCAMP00000015534 |                                                                                                                                                                                                                                                                                                                                                             |
| IL17D        | ENSP00000302924 |                    | IL17B and IL17D are very similar; two related genes are found in <i>C. milii</i> (SINCAMP00000019791 and SINCAMP00000004112)                                                                                                                                                                                                                                |
| IL17E/IL25   | ENSP00000328111 |                    | not detected                                                                                                                                                                                                                                                                                                                                                |
| IL17F        | ENSP00000337432 |                    | IL17A and IL17F are very similar; two related genes are found in the <i>C. milii</i> genome (SINCAMP00000016734 and SINCAMP00000017945)                                                                                                                                                                                                                     |
| IL18         | ENSP00000280357 | SINCAMP00000011586 |                                                                                                                                                                                                                                                                                                                                                             |
| IL19         | ENSP00000343000 |                    | Apart from IL10, scaffold_70 contains two additional related genes (scaffold_70: 3,248,099-3,250,677 [SINCAMP00000014175] and scaffold_70: 3,257,735-3,259,786 [SINCAMP00000014177]; both are annotated as IL24. Note that this scaffold contains 3 cytokine genes, while the equivalent human locus contains 4 cytokine genes (IL10, IL19, IL20 and IL24). |
| IL20         | ENSP00000356063 |                    | Apart from IL10, scaffold_70 contains two additional related genes (scaffold_70: 3,248,099-3,250,677 [SINCAMP00000014175] and scaffold_70: 3,257,735-3,259,786 [SINCAMP00000014177]; both are annotated as IL24. Note that this scaffold contains 3 cytokine genes, while the equivalent human locus contains 4 cytokine genes (IL10, IL19, IL20 and IL24). |
| IL21         | ENSP00000264497 |                    | Absent from syntenic region; no BLAST hit; absent from <i>G. cirratum</i> transcriptomes                                                                                                                                                                                                                                                                    |
| IL22         | ENSP00000329384 | SINCAMP00000002010 |                                                                                                                                                                                                                                                                                                                                                             |
| IL23A (p19)  | ENSP00000228534 |                    |                                                                                                                                                                                                                                                                                                                                                             |
| IL24         | ENSP00000294984 |                    | Apart from IL10, scaffold_70 contains two additional related genes (scaffold_70: 3,248,099-3,250,677 [SINCAMP00000014175] and scaffold_70: 3,257,735-3,259,786 [SINCAMP00000014177]; both are annotated as IL24. Note that this scaffold contains 3 cytokine genes, while the equivalent human locus contains 4 cytokine genes (IL10, IL19, IL20 and IL24). |
| IL26         | ENSP00000229134 |                    | Likely absent from IFNG/IL22 locus                                                                                                                                                                                                                                                                                                                          |
| IL27 (p28)   | ENSP00000349365 |                    |                                                                                                                                                                                                                                                                                                                                                             |
| IL31         | ENSP00000366234 |                    | Absent from syntenic region; no BLAST hit                                                                                                                                                                                                                                                                                                                   |
| IL34         | ENSP00000288098 | SINCAMP00000003055 |                                                                                                                                                                                                                                                                                                                                                             |
| EBI3 (IL27B) | ENSP00000221847 | SINCAMP00000010280 |                                                                                                                                                                                                                                                                                                                                                             |

|       |                 |                                          |                                                                                                                                                                                                                              |
|-------|-----------------|------------------------------------------|------------------------------------------------------------------------------------------------------------------------------------------------------------------------------------------------------------------------------|
| LIF   | ENSP00000249075 | SINCAMP00000007825                       | scaffold_94: 1,383,634-1,386,116; no annotation, but BLASTp and syntenic genes indicate that this is LIF. In the human genome, LIF and OSM are neighbours, but only a single cytokine-like gene is present on this scaffold. |
| OSM   | ENSP00000215781 |                                          | Absent from syntenic region on scaffold_94; no BLAST hit                                                                                                                                                                     |
| TSLP  | ENSP00000339804 |                                          | Not detected                                                                                                                                                                                                                 |
| TGFB1 | ENSP00000221930 |                                          | JW872116;<br>fragment on scaffold_19954                                                                                                                                                                                      |
| TGFB2 | ENSP00000092961 | SINCAMP00000004915<br>SINCAMP00000016426 | SINCAMP00000004915 assignment supported by synteny; scaffold_125: 1,335,119-1,390,302. SINCAMP00000016426 may be duplicated TGFB2-like gene.                                                                                 |
| TGFB3 | ENSP00000238682 |                                          | KC795563;<br>fragment on scaffold_17347                                                                                                                                                                                      |



Supplementary Table XI.8 | Tumour Necrosis Factor Ligand and Receptor Superfamilies

| <i>H. sapiens</i> gene | <i>H. sapiens</i> protein | <i>C. mili</i> protein | Remarks                                                                                                                                                                                                                                                                                                                                                                                                                                                                                   |
|------------------------|---------------------------|------------------------|-------------------------------------------------------------------------------------------------------------------------------------------------------------------------------------------------------------------------------------------------------------------------------------------------------------------------------------------------------------------------------------------------------------------------------------------------------------------------------------------|
| TNFRSF1A               | ENSP00000162749           | SINCAMP00000017647     | may be present on scaffold_317: 91,489-96,623: annotated as TNFRSF14, however this is not supported by syntenic evidence, which suggests that this is a potential orthologue of TNFRSF1A or TNFRSF3; the gene is flanked by genes that map to <i>H. sapiens</i> chromosome 12q13, although they are not immediate neighbours to the <i>H. sapiens</i> TNFRSF1A or TNFRSF3 genes.                                                                                                          |
| TNFRSF1B               | ENSP00000365435           | SINCAMP00000011509     | identified by synteny and phylogeny                                                                                                                                                                                                                                                                                                                                                                                                                                                       |
| TNFRSF3 (LTBR)         | ENSP00000228918           |                        | see TNFRSF1A                                                                                                                                                                                                                                                                                                                                                                                                                                                                              |
| TNFRSF4 (OX-40, CD134) | ENSP00000368538           |                        | may be present on scaffold_176: 383,470-386,989; annotated TNFRSF11A, however this is not supported by synteny. This scaffold is syntenic with <i>H. sapiens</i> chromosome 1p36.33, which contains the genes TNFRSF4 and TNFRSF18                                                                                                                                                                                                                                                        |
| TNFRSF5 (CD40)         | ENSP00000361359           |                        | three potential candidates on scaffold_6: 6,846,214-6,857,904 (SINCAMP00000013887; this is annotated as TNFRSF11A, however this is not supported by syntenic evidence); scaffold_6: 6,867,950-6,876,790 (SINCAMP00000013895); scaffold_6: 6,884,069-6,898,430 (SINCAMP00000013897): this scaffold shows clear synteny with <i>H. sapiens</i> chromosome 20q13.12, which contains the TNFRSF5 gene; however, the <i>C. mili</i> locus contains 3 TNFRSF genes, all are TNFRSF5 candidates. |
| TNFRSF6 (Fas.CD95)     | ENSP00000347979           | SINCAMP00000021843     | identified by synteny and phylogeny                                                                                                                                                                                                                                                                                                                                                                                                                                                       |
| TNFRSF6B (DcR3)        | ENSP00000359013           | SINCAMP00000013141     | identified by synteny and phylogeny                                                                                                                                                                                                                                                                                                                                                                                                                                                       |
| TNFRSF7 (CD27)         | ENSP00000266557           |                        | syntenic region not identified, no BLAST hit                                                                                                                                                                                                                                                                                                                                                                                                                                              |
| TNFRSF8 (CD30)         | ENSP00000263932           | SINCAMP00000011502     | identified by synteny and phylogeny                                                                                                                                                                                                                                                                                                                                                                                                                                                       |
| TNFRSF9 (4-1BB)        | ENSP00000366729           | SINCAMP00000011609     | likely present on scaffold_93: 2,393,004-2,400,059; however, although annotated as TNFRSF9, note that this scaffold is generally syntenic with <i>H. sapiens</i> chromosome 1p36.33-p36.22, which contains both TNFRSF9 and TNFRSF14 genes                                                                                                                                                                                                                                                |

| <i>H. sapiens</i> gene                                        | <i>H. sapiens</i> protein | <i>C. mili</i> protein | Remarks                                                                                                                                                                                                                                                                  |
|---------------------------------------------------------------|---------------------------|------------------------|--------------------------------------------------------------------------------------------------------------------------------------------------------------------------------------------------------------------------------------------------------------------------|
| TNFRSF10A (DR4)                                               | ENSP00000221132           |                        | syntenic region not identified, flanking genes are spread over several short scaffolds, no BLAST hit                                                                                                                                                                     |
| TNFRSF10B (DR5)                                               | ENSP00000276431           |                        | syntenic region not identified, flanking genes are spread over several short scaffolds, no BLAST hit                                                                                                                                                                     |
| TNFRSF10C (DcR1)                                              | ENSP00000349324           |                        | syntenic region not identified, flanking genes are spread over several short scaffolds, no BLAST hit                                                                                                                                                                     |
| TNFRSF10D (DcR2)                                              | ENSP00000310263           |                        | syntenic region not identified, flanking genes are spread over several short scaffolds, no BLAST hit                                                                                                                                                                     |
| TNFRSF11A (RANK)                                              | ENSP00000269485           | SINCAMP00000022509     | identified by synteny and phylogeny                                                                                                                                                                                                                                      |
| TNFRSF11B (OPG)                                               | ENSP00000297350           | SINCAMP00000002408     | identified by synteny and phylogeny                                                                                                                                                                                                                                      |
| TNFRSF12A                                                     | ENSP00000326737           |                        | syntenic region not identified, not BLAST hit                                                                                                                                                                                                                            |
| TNFRSF13B (TACI)                                              | ENSP00000261652           | SINCAMP00000019332     | one linked gene, ambiguous phylogeny                                                                                                                                                                                                                                     |
| TNFRSF13C (BAFF-R)                                            | ENSP00000291232           |                        | syntenic region not identified, no BLAST hit                                                                                                                                                                                                                             |
| TNFRSF14 (HVEM)                                               | ENSP00000347948           | SINCAMP00000011984     | likely present on scaffold_93: 3,284,965-3,296,018; however, although annotated as TNFRSF14, note that this scaffold is generally syntenic with <i>H. sapiens</i> chromosome 1p36.33-p36.22, which contains both TNFRSF9 and TNFRSF14 genes                              |
| TNFRSF16 (NGFR)                                               | ENSP00000172229           | SINCAMP00000009871     | identified by synteny and phylogeny                                                                                                                                                                                                                                      |
| TNFRSF17 (BCMA)                                               | ENSP00000053243           | SINCAMP000000023620    | identified by synteny and phylogeny                                                                                                                                                                                                                                      |
| TNFRSF18 (GITR)                                               | ENSP00000368570           |                        | see TNFRSF4 (OX-40, CD134)                                                                                                                                                                                                                                               |
| TNFRSF19                                                      | ENSP00000371693           | SINCAMP00000014331     | identified by synteny and phylogeny                                                                                                                                                                                                                                      |
| TNFRSF19L (RELT)                                              | ENSP00000064780           | SINCAMP00000006225     | identified by synteny and phylogeny                                                                                                                                                                                                                                      |
| TNFRSF21 (DR6)                                                | ENSP00000296861           | SINCAMP00000009531     | identified by synteny (one linked gene) and phylogeny                                                                                                                                                                                                                    |
| TNFRSF25 (DR3)                                                | ENSP00000349341           | SINCAMP00000011512     | identified by synteny (one linked gene)                                                                                                                                                                                                                                  |
| <b><i>TNFR</i> gene family members with unclear orthology</b> |                           |                        |                                                                                                                                                                                                                                                                          |
|                                                               |                           | SINCAMP00000025459     | located on scaffold_2: 16,799,375-16,804,852; annotated as TNFRSF19, which is supported by phylogenetic but not syntenic evidence; because this scaffold generally exhibits syteny with the <i>H. sapiens</i> chromosome X, a gene on scaffold_81 is better supported as |

| <i>H. sapiens</i> gene | <i>H. sapiens</i> protein | <i>C. milii</i> protein | Remarks                                                                                                                                                                                                                                                                                                                                                                                                                        |
|------------------------|---------------------------|-------------------------|--------------------------------------------------------------------------------------------------------------------------------------------------------------------------------------------------------------------------------------------------------------------------------------------------------------------------------------------------------------------------------------------------------------------------------|
|                        |                           |                         | the true TNFRSF19 orthologue. Hence, this is possibly the result of a TNFRSF19 duplication.                                                                                                                                                                                                                                                                                                                                    |
|                        |                           | SINCAMP00000001420      | scaffold_183: 613,185-620,272; annotated as TNFRSF14; this region is generally syntenic with <i>H. sapiens</i> chromosome 1p36.1-p33, which contains the human TNFRSF14 gene. The entire scaffold contains three TNFRSF genes that cannot be confidently identified by direct synteny.                                                                                                                                         |
|                        |                           | SINCAMP00000001426      | scaffold_183: 624,938-635,267; annotated as CD40 (TNFRSF5); however this is not supported by syntenic evidence (the human TNFRSF5 gene is located on chromosome 20q12-q13.2). This region of scaffold_183 is generally syntenic with <i>H. sapiens</i> chromosome 1p36.1-p33, which contains the human TNFRSF14 gene. The entire scaffold contains three TNFRSF genes that cannot be confidently identified by direct synteny. |
|                        |                           | SINCAMP00000001427      | scaffold_183: 639,657-643,484; annotated as TNFRSF14; this region is generally syntenic with <i>H. sapiens</i> chromosome 1p36.1-p33, which contains the human TNFRSF14 gene. The entire scaffold contains three TNFRSF genes that cannot be confidently identified by direct synteny.                                                                                                                                         |
|                        |                           | SINCAMP00000003806      | scaffold_186: 977,404-982,181                                                                                                                                                                                                                                                                                                                                                                                                  |
|                        |                           | SINCAMP00000002421      | scaffold_187: 881,959-888,494; annotated as TNFRSF6B, which is supported by phylogenetic, but not by syntenic evidence. Based on synteny, this may be a duplicated TNFRSF11B gene.                                                                                                                                                                                                                                             |
|                        |                           | SINCAMP000000017647     | scaffold_317: 91,489-96,623; annotated as TNFRSF14; however, this is not supported by syntenic evidence, which rather suggests that this is a potential orthologue of TNFRSF1A or TNFRSF3. This gene is flanked by genes that map to <i>H. sapiens</i> chromosome 12q13, although they are not immediate neighbours to the <i>H. sapiens</i> TNFRSF1A or TNFRSF3 genes.                                                        |
|                        |                           | SINCAMP000000017342     | scaffold_2235: 2,243-8,778; annotated as TNFRSF14. Its location on single gene scaffold precludes more precise assignment, but could be paralogue of TNFRSF14.                                                                                                                                                                                                                                                                 |
|                        |                           | SINCAMP000000015481     | scaffold_4123: 930-3,873; annotated as NGFR (TNFRSF16); located on single gene scaffold. An additional TNFRSF16 gene was identified on scaffold_88, indicating that there may be at least two copies of this gene in the <i>C. milii</i> genome                                                                                                                                                                                |

| <i>H. sapiens</i> gene     | <i>H. sapiens</i> protein | <i>C. milii</i> protein | Remarks                                                                                                                                                      |
|----------------------------|---------------------------|-------------------------|--------------------------------------------------------------------------------------------------------------------------------------------------------------|
|                            |                           | SINCAMP00000022562      | scaffold_4448: 115-4,153; annotated as TNFRSF14. Its location on single gene scaffold precludes more precise assignment, but could be paralogue of TNFRSF14. |
|                            |                           | SINCAMP00000010661      | scaffold_5741: 89-3,527; annotated as TNFRSF14. Its location on single gene scaffold precludes more precise assignment, but could be paralogue of TNFRSF14.  |
|                            |                           |                         |                                                                                                                                                              |
| <b>Ligands (selection)</b> |                           |                         |                                                                                                                                                              |
|                            |                           |                         |                                                                                                                                                              |
| TNFSF1                     | ENSP00000407133           |                         | not identified in MHC region of <i>C. milii</i> ; absent from transcriptomes                                                                                 |
| TNFSF2                     | ENSP00000365290           |                         | Not detected in <i>C. milii</i> assembly and transcriptome; but candidate identified in nurse shark transcriptome (KC814628)                                 |
| TNFSF3                     | ENSP00000410481           |                         | not identified in MHC region of <i>C. milii</i> ; absent from transcriptomes                                                                                 |
| TNFSF5 (CD40LG)            | ENSP00000359663           | SINCAMP00000023076      | identified by synteny and phylogeny                                                                                                                          |
| TNFSF6 (FASLG)             | ENSP00000356694           | SINCAMP00000024563      | identified by synteny and phylogeny                                                                                                                          |
| TNFSF7 (CD70)              | ENSP00000245903           |                         | syntenic region not identified; no BLAST hit                                                                                                                 |
| TNFSF9                     | ENSP00000245817           | SINCAMP00000008977      | potential fragment located on scaffold_7902: 825-1,901; potential fragment of TNFSF9 or TNFSF10                                                              |
| TNFSF10 (TRAIL)            | ENSP00000241261           | SINCAMP00000021674      | identified by synteny (one linked gene) and phylogeny                                                                                                        |
| TNFSF11 (RANKL)            | ENSP00000239849           | SINCAMP00000002766      | identified by synteny and phylogeny                                                                                                                          |
| TNFSF14 (LIGHT)            | ENSP00000245912           |                         | syntenic region not identified; no BLAST hit                                                                                                                 |

**Supplementary Table XI.9 | Lymphoid lineage determinants and regulators**

| <i>H. sapiens</i> gene               | <i>H. sapiens</i> protein | <i>C. milii</i> protein | Remarks                                                                                 |
|--------------------------------------|---------------------------|-------------------------|-----------------------------------------------------------------------------------------|
| <b>Lymphocyte lineage regulators</b> |                           |                         |                                                                                         |
| ZBTB7A/LRF                           | ENSP00000323670           | SINCAMP00000010356      |                                                                                         |
| ZBTB7B/ThPOK                         | ENSP00000292176           | KC763333                | See Supplementary Fig. XI.6 and transcript in <i>G. cirratum</i> transcriptome KC763332 |
| ZBTB7C/KrPOK                         | ENSP00000328732           | SINCAMP00000000448      |                                                                                         |
| RUNX1                                | ENSP00000300305           | SINCAMP00000004083      |                                                                                         |
| RUNX2                                | ENSP00000319087           | SINCAMP00000006257      |                                                                                         |
| RUNX3                                | ENSP00000308051           | SINCAMP00000004283      |                                                                                         |
| SOX13                                | ENSP00000356172           | SINCAMP00000013945      |                                                                                         |
| FOXP3                                | ENSP00000365369           |                         | Related gene present; see Supplementary Fig. XI.5                                       |
| PAX5                                 | ENSP00000350844           | SINCAMP00000013433      |                                                                                         |
| PU.1/SPI1                            | ENSP00000367799           | SINCAMP00000019840      |                                                                                         |
| SPIB                                 | ENSP00000471921           | SINCAMP00000018290      |                                                                                         |
| TCF3                                 | ENSP00000262965           | SINCAMP00000014972      |                                                                                         |
| TCF12                                | ENSP00000267811           | SINCAMP00000010590      |                                                                                         |
| EBF1                                 | ENSP00000322898           | SINCAMP00000015692      |                                                                                         |
| AIOS/IKZF3                           | ENSP00000344544           | SINCAMP00000009354      |                                                                                         |
| IKAROS/IKZF1                         | ENSP00000331614           | SINCAMP00000007591      |                                                                                         |
| NOTCH1                               | ENSP00000277541           | SINCAMP00000003506      |                                                                                         |
| DLL4                                 | ENSP00000249749           | SINCAMP00000016519      |                                                                                         |
| PRDM1/BLIMP1                         | ENSP00000358092           | SINCAMP00000008650      |                                                                                         |
| BCL6                                 | ENSP00000384371           | SINCAMP00000019087      |                                                                                         |
| XBP1                                 | ENSP00000216037           | SINCAMP00000008423      |                                                                                         |
| IRF4                                 | ENSP00000370343           | SINCAMP00000002901      |                                                                                         |

| <i>H. sapiens</i> gene | <i>H. sapiens</i> protein | <i>C. mili</i> protein | Remarks                                                                               |
|------------------------|---------------------------|------------------------|---------------------------------------------------------------------------------------|
| IRF8                   | ENSP00000268638           | SINCAMP00000004830     |                                                                                       |
| FOXOA3                 | ENSP00000300134           | SINCAMP00000012650     |                                                                                       |
| FOXO1                  | ENSP00000368880           | SINCAMP00000006546     |                                                                                       |
| ZBTB17/MIZ1            | ENSP00000364895           | SINCAMP00000005658     |                                                                                       |
| ZBTB16/PLZF            | ENSP00000338157           | SINCAMP00000020857     |                                                                                       |
| PATZ1/MAZR             | ENSP00000266269           | KC707912               | AAVX01308284.1; not annotated on scaffold_10363; see also KC707912                    |
| RORC                   | ENSP00000327025           |                        | Not identified; syntenic region absent; absent from <i>G. cirratum</i> transcriptomes |
| RORA                   | ENSP00000261523           | SINCAMP00000011961     |                                                                                       |
| TOX                    | ENSP00000354842           | SINCAMP00000023003     |                                                                                       |
| BATF                   | ENSP00000286639           | SINCAMP00000015024     |                                                                                       |
| CMYB                   | ENSP00000356788           | SINCAMP00000024877     |                                                                                       |
| GATA3                  | ENSP00000368632           | SINCAMP00000014487     |                                                                                       |
| BCL11B                 | ENSP00000349723           | SINCAMP00000000128     |                                                                                       |
| EOMES                  | ENSP00000295743           | SINCAMP00000023351     |                                                                                       |
| ETS1                   | ENSP00000376436           | SINCAMP00000018427     |                                                                                       |
| TBX21/TBET             | ENSP00000177694           | SINCAMP00000017134     |                                                                                       |
| RBPJ                   | ENSP00000305815           | SINCAMP00000002525     |                                                                                       |
| CMAF                   | ENSP00000327048           | KC707913               | Only in transcriptomes, not in genomic assembly; see KC707913                         |
| MAFA                   | ENSP00000328364           | SINCAMP00000011056     |                                                                                       |
| MAFB                   | ENSP00000362410           | SINCAMP00000005813     |                                                                                       |
| MAFF                   | ENSP00000345393           | SINCAMP00000007860     | Candidate; supported by sequence only, no synteny information available               |
| MAFG                   | ENSP00000350369           | SINCAMP00000003223     |                                                                                       |
| MAFK                   | ENSP00000344903           | SINCAMP00000005482     |                                                                                       |
| SATB1                  | ENSP00000341024           | SINCAMP00000007530     |                                                                                       |

| <i>H. sapiens</i> gene | <i>H. sapiens</i> protein | <i>C. milii</i> protein        | Remarks                                                                                                                              |
|------------------------|---------------------------|--------------------------------|--------------------------------------------------------------------------------------------------------------------------------------|
| FOS                    | ENSP00000306245           | SINCAMP00000015032             | Scaffold_319: 287,401-285,004                                                                                                        |
| JUN (AP1)              | ENSP00000360266           | SINCAMP00000003449<br>KA353648 | Two genes annotated as JUN<br>(SINCAMP00000003449- Scaffold_112:<br>2,106,049-2,107,096; KA353648-<br>Scaffold_180: 993,391-993,032) |
| NFATC2                 | ENSP00000379330           | SINCAMP00000013500             | Scaffold_6: 3,359,487-3,323,329                                                                                                      |
| NFATC1 (NFAT2)         | ENSP00000316553           | SINCAMP00000011077             | Scaffold_80: 3,266,390-3,329,765                                                                                                     |
| NFATC4 (NFAT3)         | ENSP00000250373           |                                | Not found in <i>C. milii</i> , but found in <i>G. cirratum</i> RNAseq (KC814620)                                                     |
| NFATC3 (NFAT4)         | ENSP00000300659           | SINCAMP00000007125             | Scaffold_12: 10,047,001-10,088,986                                                                                                   |
| NFAT5                  | ENSP00000396538           | SINCAMP00000005998             | Scaffold_12: 3,686,605-3,712,316                                                                                                     |
| NFKB1                  | ENSP00000226574           | SINCAMP00000015490             | Scaffold_21: 649,500-718,426                                                                                                         |
| NFKB2                  | ENSP00000358983           | SINCAMP00000025350             | Scaffold_3: 14,563,467-14,584,725                                                                                                    |
| RELA (NFKB3)           | ENSP00000311508           | JW870713                       | no <i>C. milii</i> genomic scaffold                                                                                                  |
|                        |                           |                                |                                                                                                                                      |
| <b>Signalling</b>      |                           |                                |                                                                                                                                      |
| STAT1                  | ENSP00000354394           | SINCAMP00000001520             |                                                                                                                                      |
| STAT3                  | ENSP00000264657           | SINCAMP00000020398             |                                                                                                                                      |
| STAT4                  | ENSP00000351255           | SINCAMP00000001542             |                                                                                                                                      |
| STAT6                  | ENSP00000300134           | SINCAMP000000012650            |                                                                                                                                      |
| LCK                    | ENSP00000337825           | SINCAMP00000004899             |                                                                                                                                      |
| JAK1                   | ENSP00000343204           | SINCAMP000000016030            |                                                                                                                                      |
| JAK3                   | ENSP00000432511           | SINCAMP00000008456             |                                                                                                                                      |
| SYK                    | ENSP00000364898           | SINCAMP000000013604            | Scaffold_75: 3,316,637-3,362,460                                                                                                     |
| ZAP70                  | ENSP00000264972           | SINCAMP00000009420             | Scaffold_85: 203,759-179,395                                                                                                         |
| SLP76                  | ENSP00000046794           | SINCAMP000000015990            | Scaffold_19: 4,885,242-4,945,932                                                                                                     |
| FYN                    | ENSP00000346671           | SINCAMP000000024162            | Scaffold_84: 1,944,409-1,931,723                                                                                                     |
| LYN                    | ENSP00000428924           | SINCAMP00000001754             | scaffold_17: 9609151-9661378                                                                                                         |

| <i>H. sapiens</i> gene | <i>H. sapiens</i> protein | <i>C. milii</i> protein | Remarks                             |
|------------------------|---------------------------|-------------------------|-------------------------------------|
| GRB2                   | ENSP00000339007           | SINCAMP00000002020      | Scaffold_10: 2,135,018-2,155,074    |
| AKT1                   | ENSP00000270202           | SINCAMP00000010992      | Scaffold_9: 10,358,725-10,376,375   |
| MAP2K1                 | ENSP00000302486           | SINCAMP00000008737      | Scaffold_5: 591,857-578,620         |
| MAP2K2                 | ENSP00000262948           | SINCAMP00000010354      | Scaffold_85: 1,649,633-1,671,781    |
| MAPK1                  | ENSP00000215832           | SINCAMP00000020187      | Scaffold_221: 97-56,125             |
| MAPK8 (JNK1)           | ENSP00000353483           | SINCAMP00000006509      | Scaffold_126: 1,334,017-1,317,695   |
| MAPK9                  | ENSP00000345524           | SINCAMP00000008135      | Scaffold_87: 3,213,495-3,203,552    |
| MAP10                  | ENSP00000352157           | SINCAMP00000022605      | Scaffold_50: 742,187-786,297        |
| DAG1                   | ENSP00000312435           | SINCAMP00000006741      | Scaffold_15: 6,710,560-6,724,418    |
| PRKCB                  | ENSP00000305355           | SINCAMP00000005760      | scaffold_147: 1,003,841-1,022,084   |
| PRKCE                  | ENSP00000306124           | SINCAMP00000023222      | Scaffold_49: 2,429,044-2,511,423    |
| PRKCA                  | ENSP00000408695           | SINCAMP00000005295      | Scaffold_10: 9,147,406-9,121,308    |
| PRKCD                  | ENSP00000378217           | SINCAMP00000006692      | Scaffold_15: 6,563,594-6,546,572    |
| PRKCI                  | ENSP00000295797           | SINCAMP00000025114      | Scaffold_1: 8,317,543-8,294,238     |
| PRKCQ                  | ENSP00000263125           | SINCAMP00000014448      | Scaffold_191: 413,423-392,166       |
| PRKCZ                  | ENSP00000367830           | SINCAMP00000011330      | Scaffold_93: 1,615,209-1,724,106    |
| PLCG1                  | ENSP00000244007           | SINCAMP00000006093      | scaffold_137:1438981-1479687        |
| PLCG2                  | ENSP00000352336           | SINCAMP00000005324      | Scaffold_12: 2,361,357-2,304,355    |
| PPP3CA                 | ENSP00000378323           | SINCAMP00000015438      | Scaffold-21: 234,725-111,793        |
| KCNH8                  | ENSP00000328813           | SINCAMP00000007524      | Scaffold_56: 2,287,582-2,161,766    |
| mTOR                   | ENSP00000354558           | SINCAMP00000010413      | Scaffold_58: 1,411,767-1,582,650    |
| HAVCR2 (TIM3)          | ENSP00000312002           |                         | not detected                        |
| MS4A1 (CD20)           | ENSP00000314620           |                         | not detected                        |
| FKBP1A                 | ENSP00000383003           | SINCAMP00000021614      | Scaffold_51: 1,621,800-1,632,540    |
| FKBP11                 | ENSP00000449751           | SINCAMP00000007723      | Scaffold_672: 15,631-19,912         |
| FKBP2                  | ENSP00000310935           | JW877518                | no <i>C. milii</i> genomic scaffold |



| <i>H. sapiens</i> gene | <i>H. sapiens</i> protein | <i>C. mili</i> protein                                            | Remarks                                                                                                                                                                    |
|------------------------|---------------------------|-------------------------------------------------------------------|----------------------------------------------------------------------------------------------------------------------------------------------------------------------------|
| FKBP1B                 | ENSP00000370373           | SINCAMP00000021561                                                | Scaffold_51: 1,536,858-1,572,480                                                                                                                                           |
| FKBP7                  | ENSP00000413152           | SINCAMP00000001047                                                | Scaffold_14: 5,708,007-5,703,851                                                                                                                                           |
| FKBP6                  | ENSP00000252037           | SINCAMP000000018642                                               | Scaffold_47: 747,639-743,584                                                                                                                                               |
| FKBP8                  | ENSP00000388891           | SINCAMP000000008870                                               | Scaffold_64: 3,207,376-3,210,462                                                                                                                                           |
| FKBP15                 | ENSP00000416158           | SINCAMP000000008031                                               | Scaffold_77: 319,821-300,043                                                                                                                                               |
| FKBP3                  | ENSP00000216330           | SINCAMP000000004049                                               | Scaffold_114: 519,108-522,862                                                                                                                                              |
| FKBP9                  | ENSP00000242209           | SINCAMP000000010517                                               | Scaffold_83: 2,033,873-2,048,529                                                                                                                                           |
| FKBP14                 | ENSP00000222803           | SINCAMP000000005315                                               | Scaffold_178: 940,186-949,670                                                                                                                                              |
| PTPN6                  | ENSP00000391592           | JW866484                                                          | Scaffold_8122: 1,059-32                                                                                                                                                    |
| SHP2/PTPN11            | ENSP00000340944           | SINCAMP000000011807                                               | Scaffold_91: 2,622,571-2,645,717                                                                                                                                           |
| FASLGa                 | ENSP00000356694           | SINCAMP000000024564<br>SINCAMP000000024563<br>SINCAMP000000024571 | There are three genes in tandem in scaffold_41 (SINCAMP000000024564-3,537,743-3,535,459; SINCAMP000000024563-3,519,386-3,517,964; SINCAMP000000024571-3,544,543-3,542,925) |
| LRRC32                 | ENSP00000260061           | KA353666                                                          | Scaffold_3992: 2,638-4,596                                                                                                                                                 |
| PIAS1                  | ENSP00000438574           | SINCAMP000000015122                                               | Scaffold_282: 148,838-110,015                                                                                                                                              |
| PIAS2                  | ENSP00000381648           | SINCAMP000000009685                                               | Scaffold_591: 27,010-11,084                                                                                                                                                |
| PIAS3                  | ENSP00000376765           | KA353655                                                          | Scaffold_10165: 983-409                                                                                                                                                    |
| PIAS4                  | ENSP00000262971           |                                                                   | not detected                                                                                                                                                               |
| TYK2                   | ENSP00000264818           | SINCAMP000000003024                                               | Scaffold_180: 50,328-67,947                                                                                                                                                |
| HSCT (DAP10)           | ENSP00000246551           |                                                                   | not detected                                                                                                                                                               |
| TYROBP (DAP12)         | ENSP00000262629           |                                                                   | Not found from <i>C. mili</i> , but found in <i>G. cirratum</i> transcriptome (KC814624)                                                                                   |
| CD3zeta                | ENSP00000354782           | SINCAMP000000024473                                               | Scaffold_42: 3,590,223-3,580,480                                                                                                                                           |
| SH2D1A (SAP)           | ENSP00000360181           | SINCAMP000000024872                                               | Scaffold_2: 14,759,749-14,746,474                                                                                                                                          |
| SH2D1B (EAT2)          | ENSP00000356906           | SINCAMP000000024259                                               | Two genes in tandem in Scaffold_42 (2,845,258-2,841,947 & 2,864,486-                                                                                                       |

| <i>H. sapiens</i> gene             | <i>H. sapiens</i> protein | <i>C. mili</i> protein                   | Remarks                                                                                                      |
|------------------------------------|---------------------------|------------------------------------------|--------------------------------------------------------------------------------------------------------------|
|                                    |                           |                                          | 2,859,893)                                                                                                   |
| <b>Costimulation/<br/>adhesion</b> |                           |                                          |                                                                                                              |
| CTLA4                              | ENSP00000303939           | SINCAMP00000005234                       | Scaffold_16:388,005-395,357                                                                                  |
|                                    |                           | SINCAMP00000005238                       | Scaffold_16:421,101-428,838; duplicated gene?                                                                |
| CD28                               | ENSP00000393648           | SINCAMP00000024276                       |                                                                                                              |
| CD276                              | ENSP00000454940           | SINCAMP00000014095<br>SINCAMP00000011201 | Assignment of SINCAMP00000014095 is supported by sequence and synteny; SINCAMP00000011201 is CD276-like gene |
| ITGAL (LFA-1)                      | ENSP00000349252           | SINCAMP00000000567                       | Scaffold_1523: 269-11,354                                                                                    |
| ICAM-1                             | ENSP00000264832           |                                          | not detected                                                                                                 |
| VCAM1/ICAM2                        | ENSP00000388666           | SINCAMP00000003744                       | There may be three genes in tandem in Scaffold_180: 552,659-548,609; 560,649-565,744; 548,914-548,609        |
| SELP                               | ENSP00000356764           | SINCAMP00000022922                       | Scaffold_41:1,200,630-1,214,578; There seems to be 3 genes in tandem in this region (SELP, SELL, SELE?)      |
| CD44                               |                           | KA353646                                 |                                                                                                              |
| ITGAE                              | ENSP00000263087           | SINCAMP00000019447                       | Scaffold_47: 1,626,683-1,601,694                                                                             |
| CD83                               | ENSP00000368450           |                                          | not detected                                                                                                 |
| SELL                               | ENSP00000236147           | SINCAMP00000022922                       | see SELP                                                                                                     |
| SELE                               | ENSP00000331736           |                                          | not detected in <i>C. mili</i> , but present in <i>G. cirratum</i> RNA seq (KC814630)                        |
| SELPLG                             | ENSP00000228463           | KA353638; KA353638                       | Scaffold_91: 2,601,623-2,602,414                                                                             |
| Sirp beta                          | ENSP00000279477           | KA353665                                 | Scaffold_328: 180,483-185,178                                                                                |
| <b>Coreceptors</b>                 |                           |                                          |                                                                                                              |
| CD4                                | ENSP00000011653           |                                          | Related gene present; see Supplementary Figs. XI.8;9;10.                                                     |

| <i>H. sapiens</i> gene           | <i>H. sapiens</i> protein | <i>C. milii</i> protein | Remarks                            |
|----------------------------------|---------------------------|-------------------------|------------------------------------|
| CD8A                             | ENSP00000283635           | SINCAMP00000009412      | see Supplementary Fig. XI.7;8.     |
| CD8B                             | ENSP00000331172           | SINCAMP00000009419      | see Supplementary Fig. XI.7;8.     |
| <b>Other lymphocyte genes</b>    |                           |                         |                                    |
| RAG1                             | ENSP00000299440           | SINCAMP00000025908      |                                    |
| RAG2                             | ENSP00000308620           | SINCAMP00000025909      |                                    |
| DNTT                             | ENSP00000360216           | SINCAMP00000019696      |                                    |
| AICDA                            | ENSP00000229335           | KC707911                | partial sequence in AAVX01329030.1 |
| ADA                              | ENSP00000361965           | SINCAMP00000013030      |                                    |
| DCLRE1C/ ARTEMIS                 | ENSP00000350349           | SINCAMP00000020621      |                                    |
| LIG4                             | ENSP00000349393           | SINCAMP00000025957      |                                    |
| NHEJ1                            | ENSP00000349313           | SINCAMP00000019288      |                                    |
| ORAI1                            | ENSP00000328216           | SINCAMP00000026452      |                                    |
| PNP                              | ENSP00000354532           | SINCAMP00000012687      |                                    |
| PRF1                             | ENSP00000316746           | SINCAMP00000026251      |                                    |
| STIM1                            | ENSP00000300737           | SINCAMP00000022129      |                                    |
| STX11                            | ENSP00000356540           | SINCAMP00000022396      |                                    |
| UNC13D                           | ENSP00000207549           | SINCAMP00000005853      |                                    |
| CIITA                            | ENSP00000316328           | SINCAMP00000005130      |                                    |
| IgJ (J chain)                    | ENSP00000440066           | SINCAMP00000017282      | Scaffold_208: 110,393-116,382      |
| <b>Lymphoid organ regulators</b> |                           |                         |                                    |
| TLX1/HOX11                       | ENSP00000359215           | SINCAMP00000006174      |                                    |
| FOXN1                            | ENSP00000226247           | SINCAMP00000020745      |                                    |
| AIRE                             | ENSP00000291582           | SINCAMP00000025355      |                                    |

Supplementary Table XI.10 | Genes involved in the apoptosis pathway

| <i>H. sapiens</i> gene | <i>H. sapiens</i> protein | <i>C. milii</i> protein               | Remarks                                                                                                                                                                             |
|------------------------|---------------------------|---------------------------------------|-------------------------------------------------------------------------------------------------------------------------------------------------------------------------------------|
| BCL2                   | ENSP00000381185           | SINCAMP00000012079                    | Scaffold_79: 2,457,321-2,389,102                                                                                                                                                    |
| BCLX                   | ENSP00000365230           | SINCAMP00000004879                    | Scaffold_137: 40,678-42,413                                                                                                                                                         |
| BCL2L2                 | ENSP00000250405           |                                       |                                                                                                                                                                                     |
| MCL1                   | ENSP00000358022           | SINCAMP00000014943<br>JW867639        | Two candidates were detected: (1) SINCAMP00000014943 in scaffold_2238: 4,046-5,878 (2) a gene distributed across two scaffolds (scaffold-2286: 636-388; scaffold_2177: 2,464-2,577) |
| APAF1                  | ENSP00000448165           | SINCAMP00000017275                    | Scaffold_194: 891,703-743,621                                                                                                                                                       |
| BID                    | ENSP00000318822           | SINCAMP00000002239                    | Scaffold_133: 1,997,934-1,994,695                                                                                                                                                   |
| BAK1                   | ENSP00000363591           | SINCAMP00000016573                    | Scaffold_33: 1,350,963-1,363,138                                                                                                                                                    |
| BAX                    | ENSP00000293288           | SINCAMP00000014512 SINCAMP00000014463 | two genes ~46% similar to each other are found in tandem in Scaffold_349 (SINCAMP00000014512:189,755-191,483; SINCAMP00000014463: 175,142-173,881)                                  |
| BLK                    | ENSP00000259089           |                                       | not found in the <i>C. milii</i> genomic scaffold, but found in <i>G. cirratum</i> transcriptome (KC814634)                                                                         |
| HRK                    | ENSP00000257572           |                                       | not detected                                                                                                                                                                        |
| BCL2L11                | ENSP00000376943           | SINCAMP00000023919                    | Scaffold_31: 4,997,189-4,977,379                                                                                                                                                    |
| BAD                    | ENSP00000309103           | KA353645                              | not found in the genomic scaffold                                                                                                                                                   |
| NOXA                   | ENSP00000269518           |                                       | not detected                                                                                                                                                                        |
| BBC3                   | ENSP00000404503           |                                       | not found in the <i>C. milii</i> databases, but found in the <i>S. canicula</i> (Scanicula_Contig2889; ORF:47..574 Frame -2)                                                        |
| BMF                    | ENSP00000346697           | SINCAMP00000023259                    | Scaffold_28: 491,310-513,131                                                                                                                                                        |
| FADD                   | ENSP00000301838           | SINCAMP00000012311                    | Scaffold_8: 10,116,178-10,117,903                                                                                                                                                   |

|        |                 |                     |                                                                                                                                                                      |
|--------|-----------------|---------------------|----------------------------------------------------------------------------------------------------------------------------------------------------------------------|
| CFLAR  | ENSP00000312455 |                     | not found in <i>C. milii</i> databases, but found in <i>L. erinacea</i> and <i>S. canicula</i> (Lerinacea_Contig16392; Scanicula_Contig94283 ORF:137..1300 Frame +2) |
| DIABLO | ENSP00000398495 | SINCAMP00000007630  | Scaffold_94: 581,047-582,770                                                                                                                                         |
| XIAP   | ENSP00000360242 | SINCAMP000000024937 | Scaffold_2: 14,881,599-14,876,090                                                                                                                                    |
| TP53   | ENSP00000269305 | AEW46988.1          | not found in the genomic scaffold                                                                                                                                    |

**Supplementary Table XI.11 | Vertebrate CD8 sequences used for phylogenetic analyses**

| CD8A sequences                    |              |           |                     |             |
|-----------------------------------|--------------|-----------|---------------------|-------------|
| Species                           | Abbreviation | Gene name | Protein Sequence ID | Length (aa) |
| <i>Ailuropoda melanoleuca</i>     | Am           | CD8A      | ENSAMEP00000010525  | 268         |
| <i>Bos taurus</i>                 | Bt           | CD8A      | ENSBTAP00000028175  | 242         |
| <i>Callithrix jacchus</i>         | Cj           | CD8A      | Q3LRP5_CALJA        | 235         |
| <i>Canis lupus familiaris</i>     | Clf          | CD8A      | ENSCAFP00000011083  | 239         |
| <i>Cavia porcellus</i>            | Cp           | CD8A      | ENSCPOP00000019634  | 237         |
| <i>Dasypus novemcinctus</i>       | Dn           | CD8A      | ENSDNOP00000001766  | 238         |
| <i>Echinops telfairi</i>          | Et           | CD8A      | ENSETEP00000012809  | 236         |
| <i>Equus caballus</i>             | Eca          | CD8A      | ENSECAP00000011123  | 244         |
| <i>Erinaceus europaeus</i>        | Ee           | CD8A      | ENSEEUP00000013542  | 203         |
| <i>Felis catus</i>                | Fc           | CD8A      | ENSFCAP00000013754  | 239         |
| <i>Gorilla gorilla</i>            | Ggo          | CD8A      | ENSGGOP00000003948  | 219         |
| <i>Homo sapiens</i>               | Hs           | CD8A      | ENSP00000283635     | 235         |
| <i>Ictidomys tridecemlineatus</i> | It           | CD8A      | ENSSTOP00000010260  | 238         |
| <i>Loxodonta africana</i>         | La           | CD8A      | ENSLAFP00000003269  | 235         |
| <i>Macaca mulatta</i>             | Mmu          | CD8A      | ENSMMUP00000004695  | 235         |
| <i>Macropus eugenii</i>           | Me           | CD8A      | ABX79404.1          | 241         |
| <i>Monodelphis domesticata</i>    | Md           | CD8A      | ENSMODP00000011883  | 235         |
| <i>Mus musculus</i>               | Mm           | CD8A      | ENSMUSP00000068123  | 247         |
| <i>Mustela putorius furo</i>      | Mpf          | CD8A      | ENSMPUP00000009228  | 242         |
| <i>Nomascus leucogenys</i>        | Nl           | CD8A      | ENSNLEP00000003542  | 275         |
| <i>Oryctolagus cuniculus</i>      | Oc           | CD8A      | ENSOCUP00000008088  | 234         |
| <i>Otolemur garnettii</i>         | Og           | CD8A      | ENSOGAP00000006471  | 276         |
| <i>Pan troglodytes</i>            | Pt           | CD8A      | ENSPTRP00000020853  | 276         |
| <i>Pongo abelii</i>               | Pa           | CD8A      | ENSPPYP00000013612  | 272         |
| <i>Procapra capensis</i>          | Pc           | CD8A      | ENSPCAP00000013977  | 235         |
| <i>Pteropus vampyrus</i>          | Pv           | CD8A      | ENSPVAP00000008380  | 236         |
| <i>Rattus norvegicus</i>          | Rn           | CD8A      | ENSRNOP00000009516  | 236         |
| <i>Sus scrofa</i>                 | Sus          | CD8A      | ENSSSCP00000008772  | 236         |
| <i>Anas platyrhynchos</i>         | Ap           | CD8A      | ACL52151.1          | 237         |
| <i>Anas poecilorhyncha</i>        | Apo          | CD8A      | AFP48734.1          | 237         |
| <i>Anser anser</i>                | Aa           | CD8A      | AFG26509.1          | 236         |
| <i>Cairina moschata</i>           | Cmo          | CD8A      | AAW63064.1          | 237         |
| <i>Gallus gallus</i>              | Gg           | CD8A      | ENSGALP00000025510  | 235         |
| <i>Meleagris gallopavo</i>        | Mg           | CD8A      | ENSMGAP00000013908  | 238         |
| <i>Pelodiscus sinensis</i>        | Ps           | CD8A      | ENSPSIP00000017952  | 266         |
| <i>Taeniopygia guttata</i>        | Tg           | CD8A      | ENSTGUP00000011178  | 216         |
| <i>Xenopus laevis</i>             | Xl           | CD8A      | ENSXETP00000004085  | 219         |
| <i>Xenopus tropicalis</i>         | Xt           | CD8A      | XP_002937320.1      | 234         |
| <i>Callorhynchus milii</i>        | Cm           | CD8A      | SINCAMP00000009412  | 211         |
| <i>Ctenopharyngodon idella</i>    | Ci           | CD8A      | ACU30711.1          | 215         |
| <i>Danio rerio</i>                | Dr           | CD8A      | ENSDARP000000065841 | 216         |
| <i>Dicentrarchus labrax</i>       | Dl           | CD8A      | AAZ66439.1          | 222         |
| <i>Epinephelus coioides</i>       | Ec           | CD8A      | ACS68183.1          | 227         |
| <i>Ginglymostoma cirratum</i>     | Gc           | CD8A      | KC707917            | 220         |
| <i>Gasterosteus aculeatus</i>     | Ga           | CD8A      | ENSGACP00000011825  | 224         |

|                            |                     |                  |                            |                    |
|----------------------------|---------------------|------------------|----------------------------|--------------------|
| Hippoglossus hippoglossus  | Hh                  | CD8A             | ACF04751.1                 | 216                |
| Ictalurus punctatus        | Ip                  | CD8A             | NP_001187260.1             | 223                |
| Oncorhynchus mykiss        | Om                  | CD8A             | NP_001117735.1             | 226                |
| Oreochromis niloticus      | On                  | CD8A             | ENSONIP00000025678         | 222                |
| Oryzias latipes            | Ol                  | CD8A             | ENSORLP00000010686         | 228                |
| Paralichthys olivaceus     | Po                  | CD8A             | BAC66490.1                 | 225                |
| Rhinobatos productus       | Rp                  | CD8A             | ABQ85060.1                 | 219                |
| Salmo salar                | Ss                  | CD8A             | NP_001117055.1             | 226                |
| Siniperca chuatsi          | Sc                  | CD8A             | ADK56159.1                 | 221                |
| Takifugu rubripes          | Tr                  | CD8A             | ENSTRUP00000038110         | 219                |
| Tetraodon nigroviridis     | Tn                  | CD8A             | ENSTNIP00000000873         | 231                |
| Xiphophorus maculatus      | Xm                  | CD8A             | ENSXMAP00000002139         | 224                |
|                            |                     |                  |                            |                    |
| <i>Outgroup:</i>           |                     |                  |                            |                    |
| Homo sapiens               | Hs                  | CD7              | ENSP00000312027            | 240                |
|                            |                     |                  |                            |                    |
| <b>CD8B sequences</b>      |                     |                  |                            |                    |
| <b>Species</b>             | <b>Abbreviation</b> | <b>Gene name</b> | <b>Protein Sequence ID</b> | <b>Length (aa)</b> |
| Ailuropoda melanoleuca     | Am                  | CD8B             | ENSAMEP00000010534         | 205                |
| Bos taurus                 | Bt                  | CD8B             | ENSBTAP00000032971         | 210                |
| Callithrix jacchus         | Cj                  | CD8B             | ENSCJAP00000035959         | 245                |
| Canis lupus familiaris     | Clf                 | CD8B             | ENSCAFP00000011081         | 210                |
| Cavia porcellus            | Cp                  | CD8B             | ENSCPOP00000004922         | 210                |
| Dipodomys ordii            | Do                  | CD8B             | ENSDORP00000003622         | 231                |
| Equus caballus             | Eca                 | CD8B             | ENSECAP00000000773         | 210                |
| Gorilla gorilla            | Ggo                 | CD8B             | ENSGGOP00000007291         | 209                |
| Homo sapiens               | Hs                  | CD8B             | ENSP00000331172            | 243                |
| Ictidomys tridecemlineatus | It                  | CD8B             | ENSSTOP00000003724         | 210                |
| Macaca mulatta             | Mmu                 | CD8B             | ENSMMUP00000004703         | 245                |
| Macropus eugenii           | Me                  | CD8B             | ABX79406.1                 | 207                |
| Microcebus murinus         | Mmur                | CD8B             | ENSMICP00000010382         | 246                |
| Monodelphis domesticata    | Md                  | CD8B             | ENSMODP00000011916         | 206                |
| Mus musculus               | Mm                  | CD8B             | ENSMUSP00000070131         | 213                |
| Mustela putorius furo      | Mpf                 | CD8B             | ENSMPUP00000009237         | 209                |
| Myotis lucifugus           | Ml                  | CD8B             | ENSMLUP00000003241         | 200                |
| Nomascus leucogenys        | Nl                  | CD8B             | ENSNLEP00000000411         | 196                |
| Oryctolagus cuniculus      | Oc                  | CD8B             | ENSOCUP00000008094         | 206                |
| Otolemur garnettii         | Og                  | CD8B             | ENSOGAP00000006477         | 210                |
| Pan troglodytes            | Pt                  | CD8B             | ENSPTRP00000059042         | 243                |
| Pongo abelii               | Pa                  | CD8B             | ENSPYP00000013609          | 243                |
| Procavia capensis          | Pc                  | CD8B             | ENSPCAP00000010341         | 241                |
| Rattus noveticus           | Rn                  | CD8B             | ENSRNOP00000009392         | 208                |
| Sarcophilus harrisii       | Sh                  | CD8B             | ENSSHAP00000013243         | 214                |
| Sus scrofa                 | Sus                 | CD8B             | ENSSSCP00000008768         | 209                |
| Tursiops truncatus         | Tt                  | CD8B             | ENSTTRP00000013776         | 206                |
| Ambystoma mexicanum        | Ame                 | CD8B             | AAF61253.1                 | 226                |
| Ficedula albicollis        | Fa                  | CD8B             | ENSTGUP00000011182_1       | 206                |
| Gallus gallus              | Gg                  | CD8B             | ENSGALP00000031383         | 207                |
| Meleagris gallopavo        | Mg                  | CD8B             | XP_003206080.1             | 207                |
| Melopsittacus undulatus    | Mu                  | CD8B             | TGUHOMP00000011182_1       | 207                |

|                                  |    |      |                    |     |
|----------------------------------|----|------|--------------------|-----|
| <i>Pelodiscus sinensis</i>       | Ps | CD8B | ENSPSIP00000017761 | 214 |
| <i>Taeniopygia guttata</i>       | Tg | CD8B | ENSTGUP00000011182 | 205 |
| <i>Xenopus laevis</i>            | Xl | CD8B | ADV71261.1         | 220 |
| <i>Callorhynchus milii</i>       | Cm | CD8B | SINCAMP00000009419 | 209 |
| <i>Ctenopharyngodon idella</i>   | Ci | CD8B | ACU30712.1         | 210 |
| <i>Danio rerio</i>               | Dr | CD8B | ENSDARP00000076041 | 208 |
| <i>Dicentrarchus labrax</i>      | Dl | CD8B | CBN81109.1         | 197 |
| <i>Epinephelus coioides</i>      | Ec | CD8B | ACS68186.1         | 212 |
| <i>Ginglymostoma cirratum</i>    | Gc | CD8B | KC814635           | 214 |
| <i>Gasterosteus aculeatus</i>    | Ga | CD8B | ENSGACP00000011833 | 205 |
| <i>Hippoglossus hippoglossus</i> | Hh | CD8B | ACF04750.1         | 212 |
| <i>Ictalurus punctatus</i>       | Ip | CD8B | NP_001187190.1     | 210 |
| <i>Oncorhynchus mykiss</i>       | Om | CD8B | NP_001117480.1     | 213 |
| <i>Oreochromis niloticus</i>     | On | CD8B | ENSONIP00000025675 | 213 |
| <i>Oryzias latipes</i>           | Ol | CD8B | ENSORLP00000010674 | 212 |
| <i>Paralichthys olivaceus</i>    | Po | CD8B | BAM65617.1         | 212 |
| <i>Salmo salar</i>               | Ss | CD8B | NP_001117056.1     | 214 |
| <i>Siniperca chuatsi</i>         | Sc | CD8B | ADV78595.1         | 212 |
| <i>Takifugu rubripes</i>         | Tr | CD8B | ENSTRUP00000038072 | 210 |
| <i>Tetraodon nigroviridis</i>    | Tn | CD8B | ENSTNIP00000000172 | 219 |
| <i>Xiphophorus maculatus</i>     | Xm | CD8B | ENSXMAP00000002132 | 217 |



### Supplementary Table XI.12 | Vertebrate CD4 and related sequences used for phylogenetic analyses

| CD4 sequences                     |              |                    |                     |             |
|-----------------------------------|--------------|--------------------|---------------------|-------------|
| Species                           | Abbreviation | Gene name          | Protein Sequence ID | Length (aa) |
| <i>Ailuropoda melanoleuca</i>     | Am           | CD4                | ENSAMEP00000014814  | 412         |
| <i>Bos taurus</i>                 | Bt           | CD4                | ENSBTAP00000037566  | 455         |
| <i>Canis lupus familiaris</i>     | Clf          | CD4                | NP_001003252.1      | 463         |
| <i>Cavia porcellus</i>            | Cp           | CD4                | ENSCPOP00000011087  | 460         |
| <i>Equus caballus</i>             | Eca          | CD4                | ENSECAP00000007248  | 461         |
| <i>Felis catus</i>                | Fc           | CD4                | NP_001009250.1      | 474         |
| <i>Gorilla gorilla</i>            | Ggo          | CD4                | ENSGGOP00000003173  | 458         |
| <i>Homo sapiens</i>               | Hs           | CD4                | ENSP00000011653     | 458         |
| <i>Ictidomys tridecemlineatus</i> | It           | CD4                | ENSSTOP00000015536  | 456         |
| <i>Loxodonta africana</i>         | La           | CD4                | ENSLAFP00000023728  | 450         |
| <i>Macropus eugenii</i>           | Me           | CD4                | ABR22561.1          | 464         |
| <i>Myotis lucifugus</i>           | Ml           | CD4                | ENSMLUP00000020857  | 447         |
| <i>Mus musculus</i>               | Mm           | CD4                | ENSMUSP00000024044  | 457         |
| <i>Macaca mulatta</i>             | Mmu          | CD4                | ENSMMUP00000017342  | 458         |
| <i>Mustela putorius furo</i>      | Mpf          | CD4                | ENSMPUP00000016704  | 462         |
| <i>Nomascus leucogenys</i>        | Nl           | CD4                | ENSNLEP00000005682  | 458         |
| <i>Ornithorhynchus anatinus</i>   | Oa           | CD4                | ENSOANP00000010475  | 499         |
| <i>Oryctolagus cuniculus</i>      | Oc           | CD4                | ENSOCUP00000016703  | 463         |
| <i>Pongo abelii</i>               | Pa           | CD4                | ENSPYP00000004788   | 414         |
| <i>Pan troglodytes</i>            | Pt           | CD4                | ENSPTRP00000054833  | 458         |
| <i>Rattus norvegicus</i>          | Rn           | CD4                | ENSRNOP00000021915  | 457         |
| <i>Sarcophilus harrisi</i>        | Sh           | CD4                | ENSSHAP00000018659  | 485         |
| <i>Sus scrofa</i>                 | Sus          | CD4                | ENSSSCP00000031048  | 457         |
| <i>Tursiops truncatus</i>         | Tt           | CD4                | ENSTTRP00000004366  | 454         |
| <i>Anser anser</i>                | Aa           | CD4                | AFG26508.1          | 480         |
| <i>Anas platyrhynchos</i>         | Ap           | CD4                | ENSAPLP00000002157  | 482         |
| <i>Cairina moschata</i>           | Cmo          | CD4                | AAW63065.1          | 482         |
| <i>Gallus gallus</i>              | Gg           | CD4                | ENSGALP00000036316  | 487         |
| <i>Meleagris gallopavo</i>        | Mg           | CD4                | ENSMGAP00000014929  | 488         |
| <i>Pelodiscus sinensis</i>        | Ps           | CD4                | ENSPSIP00000016561  | 458         |
| <i>Xenopus laevis</i>             | Xl           | CD4                | NP_001233240.1      | 473         |
| <i>Danio rerio</i>                | Dr           | CD4-2              | ENSDARP00000112097  | 383         |
| <i>Hippoglossus hippoglossus</i>  | Hh           | CD4-2              | ADP55206.1          | 308         |
| <i>Ictalurus punctatus</i>        | Ip           | CD4-like protein 2 | NP_001187156.1      | 412         |
| <i>Oryzias latipes</i>            | Ol           | CD4-like           | ENSORLP00000015990  | 302         |
| <i>Oncorhynchus mykiss</i>        | Om           | CD4-related (1)    | AAY42071.1          | 334         |
| <i>Oncorhynchus mykiss</i>        | Om           | CD4-related (2)    | NP_001118012.1      | 323         |
| <i>Oreochromis niloticus</i>      | On           | CD4-2              | ENSONIP00000016374  | 307         |
| <i>Paralichthys olivaceus</i>     | Po           | CD4-2              | BAM65616.1          | 302         |
| <i>Salmo salar</i>                | Ss           | T-cell             | NP_001139880.1      | 314         |

|                                   |              | surface glycoprotein CD4 (CD4-T) |                     |             |
|-----------------------------------|--------------|----------------------------------|---------------------|-------------|
| <i>Tetraodon nigroviridis</i>     | Tn           | CD4-2                            | ABU95652.1          | 309         |
| <i>Tetraodon nigroviridis</i>     | Tn           | CD4-like                         | CAF97820.1          | 312         |
| <i>Takifugu rubripes</i>          | Tr           | CD4-like                         | XP_003966373.1      | 258         |
| <i>Xiphophorus maculatus</i>      | Xm           | CD4                              | ENSXMAP00000011077  | 315         |
| <i>Ctenopharyngodon idella</i>    | Ci           | CD4-like                         | ACU30713.1          | 469         |
| <i>Dicentrarchus labrax</i>       | Dl           | CD4                              | CAO98731.1          | 480         |
| <i>Danio rerio</i>                | Dr           | CD4                              | ENSDARP00000121210  | 474         |
| <i>Epinephelus coioides</i>       | Ec           | CD4                              | ADM47441.1          | 469         |
| <i>Gasterosteus aculeatus</i>     | Ga           | CD4                              | ENSGACT00000013008  | 467         |
| <i>Hippoglossus hippoglossus</i>  | Hh           | CD4                              | ACM50925.1          | 462         |
| <i>Ictalurus punctatus</i>        | Ip           | CD4-like protein 1               | NP_001187155.1      | 471         |
| <i>Lateolabrax japonicus</i>      | Lj           | CD4                              | AFK73394.1          | 470         |
| <i>Oryzias latipes</i>            | Ol           | CD4                              | ENSORLP00000015999  | 469         |
| <i>Oncorhynchus mykiss</i>        | Om           | CD4                              | NP_001118011.1      | 489         |
| <i>Oreochromis niloticus</i>      | On           | CD4-1                            | ENSONIP00000016380  | 538         |
| <i>Paralichthys olivaceus</i>     | Po           | CD4-1                            | BAM65615.1          | 464         |
| <i>Siniperca chuatsi</i>          | Sc           | CD4                              | ADV78594.1          | 549         |
| <i>Salmo salar</i>                | Ss           | CD4-like                         | NP_001117083.1      | 490         |
| <i>Tetraodon nigroviridis</i>     | Tn           | CD4-4a                           | ABU95653.1          | 466         |
| <i>Tetraodon nigroviridis</i>     | Tn           | CD4-4b                           | ABU95654.1          | 454         |
| <i>Takifugu rubripes</i>          | Tr           | CD4                              | ENSTRUP00000027426  | 464         |
| <b>LAG3 sequences</b>             |              |                                  |                     |             |
| Species                           | Abbreviation | Gene name                        | Protein Sequence ID | Length (aa) |
| <i>Ailuropoda melanoleuca</i>     | Am           | LAG3                             | ENSAMEP00000014826  | 523         |
| <i>Bos taurus</i>                 | Bt           | LAG3                             | ENSBTAP00000045595  | 516         |
| <i>Callithrix jacchus</i>         | Cj           | LAG3                             | ENSCJAP00000014207  | 531         |
| <i>Canis lupus familiaris</i>     | Clf          | LAG3                             | ENSCAFP00000021640  | 476         |
| <i>Cavia porcellus</i>            | Cp           | LAG3                             | ENSCPOP00000011084  | 528         |
| <i>Dipodomys ordii</i>            | Do           | LAG3                             | ENSDORP00000001447  | 500         |
| <i>Equus caballus</i>             | Eca          | LAG3                             | ENSECAP00000002333  | 521         |
| <i>Gorilla gorilla</i>            | Ggo          | LAG3                             | ENSGGOP00000023756  | 533         |
| <i>Homo sapiens</i>               | Hs           | LAG3                             | ENSP00000203629     | 525         |
| <i>Ictidomys tridecemlineatus</i> | It           | LAG3                             | ENSSTOP00000013947  | 514         |
| <i>Loxodonta africana</i>         | La           | LAG3                             | ENSLAFP00000020155  | 518         |
| <i>Monodelphis domestica</i>      | Md           | LAG3                             | ENSMODP00000022611  | 484         |
| <i>Macropus eugenii</i>           | Me           | LAG3                             | ENSMEUP00000006085  | 518         |
| <i>Myotis lucifugus</i>           | Ml           | LAG3                             | ENSMLUP00000012548  | 514         |
| <i>Mus musculus</i>               | Mm           | LAG3                             | ENSMUSP00000032217  | 521         |
| <i>Macaca mulatta</i>             | Mmu          | LAG3                             | ENSMMUP00000017334  | 533         |
| <i>Mustela putorius furo</i>      | Mpf          | LAG3                             | ENSMPUP00000016720  | 521         |
| <i>Nomascus leucogenys</i>        | Nl           | LAG3                             | ENSNLEP00000005651  | 496         |

|                            |                     |                  |                            |                    |
|----------------------------|---------------------|------------------|----------------------------|--------------------|
| Oryctolagus cuniculus      | Oc                  | LAG3             | ENSOCUP00000009632         | 526                |
| Otolemur garnettii         | Og                  | LAG3             | ENSOGAP00000016914         | 520                |
| Ochontona princeps         | Op                  | LAG3             | ENSOPRP00000003416         | 467                |
| Pongo abelii               | Pa                  | LAG3             | ENSPPYP00000004787         | 525                |
| Pan troglodytes            | Pt                  | LAG3             | ENSPTRP00000042500         | 527                |
| Pteropus vampyrus          | Pv                  | LAG3             | ENSPVAP00000012921         | 433                |
| Rattus noveticus           | Rn                  | LAG3             | ENSRNOP00000036771         | 525                |
| Sarcophilus harrisi        | Sh                  | LAG3             | ENSSHAP00000018480         | 488                |
| Sus scrofa                 | Sus                 | LAG3             | ENSSSCP00000000734         | 507                |
| Gallus gallus              | Gg                  | LAG3             | XP_416510.2                | 504                |
| Oncorhynchus mykiss        | Om                  | LAG3             | NP_001182204.1             | 481                |
| Oreochromis niloticus      | On                  | LAG3             | ENSONIP00000016263         | 476                |
| Takifugu rubripes          | Tr                  | LAG3             | XP_003966355.1             | 460                |
| Xiphophorus maculatus      | Xm                  | LAG3             | ENSXMAP00000011431         | 459                |
|                            |                     |                  |                            |                    |
| <b>CD2 sequences</b>       |                     |                  |                            |                    |
| <b>Species</b>             | <b>Abbreviation</b> | <b>Gene name</b> | <b>Protein Sequence ID</b> | <b>Length (aa)</b> |
| Ailuropoda melanoleuca     | Am                  | CD2              | ENSAMEP00000005474         | 345                |
| Bos taurus                 | Bt                  | CD2              | ENSBTAP00000022936         | 338                |
| Callithrix jacchus         | Cj                  | CD2              | ENSCJAP00000011022         | 352                |
| Canis lupus familiaris     | Clf                 | CD2              | ENSCAFP00000014445         | 339                |
| Cavia porcellus            | Cp                  | CD2              | ENSCPOP00000000585         | 348                |
| Echinops telfairi          | Et                  | CD2              | ENSETEP00000000399         | 346                |
| Equus caballus             | Eca                 | CD2              | ENSECAP00000017053         | 347                |
| Felis catus                | Fc                  | CD2              | ENSFCAP00000001827         | 336                |
| Gorilla gorilla            | Ggo                 | CD2              | ENSGGOP00000005147         | 351                |
| Homo sapiens               | Hs                  | CD2              | ENSP000000358490           | 351                |
| Ictidomys tridecemlineatus | It                  | CD2              | ENSSTOP00000003746         | 343                |
| Loxodonta africana         | La                  | CD2              | ENSLAFP00000012048         | 343                |
| Macaca mulatta             | Mmu                 | CD2              | ENSMMPUP00000016101        | 351                |
| Microcebus murinus         | Mmur                | CD2              | ENSMICP00000010840         | 351                |
| Monodelphis domestica      | Md                  | CD2              | ENSMODP00000028992         | 350                |
| Mus musculus               | Mm                  | CD2              | ENSMUSP00000029456         | 344                |
| Mustela putorius furo      | Mpf                 | CD2              | ENSMMPUP00000001610        | 343                |
| Myotis lucifugus           | Ml                  | CD2              | ENSMLUP00000002902         | 350                |
| Nomascus leucogenys        | Nl                  | CD2              | ENSNLEP00000006260         | 351                |
| Oryctolagus cuniculus      | Oc                  | CD2              | ENSOCUP00000007321         | 350                |
| Otolemur garnettii         | Og                  | CD2              | ENSOGAP00000021497         | 334                |
| Pan troglodytes            | Pt                  | CD2              | ENSPTRP000000051908        | 351                |
| Pongo abelii               | Pa                  | CD2              | ENSPPYP00000001142         | 351                |
| Procavia capensis          | Pc                  | CD2              | ENSPCAP00000001074         | 345                |
| Pteropus vampyrus          | Pv                  | CD2              | ENSPVAP00000005946         | 344                |
| Rattus noveticus           | Rn                  | CD2              | ENSRNOP000000021268        | 344                |
| Sarcophilus harrisi        | Sh                  | CD2              | ENSSHAP00000020941         | 361                |
| Sus scrofa                 | Sus                 | CD2              | ENSSSCP00000007184         | 340                |
| Tupaia belangeri           | Tb                  | CD2              | ENSTBEP00000002274         | 344                |
| Tursiops truncatus         | Tt                  | CD2              | ENSTTRP00000002236         | 344                |
| Pelodiscus sinensis        | Ps                  | CD2              | ENSPSIP00000011387         | 335                |

| <i>Xenopus tropicalis</i>         | Xt                  | CD2              | XP_002943736.1             | 369                |
|-----------------------------------|---------------------|------------------|----------------------------|--------------------|
| <i>Callorhinchus milii</i>        | Cm                  | CD2              | SINCAMP00000024576         | 333                |
| <i>Danio rerio</i>                | Dr                  | CD2              | ENSDARP00000104683         | 311                |
| <i>Gadus morhua</i>               | Gm                  | CD2              | ENSGMOP00000021281         | 353                |
| <i>Gasterosteus aculeatus</i>     | Ga                  | CD2              | ENSGACP00000019026         | 347                |
| <i>Ginglymostoma cirratum</i>     | Gc                  | CD2              | KC814637                   | 401                |
| <i>Oreochromis niloticus</i>      | On                  | CD2 (3of3)       | ENSONIP00000026394         | 333                |
| <i>Oryzias latipes</i>            | Ol                  | CD2              | XP_004069561.1             | 333                |
| <i>Xiphophorus maculatus</i>      | Xm                  | CD2 (2of2)       | ENSXMAP00000004170         | 358                |
|                                   |                     |                  |                            |                    |
| <b>JAM3 sequences</b>             |                     |                  |                            |                    |
| <b>Species</b>                    | <b>Abbreviation</b> | <b>Gene name</b> | <b>Protein Sequence ID</b> | <b>Length (aa)</b> |
| <i>Ailuropoda melanoleuca</i>     | Am                  | JAM3             | ENSAMEP00000007551         | 329                |
| <i>Bos taurus</i>                 | Bt                  | JAM3             | ENSBTAP00000004124         | 302                |
| <i>Canis lupus familiaris</i>     | Clf                 | JAM3             | ENSCAFP00000014414         | 310                |
| <i>Cavia porcellus</i>            | Cp                  | JAM3             | ENSCPOP00000005883         | 332                |
| <i>Dipodomys ordii</i>            | Do                  | JAM3             | ENSDORP00000012016         | 351                |
| <i>Felis catus</i>                | Fc                  | JAM3             | ENSFCAP00000025232         | 310                |
| <i>Gorilla gorilla</i>            | Ggo                 | JAM3             | ENSGGOP00000006618         | 355                |
| <i>Homo sapiens</i>               | Hs                  | JAM3             | ENSP00000299106            | 310                |
| <i>Ictidomys tridecemlineatus</i> | It                  | JAM3             | ENSSTOP00000004915         | 310                |
| <i>Loxodonta africana</i>         | La                  | JAM3             | ENSLAFP00000016317         | 311                |
| <i>Macaca mulatta</i>             | Mmu                 | JAM3             | ENSMMUP00000009302         | 308                |
| <i>Macropus eugenii</i>           | Me                  | JAM3             | ENSMEUP00000003790         | 360                |
| <i>Monodelphis domestica</i>      | Md                  | JAM3             | ENSMODP00000006642         | 310                |
| <i>Mus musculus</i>               | Mm                  | JAM3             | ENSMUSP00000034472         | 310                |
| <i>Mustela putorius furo</i>      | Mpf                 | JAM3             | ENSMPUP00000009024         | 305                |
| <i>Myotis lucifugus</i>           | Ml                  | JAM3             | ENSMLUP00000008832         | 310                |
| <i>Ochontona princeps</i>         | Op                  | JAM3             | ENSOPRP00000009042         | 351                |
| <i>Oryctolagus cuniculus</i>      | Oc                  | JAM3             | ENSOCUP00000004882         | 341                |
| <i>Otolemur garnettii</i>         | Og                  | JAM3             | ENSOGAP00000019903         | 308                |
| <i>Pan troglodytes</i>            | Pt                  | JAM3             | ENSPTRP00000007683         | 355                |
| <i>Pongo abelii</i>               | Pa                  | JAM3             | ENSPPYP00000004683         | 315                |
| <i>Pteropus vampyrus</i>          | Pv                  | JAM3             | ENSPVAP00000003050         | 354                |
| <i>Rattus noveticus</i>           | Rn                  | JAM3             | ENSRNOP00000012247         | 310                |
| <i>Sarcophilus harrisii</i>       | Sh                  | JAM3             | ENSSHAP00000014916         | 308                |
| <i>Sus scrofa</i>                 | Sus                 | JAM3             | ENSSSCP00000016179         | 312                |
| <i>Tursiops truncatus</i>         | Tt                  | JAM3             | ENSTTRP00000002203         | 332                |
| <i>Anolis carolinensis</i>        | Ac                  | JAM3             | ENSACAP00000000996         | 313                |
| <i>Gallus gallus</i>              | Gg                  | JAM3             | ENSGALP00000002228         | 293                |
| <i>Meleagris gallopavo</i>        | Mg                  | JAM3             | ENSMGAP00000000979         | 312                |
| <i>Pelodiscus sinensis</i>        | Ps                  | JAM3             | ENSISP00000018013          | 310                |
| <i>Callorhinchus milii</i>        | Cm                  | JAM3             | SINCAMP00000019910         | 312                |
| <i>Danio rerio</i>                | Dr                  | jam3b            | ENSDARP000000082979        | 333                |
| <i>Gasterosteus aculeatus</i>     | Ga                  | JAM3 (1of2)      | ENSGACP00000026659         | 309                |
| <i>Oreochromis niloticus</i>      | On                  | JAM3 (2of3)      | ENSONIP00000014007         | 307                |
| <i>Oryzias latipes</i>            | Ol                  | JAM3 (1of2)      | ENSORLP00000000363         | 312                |

|                       |    |             |                    |     |
|-----------------------|----|-------------|--------------------|-----|
| Takifugu rubripes     | Tr | JAM3 (1of2) | ENSTRUP00000013636 | 305 |
| Xiphophorus maculatus | Xm | JAM3 (1of2) | ENSXMAP00000006065 | 312 |

**Supplementary Table XI.13 | CD4/LAG3-related sequences in cartilaginous fishes.**

Protein domains were identified using InterproScan.

| Protein Sequence ID                                    | Transcript                                          | Gene location                    | Protein Length (aa) | Predicted IgSF domains | C-terminal TM domain | CxC motif | CxH motif |
|--------------------------------------------------------|-----------------------------------------------------|----------------------------------|---------------------|------------------------|----------------------|-----------|-----------|
| Human CD4 (ENSP00000011653)                            |                                                     | Chr 12p13.31                     | 458                 | 4                      | yes                  | yes       | yes       |
| Mouse CD4 (ENSMUSP00000024044)                         |                                                     | Chr 6                            | 457                 | 4                      | yes                  | yes       | yes       |
| Chicken CD4 (ENSGALP00000036316)                       |                                                     | Chr 1                            | 487                 | 4                      | yes                  | yes       | no        |
| Turkey CD4 (ENSMGAP00000014929)                        |                                                     | Chr 1                            | 488                 | 3                      | yes                  | yes       | no        |
| Zebrafish CD4 (ENSDARP00000121210)                     |                                                     | Chr 16                           | 474                 | 2                      | yes                  | yes       | no        |
| Zebrafish CD4-2 (ENSDARP00000112097)                   |                                                     | Chr 16                           | 383                 | 3                      | yes                  | yes       | no        |
|                                                        |                                                     |                                  |                     |                        |                      |           |           |
| Lamprey CD4-like (AAU09669.1)                          |                                                     | unknown                          | 378                 | 2                      | yes                  | no        | no        |
|                                                        |                                                     |                                  |                     |                        |                      |           |           |
| <i>C. milii</i> (SINCAMP00000010635)                   | Partial, no start codon (or complete short variant) | scaffold_92: 1,246,629-1,251,771 | ≥467 (or 424)       | ≥3 (or 3)              | yes                  | no        | no        |
| <i>C. milii</i> (ES_spleen.CUFF.63498.1_prot/KC795564) | Partial, no start codon                             | scaffold_92: 1,238,976-1,243,099 | ≥292                | ≥2                     | ?                    | ?         | ?         |

|                                                                   |          |         |     |   |     |    |     |
|-------------------------------------------------------------------|----------|---------|-----|---|-----|----|-----|
| <i>G. cirratum</i><br>(NS_thymus.comp347834_c8_prot/K<br>C814636) | Complete | unknown | 825 | 5 | yes | no | no  |
| <i>G. cirratum</i><br>(NS_thymus.comp347425_c9_prot/K<br>C707916) | Complete | unknown | 628 | 4 | yes | no | yes |
